# Supplementary material
Source: publisher figshare collection journal article supplement (https://acs.figshare.com/ndownloader/files/6906230)
Supplement: Supplementary file 1 [file 6906230]

data_global
_audit_creation_date                               2016-06-04
_audit_creation_method                            'by CrystalStructure 4.1'
_audit_update_record                               ?

#==============================================================================
# PROCESSING SUMMARY (IUCr Office Use Only)

_journal_date_recd_electronic                      ?
_journal_date_from_coeditor                        ?
_journal_date_accepted                             ?
_journal_coeditor_code                             ?

#==============================================================================
# SUBMISSION DETAILS

_publ_contact_author_name                         'Katsuhiko Tomooka'
_publ_contact_author_email                        'ktomooka@cm.kyushu-u.ac.jp'
_publ_contact_author_fax                          '81(92)5837810'
_publ_contact_author_phone                        '81(92)5837806'
_publ_contact_letter
;
    ENTER TEXT OF LETTER
;
_publ_requested_journal                           'J. Org. Chem'
_publ_requested_category
                                               'CM'
_publ_requested_coeditor_name                      ?

#==============================================================================
# TITLE AND AUTHOR LIST

_publ_section_title
;
    Concise Synthesis and Stereochemical Analysis of Planar Chiral (E)-4-[7]Orthocyclophene
;
_publ_section_title_footnote
;
    ENTER FOOTNOTE TO TITLE OF PAPER
;
loop_
_publ_author_name
_publ_author_footnote
_publ_author_address
' FIRST AUTHORS NAME '
;
  FIRST AUTHORS FOOTNOTES
;
;
  FIRST AUTHORS ADDRESS
;
_publ_section_synopsis
;
    ENTER SYNOPSIS
;

#==============================================================================
# TEXT

_publ_section_abstract
;
    ENTER ABSTRACT
;
_publ_section_comment
;
    ENTER TEXT
;
_publ_section_references
;
    ENTER OTHER REFERENCES

    Rigaku (2014). CrystalStructure. Version 4.1. 
    Rigaku Corporation, Tokyo, Japan.

    Altomare, A., Cascarano, G., Giacovazzo, C. and Guagliardi, A. 
    (1993). J. Appl. Cryst. 26, 343-350.
    SIR92

    Rigaku (1998). REQAB. 
    Rigaku Corporation, Tokyo, Japan.

;
_publ_section_figure_captions
;
    ENTER FIGURE CAPTIONS
;
_publ_section_exptl_prep
;
    ENTER COMPOUND PREPARATION DETAILS
;
_publ_section_exptl_refinement
;
    ENTER SPECIAL DETAILS OF THE REFINEMENT
;

#==============================================================================
data_Pt-complex-S-8

#==============================================================================
# CHEMICAL DATA

_chemical_formula_sum                             'C21 H27 Cl2 N Pt'
_chemical_formula_moiety                          'C21 H27 Cl2 N Pt'
_chemical_formula_weight                           559.45
_chemical_melting_point                            '>185 degC (decomposition)'
_chemical_absolute_configuration
                                                 'ad'

#==============================================================================
# CRYSTAL DATA
_space_group_crystal_system                        monoclinic
_space_group_name_H-M_alt                         'P 1 21 1'
_space_group_name_Hall                            'P 2yb'
_space_group_IT_number                             4
loop_
_symmetry_equiv_pos_site_id
_space_group_symop_operation_xyz
1   '+X,+Y,+Z'
2   '-X,1/2+Y,-Z'
#------------------------------------------------------------------------------
_cell_length_a                                     12.359(2)
_cell_length_b                                     9.5073(15)
_cell_length_c                                     18.697(3)
_cell_angle_alpha                                  90.0000
_cell_angle_beta                                   105.044(3)
_cell_angle_gamma                                  90.0000
_cell_volume                                       2121.5(6)
_cell_formula_units_Z                              4
_cell_measurement_reflns_used                      7521
_cell_measurement_theta_min                        3.11
_cell_measurement_theta_max                        27.48
_cell_measurement_temperature                      123
#------------------------------------------------------------------------------
_exptl_crystal_description                         prism
_exptl_crystal_colour                              yellow
_exptl_crystal_size_max                            0.150
_exptl_crystal_size_mid                            0.150
_exptl_crystal_size_min                            0.070
_exptl_crystal_density_diffrn                      1.751
_exptl_crystal_density_meas                        ?
_exptl_crystal_density_method                     'not measured'
_exptl_crystal_F_000                               1088.00
_exptl_absorpt_coefficient_mu                      6.843
_exptl_absorpt_correction_type                     multi-scan
_exptl_absorpt_process_details                    'REQAB (Rigaku, 1998)'
_exptl_absorpt_correction_T_min                    0.511
_exptl_absorpt_correction_T_max                    0.619

#==============================================================================
# EXPERIMENTAL DATA

_diffrn_ambient_temperature                        123
_diffrn_radiation_type                            'Mo K\a'
_diffrn_radiation_wavelength                       0.71075
_diffrn_measurement_device_type                   'Rigaku Saturn70'
_diffrn_measurement_method                         \w
_diffrn_detector_area_resol_mean                   7.314
_diffrn_reflns_number                              14813
_diffrn_reflns_av_R_equivalents                    0.0398
_diffrn_reflns_theta_max                           27.477
_diffrn_reflns_theta_min                           3.112
_diffrn_reflns_theta_full                          25.242
_diffrn_measured_fraction_theta_max                0.991
_diffrn_measured_fraction_theta_full               0.990
_diffrn_reflns_Laue_measured_fraction_max          0.991
_diffrn_reflns_Laue_measured_fraction_full         0.990
_diffrn_reflns_point_group_measured_fraction_max   0.956
_diffrn_reflns_point_group_measured_fraction_full  0.974
_diffrn_reflns_limit_h_min                        -15
_diffrn_reflns_limit_h_max                         16
_diffrn_reflns_limit_k_min                        -12
_diffrn_reflns_limit_k_max                         11
_diffrn_reflns_limit_l_min                        -24
_diffrn_reflns_limit_l_max                         24
_diffrn_standards_number                           0
_diffrn_standards_interval_count                   .
_diffrn_standards_decay_%                          ?

#==============================================================================
# REFINEMENT DATA

_refine_special_details
;
    Refinement was performed using all reflections. The weighted 
    R-factor (wR) and goodness of fit (S) are based on F^2^.
    R-factor (gt) are based on F. The threshold expression of
    F^2^ > 2.0 sigma(F^2^) is used only for calculating R-factor (gt).
;
_reflns_number_total                               9300
_reflns_number_gt                                  7476
_reflns_threshold_expression                       F^2^>2.0\s(F^2^)
_refine_ls_structure_factor_coef                   Fsqd
_refine_ls_R_factor_all                            0.0375
_refine_ls_R_factor_gt                             0.0295
_refine_ls_wR_factor_ref                           0.0610
_refine_ls_wR_factor_gt                            0.0591
_refine_ls_number_restraints                       1
_refine_ls_hydrogen_treatment                      constr
_refine_ls_number_reflns                           9300
_refine_ls_number_parameters                       457
_refine_ls_goodness_of_fit_ref                     0.748
_refine_ls_weighting_scheme                        calc
_refine_ls_weighting_details
           'w = 1/[\s^2^(Fo^2^)+(0.0000P)^2^+0.0000P] where P=(Fo^2^+2Fc^2^)/3'
_atom_sites_solution_hydrogens                     geom
_atom_sites_solution_primary                       direct
_atom_sites_solution_secondary                     difmap
_refine_ls_shift/su_max                            0.001
_refine_diff_density_max                           1.38
_refine_diff_density_min                          -0.82
_refine_ls_extinction_method                       none
_refine_ls_extinction_coef                         ?
_refine_ls_abs_structure_details
;
 Flack x determined using 2964 quotients [(I+)-(I-)]/[(I+)+(I-)]
 (Parsons and Flack (2004), Acta Cryst. A60, s61).
;
_refine_ls_abs_structure_Flack                    -0.013(7)

loop_
_atom_type_symbol
_atom_type_description
_atom_type_scat_dispersion_real
_atom_type_scat_dispersion_imag
_atom_type_scat_source
  'C' 'C'  0.0033 0.0016 
;
International Tables for Crystallography
(Vol. C, Tables 4.2.6.8 and 6.1.1.4)
;
  'H' 'H'  0.0000 0.0000 
;
International Tables for Crystallography
(Vol. C, Table 6.1.1.4)
;
  'Cl' 'Cl'  0.1484 0.1585 
;
International Tables for Crystallography
(Vol. C, Tables 4.2.6.8 and 6.1.1.4)
;
  'N' 'N'  0.0061 0.0033 
;
International Tables for Crystallography
(Vol. C, Tables 4.2.6.8 and 6.1.1.4)
;
  'Pt' 'Pt'  -1.7033 8.3905 
;
International Tables for Crystallography
(Vol. C, Tables 4.2.6.8 and 6.1.1.4)
;

#==============================================================================
# ATOMIC COORDINATES AND THERMAL PARAMETERS

loop_
_atom_site_label
_atom_site_type_symbol
_atom_site_fract_x
_atom_site_fract_y
_atom_site_fract_z
_atom_site_U_iso_or_equiv
_atom_site_adp_type
_atom_site_occupancy
_atom_site_site_symmetry_multiplicity
_atom_site_calc_flag
_atom_site_refinement_flags
_atom_site_disorder_assembly
_atom_site_disorder_group
 Pt1 Pt 0.26648(3) 1.16901(4) 0.25484(2) 0.01760(8) Uani 1 2 d . . .
 Pt2 Pt -0.23400(3) 0.83689(3) 0.22606(2) 0.02055(9) Uani 1 2 d . . .
 Cl1 Cl 0.11780(18) 1.0168(3) 0.21589(13) 0.0261(5) Uani 1 2 d . . .
 Cl2 Cl 0.41121(18) 1.3293(3) 0.28297(13) 0.0256(5) Uani 1 2 d . . .
 Cl3 Cl -0.1852(2) 0.7070(2) 0.13499(13) 0.0273(6) Uani 1 2 d . . .
 Cl4 Cl -0.2811(2) 0.9491(3) 0.32285(15) 0.0354(6) Uani 1 2 d . . .
 N1 N 0.1881(6) 1.2999(7) 0.1687(4) 0.0153(17) Uani 1 2 d . . .
 N2 N -0.1790(6) 0.6687(9) 0.2967(4) 0.0210(16) Uani 1 2 d . . .
 C1 C 0.3551(9) 1.0606(10) 0.4977(6) 0.035(3) Uani 1 2 d . . .
 C2 C 0.3280(8) 1.1516(10) 0.4283(5) 0.026(2) Uani 1 2 d . . .
 C3 C 0.3013(8) 1.0594(10) 0.3592(5) 0.021(2) Uani 1 2 d . . .
 C4 C 0.3812(8) 1.0207(10) 0.3234(5) 0.022(2) Uani 1 2 d . . .
 C5 C 0.3860(8) 0.8799(9) 0.2902(6) 0.028(2) Uani 1 2 d . . .
 C6 C 0.4541(8) 0.7800(10) 0.3526(6) 0.030(2) Uani 1 2 d . . .
 C7 C 0.3871(7) 0.7348(9) 0.4068(5) 0.018(2) Uani 1 2 d . . .
 C8 C 0.3856(7) 0.8020(9) 0.4730(5) 0.018(2) Uani 1 2 d . . .
 C9 C 0.4418(8) 0.9443(10) 0.4982(5) 0.026(2) Uani 1 2 d . . .
 C10 C 0.3271(8) 0.6087(10) 0.3895(5) 0.022(2) Uani 1 2 d . . .
 C11 C 0.2700(8) 0.5481(10) 0.4335(6) 0.025(2) Uani 1 2 d . . .
 C12 C 0.2733(8) 0.6093(9) 0.5032(5) 0.023(2) Uani 1 2 d . . .
 C13 C 0.3313(8) 0.7356(10) 0.5201(6) 0.027(2) Uani 1 2 d . . .
 C14 C 0.1108(7) 1.3962(9) 0.1767(5) 0.019(2) Uani 1 2 d . . .
 C15 C 0.0527(7) 1.4767(10) 0.1179(5) 0.024(2) Uani 1 2 d . . .
 C16 C 0.0727(7) 1.4636(10) 0.0482(5) 0.023(2) Uani 1 2 d . . .
 C17 C 0.1515(7) 1.3657(9) 0.0414(5) 0.020(2) Uani 1 2 d . . .
 C18 C 0.2090(7) 1.2843(9) 0.1002(5) 0.020(2) Uani 1 2 d . . .
 C19 C 0.0883(8) 1.4090(10) 0.2525(5) 0.030(3) Uani 1 2 d . . .
 C20 C 0.0095(9) 1.5511(10) -0.0149(6) 0.036(3) Uani 1 2 d . . .
 C21 C 0.2938(7) 1.1795(11) 0.0927(5) 0.027(2) Uani 1 2 d . . .
 C22 C -0.1897(8) 1.2794(10) 0.1526(6) 0.029(3) Uani 1 2 d . . .
 C23 C -0.1808(7) 1.1531(10) 0.2038(5) 0.026(2) Uani 1 2 d . . .
 C24 C -0.2291(7) 1.0241(9) 0.1603(5) 0.0168(19) Uani 1 2 d . . .
 C25 C -0.3401(8) 0.9828(10) 0.1519(5) 0.022(2) Uani 1 2 d . . .
 C26 C -0.4166(8) 0.9252(10) 0.0822(6) 0.032(3) Uani 1 2 d . . .
 C27 C -0.4684(8) 1.0520(11) 0.0318(6) 0.035(3) Uani 1 2 d . . .
 C28 C -0.3925(7) 1.1242(9) -0.0066(5) 0.022(2) Uani 1 2 d . . .
 C29 C -0.3217(8) 1.2366(9) 0.0221(5) 0.021(2) Uani 1 2 d . . .
 C30 C -0.3062(8) 1.3016(10) 0.0984(6) 0.030(2) Uani 1 2 d . . .
 C31 C -0.3960(8) 1.0776(10) -0.0780(6) 0.030(3) Uani 1 2 d . . .
 C32 C -0.3330(9) 1.1375(11) -0.1219(6) 0.036(3) Uani 1 2 d . . .
 C33 C -0.2632(9) 1.2483(11) -0.0937(7) 0.037(3) Uani 1 2 d . . .
 C34 C -0.2574(8) 1.2976(10) -0.0228(6) 0.030(3) Uani 1 2 d . . .
 C35 C -0.0736(7) 0.6683(13) 0.3432(5) 0.028(2) Uani 1 2 d . . .
 C36 C -0.0353(8) 0.5551(11) 0.3885(6) 0.030(2) Uani 1 2 d . . .
 C37 C -0.0993(10) 0.4358(11) 0.3856(6) 0.032(3) Uani 1 2 d . . .
 C38 C -0.2047(9) 0.4379(11) 0.3388(6) 0.034(3) Uani 1 2 d . . .
 C39 C -0.2452(8) 0.5539(11) 0.2938(6) 0.028(2) Uani 1 2 d . . .
 C40 C -0.0006(8) 0.7957(10) 0.3430(6) 0.036(3) Uani 1 2 d . . .
 C41 C -0.0544(10) 0.3060(12) 0.4311(7) 0.054(4) Uani 1 2 d . . .
 C42 C -0.3615(8) 0.5581(11) 0.2431(6) 0.033(3) Uani 1 2 d . . .
 H1A H 0.28506 1.0164 0.5029 0.0426 Uiso 1 2 calc R . .
 H1B H 0.38368 1.12191 0.5413 0.0426 Uiso 1 2 calc R . .
 H2A H 0.39268 1.21296 0.42823 0.0313 Uiso 1 2 calc R . .
 H2B H 0.26286 1.2125 0.42799 0.0313 Uiso 1 2 calc R . .
 H3 H 0.2462 0.98303 0.36047 0.0250 Uiso 1 2 calc R . .
 H4 H 0.45676 1.06161 0.34637 0.0268 Uiso 1 2 calc R . .
 H5A H 0.42322 0.88635 0.24941 0.0341 Uiso 1 2 calc R . .
 H5B H 0.30933 0.84274 0.26992 0.0341 Uiso 1 2 calc R . .
 H6A H 0.47695 0.69524 0.32948 0.0359 Uiso 1 2 calc R . .
 H6B H 0.52295 0.82889 0.3803 0.0359 Uiso 1 2 calc R . .
 H9A H 0.48879 0.97154 0.46486 0.0312 Uiso 1 2 calc R . .
 H9B H 0.49136 0.9346 0.54883 0.0312 Uiso 1 2 calc R . .
 H10 H 0.3268 0.56344 0.34415 0.0259 Uiso 1 2 calc R . .
 H11 H 0.2277 0.46502 0.41807 0.0294 Uiso 1 2 calc R . .
 H12 H 0.23753 0.56618 0.53687 0.0275 Uiso 1 2 calc R . .
 H13 H 0.33404 0.77871 0.56632 0.0324 Uiso 1 2 calc R . .
 H15 H -0.00173 1.54201 0.12495 0.0285 Uiso 1 2 calc R . .
 H17 H 0.16685 1.35361 -0.00548 0.0240 Uiso 1 2 calc R . .
 H19A H 0.05007 1.32402 0.26282 0.0361 Uiso 1 2 calc R . .
 H19B H 0.04081 1.49121 0.25323 0.0361 Uiso 1 2 calc R . .
 H19C H 0.15945 1.4199 0.29021 0.0361 Uiso 1 2 calc R . .
 H20A H 0.00464 1.50124 -0.06149 0.0435 Uiso 1 2 calc R . .
 H20B H 0.04843 1.64082 -0.01516 0.0435 Uiso 1 2 calc R . .
 H20C H -0.06612 1.5688 -0.00956 0.0435 Uiso 1 2 calc R . .
 H21A H 0.27332 1.08691 0.10811 0.0321 Uiso 1 2 calc R . .
 H21B H 0.36732 1.20694 0.12401 0.0321 Uiso 1 2 calc R . .
 H21C H 0.297 1.1752 0.04088 0.0321 Uiso 1 2 calc R . .
 H22A H -0.13384 1.26847 0.12341 0.0349 Uiso 1 2 calc R . .
 H22B H -0.16967 1.36504 0.1833 0.0349 Uiso 1 2 calc R . .
 H23A H -0.10118 1.13615 0.22964 0.0310 Uiso 1 2 calc R . .
 H23B H -0.22183 1.17268 0.24172 0.0310 Uiso 1 2 calc R . .
 H24 H -0.20074 1.00705 0.11554 0.0201 Uiso 1 2 calc R . .
 H25 H -0.38041 1.04723 0.17849 0.0268 Uiso 1 2 calc R . .
 H26A H -0.47673 0.86839 0.09409 0.0386 Uiso 1 2 calc R . .
 H26B H -0.37403 0.86424 0.05624 0.0386 Uiso 1 2 calc R . .
 H27A H -0.53483 1.01806 -0.0062 0.0418 Uiso 1 2 calc R . .
 H27B H -0.4948 1.12215 0.06257 0.0418 Uiso 1 2 calc R . .
 H30A H -0.36353 1.26169 0.12109 0.0359 Uiso 1 2 calc R . .
 H30B H -0.3204 1.4039 0.09238 0.0359 Uiso 1 2 calc R . .
 H31 H -0.44389 1.00094 -0.0976 0.0358 Uiso 1 2 calc R . .
 H32 H -0.33804 1.10272 -0.17031 0.0429 Uiso 1 2 calc R . .
 H33 H -0.21914 1.2908 -0.12256 0.0445 Uiso 1 2 calc R . .
 H34 H -0.20911 1.37416 -0.00389 0.0361 Uiso 1 2 calc R . .
 H36 H 0.03674 0.55935 0.42233 0.0360 Uiso 1 2 calc R . .
 H38 H -0.25177 0.35816 0.33678 0.0409 Uiso 1 2 calc R . .
 H40A H 0.07427 0.77869 0.37558 0.0428 Uiso 1 2 calc R . .
 H40B H -0.03395 0.87781 0.36071 0.0428 Uiso 1 2 calc R . .
 H40C H 0.00533 0.81327 0.29248 0.0428 Uiso 1 2 calc R . .
 H41A H -0.0821 0.30419 0.47569 0.0645 Uiso 1 2 calc R . .
 H41B H 0.02766 0.30865 0.44541 0.0645 Uiso 1 2 calc R . .
 H41C H -0.0799 0.22144 0.40155 0.0645 Uiso 1 2 calc R . .
 H42A H -0.3574 0.5763 0.19231 0.0398 Uiso 1 2 calc R . .
 H42B H -0.40445 0.63322 0.25898 0.0398 Uiso 1 2 calc R . .
 H42C H -0.39861 0.46763 0.24508 0.0398 Uiso 1 2 calc R . .


loop_
_atom_site_aniso_label
_atom_site_aniso_U_11
_atom_site_aniso_U_22
_atom_site_aniso_U_33
_atom_site_aniso_U_12
_atom_site_aniso_U_13
_atom_site_aniso_U_23
 Pt1 0.01706(16) 0.01763(16) 0.01632(18) -0.00270(17) 0.00112(13) 0.00292(17)
 Pt2 0.02304(19) 0.02299(19) 0.0183(2) -0.00313(17) 0.01018(15) -0.00357(18)
 Cl1 0.0218(11) 0.0292(13) 0.0230(12) -0.0098(10) -0.0019(9) 0.0044(11)
 Cl2 0.0232(11) 0.0217(11) 0.0286(13) -0.0077(11) 0.0009(9) 0.0027(13)
 Cl3 0.0401(14) 0.0237(13) 0.0233(12) 0.0060(10) 0.0178(11) 0.0016(10)
 Cl4 0.0455(16) 0.0395(15) 0.0274(14) -0.0059(13) 0.0204(13) -0.0122(12)
 N1 0.012(3) 0.015(4) 0.017(4) 0.001(3) 0.000(3) -0.004(3)
 N2 0.027(4) 0.026(4) 0.015(4) -0.012(4) 0.015(3) -0.005(4)
 C1 0.048(7) 0.025(5) 0.024(6) -0.011(5) -0.008(5) -0.009(5)
 C2 0.041(5) 0.015(5) 0.018(5) -0.008(5) 0.001(4) -0.004(4)
 C3 0.025(5) 0.016(5) 0.017(5) 0.003(4) -0.003(4) 0.001(4)
 C4 0.025(5) 0.021(5) 0.017(5) 0.000(4) -0.003(4) 0.007(4)
 C5 0.033(6) 0.030(6) 0.024(5) 0.005(4) 0.009(4) 0.006(4)
 C6 0.028(5) 0.036(6) 0.029(6) 0.000(5) 0.013(5) 0.005(5)
 C7 0.009(4) 0.025(5) 0.018(5) 0.005(4) 0.003(4) 0.010(4)
 C8 0.022(5) 0.015(5) 0.014(4) 0.003(4) -0.001(4) -0.003(4)
 C9 0.030(6) 0.029(5) 0.012(5) -0.009(4) -0.007(4) 0.007(4)
 C10 0.025(5) 0.023(5) 0.017(5) 0.005(4) 0.006(4) -0.003(4)
 C11 0.026(5) 0.020(5) 0.028(6) -0.003(4) 0.009(4) 0.001(4)
 C12 0.024(5) 0.025(5) 0.020(5) -0.001(4) 0.006(4) 0.013(4)
 C13 0.033(6) 0.034(6) 0.014(5) 0.002(5) 0.005(4) -0.001(5)
 C14 0.013(4) 0.020(5) 0.023(5) -0.000(4) 0.005(4) -0.002(4)
 C15 0.017(5) 0.024(5) 0.028(6) 0.004(4) 0.001(4) 0.002(5)
 C16 0.016(5) 0.025(5) 0.025(5) -0.006(4) 0.002(4) 0.004(4)
 C17 0.022(5) 0.024(5) 0.015(4) -0.005(4) 0.006(4) -0.000(4)
 C18 0.017(5) 0.015(4) 0.027(5) -0.002(4) 0.006(4) -0.000(4)
 C19 0.024(5) 0.044(7) 0.023(6) 0.003(5) 0.009(4) -0.011(5)
 C20 0.034(6) 0.033(6) 0.038(7) 0.002(5) 0.003(5) 0.009(5)
 C21 0.023(4) 0.036(6) 0.024(5) 0.012(5) 0.012(4) 0.005(5)
 C22 0.030(6) 0.016(5) 0.037(7) 0.002(4) 0.000(5) -0.011(5)
 C23 0.019(4) 0.026(5) 0.030(5) -0.004(4) 0.002(4) 0.002(5)
 C24 0.025(5) 0.017(5) 0.010(4) 0.003(4) 0.008(4) 0.001(4)
 C25 0.028(5) 0.022(5) 0.017(5) -0.007(4) 0.007(4) 0.000(5)
 C26 0.022(5) 0.026(6) 0.043(7) -0.005(4) -0.002(5) -0.005(5)
 C27 0.019(5) 0.034(6) 0.043(7) -0.002(5) -0.008(5) -0.012(5)
 C28 0.021(5) 0.020(5) 0.023(5) 0.004(4) 0.001(4) -0.000(4)
 C29 0.020(5) 0.021(5) 0.020(5) 0.009(4) 0.001(4) -0.006(4)
 C30 0.029(5) 0.022(6) 0.032(6) 0.006(4) -0.005(4) -0.002(4)
 C31 0.028(5) 0.021(5) 0.033(6) 0.005(4) -0.005(5) -0.001(5)
 C32 0.040(6) 0.043(7) 0.021(5) 0.017(5) 0.003(5) 0.006(5)
 C33 0.029(6) 0.037(7) 0.044(7) 0.008(5) 0.007(5) 0.018(6)
 C34 0.036(6) 0.025(6) 0.027(6) -0.004(5) 0.004(5) 0.008(5)
 C35 0.026(5) 0.034(5) 0.028(5) -0.009(6) 0.014(4) -0.002(6)
 C36 0.024(5) 0.041(6) 0.032(6) 0.000(5) 0.019(5) 0.006(5)
 C37 0.044(7) 0.033(6) 0.033(6) 0.002(5) 0.034(6) 0.010(5)
 C38 0.044(7) 0.032(6) 0.029(6) -0.012(5) 0.014(5) 0.002(5)
 C39 0.029(6) 0.037(6) 0.022(5) -0.008(5) 0.016(4) -0.001(5)
 C40 0.027(5) 0.036(7) 0.040(7) -0.010(5) 0.002(5) 0.011(5)
 C41 0.057(8) 0.050(9) 0.066(9) 0.013(7) 0.036(7) 0.034(7)
 C42 0.037(6) 0.042(6) 0.024(6) -0.020(5) 0.013(5) -0.003(5)

#==============================================================================
_computing_data_collection
                                             'CrystalClear (Rigaku Inc., 2008)'
_computing_cell_refinement                         CrystalClear
_computing_data_reduction                          CrystalClear
_computing_structure_solution
                                               'SIR92 (Altomare, et al., 1994)'
_computing_structure_refinement
                                                 'SHELXL2013 (Sheldrick, 2008)'
_computing_publication_material
                                          'CrystalStructure 4.1 (Rigaku, 2014)'
_computing_molecular_graphics                     'CrystalStructure 4.1'

#==============================================================================
# MOLECULAR GEOMETRY

_geom_special_details
;
    ENTER SPECIAL DETAILS OF THE MOLECULAR GEOMETRY
;

loop_
_geom_bond_atom_site_label_1
_geom_bond_atom_site_label_2
_geom_bond_distance
_geom_bond_publ_flag
_geom_bond_site_symmetry_1
_geom_bond_site_symmetry_2
Pt1 Cl1 2.303(2) yes . .
Pt1 Cl2 2.305(2) yes . .
Pt1 N1 2.067(7) yes . .
Pt1 C3 2.154(9) yes . .
Pt1 C4 2.167(9) yes . .
Pt2 Cl3 2.307(3) yes . .
Pt2 Cl4 2.302(3) yes . .
Pt2 N2 2.072(8) yes . .
Pt2 C24 2.173(9) yes . .
Pt2 C25 2.150(9) yes . .
N1 C14 1.360(11) yes . .
N1 C18 1.378(13) yes . .
N2 C35 1.367(10) yes . .
N2 C39 1.356(13) yes . .
C1 C2 1.523(13) yes . .
C1 C9 1.538(14) yes . .
C2 C3 1.524(13) yes . .
C3 C4 1.378(15) yes . .
C4 C5 1.483(13) yes . .
C5 C6 1.569(13) yes . .
C6 C7 1.526(15) yes . .
C7 C8 1.397(13) yes . .
C7 C10 1.403(13) yes . .
C8 C9 1.537(12) yes . .
C8 C13 1.390(15) yes . .
C10 C11 1.345(15) yes . .
C11 C12 1.418(14) yes . .
C12 C13 1.392(13) yes . .
C14 C15 1.379(12) yes . .
C14 C19 1.517(15) yes . .
C15 C16 1.392(15) yes . .
C16 C17 1.378(13) yes . .
C16 C20 1.488(13) yes . .
C17 C18 1.381(12) yes . .
C18 C21 1.479(13) yes . .
C22 C23 1.522(14) yes . .
C22 C30 1.545(13) yes . .
C23 C24 1.508(12) yes . .
C24 C25 1.396(13) yes . .
C25 C26 1.501(13) yes . .
C26 C27 1.561(14) yes . .
C27 C28 1.488(15) yes . .
C28 C29 1.397(12) yes . .
C28 C31 1.396(15) yes . .
C29 C30 1.521(14) yes . .
C29 C34 1.421(16) yes . .
C31 C32 1.392(16) yes . .
C32 C33 1.377(14) yes . .
C33 C34 1.390(16) yes . .
C35 C36 1.374(15) yes . .
C35 C40 1.511(15) yes . .
C36 C37 1.376(15) yes . .
C37 C38 1.368(14) yes . .
C37 C41 1.520(15) yes . .
C38 C39 1.399(14) yes . .
C39 C42 1.503(13) yes . .
C1 H1A 0.990 no . .
C1 H1B 0.990 no . .
C2 H2A 0.990 no . .
C2 H2B 0.990 no . .
C3 H3 1.000 no . .
C4 H4 1.000 no . .
C5 H5A 0.990 no . .
C5 H5B 0.990 no . .
C6 H6A 0.990 no . .
C6 H6B 0.990 no . .
C9 H9A 0.990 no . .
C9 H9B 0.990 no . .
C10 H10 0.950 no . .
C11 H11 0.950 no . .
C12 H12 0.950 no . .
C13 H13 0.950 no . .
C15 H15 0.950 no . .
C17 H17 0.950 no . .
C19 H19A 0.980 no . .
C19 H19B 0.980 no . .
C19 H19C 0.980 no . .
C20 H20A 0.980 no . .
C20 H20B 0.980 no . .
C20 H20C 0.980 no . .
C21 H21A 0.980 no . .
C21 H21B 0.980 no . .
C21 H21C 0.980 no . .
C22 H22A 0.990 no . .
C22 H22B 0.990 no . .
C23 H23A 0.990 no . .
C23 H23B 0.990 no . .
C24 H24 1.000 no . .
C25 H25 1.000 no . .
C26 H26A 0.990 no . .
C26 H26B 0.990 no . .
C27 H27A 0.990 no . .
C27 H27B 0.990 no . .
C30 H30A 0.990 no . .
C30 H30B 0.990 no . .
C31 H31 0.950 no . .
C32 H32 0.950 no . .
C33 H33 0.950 no . .
C34 H34 0.950 no . .
C36 H36 0.950 no . .
C38 H38 0.950 no . .
C40 H40A 0.980 no . .
C40 H40B 0.980 no . .
C40 H40C 0.980 no . .
C41 H41A 0.980 no . .
C41 H41B 0.980 no . .
C41 H41C 0.980 no . .
C42 H42A 0.980 no . .
C42 H42B 0.980 no . .
C42 H42C 0.980 no . .

loop_
_geom_angle_atom_site_label_1
_geom_angle_atom_site_label_2
_geom_angle_atom_site_label_3
_geom_angle
_geom_angle_publ_flag
_geom_angle_site_symmetry_1
_geom_angle_site_symmetry_2
_geom_angle_site_symmetry_3
Cl1 Pt1 Cl2 174.77(9) yes . . .
Cl1 Pt1 N1 87.58(19) yes . . .
Cl1 Pt1 C3 86.4(2) yes . . .
Cl1 Pt1 C4 97.1(2) yes . . .
Cl2 Pt1 N1 87.62(19) yes . . .
Cl2 Pt1 C3 98.8(2) yes . . .
Cl2 Pt1 C4 86.9(3) yes . . .
N1 Pt1 C3 160.1(4) yes . . .
N1 Pt1 C4 162.7(4) yes . . .
C3 Pt1 C4 37.2(4) yes . . .
Cl3 Pt2 Cl4 175.09(9) yes . . .
Cl3 Pt2 N2 87.2(2) yes . . .
Cl3 Pt2 C24 88.2(3) yes . . .
Cl3 Pt2 C25 95.8(3) yes . . .
Cl4 Pt2 N2 88.0(2) yes . . .
Cl4 Pt2 C24 96.6(3) yes . . .
Cl4 Pt2 C25 88.4(3) yes . . .
N2 Pt2 C24 160.0(3) yes . . .
N2 Pt2 C25 162.3(3) yes . . .
C24 Pt2 C25 37.7(4) yes . . .
Pt1 N1 C14 121.3(6) yes . . .
Pt1 N1 C18 119.8(5) yes . . .
C14 N1 C18 118.8(7) yes . . .
Pt2 N2 C35 120.6(7) yes . . .
Pt2 N2 C39 120.0(5) yes . . .
C35 N2 C39 119.2(9) yes . . .
C2 C1 C9 114.4(9) yes . . .
C1 C2 C3 110.3(8) yes . . .
Pt1 C3 C2 115.9(6) yes . . .
Pt1 C3 C4 71.9(6) yes . . .
C2 C3 C4 122.7(8) yes . . .
Pt1 C4 C3 70.9(5) yes . . .
Pt1 C4 C5 115.5(6) yes . . .
C3 C4 C5 123.8(9) yes . . .
C4 C5 C6 107.9(8) yes . . .
C5 C6 C7 112.7(8) yes . . .
C6 C7 C8 126.3(8) yes . . .
C6 C7 C10 115.7(9) yes . . .
C8 C7 C10 117.9(9) yes . . .
C7 C8 C9 124.4(9) yes . . .
C7 C8 C13 118.2(8) yes . . .
C9 C8 C13 117.3(8) yes . . .
C1 C9 C8 111.9(8) yes . . .
C7 C10 C11 123.7(9) yes . . .
C10 C11 C12 119.5(9) yes . . .
C11 C12 C13 116.8(9) yes . . .
C8 C13 C12 123.6(9) yes . . .
N1 C14 C15 121.4(9) yes . . .
N1 C14 C19 117.5(8) yes . . .
C15 C14 C19 121.1(8) yes . . .
C14 C15 C16 121.0(9) yes . . .
C15 C16 C17 116.7(8) yes . . .
C15 C16 C20 120.5(9) yes . . .
C17 C16 C20 122.8(10) yes . . .
C16 C17 C18 122.3(9) yes . . .
N1 C18 C17 119.9(8) yes . . .
N1 C18 C21 118.0(7) yes . . .
C17 C18 C21 122.1(9) yes . . .
C23 C22 C30 115.0(8) yes . . .
C22 C23 C24 110.4(7) yes . . .
Pt2 C24 C23 115.2(6) yes . . .
Pt2 C24 C25 70.3(5) yes . . .
C23 C24 C25 122.0(9) yes . . .
Pt2 C25 C24 72.1(5) yes . . .
Pt2 C25 C26 117.8(7) yes . . .
C24 C25 C26 125.4(10) yes . . .
C25 C26 C27 108.0(8) yes . . .
C26 C27 C28 115.9(8) yes . . .
C27 C28 C29 125.3(9) yes . . .
C27 C28 C31 116.5(8) yes . . .
C29 C28 C31 118.1(9) yes . . .
C28 C29 C30 125.8(9) yes . . .
C28 C29 C34 118.4(9) yes . . .
C30 C29 C34 115.8(8) yes . . .
C22 C30 C29 115.3(9) yes . . .
C28 C31 C32 123.4(9) yes . . .
C31 C32 C33 118.6(10) yes . . .
C32 C33 C34 119.7(11) yes . . .
C29 C34 C33 121.9(9) yes . . .
N2 C35 C36 120.9(10) yes . . .
N2 C35 C40 117.8(9) yes . . .
C36 C35 C40 121.3(8) yes . . .
C35 C36 C37 121.2(9) yes . . .
C36 C37 C38 117.1(10) yes . . .
C36 C37 C41 121.7(9) yes . . .
C38 C37 C41 121.2(10) yes . . .
C37 C38 C39 121.9(10) yes . . .
N2 C39 C38 119.5(8) yes . . .
N2 C39 C42 118.2(8) yes . . .
C38 C39 C42 122.3(9) yes . . .
C2 C1 H1A 108.661 no . . .
C2 C1 H1B 108.659 no . . .
C9 C1 H1A 108.667 no . . .
C9 C1 H1B 108.666 no . . .
H1A C1 H1B 107.604 no . . .
C1 C2 H2A 109.600 no . . .
C1 C2 H2B 109.609 no . . .
C3 C2 H2A 109.599 no . . .
C3 C2 H2B 109.597 no . . .
H2A C2 H2B 108.133 no . . .
Pt1 C3 H3 113.323 no . . .
C2 C3 H3 113.328 no . . .
C4 C3 H3 113.321 no . . .
Pt1 C4 H4 113.298 no . . .
C3 C4 H4 113.302 no . . .
C5 C4 H4 113.303 no . . .
C4 C5 H5A 110.130 no . . .
C4 C5 H5B 110.128 no . . .
C6 C5 H5A 110.121 no . . .
C6 C5 H5B 110.127 no . . .
H5A C5 H5B 108.443 no . . .
C5 C6 H6A 109.060 no . . .
C5 C6 H6B 109.063 no . . .
C7 C6 H6A 109.061 no . . .
C7 C6 H6B 109.062 no . . .
H6A C6 H6B 107.824 no . . .
C1 C9 H9A 109.240 no . . .
C1 C9 H9B 109.241 no . . .
C8 C9 H9A 109.235 no . . .
C8 C9 H9B 109.236 no . . .
H9A C9 H9B 107.917 no . . .
C7 C10 H10 118.146 no . . .
C11 C10 H10 118.145 no . . .
C10 C11 H11 120.253 no . . .
C12 C11 H11 120.238 no . . .
C11 C12 H12 121.584 no . . .
C13 C12 H12 121.572 no . . .
C8 C13 H13 118.170 no . . .
C12 C13 H13 118.185 no . . .
C14 C15 H15 119.511 no . . .
C16 C15 H15 119.502 no . . .
C16 C17 H17 118.842 no . . .
C18 C17 H17 118.852 no . . .
C14 C19 H19A 109.464 no . . .
C14 C19 H19B 109.463 no . . .
C14 C19 H19C 109.464 no . . .
H19A C19 H19B 109.485 no . . .
H19A C19 H19C 109.476 no . . .
H19B C19 H19C 109.476 no . . .
C16 C20 H20A 109.473 no . . .
C16 C20 H20B 109.478 no . . .
C16 C20 H20C 109.477 no . . .
H20A C20 H20B 109.467 no . . .
H20A C20 H20C 109.462 no . . .
H20B C20 H20C 109.470 no . . .
C18 C21 H21A 109.465 no . . .
C18 C21 H21B 109.474 no . . .
C18 C21 H21C 109.473 no . . .
H21A C21 H21B 109.464 no . . .
H21A C21 H21C 109.478 no . . .
H21B C21 H21C 109.474 no . . .
C23 C22 H22A 108.519 no . . .
C23 C22 H22B 108.518 no . . .
C30 C22 H22A 108.524 no . . .
C30 C22 H22B 108.516 no . . .
H22A C22 H22B 107.523 no . . .
C22 C23 H23A 109.584 no . . .
C22 C23 H23B 109.586 no . . .
C24 C23 H23A 109.586 no . . .
C24 C23 H23B 109.578 no . . .
H23A C23 H23B 108.117 no . . .
Pt2 C24 H24 114.077 no . . .
C23 C24 H24 114.076 no . . .
C25 C24 H24 114.081 no . . .
Pt2 C25 H25 111.913 no . . .
C24 C25 H25 111.915 no . . .
C26 C25 H25 111.909 no . . .
C25 C26 H26A 110.092 no . . .
C25 C26 H26B 110.091 no . . .
C27 C26 H26A 110.098 no . . .
C27 C26 H26B 110.100 no . . .
H26A C26 H26B 108.430 no . . .
C26 C27 H27A 108.314 no . . .
C26 C27 H27B 108.322 no . . .
C28 C27 H27A 108.315 no . . .
C28 C27 H27B 108.323 no . . .
H27A C27 H27B 107.411 no . . .
C22 C30 H30A 108.446 no . . .
C22 C30 H30B 108.438 no . . .
C29 C30 H30A 108.428 no . . .
C29 C30 H30B 108.434 no . . .
H30A C30 H30B 107.482 no . . .
C28 C31 H31 118.312 no . . .
C32 C31 H31 118.299 no . . .
C31 C32 H32 120.715 no . . .
C33 C32 H32 120.715 no . . .
C32 C33 H33 120.168 no . . .
C34 C33 H33 120.171 no . . .
C29 C34 H34 119.067 no . . .
C33 C34 H34 119.052 no . . .
C35 C36 H36 119.381 no . . .
C37 C36 H36 119.375 no . . .
C37 C38 H38 119.055 no . . .
C39 C38 H38 119.059 no . . .
C35 C40 H40A 109.472 no . . .
C35 C40 H40B 109.471 no . . .
C35 C40 H40C 109.472 no . . .
H40A C40 H40B 109.474 no . . .
H40A C40 H40C 109.468 no . . .
H40B C40 H40C 109.470 no . . .
C37 C41 H41A 109.461 no . . .
C37 C41 H41B 109.471 no . . .
C37 C41 H41C 109.476 no . . .
H41A C41 H41B 109.473 no . . .
H41A C41 H41C 109.466 no . . .
H41B C41 H41C 109.480 no . . .
C39 C42 H42A 109.470 no . . .
C39 C42 H42B 109.470 no . . .
C39 C42 H42C 109.477 no . . .
H42A C42 H42B 109.466 no . . .
H42A C42 H42C 109.474 no . . .
H42B C42 H42C 109.470 no . . .

loop_
_geom_torsion_atom_site_label_1
_geom_torsion_atom_site_label_2
_geom_torsion_atom_site_label_3
_geom_torsion_atom_site_label_4
_geom_torsion
_geom_torsion_publ_flag
_geom_torsion_site_symmetry_1
_geom_torsion_site_symmetry_2
_geom_torsion_site_symmetry_3
_geom_torsion_site_symmetry_4
Cl1 Pt1 N1 C14 86.9(4) no . . . .
Cl1 Pt1 N1 C18 -89.1(4) no . . . .
Cl1 Pt1 C3 C2 -135.1(6) no . . . .
Cl1 Pt1 C3 C4 106.7(3) no . . . .
Cl1 Pt1 C4 C3 -74.4(3) no . . . .
Cl1 Pt1 C4 C5 44.7(6) no . . . .
Cl2 Pt1 N1 C14 -95.2(4) no . . . .
Cl2 Pt1 N1 C18 88.8(4) no . . . .
Cl2 Pt1 C3 C2 45.3(6) no . . . .
Cl2 Pt1 C3 C4 -72.9(3) no . . . .
Cl2 Pt1 C4 C3 108.9(3) no . . . .
Cl2 Pt1 C4 C5 -132.0(6) no . . . .
C3 Pt1 C4 C3 -0.0(4) no . . . .
C3 Pt1 C4 C5 119.1(9) no . . . .
C4 Pt1 C3 C2 118.2(8) no . . . .
C4 Pt1 C3 C4 -0.0(4) no . . . .
Cl3 Pt2 N2 C35 97.0(5) no . . . .
Cl3 Pt2 N2 C39 -79.0(5) no . . . .
Cl3 Pt2 C24 C23 -141.2(5) no . . . .
Cl3 Pt2 C24 C25 101.9(3) no . . . .
Cl3 Pt2 C25 C24 -79.5(4) no . . . .
Cl3 Pt2 C25 C26 41.7(7) no . . . .
Cl4 Pt2 N2 C35 -84.1(5) no . . . .
Cl4 Pt2 N2 C39 99.9(5) no . . . .
Cl4 Pt2 C24 C23 38.3(5) no . . . .
Cl4 Pt2 C24 C25 -78.7(3) no . . . .
Cl4 Pt2 C25 C24 103.0(4) no . . . .
Cl4 Pt2 C25 C26 -135.8(6) no . . . .
N2 Pt2 C24 C23 -64.2(12) no . . . .
N2 Pt2 C24 C25 178.9(7) no . . . .
C24 Pt2 N2 C35 19.8(13) no . . . .
C24 Pt2 N2 C39 -156.1(7) no . . . .
C24 Pt2 C25 C24 0.0(4) no . . . .
C24 Pt2 C25 C26 121.2(10) no . . . .
C25 Pt2 C24 C23 116.9(9) no . . . .
C25 Pt2 C24 C25 -0.0(4) no . . . .
Pt1 N1 C14 C15 -175.4(5) no . . . .
Pt1 N1 C14 C19 2.9(9) no . . . .
Pt1 N1 C18 C17 175.9(5) no . . . .
Pt1 N1 C18 C21 -4.2(9) no . . . .
C14 N1 C18 C17 -0.1(11) no . . . .
C14 N1 C18 C21 179.7(6) no . . . .
C18 N1 C14 C15 0.6(11) no . . . .
C18 N1 C14 C19 179.0(6) no . . . .
Pt2 N2 C35 C36 -177.9(6) no . . . .
Pt2 N2 C35 C40 1.8(11) no . . . .
Pt2 N2 C39 C38 176.5(6) no . . . .
Pt2 N2 C39 C42 -5.1(12) no . . . .
C35 N2 C39 C38 0.4(14) no . . . .
C35 N2 C39 C42 178.9(8) no . . . .
C39 N2 C35 C36 -1.9(14) no . . . .
C39 N2 C35 C40 177.8(8) no . . . .
C2 C1 C9 C8 -97.0(9) no . . . .
C9 C1 C2 C3 49.5(10) no . . . .
C1 C2 C3 Pt1 -177.8(7) no . . . .
C1 C2 C3 C4 -93.4(10) no . . . .
Pt1 C3 C4 Pt1 0.0 no . . . .
Pt1 C3 C4 C5 -108.5(7) no . . . .
C2 C3 C4 Pt1 -109.7(8) no . . . .
C2 C3 C4 C5 141.8(8) no . . . .
Pt1 C4 C5 C6 -169.2(5) no . . . .
C3 C4 C5 C6 -85.9(10) no . . . .
C4 C5 C6 C7 74.8(9) no . . . .
C5 C6 C7 C8 -92.0(9) no . . . .
C5 C6 C7 C10 92.1(9) no . . . .
C6 C7 C8 C9 7.4(13) no . . . .
C6 C7 C8 C13 -171.6(7) no . . . .
C6 C7 C10 C11 175.2(7) no . . . .
C8 C7 C10 C11 -1.0(12) no . . . .
C10 C7 C8 C9 -176.7(7) no . . . .
C10 C7 C8 C13 4.2(11) no . . . .
C7 C8 C9 C1 111.6(9) no . . . .
C7 C8 C13 C12 -3.5(13) no . . . .
C9 C8 C13 C12 177.4(7) no . . . .
C13 C8 C9 C1 -69.3(9) no . . . .
C7 C10 C11 C12 -3.1(13) no . . . .
C10 C11 C12 C13 3.8(12) no . . . .
C11 C12 C13 C8 -0.5(13) no . . . .
N1 C14 C15 C16 -1.1(13) no . . . .
C19 C14 C15 C16 -179.3(7) no . . . .
C14 C15 C16 C17 0.9(12) no . . . .
C14 C15 C16 C20 -180.0(7) no . . . .
C15 C16 C17 C18 -0.4(12) no . . . .
C20 C16 C17 C18 -179.5(7) no . . . .
C16 C17 C18 N1 0.0(12) no . . . .
C16 C17 C18 C21 -179.8(7) no . . . .
C23 C22 C30 C29 -94.2(10) no . . . .
C30 C22 C23 C24 48.6(11) no . . . .
C22 C23 C24 Pt2 -175.8(6) no . . . .
C22 C23 C24 C25 -94.2(10) no . . . .
Pt2 C24 C25 Pt2 -0.000(11) no . . . .
Pt2 C24 C25 C26 -111.8(8) no . . . .
C23 C24 C25 Pt2 -108.0(8) no . . . .
C23 C24 C25 C26 140.2(8) no . . . .
Pt2 C25 C26 C27 -170.2(6) no . . . .
C24 C25 C26 C27 -83.2(11) no . . . .
C25 C26 C27 C28 75.2(11) no . . . .
C26 C27 C28 C29 -89.2(11) no . . . .
C26 C27 C28 C31 93.0(9) no . . . .
C27 C28 C29 C30 2.4(14) no . . . .
C27 C28 C29 C34 -177.6(7) no . . . .
C27 C28 C31 C32 177.8(7) no . . . .
C29 C28 C31 C32 -0.2(13) no . . . .
C31 C28 C29 C30 -179.8(7) no . . . .
C31 C28 C29 C34 0.2(12) no . . . .
C28 C29 C30 C22 112.6(10) no . . . .
C28 C29 C34 C33 -0.1(13) no . . . .
C30 C29 C34 C33 179.8(7) no . . . .
C34 C29 C30 C22 -67.4(10) no . . . .
C28 C31 C32 C33 0.2(14) no . . . .
C31 C32 C33 C34 -0.2(14) no . . . .
C32 C33 C34 C29 0.1(14) no . . . .
N2 C35 C36 C37 3.5(16) no . . . .
C40 C35 C36 C37 -176.2(9) no . . . .
C35 C36 C37 C38 -3.4(17) no . . . .
C35 C36 C37 C41 175.3(10) no . . . .
C36 C37 C38 C39 2.0(18) no . . . .
C41 C37 C38 C39 -176.7(10) no . . . .
C37 C38 C39 N2 -0.5(17) no . . . .
C37 C38 C39 C42 -178.9(10) no . . . .

loop_
_geom_contact_atom_site_label_1
_geom_contact_atom_site_label_2
_geom_contact_distance
_geom_contact_publ_flag
_geom_contact_site_symmetry_1
_geom_contact_site_symmetry_2
Pt1 C19 3.163(10) no . .
Pt1 C21 3.139(10) no . .
Pt2 C40 3.159(9) no . .
Pt2 C42 3.142(11) no . .
Cl1 C5 3.496(10) no . .
Cl2 C2 3.570(10) no . .
Cl3 C26 3.463(10) no . .
Cl3 C39 3.553(11) no . .
Cl4 C23 3.418(10) no . .
N1 C16 2.804(11) no . .
N2 C37 2.790(13) no . .
C1 C4 3.377(15) no . .
C1 C13 3.142(14) no . .
C2 C8 3.456(12) no . .
C3 C6 3.280(14) no . .
C3 C7 3.309(13) no . .
C3 C8 3.233(12) no . .
C3 C9 2.936(12) no . .
C4 C7 3.125(13) no . .
C4 C8 3.473(13) no . .
C4 C9 3.239(13) no . .
C5 C8 3.497(14) no . .
C5 C10 3.365(14) no . .
C6 C9 3.175(15) no . .
C7 C12 2.823(14) no . .
C8 C11 2.804(12) no . .
C10 C13 2.711(14) no . .
C14 C17 2.720(14) no . .
C15 C18 2.741(13) no . .
C22 C25 3.376(14) no . .
C22 C34 3.172(15) no . .
C23 C29 3.484(12) no . .
C24 C27 3.301(12) no . .
C24 C28 3.383(12) no . .
C24 C29 3.244(12) no . .
C24 C30 2.938(12) no . .
C25 C28 3.164(14) no . .
C25 C29 3.471(14) no . .
C25 C30 3.252(14) no . .
C26 C29 3.476(14) no . .
C26 C31 3.395(16) no . .
C27 C30 3.146(13) no . .
C28 C33 2.819(16) no . .
C29 C32 2.822(15) no . .
C31 C34 2.730(13) no . .
C35 C38 2.713(16) no . .
C36 C39 2.735(13) no . .
Cl4 C12 3.569(10) no . 2_556
C9 C10 3.449(12) no . 2_656
C9 C11 3.597(13) no . 2_656
C10 C9 3.449(12) no . 2_646
C11 C9 3.597(13) no . 2_646
C12 Cl4 3.569(10) no . 2_546
C16 C32 3.561(13) no . 2_555
C16 C33 3.542(14) no . 2_555
C17 C20 3.555(13) no . 2_545
C17 C31 3.547(13) no . 2_555
C17 C32 3.496(13) no . 2_555
C18 C20 3.538(13) no . 2_545
C19 C36 3.570(16) no . 1_565
C20 C17 3.555(13) no . 2_555
C20 C18 3.538(13) no . 2_555
C31 C17 3.547(13) no . 2_545
C32 C16 3.561(13) no . 2_545
C32 C17 3.496(13) no . 2_545
C33 C16 3.542(14) no . 2_545
C36 C19 3.570(16) no . 1_545
Pt1 H2A 3.2391 no . .
Pt1 H2B 3.2754 no . .
Pt1 H5A 3.3296 no . .
Pt1 H5B 3.1471 no . .
Pt1 H19A 3.0910 no . .
Pt1 H19C 2.8863 no . .
Pt1 H21A 2.8745 no . .
Pt1 H21B 3.0412 no . .
Pt2 H23A 3.2767 no . .
Pt2 H23B 3.2058 no . .
Pt2 H26A 3.3666 no . .
Pt2 H26B 3.2080 no . .
Pt2 H40B 3.0611 no . .
Pt2 H40C 2.9042 no . .
Pt2 H42A 2.8918 no . .
Pt2 H42B 3.0396 no . .
Cl1 H3 2.7752 no . .
Cl1 H5B 2.8498 no . .
Cl1 H19A 3.2221 no . .
Cl1 H21A 3.1952 no . .
Cl2 H2A 2.9959 no . .
Cl2 H4 2.8026 no . .
Cl2 H19C 3.2648 no . .
Cl2 H21B 3.1055 no . .
Cl3 H24 2.8758 no . .
Cl3 H26B 2.8403 no . .
Cl3 H40C 3.4109 no . .
Cl3 H42A 2.8998 no . .
Cl4 H23B 2.8163 no . .
Cl4 H25 2.8182 no . .
Cl4 H40B 3.0275 no . .
Cl4 H42B 3.4387 no . .
N1 H15 3.2365 no . .
N1 H17 3.2382 no . .
N1 H19A 2.7607 no . .
N1 H19B 3.2582 no . .
N1 H19C 2.6475 no . .
N1 H21A 2.6665 no . .
N1 H21B 2.7099 no . .
N1 H21C 3.2547 no . .
N2 H36 3.2339 no . .
N2 H38 3.2309 no . .
N2 H40A 3.2665 no . .
N2 H40B 2.7360 no . .
N2 H40C 2.6789 no . .
N2 H42A 2.6844 no . .
N2 H42B 2.7120 no . .
N2 H42C 3.2546 no . .
C1 H3 2.6729 no . .
C1 H4 3.3801 no . .
C1 H13 3.0117 no . .
C2 H4 2.6221 no . .
C2 H9A 2.5777 no . .
C2 H9B 3.3248 no . .
C3 H1A 2.7762 no . .
C3 H1B 3.3443 no . .
C3 H5A 3.2856 no . .
C3 H5B 2.6691 no . .
C3 H6B 3.4499 no . .
C3 H9A 2.7558 no . .
C4 H2A 2.6560 no . .
C4 H2B 3.2812 no . .
C4 H6A 3.3046 no . .
C4 H6B 2.5612 no . .
C4 H9A 2.6746 no . .
C5 H3 2.6170 no . .
C5 H9A 3.2984 no . .
C5 H10 3.3147 no . .
C6 H3 3.2469 no . .
C6 H4 2.6806 no . .
C6 H9A 2.7269 no . .
C6 H10 2.5706 no . .
C7 H3 2.9270 no . .
C7 H4 3.4894 no . .
C7 H5A 3.4079 no . .
C7 H5B 2.6920 no . .
C7 H9A 2.6678 no . .
C7 H9B 3.2476 no . .
C7 H11 3.2739 no . .
C7 H13 3.2430 no . .
C8 H1A 2.5249 no . .
C8 H1B 3.3016 no . .
C8 H3 2.9110 no . .
C8 H6A 3.3274 no . .
C8 H6B 2.7336 no . .
C8 H10 3.2501 no . .
C8 H12 3.3076 no . .
C9 H2A 2.8620 no . .
C9 H2B 3.4070 no . .
C9 H3 3.0619 no . .
C9 H4 3.0992 no . .
C9 H6B 2.8659 no . .
C9 H13 2.5992 no . .
C10 H5B 3.1216 no . .
C10 H6A 2.5389 no . .
C10 H6B 3.2386 no . .
C10 H12 3.2500 no . .
C11 H13 3.2518 no . .
C12 H10 3.2399 no . .
C13 H1A 2.7320 no . .
C13 H9A 3.3057 no . .
C13 H9B 2.6886 no . .
C13 H11 3.2597 no . .
C15 H17 3.2196 no . .
C15 H19A 3.0819 no . .
C15 H19B 2.5766 no . .
C15 H19C 3.1949 no . .
C15 H20A 3.2586 no . .
C15 H20B 2.9251 no . .
C15 H20C 2.6046 no . .
C17 H15 3.2213 no . .
C17 H20A 2.6159 no . .
C17 H20B 2.9808 no . .
C17 H20C 3.2469 no . .
C17 H21A 3.1418 no . .
C17 H21B 3.1045 no . .
C17 H21C 2.5534 no . .
C19 H15 2.6727 no . .
C20 H15 2.6552 no . .
C20 H17 2.6757 no . .
C21 H17 2.6598 no . .
C22 H24 2.6745 no . .
C22 H25 3.3549 no . .
C22 H34 3.0108 no . .
C23 H25 2.5918 no . .
C23 H30A 2.5975 no . .
C23 H30B 3.3376 no . .
C24 H22A 2.7713 no . .
C24 H22B 3.3270 no . .
C24 H26A 3.3348 no . .
C24 H26B 2.7369 no . .
C24 H27B 3.4458 no . .
C24 H30A 2.7870 no . .
C25 H23A 3.2761 no . .
C25 H23B 2.6354 no . .
C25 H27A 3.3082 no . .
C25 H27B 2.5574 no . .
C25 H30A 2.7131 no . .
C26 H24 2.6922 no . .
C26 H30A 3.3084 no . .
C26 H31 3.3672 no . .
C27 H24 3.2995 no . .
C27 H25 2.6760 no . .
C27 H30A 2.7050 no . .
C27 H31 2.5609 no . .
C28 H24 3.0433 no . .
C28 H25 3.5023 no . .
C28 H26A 3.4004 no . .
C28 H26B 2.7209 no . .
C28 H30A 2.6631 no . .
C28 H30B 3.2299 no . .
C28 H32 3.3063 no . .
C28 H34 3.2748 no . .
C29 H22A 2.6050 no . .
C29 H22B 3.3412 no . .
C29 H24 2.9482 no . .
C29 H27A 3.2879 no . .
C29 H27B 2.6781 no . .
C29 H31 3.2488 no . .
C29 H33 3.3120 no . .
C30 H23A 3.4182 no . .
C30 H23B 2.8834 no . .
C30 H24 3.0700 no . .
C30 H25 3.1046 no . .
C30 H27B 2.8247 no . .
C30 H34 2.6020 no . .
C31 H26B 3.1829 no . .
C31 H27A 2.5022 no . .
C31 H27B 3.2005 no . .
C31 H33 3.2447 no . .
C32 H34 3.2438 no . .
C33 H31 3.2310 no . .
C34 H22A 2.7779 no . .
C34 H30A 3.3029 no . .
C34 H30B 2.6719 no . .
C34 H32 3.2559 no . .
C36 H38 3.2026 no . .
C36 H40A 2.5647 no . .
C36 H40B 3.1121 no . .
C36 H40C 3.1563 no . .
C36 H41A 3.0294 no . .
C36 H41B 2.6078 no . .
C36 H41C 3.2402 no . .
C38 H36 3.2029 no . .
C38 H41A 2.9068 no . .
C38 H41B 3.2799 no . .
C38 H41C 2.6551 no . .
C38 H42A 3.1797 no . .
C38 H42B 3.1398 no . .
C38 H42C 2.5909 no . .
C40 H36 2.6661 no . .
C41 H36 2.6822 no . .
C41 H38 2.6593 no . .
C42 H38 2.6995 no . .
H1A H2A 2.8591 no . .
H1A H2B 2.3051 no . .
H1A H3 2.5998 no . .
H1A H9A 2.8208 no . .
H1A H9B 2.5896 no . .
H1A H13 2.5508 no . .
H1B H2A 2.3136 no . .
H1B H2B 2.4119 no . .
H1B H9A 2.5957 no . .
H1B H9B 2.2056 no . .
H1B H13 3.3750 no . .
H2A H3 2.9104 no . .
H2A H4 2.3810 no . .
H2A H9A 2.5934 no . .
H2A H9B 3.4854 no . .
H2B H3 2.5021 no . .
H2B H4 3.4681 no . .
H2B H9A 3.5384 no . .
H2B H19C 3.2324 no . .
H3 H4 2.7849 no . .
H3 H5A 3.5073 no . .
H3 H5B 2.4371 no . .
H3 H9A 3.1260 no . .
H4 H5A 2.4175 no . .
H4 H5B 2.8881 no . .
H4 H6A 3.5122 no . .
H4 H6B 2.3870 no . .
H4 H9A 2.3114 no . .
H5A H6A 2.3382 no . .
H5A H6B 2.4981 no . .
H5A H21A 3.3921 no . .
H5B H6A 2.5101 no . .
H5B H6B 2.9014 no . .
H5B H10 2.9780 no . .
H6A H10 2.3137 no . .
H6B H9A 2.2053 no . .
H6B H9B 3.4248 no . .
H6B H10 3.4427 no . .
H9A H13 3.5356 no . .
H9B H13 2.5325 no . .
H10 H11 2.2725 no . .
H11 H12 2.3944 no . .
H12 H13 2.3383 no . .
H15 H19A 3.2393 no . .
H15 H19B 2.3680 no . .
H15 H19C 3.4158 no . .
H15 H20A 3.5284 no . .
H15 H20B 2.9953 no . .
H15 H20C 2.4462 no . .
H17 H20A 2.4486 no . .
H17 H20B 3.0811 no . .
H17 H20C 3.5167 no . .
H17 H21A 3.3497 no . .
H17 H21B 3.2909 no . .
H17 H21C 2.3435 no . .
H22A H23A 2.2965 no . .
H22A H23B 2.8554 no . .
H22A H24 2.6114 no . .
H22A H30A 2.8285 no . .
H22A H30B 2.5722 no . .
H22A H34 2.5279 no . .
H22B H23A 2.4129 no . .
H22B H23B 2.3062 no . .
H22B H30A 2.5713 no . .
H22B H30B 2.2028 no . .
H22B H34 3.4071 no . .
H23A H24 2.4917 no . .
H23A H25 3.4387 no . .
H23A H30A 3.5553 no . .
H23A H40B 3.4163 no . .
H23A H40C 3.4254 no . .
H23B H24 2.9038 no . .
H23B H25 2.3363 no . .
H23B H30A 2.6114 no . .
H23B H30B 3.5138 no . .
H24 H25 2.7961 no . .
H24 H26A 3.5809 no . .
H24 H26B 2.5351 no . .
H24 H30A 3.1667 no . .
H25 H26A 2.4131 no . .
H25 H26B 2.8898 no . .
H25 H27A 3.4960 no . .
H25 H27B 2.3691 no . .
H25 H30A 2.3385 no . .
H26A H27A 2.3146 no . .
H26A H27B 2.4798 no . .
H26A H42A 3.4428 no . .
H26B H27A 2.4993 no . .
H26B H27B 2.8889 no . .
H26B H31 3.0689 no . .
H27A H30A 3.5910 no . .
H27A H31 2.2819 no . .
H27B H30A 2.1605 no . .
H27B H30B 3.3923 no . .
H27B H31 3.4161 no . .
H30A H34 3.5441 no . .
H30B H34 2.5488 no . .
H31 H32 2.3279 no . .
H32 H33 2.3394 no . .
H33 H34 2.3288 no . .
H36 H40A 2.3533 no . .
H36 H40B 3.2764 no . .
H36 H40C 3.3739 no . .
H36 H41A 3.1302 no . .
H36 H41B 2.4300 no . .
H36 H41C 3.5013 no . .
H38 H41A 2.9289 no . .
H38 H41B 3.5541 no . .
H38 H41C 2.5164 no . .
H38 H42A 3.3869 no . .
H38 H42B 3.3302 no . .
H38 H42C 2.3876 no . .
Cl1 H20A 2.8944 no . 2_545
Cl1 H23A 3.0064 no . .
Cl1 H33 3.2195 no . 2_545
Cl1 H40C 2.9599 no . .
Cl2 H9B 3.2211 no . 2_656
Cl2 H10 2.8231 no . 1_565
Cl2 H32 3.3198 no . 2_555
Cl2 H42C 2.9358 no . 1_665
Cl3 H15 2.8028 no . 1_545
Cl3 H17 2.8533 no . 2_545
Cl3 H21C 3.2334 no . 2_545
Cl3 H22B 3.3665 no . 1_545
Cl3 H30B 3.3229 no . 1_545
Cl4 H4 3.5462 no . 1_455
Cl4 H6B 3.1108 no . 1_455
Cl4 H12 2.7703 no . 2_556
N1 H32 3.4195 no . 2_555
N2 H19B 3.4685 no . 1_545
C1 H6A 3.5926 no . 2_656
C1 H6B 3.4925 no . 2_656
C2 H9B 3.4513 no . 2_656
C2 H11 3.2135 no . 1_565
C5 H32 3.4108 no . 2_545
C5 H33 3.3826 no . 2_545
C6 H1B 2.8546 no . 2_646
C6 H42B 3.1081 no . 1_655
C7 H1B 2.9485 no . 2_646
C7 H2A 3.5511 no . 2_646
C7 H9A 3.5309 no . 2_646
C7 H9B 3.2318 no . 2_646
C8 H1B 3.3948 no . 2_646
C8 H2A 3.0013 no . 2_646
C8 H9A 3.5628 no . 2_646
C9 H2A 3.0748 no . 2_646
C10 H1B 3.4736 no . 2_646
C10 H9A 3.3279 no . 2_646
C10 H9B 2.7856 no . 2_646
C10 H19C 2.9940 no . 1_545
C10 H40A 3.4671 no . .
C11 H2A 3.5416 no . 1_545
C11 H2B 3.1932 no . 1_545
C11 H9A 3.1761 no . 2_646
C11 H9B 3.0774 no . 2_646
C11 H19C 2.9384 no . 1_545
C11 H36 2.8371 no . .
C11 H40A 3.2353 no . .
C12 H9A 3.1319 no . 2_646
C12 H36 2.9602 no . .
C12 H40A 3.3602 no . .
C12 H41A 3.1068 no . 2_556
C12 H41C 3.4963 no . 2_556
C13 H2A 3.3017 no . 2_646
C13 H4 3.5261 no . 2_646
C13 H9A 3.3160 no . 2_646
C13 H38 3.2948 no . 2_556
C13 H41A 3.1698 no . 2_556
C14 H22A 3.1691 no . .
C14 H22B 3.5126 no . .
C14 H32 3.4543 no . 2_555
C15 H22A 3.0608 no . .
C15 H22B 3.4529 no . .
C15 H34 3.5748 no . .
C16 H20B 3.4002 no . 2_545
C16 H34 3.4699 no . .
C17 H20B 3.2073 no . 2_545
C17 H20C 3.0178 no . 2_545
C17 H24 3.4220 no . 2_555
C18 H20B 3.4475 no . 2_545
C18 H20C 2.9386 no . 2_545
C18 H31 3.5698 no . 2_555
C18 H32 3.5127 no . 2_555
C19 H10 3.3410 no . 1_565
C19 H11 3.1736 no . 1_565
C19 H22A 3.4209 no . .
C19 H22B 3.1415 no . .
C19 H23A 3.4458 no . .
C20 H21A 3.4943 no . 2_555
C20 H22A 3.5168 no . 2_555
C20 H24 3.4075 no . 2_555
C20 H34 3.2343 no . .
C21 H20C 3.0284 no . 2_545
C21 H27A 3.5055 no . 1_655
C21 H27B 2.8638 no . 1_655
C21 H31 3.5635 no . 2_555
C21 H34 3.3728 no . 2_545
C22 H15 3.5383 no . .
C22 H19A 3.1678 no . .
C22 H19B 3.5954 no . .
C23 H19A 3.2192 no . .
C23 H38 3.4469 no . 1_565
C24 H17 3.5704 no . 2_545
C27 H21B 3.3293 no . 1_455
C27 H21C 3.1725 no . 1_455
C27 H30B 3.3228 no . 2_445
C28 H26A 3.0503 no . 2_455
C29 H20B 3.5327 no . 2_545
C29 H26A 3.1124 no . 2_455
C29 H27A 3.1812 no . 2_455
C30 H27A 3.0515 no . 2_455
C30 H42A 3.2983 no . 1_565
C30 H42C 3.5968 no . 1_565
C31 H17 3.5629 no . 2_545
C31 H26A 3.1567 no . 2_455
C31 H42A 3.2365 no . 2_455
C32 H5A 3.3381 no . 2_555
C32 H5B 3.4597 no . 2_555
C32 H26A 3.3549 no . 2_455
C32 H42B 3.5752 no . 2_455
C33 H5A 3.3347 no . 2_555
C33 H5B 3.3180 no . 2_555
C33 H20B 3.0701 no . 2_545
C33 H21A 3.2305 no . 2_555
C33 H26A 3.4098 no . 2_455
C34 H20B 2.9056 no . 2_545
C34 H20C 3.4635 no . .
C34 H21A 3.1601 no . 2_555
C34 H26A 3.2791 no . 2_455
C34 H27A 3.4651 no . 2_455
C35 H19B 2.9830 no . 1_545
C36 H11 3.2664 no . .
C36 H19A 3.5698 no . 1_545
C36 H19B 2.9798 no . 1_545
C36 H41A 3.5001 no . 2_556
C37 H1A 3.5621 no . 2_546
C37 H13 3.5791 no . 2_546
C37 H19A 3.4650 no . 1_545
C37 H19B 3.4094 no . 1_545
C38 H1A 3.4398 no . 2_546
C38 H13 3.0765 no . 2_546
C38 H22B 3.1257 no . 1_545
C38 H23B 3.0813 no . 1_545
C39 H22B 3.0597 no . 1_545
C40 H3 3.4729 no . .
C40 H19B 3.4501 no . 1_545
C40 H41A 3.2781 no . 2_556
C41 H12 3.3736 no . 2_546
C41 H13 3.4783 no . 2_546
C41 H36 3.5700 no . 2_546
C42 H6A 3.1565 no . 1_455
C42 H22B 3.4089 no . 1_545
C42 H30B 3.3311 no . 1_545
C42 H31 3.1757 no . 2_445
H1A C37 3.5621 no . 2_556
H1A C38 3.4398 no . 2_556
H1A H38 3.4724 no . 2_556
H1A H41A 3.3232 no . 2_556
H1B C6 2.8546 no . 2_656
H1B C7 2.9485 no . 2_656
H1B C8 3.3948 no . 2_656
H1B C10 3.4736 no . 2_656
H1B H6A 2.6701 no . 2_656
H1B H6B 2.5445 no . 2_656
H2A C7 3.5511 no . 2_656
H2A C8 3.0013 no . 2_656
H2A C9 3.0748 no . 2_656
H2A C11 3.5416 no . 1_565
H2A C13 3.3017 no . 2_656
H2A H9A 3.2657 no . 2_656
H2A H9B 2.5217 no . 2_656
H2A H11 3.1201 no . 1_565
H2A H13 3.4102 no . 2_656
H2B C11 3.1932 no . 1_565
H2B H11 2.4383 no . 1_565
H2B H41B 3.1436 no . 1_565
H3 C40 3.4729 no . .
H3 H40A 2.9463 no . .
H3 H40C 3.3344 no . .
H4 Cl4 3.5462 no . 1_655
H4 C13 3.5261 no . 2_656
H4 H13 3.3791 no . 2_656
H5A C32 3.3381 no . 2_545
H5A C33 3.3347 no . 2_545
H5A H25 3.4144 no . 1_655
H5A H26A 3.4431 no . 1_655
H5A H32 3.1239 no . 2_545
H5A H33 3.1155 no . 2_545
H5A H42B 3.1878 no . 1_655
H5B C32 3.4597 no . 2_545
H5B C33 3.3180 no . 2_545
H5B H32 3.0240 no . 2_545
H5B H33 2.7355 no . 2_545
H6A C1 3.5926 no . 2_646
H6A C42 3.1565 no . 1_655
H6A H1B 2.6701 no . 2_646
H6A H9B 3.3178 no . 2_646
H6A H32 3.1504 no . 2_545
H6A H42B 2.2883 no . 1_655
H6A H42C 3.2860 no . 1_655
H6B Cl4 3.1108 no . 1_655
H6B C1 3.4925 no . 2_646
H6B H1B 2.5445 no . 2_646
H6B H42B 3.2353 no . 1_655
H9A C7 3.5309 no . 2_656
H9A C8 3.5628 no . 2_656
H9A C10 3.3279 no . 2_656
H9A C11 3.1761 no . 2_656
H9A C12 3.1319 no . 2_656
H9A C13 3.3160 no . 2_656
H9A H2A 3.2657 no . 2_646
H9A H12 3.5082 no . 2_656
H9B Cl2 3.2211 no . 2_646
H9B C2 3.4513 no . 2_646
H9B C7 3.2318 no . 2_656
H9B C10 2.7856 no . 2_656
H9B C11 3.0774 no . 2_656
H9B H2A 2.5217 no . 2_646
H9B H6A 3.3178 no . 2_656
H9B H10 2.8671 no . 2_656
H9B H11 3.3773 no . 2_656
H10 Cl2 2.8231 no . 1_545
H10 C19 3.3410 no . 1_545
H10 H9B 2.8671 no . 2_646
H10 H19B 3.5686 no . 1_545
H10 H19C 2.4646 no . 1_545
H10 H32 3.3101 no . 2_545
H11 C2 3.2135 no . 1_545
H11 C19 3.1736 no . 1_545
H11 C36 3.2664 no . .
H11 H2A 3.1201 no . 1_545
H11 H2B 2.4383 no . 1_545
H11 H9B 3.3773 no . 2_646
H11 H19A 3.4255 no . 1_545
H11 H19B 3.3466 no . 1_545
H11 H19C 2.3587 no . 1_545
H11 H36 2.5452 no . .
H11 H40A 3.5125 no . .
H11 H41B 3.0396 no . .
H12 Cl4 2.7703 no . 2_546
H12 C41 3.3736 no . 2_556
H12 H9A 3.5082 no . 2_646
H12 H36 2.8266 no . .
H12 H41A 2.9379 no . 2_556
H12 H41C 2.9093 no . 2_556
H13 C37 3.5791 no . 2_556
H13 C38 3.0765 no . 2_556
H13 C41 3.4783 no . 2_556
H13 H2A 3.4102 no . 2_646
H13 H4 3.3791 no . 2_646
H13 H38 2.4172 no . 2_556
H13 H41A 3.0168 no . 2_556
H13 H41C 3.3914 no . 2_556
H15 Cl3 2.8028 no . 1_565
H15 C22 3.5383 no . .
H15 H22A 3.0668 no . .
H15 H22B 3.0829 no . .
H15 H34 3.4224 no . .
H17 Cl3 2.8533 no . 2_555
H17 C24 3.5704 no . 2_555
H17 C31 3.5629 no . 2_555
H17 H20B 3.4429 no . 2_545
H17 H20C 3.0237 no . 2_545
H17 H24 2.6430 no . 2_555
H17 H26B 2.9544 no . 2_555
H19A C22 3.1678 no . .
H19A C23 3.2192 no . .
H19A C36 3.5698 no . 1_565
H19A C37 3.4650 no . 1_565
H19A H11 3.4255 no . 1_565
H19A H22A 3.0271 no . .
H19A H22B 2.7643 no . .
H19A H23A 2.5431 no . .
H19A H23B 3.5818 no . .
H19A H41B 3.4990 no . 1_565
H19A H41C 3.5244 no . 1_565
H19B N2 3.4685 no . 1_565
H19B C22 3.5954 no . .
H19B C35 2.9830 no . 1_565
H19B C36 2.9798 no . 1_565
H19B C37 3.4094 no . 1_565
H19B C40 3.4501 no . 1_565
H19B H10 3.5686 no . 1_565
H19B H11 3.3466 no . 1_565
H19B H22A 3.5093 no . .
H19B H22B 2.8547 no . .
H19B H36 3.2404 no . 1_565
H19B H40A 3.5189 no . 1_565
H19B H40C 3.2052 no . 1_565
H19C C10 2.9940 no . 1_565
H19C C11 2.9384 no . 1_565
H19C H10 2.4646 no . 1_565
H19C H11 2.3587 no . 1_565
H19C H36 3.4791 no . 1_565
H20A Cl1 2.8944 no . 2_555
H20A H21A 3.4161 no . 2_555
H20A H22A 3.3622 no . 2_555
H20A H24 2.8582 no . 2_555
H20A H33 3.3639 no . .
H20A H34 3.3279 no . .
H20B C16 3.4002 no . 2_555
H20B C17 3.2073 no . 2_555
H20B C18 3.4475 no . 2_555
H20B C29 3.5327 no . 2_555
H20B C33 3.0701 no . 2_555
H20B C34 2.9056 no . 2_555
H20B H17 3.4429 no . 2_555
H20B H22A 2.7915 no . 2_555
H20B H24 3.2430 no . 2_555
H20B H33 3.2085 no . 2_555
H20B H34 2.9368 no . 2_555
H20C C17 3.0178 no . 2_555
H20C C18 2.9386 no . 2_555
H20C C21 3.0284 no . 2_555
H20C C34 3.4635 no . .
H20C H17 3.0237 no . 2_555
H20C H21A 2.7446 no . 2_555
H20C H21C 2.9395 no . 2_555
H20C H33 3.5988 no . .
H20C H34 2.5799 no . .
H21A C20 3.4943 no . 2_545
H21A C33 3.2305 no . 2_545
H21A C34 3.1601 no . 2_545
H21A H20A 3.4161 no . 2_545
H21A H20C 2.7446 no . 2_545
H21A H27B 3.2119 no . 1_655
H21A H33 2.9224 no . 2_545
H21A H34 2.7776 no . 2_545
H21B C27 3.3293 no . 1_655
H21B H25 3.3786 no . 1_655
H21B H27A 3.4846 no . 1_655
H21B H27B 2.4268 no . 1_655
H21B H30A 3.3812 no . 1_655
H21B H31 3.0323 no . 2_555
H21C Cl3 3.2334 no . 2_555
H21C C27 3.1725 no . 1_655
H21C H20C 2.9395 no . 2_545
H21C H26B 2.8863 no . 2_555
H21C H27A 2.8768 no . 1_655
H21C H27B 2.5491 no . 1_655
H21C H34 3.0757 no . 2_545
H22A C14 3.1691 no . .
H22A C15 3.0608 no . .
H22A C19 3.4209 no . .
H22A C20 3.5168 no . 2_545
H22A H15 3.0668 no . .
H22A H19A 3.0271 no . .
H22A H19B 3.5093 no . .
H22A H20A 3.3622 no . 2_545
H22A H20B 2.7915 no . 2_545
H22B Cl3 3.3665 no . 1_565
H22B C14 3.5126 no . .
H22B C15 3.4529 no . .
H22B C19 3.1415 no . .
H22B C38 3.1257 no . 1_565
H22B C39 3.0597 no . 1_565
H22B C42 3.4089 no . 1_565
H22B H15 3.0829 no . .
H22B H19A 2.7643 no . .
H22B H19B 2.8547 no . .
H22B H38 3.2832 no . 1_565
H22B H42A 3.1062 no . 1_565
H22B H42C 3.4623 no . 1_565
H23A Cl1 3.0064 no . .
H23A C19 3.4458 no . .
H23A H19A 2.5431 no . .
H23A H41C 3.2586 no . 1_565
H23B C38 3.0813 no . 1_565
H23B H19A 3.5818 no . .
H23B H38 2.5974 no . 1_565
H23B H41C 3.0823 no . 1_565
H23B H42C 3.5654 no . 1_565
H24 C17 3.4220 no . 2_545
H24 C20 3.4075 no . 2_545
H24 H17 2.6430 no . 2_545
H24 H20A 2.8582 no . 2_545
H24 H20B 3.2430 no . 2_545
H25 H5A 3.4144 no . 1_455
H25 H21B 3.3786 no . 1_455
H26A C28 3.0503 no . 2_445
H26A C29 3.1124 no . 2_445
H26A C31 3.1567 no . 2_445
H26A C32 3.3549 no . 2_445
H26A C33 3.4098 no . 2_445
H26A C34 3.2791 no . 2_445
H26A H5A 3.4431 no . 1_455
H26B H17 2.9544 no . 2_545
H26B H21C 2.8863 no . 2_545
H26B H27A 3.5255 no . 2_445
H26B H27B 3.3152 no . 2_445
H27A C21 3.5055 no . 1_455
H27A C29 3.1812 no . 2_445
H27A C30 3.0515 no . 2_445
H27A C34 3.4651 no . 2_445
H27A H21B 3.4846 no . 1_455
H27A H21C 2.8768 no . 1_455
H27A H26B 3.5255 no . 2_455
H27A H30A 3.2760 no . 2_445
H27A H30B 2.3407 no . 2_445
H27A H34 3.4974 no . 2_445
H27A H42A 3.4326 no . 2_455
H27B C21 2.8638 no . 1_455
H27B H21A 3.2119 no . 1_455
H27B H21B 2.4268 no . 1_455
H27B H21C 2.5491 no . 1_455
H27B H26B 3.3152 no . 2_455
H30A H21B 3.3812 no . 1_455
H30A H27A 3.2760 no . 2_455
H30A H31 3.2386 no . 2_455
H30A H42A 3.2670 no . 1_565
H30A H42C 3.1492 no . 1_565
H30B Cl3 3.3229 no . 1_565
H30B C27 3.3228 no . 2_455
H30B C42 3.3311 no . 1_565
H30B H27A 2.3407 no . 2_455
H30B H31 3.0813 no . 2_455
H30B H42A 2.6134 no . 1_565
H30B H42C 3.2992 no . 1_565
H31 C18 3.5698 no . 2_545
H31 C21 3.5635 no . 2_545
H31 C42 3.1757 no . 2_455
H31 H21B 3.0323 no . 2_545
H31 H30A 3.2386 no . 2_445
H31 H30B 3.0813 no . 2_445
H31 H42A 2.7244 no . 2_455
H31 H42B 3.3560 no . 2_455
H31 H42C 2.9506 no . 2_455
H32 Cl2 3.3198 no . 2_545
H32 N1 3.4195 no . 2_545
H32 C5 3.4108 no . 2_555
H32 C14 3.4543 no . 2_545
H32 C18 3.5127 no . 2_545
H32 H5A 3.1239 no . 2_555
H32 H5B 3.0240 no . 2_555
H32 H6A 3.1504 no . 2_555
H32 H10 3.3101 no . 2_555
H32 H42B 3.1972 no . 2_455
H32 H42C 3.4402 no . 2_455
H33 Cl1 3.2195 no . 2_555
H33 C5 3.3826 no . 2_555
H33 H5A 3.1155 no . 2_555
H33 H5B 2.7355 no . 2_555
H33 H20A 3.3639 no . .
H33 H20B 3.2085 no . 2_545
H33 H20C 3.5988 no . .
H33 H21A 2.9224 no . 2_555
H34 C15 3.5748 no . .
H34 C16 3.4699 no . .
H34 C20 3.2343 no . .
H34 C21 3.3728 no . 2_555
H34 H15 3.4224 no . .
H34 H20A 3.3279 no . .
H34 H20B 2.9368 no . 2_545
H34 H20C 2.5799 no . .
H34 H21A 2.7776 no . 2_555
H34 H21C 3.0757 no . 2_555
H34 H27A 3.4974 no . 2_455
H36 C11 2.8371 no . .
H36 C12 2.9602 no . .
H36 C41 3.5700 no . 2_556
H36 H11 2.5452 no . .
H36 H12 2.8266 no . .
H36 H19B 3.2404 no . 1_545
H36 H19C 3.4791 no . 1_545
H36 H41A 2.9687 no . 2_556
H36 H41C 3.5483 no . 2_556
H38 C13 3.2948 no . 2_546
H38 C23 3.4469 no . 1_545
H38 H1A 3.4724 no . 2_546
H38 H13 2.4172 no . 2_546
H38 H22B 3.2832 no . 1_545
H38 H23B 2.5974 no . 1_545
H40A C10 3.4671 no . .
H40A C11 3.2353 no . .
H40A C12 3.3602 no . .
H40A H3 2.9463 no . .
H40A H11 3.5125 no . .
H40A H19B 3.5189 no . 1_545
H40A H41A 2.7679 no . 2_556
H40B H41A 3.1025 no . 2_556
H40B H41C 3.4357 no . 1_565
H40C Cl1 2.9599 no . .
H40C H3 3.3344 no . .
H40C H19B 3.2052 no . 1_545
H41A C12 3.1068 no . 2_546
H41A C13 3.1698 no . 2_546
H41A C36 3.5001 no . 2_546
H41A C40 3.2781 no . 2_546
H41A H1A 3.3232 no . 2_546
H41A H12 2.9379 no . 2_546
H41A H13 3.0168 no . 2_546
H41A H36 2.9687 no . 2_546
H41A H40A 2.7679 no . 2_546
H41A H40B 3.1025 no . 2_546
H41B H2B 3.1436 no . 1_545
H41B H11 3.0396 no . .
H41B H19A 3.4990 no . 1_545
H41C C12 3.4963 no . 2_546
H41C H12 2.9093 no . 2_546
H41C H13 3.3914 no . 2_546
H41C H19A 3.5244 no . 1_545
H41C H23A 3.2586 no . 1_545
H41C H23B 3.0823 no . 1_545
H41C H36 3.5483 no . 2_546
H41C H40B 3.4357 no . 1_545
H42A C30 3.2983 no . 1_545
H42A C31 3.2365 no . 2_445
H42A H22B 3.1062 no . 1_545
H42A H27A 3.4326 no . 2_445
H42A H30A 3.2670 no . 1_545
H42A H30B 2.6134 no . 1_545
H42A H31 2.7244 no . 2_445
H42B C6 3.1081 no . 1_455
H42B C32 3.5752 no . 2_445
H42B H5A 3.1878 no . 1_455
H42B H6A 2.2883 no . 1_455
H42B H6B 3.2353 no . 1_455
H42B H31 3.3560 no . 2_445
H42B H32 3.1972 no . 2_445
H42C Cl2 2.9358 no . 1_445
H42C C30 3.5968 no . 1_545
H42C H6A 3.2860 no . 1_455
H42C H22B 3.4623 no . 1_545
H42C H23B 3.5654 no . 1_545
H42C H30A 3.1492 no . 1_545
H42C H30B 3.2992 no . 1_545
H42C H31 2.9506 no . 2_445
H42C H32 3.4402 no . 2_445

#==============================================================================

#==============================================================================
# Additional structures and associated data_? identifiers
# should be added at this point if there is more than one 
# structure analysis in the CIF.


_shelxl_res_file
;

    shelxl.res created by SHELXL-2014/7

TITL KM204
CELL  0.71075 12.35870 9.50730 18.69660 90.00000 105.04400 90.00000
ZERR  4 0.00230 0.00150 0.00340 0.00000 0.00290 0.00000
LATT -1
SYMM    -X, .50+Y,    -Z
SFAC C H CL N PT
UNIT 84 108 8 4 4
L.S. 20
FMAP 2
PLAN -25
WPDB -2
HTAB
BOND $H
CONF
LIST 4
TEMP -149.8
ACTA
SIZE 0.150 0.150 0.070
WGHT    0.000000
FVAR       0.85432
PT1   5    0.266483    1.169012    0.254840    11.00000    0.01706    0.01763 =
         0.01632    0.00292    0.00112   -0.00270
PT2   5   -0.234000    0.836888    0.226058    11.00000    0.02304    0.02299 =
         0.01831   -0.00357    0.01018   -0.00313
CL1   3    0.117800    1.016820    0.215890    11.00000    0.02182    0.02917 =
         0.02301    0.00439   -0.00192   -0.00983
CL2   3    0.411214    1.329342    0.282965    11.00000    0.02322    0.02166 =
         0.02856    0.00275    0.00092   -0.00771
CL3   3   -0.185146    0.707007    0.134986    11.00000    0.04009    0.02370 =
         0.02334    0.00164    0.01780    0.00600
CL4   3   -0.281065    0.949103    0.322848    11.00000    0.04548    0.03952 =
         0.02736   -0.01221    0.02039   -0.00590
N1    4    0.188111    1.299910    0.168655    11.00000    0.01205    0.01473 =
         0.01720   -0.00382    0.00025    0.00064
N2    4   -0.178995    0.668701    0.296654    11.00000    0.02721    0.02553 =
         0.01547   -0.00528    0.01482   -0.01244
C1    1    0.355141    1.060585    0.497681    11.00000    0.04780    0.02523 =
         0.02363   -0.00912   -0.00824   -0.01081
AFIX  23
H1A   2    0.285058    1.016398    0.502904    11.00000   -1.20000
H1B   2    0.383680    1.121907    0.541302    11.00000   -1.20000
AFIX   0
C2    1    0.327953    1.151621    0.428249    11.00000    0.04079    0.01508 =
         0.01846   -0.00419    0.00066   -0.00801
AFIX  23
H2A   2    0.392676    1.212962    0.428230    11.00000   -1.20000
H2B   2    0.262864    1.212499    0.427995    11.00000   -1.20000
AFIX   0
C3    1    0.301292    1.059400    0.359177    11.00000    0.02460    0.01621 =
         0.01666    0.00108   -0.00347    0.00303
AFIX  13
H3    2    0.246195    0.983027    0.360469    11.00000   -1.20000
AFIX   0
C4    1    0.381159    1.020721    0.323436    11.00000    0.02477    0.02059 =
         0.01690    0.00684   -0.00301    0.00009
AFIX  13
H4    2    0.456762    1.061609    0.346369    11.00000   -1.20000
AFIX   0
C5    1    0.386004    0.879905    0.290233    11.00000    0.03295    0.02963 =
         0.02351    0.00632    0.00899    0.00530
AFIX  23
H5A   2    0.423223    0.886349    0.249412    11.00000   -1.20000
H5B   2    0.309335    0.842736    0.269925    11.00000   -1.20000
AFIX   0
C6    1    0.454057    0.779990    0.352631    11.00000    0.02821    0.03558 =
         0.02913    0.00458    0.01335    0.00037
AFIX  23
H6A   2    0.476953    0.695245    0.329483    11.00000   -1.20000
H6B   2    0.522950    0.828894    0.380303    11.00000   -1.20000
AFIX   0
C7    1    0.387070    0.734795    0.406768    11.00000    0.00876    0.02529 =
         0.01846    0.00984    0.00301    0.00497
C8    1    0.385640    0.801986    0.472961    11.00000    0.02163    0.01499 =
         0.01409   -0.00271   -0.00147    0.00257
C9    1    0.441784    0.944279    0.498161    11.00000    0.03023    0.02875 =
         0.01210    0.00665   -0.00677   -0.00879
AFIX  23
H9A   2    0.488792    0.971543    0.464861    11.00000   -1.20000
H9B   2    0.491362    0.934603    0.548833    11.00000   -1.20000
AFIX   0
C10   1    0.327094    0.608678    0.389510    11.00000    0.02520    0.02251 =
         0.01709   -0.00256    0.00578    0.00497
AFIX  43
H10   2    0.326801    0.563441    0.344153    11.00000   -1.20000
AFIX   0
C11   1    0.269956    0.548144    0.433555    11.00000    0.02641    0.02041 =
         0.02809    0.00091    0.00943   -0.00273
AFIX  43
H11   2    0.227702    0.465024    0.418073    11.00000   -1.20000
AFIX   0
C12   1    0.273263    0.609306    0.503242    11.00000    0.02446    0.02498 =
         0.01972    0.01272    0.00626   -0.00126
AFIX  43
H12   2    0.237531    0.566178    0.536867    11.00000   -1.20000
AFIX   0
C13   1    0.331354    0.735560    0.520066    11.00000    0.03297    0.03382 =
         0.01378   -0.00142    0.00536    0.00211
AFIX  43
H13   2    0.334037    0.778714    0.566323    11.00000   -1.20000
AFIX   0
C14   1    0.110783    1.396191    0.176701    11.00000    0.01307    0.02016 =
         0.02332   -0.00180    0.00524   -0.00018
C15   1    0.052721    1.476675    0.117867    11.00000    0.01650    0.02401 =
         0.02812    0.00207    0.00118    0.00352
AFIX  43
H15   2   -0.001730    1.542011    0.124949    11.00000   -1.20000
AFIX   0
C16   1    0.072693    1.463633    0.048234    11.00000    0.01600    0.02482 =
         0.02513    0.00377    0.00169   -0.00629
C17   1    0.151515    1.365651    0.041374    11.00000    0.02157    0.02437 =
         0.01471   -0.00026    0.00588   -0.00525
AFIX  43
H17   2    0.166855    1.353612   -0.005476    11.00000   -1.20000
AFIX   0
C18   1    0.209003    1.284330    0.100203    11.00000    0.01711    0.01507 =
         0.02656   -0.00046    0.00566   -0.00232
C19   1    0.088284    1.408959    0.252446    11.00000    0.02394    0.04449 =
         0.02346   -0.01131    0.00886    0.00348
AFIX 137
H19A  2    0.050066    1.324020    0.262821    11.00000   -1.20000
H19B  2    0.040810    1.491207    0.253233    11.00000   -1.20000
H19C  2    0.159445    1.419896    0.290209    11.00000   -1.20000
AFIX   0
C20   1    0.009515    1.551091   -0.014883    11.00000    0.03412    0.03271 =
         0.03843    0.00899    0.00321    0.00234
AFIX 137
H20A  2    0.004639    1.501236   -0.061491    11.00000   -1.20000
H20B  2    0.048429    1.640823   -0.015159    11.00000   -1.20000
H20C  2   -0.066122    1.568799   -0.009556    11.00000   -1.20000
AFIX   0
C21   1    0.293816    1.179499    0.092665    11.00000    0.02262    0.03648 =
         0.02418    0.00525    0.01167    0.01191
AFIX 137
H21A  2    0.273316    1.086910    0.108107    11.00000   -1.20000
H21B  2    0.367318    1.206944    0.124014    11.00000   -1.20000
H21C  2    0.296997    1.175200    0.040879    11.00000   -1.20000
AFIX   0
C22   1   -0.189662    1.279380    0.152603    11.00000    0.02972    0.01634 =
         0.03666   -0.01086    0.00032    0.00168
AFIX  23
H22A  2   -0.133836    1.268473    0.123412    11.00000   -1.20000
H22B  2   -0.169672    1.365037    0.183304    11.00000   -1.20000
AFIX   0
C23   1   -0.180784    1.153090    0.203838    11.00000    0.01895    0.02606 =
         0.03026    0.00155    0.00236   -0.00440
AFIX  23
H23A  2   -0.101182    1.136149    0.229637    11.00000   -1.20000
H23B  2   -0.221832    1.172684    0.241716    11.00000   -1.20000
AFIX   0
C24   1   -0.229106    1.024081    0.160251    11.00000    0.02485    0.01734 =
         0.00984    0.00102    0.00754    0.00282
AFIX  13
H24   2   -0.200740    1.007053    0.115542    11.00000   -1.20000
AFIX   0
C25   1   -0.340130    0.982761    0.151857    11.00000    0.02848    0.02178 =
         0.01739    0.00027    0.00720   -0.00701
AFIX  13
H25   2   -0.380405    1.047230    0.178488    11.00000   -1.20000
AFIX   0
C26   1   -0.416608    0.925224    0.082152    11.00000    0.02210    0.02605 =
         0.04269   -0.00472   -0.00184   -0.00544
AFIX  23
H26A  2   -0.476733    0.868386    0.094092    11.00000   -1.20000
H26B  2   -0.374032    0.864241    0.056238    11.00000   -1.20000
AFIX   0
C27   1   -0.468374    1.052048    0.031767    11.00000    0.01896    0.03412 =
         0.04262   -0.01158   -0.00778   -0.00153
AFIX  23
H27A  2   -0.534826    1.018063   -0.006199    11.00000   -1.20000
H27B  2   -0.494799    1.122150    0.062567    11.00000   -1.20000
AFIX   0
C28   1   -0.392467    1.124226   -0.006597    11.00000    0.02076    0.01979 =
         0.02259   -0.00044    0.00116    0.00399
C29   1   -0.321696    1.236585    0.022118    11.00000    0.02046    0.02054 =
         0.01995   -0.00571    0.00125    0.00938
C30   1   -0.306228    1.301548    0.098445    11.00000    0.02934    0.02174 =
         0.03168   -0.00167   -0.00472    0.00563
AFIX  23
H30A  2   -0.363531    1.261690    0.121093    11.00000   -1.20000
H30B  2   -0.320399    1.403899    0.092379    11.00000   -1.20000
AFIX   0
C31   1   -0.396001    1.077553   -0.077992    11.00000    0.02773    0.02110 =
         0.03315   -0.00103   -0.00548    0.00549
AFIX  43
H31   2   -0.443886    1.000940   -0.097595    11.00000   -1.20000
AFIX   0
C32   1   -0.332977    1.137498   -0.121915    11.00000    0.04009    0.04330 =
         0.02089    0.00630    0.00269    0.01702
AFIX  43
H32   2   -0.338038    1.102717   -0.170308    11.00000   -1.20000
AFIX   0
C33   1   -0.263158    1.248268   -0.093719    11.00000    0.02950    0.03655 =
         0.04358    0.01808    0.00662    0.00821
AFIX  43
H33   2   -0.219142    1.290803   -0.122561    11.00000   -1.20000
AFIX   0
C34   1   -0.257399    1.297547   -0.022834    11.00000    0.03636    0.02469 =
         0.02717    0.00838    0.00444   -0.00396
AFIX  43
H34   2   -0.209108    1.374164   -0.003889    11.00000   -1.20000
AFIX   0
C35   1   -0.073564    0.668259    0.343235    11.00000    0.02607    0.03431 =
         0.02759   -0.00216    0.01363   -0.00914
C36   1   -0.035283    0.555126    0.388452    11.00000    0.02358    0.04073 =
         0.03233    0.00621    0.01905    0.00007
AFIX  43
H36   2    0.036742    0.559349    0.422333    11.00000   -1.20000
AFIX   0
C37   1   -0.099300    0.435831    0.385586    11.00000    0.04447    0.03259 =
         0.03311    0.00964    0.03412    0.00234
C38   1   -0.204697    0.437852    0.338783    11.00000    0.04391    0.03171 =
         0.02921    0.00206    0.01400   -0.01174
AFIX  43
H38   2   -0.251768    0.358164    0.336783    11.00000   -1.20000
AFIX   0
C39   1   -0.245166    0.553930    0.293769    11.00000    0.02923    0.03689 =
         0.02180   -0.00136    0.01608   -0.00792
C40   1   -0.000562    0.795712    0.342978    11.00000    0.02671    0.03622 =
         0.04037    0.01118    0.00203   -0.00988
AFIX 137
H40A  2    0.074269    0.778690    0.375582    11.00000   -1.20000
H40B  2   -0.033951    0.877809    0.360709    11.00000   -1.20000
H40C  2    0.005328    0.813274    0.292476    11.00000   -1.20000
AFIX   0
C41   1   -0.054424    0.305993    0.431103    11.00000    0.05669    0.05012 =
         0.06562    0.03436    0.03599    0.01347
AFIX 137
H41A  2   -0.082099    0.304186    0.475695    11.00000   -1.20000
H41B  2    0.027658    0.308647    0.445412    11.00000   -1.20000
H41C  2   -0.079899    0.221438    0.401547    11.00000   -1.20000
AFIX   0
C42   1   -0.361530    0.558134    0.243131    11.00000    0.03675    0.04180 =
         0.02401   -0.00278    0.01314   -0.01955
AFIX 137
H42A  2   -0.357404    0.576296    0.192311    11.00000   -1.20000
H42B  2   -0.404448    0.633221    0.258984    11.00000   -1.20000
H42C  2   -0.398605    0.467627    0.245085    11.00000   -1.20000
AFIX   0
HKLF 4
 
REM  KM204
REM R1 =  0.0295 for    7476 Fo > 4sig(Fo)  and  0.0375 for all    9300 data
REM    457 parameters refined using      1 restraints
 
END  
     
WGHT      0.0000      0.0000 

REM Instructions for potential hydrogen bonds
EQIV $1 x, y+1, z
HTAB C15 Cl3_$1
EQIV $2 -x, y+1/2, -z
HTAB C17 Cl3_$2
HTAB C40 Cl1
HTAB C42 Cl3
EQIV $3 x-1, y-1, z
HTAB C42 Cl2_$3

REM Highest difference peak  1.384,  deepest hole -0.817,  1-sigma level  0.137
Q1    1  -0.3004  0.8416  0.2647  11.00000  0.05    1.38
Q2    1  -0.2338  0.8399  0.2825  11.00000  0.05    1.32
Q3    1   0.2099  1.1666  0.2959  11.00000  0.05    1.13
Q4    1   0.2690  1.1666  0.1998  11.00000  0.05    1.09
Q5    1  -0.2333  0.5008  0.2243  11.00000  0.05    1.07
Q6    1   0.2602  1.5122  0.2521  11.00000  0.05    1.06
Q7    1   0.2149  1.1677  0.2370  11.00000  0.05    0.99
Q8    1   0.2321  1.2740  0.1992  11.00000  0.05    0.62
Q9    1  -0.2920  0.8440  0.3213  11.00000  0.05    0.62
Q10   1  -0.3013  0.4947  0.2637  11.00000  0.05    0.61
Q11   1   0.2009  0.8343  0.4064  11.00000  0.05    0.61
Q12   1  -0.2036  0.8891  0.1668  11.00000  0.05    0.60
Q13   1   0.2011  1.5084  0.2899  11.00000  0.05    0.60
Q14   1   0.2728  1.0950  0.3130  11.00000  0.05    0.59
Q15   1   0.2136  1.0289  0.3440  11.00000  0.05    0.58
Q16   1   0.1709  0.5225  0.4058  11.00000  0.05    0.55
Q17   1  -0.1924  0.7384  0.2866  11.00000  0.05    0.54
Q18   1  -0.0774  1.7621  0.0853  11.00000  0.05    0.53
Q19   1  -0.3785  0.6737  0.2141  11.00000  0.05    0.53
Q20   1  -0.0215  1.6666  0.0888  11.00000  0.05    0.53
Q21   1   0.2392  1.0534  0.2022  11.00000  0.05    0.52
Q22   1   0.9772  0.1998  0.3234  11.00000  0.05    0.52
Q23   1  -0.1661  1.1769  0.0755  11.00000  0.05    0.52
Q24   1   0.1825  1.1651  0.4067  11.00000  0.05    0.51
Q25   1   0.2636  1.2459  0.3081  11.00000  0.05    0.50
;

_shelxl_hkl_file
;
   0  -1  -2  237.22  112.87
   0   1   2  727.35   93.78
   0   1  -2  657.29   98.75
   0   1  -2  724.81   91.79
   0  -1  -2  308.52  135.13
   0  -1   2  273.82   79.71
   0   1   2  634.78   92.14
  -1  -1  -1 4990.14  215.22
   1   1   1 5151.87  267.38
  -1   1  -1 4753.87  201.75
   1   1   1 4690.92  212.32
  -1   1  -1 4721.52  215.15
   1  -1   1 4991.83  229.29
  -1  -1  -1 4934.26  231.25
   1   0   2   97.42   78.34
  -1   0  -2  115.66   61.26
  -1   0  -2  107.40   70.38
   1   0  -3   61.89   62.93
  -1   0   3   34.91   69.79
   0   0   3  403.75  123.64
   0   0  -3  358.09   65.38
  -2   0  -1 2782.54  326.14
   2   0   1 2889.65  269.08
  -2   0  -1 2694.56  320.40
   2   0   1 2817.93  269.24
   1  -1  -313095.50  535.02
   1   1  -313125.11  526.70
  -1   1   314449.76  609.93
  -1  -1   312995.86  541.91
   0   1   321770.24  874.08
  -2  -1   0 3948.46  189.43
   2   1   0 3911.39  179.14
  -2  -1   0 4487.63  207.89
   2   1   0 3468.02  175.00
  -2   1   0 3609.19  174.58
   2  -1   0 4188.05  253.05
  -2  -1   2  233.38   48.59
   2  -1  -2  240.17   80.71
  -2   1   2  264.02   54.15
  -2  -1   2  199.62   51.45
   2   1  -2  351.86  103.99
   2   1  -2  309.15  144.45
  -1   0  -3 2044.26  251.06
  -1   0  -3 1925.04  239.61
   1   0   3 1884.60  249.22
   0   2   010194.87  427.64
   0  -2   0 9925.51  403.20
   0  -2   010519.63  437.99
   1   0  -4 1114.32  177.96
  -1   0   4 1049.04  166.21
  -2  -1  -119563.32  773.52
   2   1   117456.51  705.28
   0   2   1  856.58  125.78
   0   2  -1  756.94  151.86
   0  -2   1  930.74  121.62
   0   2   1  796.38  124.12
   0  -2  -1  899.08  121.63
   0  -2   1  914.20  137.51
   0   2  -1  808.09  127.24
   0  -2  -1  878.63  132.62
  -1  -2   0 1047.89  159.24
   1  -2   0 1128.93  146.06
  -1   2   0 1337.56  167.27
  -1   2   0 1113.90  142.31
   1   2   0 1362.88  192.16
  -1   2   0 1344.83  168.66
  -1  -2   0 1312.78  177.30
   1   2   0 1315.88  166.53
  -2  -1   3 8179.54  343.37
  -2   1   3 8713.12  420.58
  -2   1   3 7307.33  321.59
   2   1  -3 7851.48  324.12
   1   1   3  257.61  207.01
   1  -1   3  187.93   67.96
   1   1   3  316.78  195.82
  -1   1  -3  206.56   45.12
  -1  -1  -3  188.78  176.76
  -1  -1  -3  214.32   96.49
   0   2  -2 9133.26  390.61
   0  -2   2 8034.81  354.31
   0   2   2 9133.17  405.21
   0  -2  -2 7546.34  349.04
   0   2   2 9386.74  407.36
   0  -2  -2 7650.89  331.26
   1   2  -2  720.00   90.04
  -1  -2   2 1621.03  215.20
   1  -2  -2 1575.93  198.58
   1   2  -2  778.98  121.07
  -1  -2   2 1517.10  181.54
  -1   2   2  960.20  140.43
   1  -2  -2 1591.13  195.96
  -1   2   2  816.61  108.84
   3   0  -1  786.71   98.48
  -3   0   1  652.54  104.90
  -3   0   1  737.63   96.48
   3   0  -1  755.22  139.68
   0  -1  -4 1588.18  207.29
   0  -1   4 1620.96  203.54
   0   1   4 2206.49  281.97
   0   1   4 2308.76  278.19
   0   1  -4 2378.99  281.68
   0  -1  -4 1627.86  225.23
   3   0  -2 9260.72  402.43
  -3   0   2 8433.26  368.73
  -3   0   2 6831.41  277.03
  -2   1  -2 5851.68  307.04
   2   1   2 5698.91  292.16
  -2  -1  -2 5234.32  245.88
   2   1   2 4781.69  242.38
   2  -1   2 4934.69  235.42
  -2  -1  -2 5690.09  276.43
  -3   0   0 3026.07  181.46
   3   0   0 2862.86  263.32
  -3   0   0 2863.08  265.97
   3   0   0 3729.78  198.69
   1   0   412126.43  512.77
  -1   0  -411835.94  498.76
  -1  -2  -2 1953.55  245.95
   1   2   2 2394.09  314.16
   1  -2   2 2163.40  268.51
  -1   2  -2 1829.30  243.37
  -1  -2  -2 1503.45  201.55
  -1   2  -2 2098.78  262.44
   1   2   2 1919.43  287.33
   1  -2   2 2034.58  242.94
  -2   1   4 8256.04  369.06
  -2  -1   4 8291.18  353.39
   2  -1  -4 8455.70  350.97
   2   1  -4 8335.86  356.24
   2   1  -4 9025.26  386.71
  -3   0   3   43.35   36.83
   3   0  -3   19.32   49.50
  -3   0   3   36.59   67.41
   3   0  -3   23.26   64.44
   3   1  -1 5085.61  246.35
  -3   1   1 4994.51  245.16
  -3   1   1 5268.55  214.20
  -2   0  -3 6715.77  386.83
   2   0   3 7006.29  323.85
  -2   0  -3 6158.35  282.15
  -1  -2   316516.44  682.94
  -1   2   315072.00  628.37
   1   2  -315909.85  643.92
   1  -2  -314988.66  623.20
   1  -2  -314970.62  596.59
   0  -2   3 2881.99  276.49
   0  -2  -3 2655.57  321.40
   0   2   3 1556.87  211.68
   0   2  -3 1835.17  226.78
   0   2   3 1882.85  230.63
   0  -2  -3 2128.99  268.31
   0   2  -3 1889.57  218.03
   3   1  -227994.85 1102.63
  -3   0  -120784.29  863.59
  -3   1   033954.98 2967.32
  -2  -2   2  636.21  106.14
   2  -2  -2  663.41   89.39
  -2   2   2 1581.98  204.55
   2   2  -2 1803.02  239.02
  -2  -2   2  621.97   91.70
   0   0   5  145.62  174.34
   0   0  -5  137.60  113.38
  -1  -1  -418028.55  746.00
  -1  -1  -416327.05  690.48
   1   1   418101.57  732.49
   1   1   416097.58  681.27
   3   1  -310726.10  456.70
  -3  -1   3 8128.79  353.75
  -3   1   310218.76  468.45
   3   1  -310107.36  415.65
  -3  -1   3 8578.15  361.64
   3  -1  -3 9177.81  411.50
  -2   2  -1 7373.52  329.39
   2  -2   1 8049.89  364.62
  -2  -2  -1 8524.68  468.57
   2   2   1 7794.22  399.31
  -2   2  -1 6803.19  306.75
  -2   0   5  286.13  130.30
  -2  -1  -318908.36  807.02
   2   1   315599.28  665.80
  -2   1  -317284.91  703.22
  -2  -1  -318482.67  749.56
   2   1   316239.04  672.71
   1  -1  -5 4417.61  216.51
  -1  -1   5 4238.06  203.31
   1   1  -5 5548.91  278.26
  -3   0   4 1308.38  173.52
   3   0  -4 1077.95  149.90
  -3   0   4  980.63  132.06
   3   0  -4 1023.46  146.53
   3  -1   1 4693.96  237.36
  -3  -1  -1 4671.44  247.63
   3   1   1 6586.76  302.52
  -3  -1  -1 4857.35  242.57
  -3   1  -1 6456.46  307.30
   2   2  -313647.71  561.26
  -2   2   314140.27  594.87
  -2  -2   316854.51  661.36
  -1  -2  -321393.60  896.01
  -1   2  -319844.35  820.52
  -1  -2  -321176.70  861.85
   1   2   318681.83  776.22
   0   1   513622.25  597.19
   0   1  -514765.19  616.86
   0  -1  -511846.93  503.69
   0  -1  -511177.72  558.70
   0  -1   512560.22  529.77
  -3   0  -2  318.62  134.32
   3   0   2  176.20   84.65
   3   0   2  277.23   55.93
  -3   0  -2  332.68   76.56
  -1   2   4 4817.70  219.55
   1   2  -4 4629.93  225.49
   1  -2  -4 5398.12  240.97
  -1  -2   4 5727.77  273.83
   1  -2  -4 5871.38  287.96
  -1   2   4 5486.24  283.61
  -2  -1   5 9541.43  405.26
  -2   1   5 7469.30  345.69
  -2  -1   5 8613.28  369.45
   2   1  -5 7143.07  324.84
  -2  -1   5 7988.76  353.80
   2  -1  -5 9476.97  422.95
   2  -1  -5 8755.99  372.77
   0   2  -4 3822.87  199.37
   0  -2   4 4203.46  178.94
   0   2   4 4187.06  208.19
   0  -2   4 4107.20  214.35
   0   2  -4 4691.99  194.66
   0   2   4 4711.13  253.01
   0  -2  -4 3900.55  214.46
   0  -2  -4 4278.65  236.43
  -2  -2  -2 9721.62  434.97
  -2   2  -2 7085.90  335.06
   2   2   2 7198.09  321.24
   2   2   2 8030.31  375.46
  -2   2  -2 7388.42  321.33
  -3   1   420862.29  846.91
   3   1  -419679.15  789.02
   3   1  -421379.54  845.61
  -1   0  -5  193.89  175.70
   1   0   5  177.45   88.77
   2   0   421588.65  885.88
  -2   0  -423892.39  961.54
  -2   0  -424126.48  978.89
   0   3   0   -5.82   45.44
   0  -3   0  -11.70   54.18
   0   3   0   -1.40   39.44
   0  -3   0    7.34   28.26
   3   1   233488.88 2945.71
   2   2  -4 7128.56  298.55
   2   2  -4 7416.31  329.92
   2  -2  -4 7813.25  330.54
  -2   2   4 7091.03  309.11
   2  -2  -4 6851.38  321.66
  -2   2   4 7284.43  345.34
  -2  -2   4 8071.83  328.58
  -2  -2   4 7872.67  353.76
   0  -3  -120113.32  813.57
   0  -3   121066.74  844.05
   0  -3  -120836.56  834.26
  -1   0   6 4166.71  245.98
   1   0  -6 4629.76  244.91
   3   0  -5 7286.32  310.11
   3   0  -5 6291.08  294.44
  -3   0   5 6550.47  315.28
   3   2  -2  115.19  112.46
   3   2  -2   73.09   75.12
  -3   2   2   65.61   78.65
   3  -2  -2  634.71  123.29
  -3   2   2   90.38   33.24
   4   0  -2 7969.38  365.55
   4   0  -2 7318.05  302.26
  -4   0   2 8532.09  403.58
   4   0  -111430.70  505.07
  -4   0   112390.89  530.17
   4   0  -111835.06  477.76
  -1   3   0 1438.57  193.93
   1   3   0 1348.84  174.65
  -1   3   0 1488.16  189.69
   1  -3   0 1446.12  187.83
  -1  -3   0 1453.44  197.16
  -1  -3   0 1452.89  199.00
   1   3   0 1355.43  198.19
  -1   3   0  995.06  133.40
   1  -1   5 1078.91  158.50
   1   1   5 1016.75  175.88
  -1   1  -5 1023.16  146.42
  -1  -1  -5  953.93  146.90
  -1  -1  -5  828.06  266.87
   1   1   5  953.27  135.80
   1   3  -1 1707.75  239.35
  -1   3   1 1456.10  184.30
  -1  -3   1 1743.59  214.90
   1  -3  -1 1787.11  239.84
   1  -3  -1 2192.77  272.69
  -1   3   1 1451.19  191.96
   1   3  -1 1387.29  185.20
  -1  -3   1 1991.57  253.55
  -3   2   0 8147.07  365.68
   3   2   0 8590.37  389.13
  -3  -2   0 9671.17  420.98
  -3   2   0 8193.36  337.10
  -3  -2   0 7018.37  335.89
   3   2   0 8741.76  446.54
   3  -2   0 7807.78  362.83
   2   1   4 4987.25  272.63
   2   1   4 5815.65  278.43
  -2  -1  -4 5902.19  328.11
  -2  -1  -4 5757.73  280.38
  -2   1  -4 4998.97  238.75
   2  -1   4 6509.57  303.30
  -1  -2  -4 7470.88  408.31
   1   2   4 7977.33  387.16
   1   2   4 8251.73  373.16
   1  -2   4 8822.31  374.39
  -1   2  -4 7770.90  363.11
  -1   2  -4 7941.69  332.64
  -1  -2  -4 8316.99  461.38
   0   0  -619276.87  821.45
   0   0   618039.35  790.04
  -4   0   3 4006.03  289.29
  -4   0   3 4548.53  200.56
   4   0  -3 3474.38  166.39
   4   0  -3 3787.17  320.19
   0  -3  -2   62.79   94.08
   0   3   2   30.80   48.26
   0   3  -2   27.64   50.58
   0  -3  -2   87.40   97.02
   0  -3   2  151.42  142.73
   0   3  -2   38.82   30.25
   0   3  -2   26.38   59.37
   0   3   2    9.71   24.54
   1  -3   1 1001.30  204.72
  -1  -3  -1  992.67  146.80
  -1   3  -1 1320.22  176.38
   1   3   1 1269.30  170.80
  -1   3  -1 1324.65  188.30
  -1   3  -1 1214.50  185.08
   1   3   1 1246.13  193.94
  -1  -3  -1  893.96  146.13
  -4   0   029052.81 1169.19
   4   0   028773.87 1156.86
   3   0   313087.60  568.76
  -3   0  -315447.05  646.10
  -3   0  -312995.13  579.67
  -3  -2   334733.64 3025.21
   1   3  -2 2119.29  314.07
  -1   3   2 2422.92  301.20
  -1   3   2 2252.23  271.88
   1  -3  -2 2302.28  308.41
  -1  -3   2 2450.86  290.61
   1  -3  -2 2104.03  262.81
   1   3  -2 2410.74  291.26
  -1  -3   2 2258.26  281.03
  -2  -2  -3 2295.16  292.69
   2   2   3 1536.54  197.60
  -2   2  -3 1747.76  228.88
   2   2   3 1762.51  242.08
  -2   2  -3 1797.43  221.29
   2  -2   3 1909.56  238.49
  -2  -2  -3 1850.95  280.52
  -3  -1   523173.44  925.02
  -3   1   523880.66  966.80
   1  -2  -510623.68  473.98
  -1   2   510215.94  469.09
  -1   2   510216.38  439.65
  -4  -1   2 2289.56  286.15
  -4  -1   2 2174.38  266.30
  -4   1   2 2671.00  330.46
   4   1  -2 2397.12  298.88
   4  -1  -2 2012.54  338.51
   4   1  -2 3030.29  154.33
  -4   1   2 2629.06  303.40
   4  -1  -1 8666.69  401.30
  -4  -1   1 7881.40  367.82
  -4   1   1 8755.95  360.71
  -4   1   1 7420.94  348.61
   4   1  -1 8459.66  368.76
  -4  -1   1 9003.54  400.08
   4   1  -1 8826.31  401.69
   2  -1  -6 1888.94  251.31
  -2  -1   6 1969.29  248.93
   2   1  -6 3251.09  174.30
   2  -1  -6 1974.75  279.09
  -2  -1   6 2255.65  303.18
   0  -2   5 1910.41  231.67
   0   2   5 2249.74  274.50
   0   2  -5 2347.38  279.11
   0   2  -5 2136.55  291.45
   0  -2  -5 1739.90  224.06
   0  -2  -5 1838.81  278.67
   0   2   5 2632.23  337.78
   0  -1  -610245.74  456.63
   0  -1   610337.07  447.41
   0   1  -612215.50  534.37
   0  -1  -6 9943.93  464.52
   0   1   611603.25  518.14
  -4   1   3 7153.34  338.99
  -4   1   3 6431.40  248.90
  -4  -1   3 6643.98  339.97
   4   1  -3 7207.40  334.56
  -4  -1   3 5521.82  251.46
   4   1  -3 6628.07  311.88
   4  -1  -3 6298.90  314.63
   4   0  -4 7003.19  297.71
   4   0  -4 8902.57  410.41
  -4   0   4 8761.15  364.52
  -4   0   4 8863.75  410.72
  -4   1   0 2195.04  279.46
   4   1   0 1939.06  240.38
  -4  -1   0 2844.48  282.55
  -4   1   0 2141.33  256.17
  -4  -1   0 2800.35  277.74
   4  -1   0 2607.34  330.35
   4   1   0 2233.96  297.35
   3   1   3 2430.05  297.13
  -3   1  -3 2541.33  310.61
   3   1   3 2362.65  321.15
   3  -1   3 2793.10  291.82
  -3  -1  -3 3086.91  183.43
  -3  -1  -3 2514.21  315.04
   1  -3   2  623.08  133.99
  -1  -3  -2  513.45  111.71
   1   3   2  729.31  244.38
   1  -3   2  552.70   84.51
  -1   3  -2  649.05   91.49
  -1  -3  -2  537.45  103.52
  -1   3  -2  559.96   90.23
   1   3   2  632.03   97.22
  -2   2   516588.70  706.26
   2   2  -517731.28  731.12
  -2  -2   518411.64  810.95
   2  -2  -518061.49  763.54
   4   0   1 7676.29  338.84
   4   0   1 6525.06  326.62
  -4   0  -1 7833.21  344.89
  -4   0  -1 6357.74  308.61
  -1   3   3 3296.39  182.77
  -1  -3   3 4299.04  183.70
   1   3  -3 3310.64  184.41
  -1   3   3 3428.27  284.00
   1   3  -3 2877.49  258.77
   1  -3  -3 4482.50  223.63
  -1  -3   3 3964.25  317.04
   1  -3  -3 4592.20  237.13
   0  -3  -329096.99 1171.84
  -3  -2   4 3665.11  196.09
  -3   2   4 3688.07  211.43
   3  -2  -4 3415.75  151.31
  -3   2   4 4234.67  232.51
   3   2  -4 4033.76  203.61
  -3  -2   4 3560.90  190.64
  -3   2   4 3565.91  158.66
   3   2  -4 3967.43  208.66
  -2  -3   0 1829.67  236.38
  -2   3   0 1597.66  205.19
  -2   3   0 1862.22  227.29
   2  -3   0 2066.59  260.56
  -2  -3   0 1599.38  209.36
   2   3   0 1611.01  225.90
   2   3   0 1519.52  221.26
   2  -3   0 2058.14  268.06
  -2   0  -5  408.18  171.93
  -2   0  -5  394.10   87.11
   2   0   5  408.42  211.93
  -3   0   6 1098.56  186.93
  -3   0   6 1327.91  175.76
   3   0  -6  878.74  117.85
  -2  -3   2 2581.55  335.90
  -2   3   2 2246.79  266.64
  -2   3   2 1902.95  245.04
   2   3  -2 2126.44  257.13
  -2  -3   2 2091.99  256.25
  -2   3   2 2095.43  266.81
   2   3  -2 2088.98  259.70
   2  -3  -2 2476.33  297.98
   1   0   6 6982.48  336.87
  -1   0  -6 5688.23  328.17
  -4  -1   4 1859.31  244.56
   4   1  -4 1800.05  271.52
   4   1  -4 1535.51  194.13
   4  -1  -4 2200.31  329.57
  -4  -1   4 2318.78  282.67
   4  -1  -4 2331.01  271.25
  -3  -2  -2 2330.74  371.27
  -3  -2  -2 2290.56  287.59
   3  -2   2 2382.75  297.75
  -3   2  -2 1509.98  192.51
   3   2   2 1392.92  199.94
   3   2   2 1599.62  220.82
   2   3   149180.09 4294.44
   4   1   114963.62  620.58
  -4   1  -113397.90  559.78
  -4  -1  -117443.94  715.77
   4   1   115088.19  649.28
   4  -1   118206.95  764.94
  -4   1  -114055.43  607.03
   2  -1   5 4152.00  249.51
  -2   1  -5 3179.81  194.74
   2   1   5 3679.07  227.14
  -2  -1  -5 3220.78  198.23
  -2  -1  -5 3868.08  249.98
   2   1   5 3305.52  191.56
  -1   2  -530745.87 2691.52
   1   2   531039.55 2730.97
  -1  -2  -529537.68 1214.74
  -1   0   7 9939.79  443.24
   1   0  -710337.90  451.37
   2   2   415182.94  652.62
  -2  -2  -414510.97  617.37
  -2  -2  -414677.53  656.54
   2   2   416313.07  713.68
  -2   2  -414966.85  636.22
   2  -2   415854.28  653.26
   2  -3  -332590.68 2851.81
   4   0  -5 7699.74  359.59
   4   0  -5 6588.41  282.48
  -3   0  -4 2487.25  325.07
   3   0   4 2758.28  348.34
  -3   0  -4 2682.54  331.22
  -3   1   631206.28 2735.32
   1  -3   3 3124.27  196.14
  -1   3  -3 2652.45  313.85
   1   3   3 2508.42  314.01
  -1  -3  -3 3251.53  207.93
  -1   3  -3 2595.16  318.16
  -1  -3  -3 2803.76  279.36
   1   3   3 2619.94  335.32
   1  -3   3 3264.74  196.36
  -1  -1  -617723.84  790.03
  -1  -1  -617578.73  764.29
   1  -1   616904.96  732.05
  -1   1  -618311.70  744.88
   1   1   617892.32  765.83
   2   0  -710359.37  451.35
  -2   0   7 7598.25  349.95
  -1   3   4 2681.82  352.03
   1  -3  -4 2815.25  283.51
   1   3  -4 2662.76  343.99
  -1   3   4 2662.41  321.45
  -1  -3   4 2639.48  331.49
   1  -3  -4 2593.04  322.06
   1  -2  -6 8397.66  379.98
  -1  -2   6 7892.16  326.36
   1  -2  -6 8554.19  453.44
   1   2  -6 8714.66  357.03
   1   2  -610515.40  471.91
  -1   2   610108.82  438.65
  -1   2   6 9443.33  448.85
   3   2  -511085.88  468.17
  -3  -2   513563.42  575.09
   3  -2  -512563.69  501.19
   3   2  -510755.79  465.03
  -3  -2   512163.89  509.23
  -3   2   513375.72  587.03
   0   3  -4 2746.47  334.11
   0  -3  -4 3276.06  203.36
   0   3   4 3053.01  292.23
   0  -3   4 3212.91  242.95
   0  -3  -4 3731.18  226.94
   0   3  -4 2865.70  260.99
   0   3  -4 3044.32  135.06
   0   3   4 2959.31  163.82
  -2  -3  -2 2258.57  286.38
   2  -3   2 2389.25  322.65
  -2  -3  -2 2841.71  288.90
  -2   3  -2 2428.34  297.99
   2   3   2 3031.01  348.44
   2  -3   2 2462.87  313.48
   2   3   2 2504.79  339.61
  -2   3  -2 2396.25  289.56
  -4   2   2 9923.05  452.79
   4  -2  -211033.61  504.58
  -4  -2   211525.21  510.65
   4   2  -211862.74  517.48
  -4  -2   211059.68  474.38
   4   2  -2 9978.19  455.63
   4   2  -1 5346.61  313.12
  -4  -2   1 6627.29  352.67
   4   2  -1 6057.76  296.47
  -4  -2   1 6673.76  329.03
   0   0   7 2822.40  297.12
   0   0  -7 2753.83  351.79
  -1  -1   7 3226.60  186.79
   1   1  -7 4016.82  210.59
   1  -1  -7 2840.28  280.30
   1  -1  -7 4018.18  213.43
  -4  -1   5 2194.55  278.36
  -4   1   5 2414.37  303.08
   4   1  -5 2018.99  290.60
  -4  -1   5 2296.95  282.93
   4  -1  -5 2486.88  310.80
   4   1  -5 2282.90  284.09
   4  -1  -5 1754.54  207.17
   3   1   422084.91  898.80
  -3  -1  -418305.08  772.51
   3   1   421886.82 1009.92
   3  -1   417765.47  743.42
  -3   1  -421425.06  907.25
  -3  -1  -418132.97  794.26
  -2   2   616846.48  721.29
  -2   2   616528.46  665.85
  -2  -2   615868.10  668.31
  -2  -2   618411.54  725.85
   2   2  -616945.87  710.44
   2  -2  -617673.72  775.74
   0   2  -610895.22  497.94
   0  -2  -610760.85  492.13
   0   2  -611516.49  468.82
   0   2   611830.39  507.66
   0  -2  -611833.81  565.74
   0  -2   611786.60  479.21
   0   2   612106.42  555.39
  -4  -1  -2 1440.51  197.19
  -4  -1  -2 1194.19  166.16
  -4   1  -2 1509.02  195.07
  -4   1  -2 1494.92  204.22
   4   1   2 1354.17  177.03
   4  -1   2 1189.92  184.43
   4   1   2 1534.74  348.79
   4   2  -3 8729.96  394.59
  -4  -2   3 8216.64  391.25
  -4  -2   3 8756.36  396.17
   4   2  -3 9105.63  408.02
   4  -2  -3 8649.37  421.49
  -4   2   3 9116.42  421.47
   2  -1  -7 7050.64  353.37
  -2   1   7 6358.53  341.78
  -2  -1   7 6535.94  328.63
   2   1  -7 6933.39  321.76
   2   1  -7 7020.53  350.56
   2  -1  -7 7230.80  327.28
   4   2   0 9281.72  413.27
   4  -2   0 9215.41  446.88
  -4   2   0 8671.48  446.53
  -4  -2   0 9705.77  440.46
  -4  -2   0 9186.03  460.90
   3   2   342101.37 3686.27
  -2   3   4 9287.82  391.10
   2  -3  -4 9178.50  478.12
  -2  -3   4 8324.35  337.67
  -2  -3   4 9650.10  447.91
   2   3  -4 9155.93  363.87
  -2   3   4 8932.02  420.67
   2   3  -4 9604.54  448.93
   2  -3  -4 9756.53  430.64
   3  -3  -1 1301.41  185.67
  -3   3   1  859.61  130.82
   3  -3  -1 1550.67  222.63
   3   3  -1  934.71  150.59
  -3  -3   1 1114.42  190.50
   3   3  -1  793.35  137.70
  -3   3   1  797.92  124.71
  -3  -3   1 1039.49  163.02
   3   3  -2  509.24  158.72
  -3   3   2  434.98  126.36
  -3  -3   2  454.10   81.22
  -3   3   2  469.46   65.99
  -3  -3   2  463.63   94.41
   3   3  -2  462.26  113.93
  -3   3   2  454.80   97.77
   3  -3  -2  455.67  124.09
   0  -1  -7 1321.21  186.58
   0   1  -7 2142.43  316.95
   0   1   7 2022.42  274.68
   0  -1  -7 1236.99  178.58
   0  -1   7 1202.59  164.71
   3   3   0 2362.64  310.81
  -3  -3   0 2237.28  289.47
   3  -3   0 2265.09  277.04
  -3  -3   0 2218.58  283.18
   3  -3   0 2371.68  386.36
   3   3   0 2292.11  284.47
  -3   3   0 2523.44  308.75
  -3   3   0 2311.48  280.42
   3   0  -713721.03  575.94
  -3   0   714792.16  624.84
  -3   0   713836.89  620.09
   5   0  -2   91.64   27.25
  -5   0   2  153.39  110.18
  -5   0   2  107.26  114.28
   5   0  -2  124.94  200.77
  -4   0   6 8754.22  419.24
   4   0  -611199.35  460.59
   4   0  -610033.97  465.94
  -1  -3  -4 1784.33  263.05
   1   3   4 1405.18  197.51
  -1   3  -4 1451.80  199.38
  -1  -3  -4 1531.99  206.33
  -1   3  -4 1566.36  191.06
   1  -3   4 1813.12  224.20
   1   3   4 1677.24  240.92
  -5   0   1  660.26  104.81
   5   0  -1  591.53  133.06
  -5   0   1  614.87  111.52
   5   0  -1  603.34   88.34
   5   0  -3 1481.98  207.94
  -5   0   3 1627.94  217.20
   5   0  -3 1553.59  190.07
  -5   0   3 1388.07  187.58
  -4  -2   4 9061.24  434.18
  -4  -2   4 8923.32  419.20
  -4   2   4 6973.15  342.20
   4   2  -4 7135.40  346.86
   4   2  -4 7111.84  340.01
   4  -2  -4 8368.64  414.41
  -2   0  -6 8588.97  448.93
  -2   0  -6 8748.92  410.07
   2   0   6 8976.97  422.31
  -3   3   3 3753.24  172.12
   3  -3  -3 4739.84  215.59
   3   3  -3 3659.51  287.10
  -3  -3   3 4542.53  247.22
  -3   3   3 3781.93  226.90
  -3   3   3 4838.55  265.70
  -3  -3   3 4541.47  254.52
   3   3  -3 3587.27  209.77
   4   0   3 4390.41  306.73
  -4   0  -3 3838.40  220.15
   4   0   3 4108.73  315.80
  -4   0  -3 4312.78  234.28
  -4  -2  -1 4541.02  290.32
  -4  -2  -1 4232.24  228.86
   4  -2   1 4148.05  238.67
   4   2   1 3113.07  217.49
   4   2   1 3479.39  229.69
  -4   2  -1 2841.97  317.71
  -2  -3  -347057.54 4115.21
  -1  -3   510920.44  491.66
  -1   3   5 9099.66  443.22
   1  -3  -510022.16  464.47
   1   3  -5 8936.59  413.98
  -1   3   5 9143.80  420.54
   1  -3  -510649.09  478.51
   3   3   1 4061.04  305.68
  -3  -3  -1 3424.54  262.21
  -3  -3  -1 3561.75  205.98
  -3   3  -1 3572.06  192.95
  -3   3  -1 3713.87  214.87
   3   3   1 3941.35  212.25
   3  -3   1 2885.16  287.38
  -2  -2  -5 6401.66  343.97
  -2   2  -5 7170.00  344.84
   2   2   5 7285.02  387.42
   2  -2   5 6894.86  336.10
   2   2   5 6167.83  301.83
  -2  -2  -5 6677.13  350.35
  -3   1   725958.36 1061.27
   3   1  -723923.19  971.32
  -3  -1   723064.90  930.66
  -3   1   725039.37 1080.78
   1   0   7 4343.26  245.22
  -1   0  -7 3897.26  228.95
  -3   2   6 7187.27  352.52
  -3  -2   6 6163.04  328.66
   3   2  -6 7878.20  350.66
  -3   2   6 7549.32  375.10
  -3  -2   6 6240.89  281.65
   3  -2  -6 6658.30  291.96
   3   2  -6 7168.09  337.53
  -5  -1   222146.94  911.55
  -5   1   221978.85  915.70
   5   1  -222345.53  924.97
   5   1  -222695.40  905.93
   5  -1  -221254.63  897.75
   5   0   0  390.82  161.57
  -5   0   0  394.83   82.66
   5   0   0  341.77   78.10
  -5   0   0  309.67  220.55
  -4  -1   618816.55  781.46
  -4   1   618905.78  800.26
   4   1  -619141.17  800.30
  -4  -1   617336.31  729.38
  -4   1   617718.49  774.13
   3   0   5  213.85  232.54
  -3   0  -5  214.61  200.95
  -3   0  -5  186.30   85.09
  -1   2  -611058.77  399.76
  -1  -2  -611755.90  448.51
  -1  -2  -6 9911.58  467.52
   1   2   6 9865.75  407.79
   1  -2   610621.25  365.38
   0   3   546318.15 3665.73
   0   3  -549474.52 3859.09
  -5   0   4 3146.21  293.18
   5   0  -4 2818.42  292.86
  -5   0   4 2799.40  281.34
   5   0  -4 2643.78  244.11
   0  -4   0 5928.92  587.55
   0   4   0 4463.88  420.11
   0   4   0 4873.78  457.68
   0  -4   0 6032.47  551.93
  -5   1   1 7907.99  403.53
  -5  -1   1 9137.71  355.45
   5   1  -1 8656.39  361.99
   5  -1  -1 9744.85  388.34
  -5  -1   3 4560.09  427.22
  -5   1   3 4689.35  454.07
  -5  -1   3 4354.61  417.53
  -5   1   3 5545.53  488.44
   5   1  -3 4590.24  466.86
   5  -1  -3 4564.20  403.80
   5   1  -3 4599.87  438.03
   5  -1  -3 5194.51  497.26
   2  -1   6 7581.23  321.29
   2   1   6 9250.45  382.40
  -2  -1  -6 7980.00  322.80
  -2  -1  -6 7626.48  333.65
   2   1   6 7650.57  339.51
  -2   1  -6 8366.81  346.87
  -4   1  -3 7034.59  290.68
   4   1   3 7077.99  329.50
  -4   1  -3 6697.78  553.27
  -4  -1  -3 8805.88  365.24
  -4  -1  -3 7422.52  318.00
   4  -1   3 7936.63  368.32
   4   1   3 6809.12  583.75
   0  -4  -1  191.90  139.63
   0  -4   1  209.36  134.08
   0   4  -1   90.24   95.69
   0  -4  -1  173.13   69.98
   0  -4   1  177.18  131.79
   0   4  -1  104.34   68.92
   0   4   1   91.12   76.80
   0   4   1   90.97   94.29
   2  -3  -529771.99  985.08
   3   3  -4 1958.92  203.06
  -3   3   4 1899.84  209.91
  -3  -3   4 2004.92  206.83
  -3   3   4 1843.41  176.94
   3  -3  -4 2083.33  217.21
  -3  -3   4 1834.43  244.94
   3   3  -4 1948.69  210.52
  -3   3   4 1642.22  195.18
  -1   4   0  298.64   71.37
  -1  -4   0  419.52   77.03
   1   4   0  272.16  267.36
   1   4   0  275.42  184.73
  -1  -4   0  576.48  104.46
   1  -4   0  521.31   96.35
  -1   4   0  273.91   54.05
  -1   4   0  246.19  103.89
  -1   0   812662.35  480.65
   1   0  -810945.88  423.95
   1  -4  -116195.27  593.54
  -1   4   116226.42  537.83
   1   4  -116516.77  556.66
   1   4  -116427.17  571.43
  -1  -4   114274.56  470.41
  -1   4   114731.80  506.06
  -1  -4   115744.00  565.64
   1  -4  -114516.96  499.42
  -1   2   717236.29  617.20
   1  -2  -716346.50  570.41
   1  -2  -718858.97  622.53
   1   2  -718454.72  571.89
  -1   2   716176.75  568.61
  -1  -2   717718.68  541.76
  -4  -2   5 6830.64  558.64
   4   2  -5 7013.60  331.36
   4   2  -5 7899.23  365.36
  -4   2   5 7047.78  301.52
   4  -2  -5 6960.83  219.59
  -4  -2   5 6422.73  545.45
   1   1   7  710.18  126.54
  -1   1  -7  768.69  112.00
  -1  -1  -7  977.42  149.64
  -1  -1  -7 1211.61  152.21
   1  -1   7  865.82  121.43
  -3   2  -4 9483.70  352.18
   3  -2   4 9617.32  382.89
   3   2   4 7935.30  348.39
  -3  -2  -4 8481.79  335.88
   2   0  -817200.52  611.56
  -2   0   820622.71  687.09
  -5  -1   021436.69  715.16
   5  -1   020126.17  683.20
   5   1   024350.61  803.27
  -3  -1  -5 1086.82  263.74
  -3   1  -5 1174.04  136.40
   3   1   5 1094.45  135.03
   3   1   5 1167.85  277.17
  -3  -1  -5 1104.07  153.05
   3  -1   5 1065.77  142.91
  -5  -1   413093.02  460.95
   5  -1  -413264.10  643.20
   5   1  -414024.28  502.00
  -5  -1   412474.27  448.94
   5   1  -412983.76  423.05
  -4  -2  -216180.61  574.10
   4   2   216281.13  554.72
  -4  -2  -215090.84  548.75
   4  -2   215452.46  611.24
  -4   2  -215724.76  544.90
   4   2   217255.81  609.45
  -2  -2   710356.49  352.18
  -2   2   7 9014.69  380.97
   2  -2  -710350.52  374.19
   2   2  -710034.48  393.32
   0   4  -210904.61  408.62
   0   4   210497.60  372.87
   0  -4   210554.59  408.16
   0   4  -211732.28  389.99
   0   4  -211945.14  402.61
   0  -4  -210071.22  476.01
   0   4   210821.57  435.21
   0  -4  -210851.30  412.25
  -3  -3  -2 2419.56  306.35
  -3   3  -2 2140.85  214.34
   3  -3   2 2284.42  243.64
  -3  -3  -2 2474.72  267.64
  -3   3  -2 2515.13  245.64
   3   3   2 2571.99  272.96
  -1  -4  -115435.32  544.25
   1   4   113214.96  593.94
  -1   4  -114080.46  471.95
   1  -4   115382.66  532.51
  -1   4  -113293.33  484.19
   1   4   113131.49  459.19
  -1  -4  -115826.59  545.64
  -1   4  -112719.30  430.09
   5   0   1  879.04  148.38
   5   0   1  762.11  142.26
  -5   0  -1  809.58  106.22
  -1  -4   2 1165.42  172.19
  -1   4   2  979.47  142.85
   1  -4  -2 1159.57  140.20
   1   4  -2  862.44  105.68
  -1   4   2  836.11  149.18
   1   4  -2  795.29  107.78
  -1  -4   2 1099.45  121.26
   1  -4  -2 1210.73  152.10
  -5   0   5 1549.22  157.05
   5   0  -5 1361.22  139.37
   5   0  -5 1203.70  347.32
  -5   0   5 1418.86  170.76
   0   2   710108.87  370.75
   0   2   7 9691.97  413.39
   1  -1  -816449.87  555.63
  -1   1   813787.91  572.98
   1  -1  -815845.47  544.27
   1   1  -813527.14  481.79
  -4   0   719661.65  679.98
  -4   0   721976.93  715.92
   4   0  -720721.92  650.30
  -1   3  -515422.70  541.55
   1  -3   516180.33  501.94
  -1  -3  -515009.86  536.37
   1   3   515452.78  591.94
   1   3   514074.37  496.76
   2  -3   4  982.43  124.86
   2   3   4  811.94  160.77
  -2   3  -4 1027.88  121.63
  -2  -3  -4  992.55  136.73
  -2   3  -4  888.63  116.12
  -2  -3  -4 1232.97  157.90
   2  -1  -8 9108.53  336.46
   2   1  -810446.95  399.31
   2  -1  -8 8656.42  359.03
  -2   1   810530.08  479.78
  -2  -1   8 8939.52  335.48
   2   1  -811102.78  381.50
   4   0   425981.30  856.18
  -1   4  -2 1437.70  148.15
   1   4   2 1795.60  203.54
   1   4   2 1422.60  191.73
  -1   4  -2 1514.27  222.02
   1  -4   2 2031.52  249.09
  -1   4  -2 1700.94  191.00
  -1  -4  -2 2028.29  241.42
  -1  -4  -2 2135.37  230.91
   3   0  -8 4468.66  481.39
  -3   0   8 3411.69  331.39
  -3   0   8 4704.71  446.75
   5  -1   1 8835.98  413.44
   5   1   1 8687.20  366.88
  -5  -1  -1 9158.02  404.31
   5   1   1 8586.81  319.95
  -5   1  -1 8339.15  304.62
  -1   3   6  991.01  152.46
   1  -3  -6  959.34  202.11
  -1   3   6 1045.93  133.68
  -1  -3   6  905.52  153.81
   5  -1  -514989.05  544.27
   5   1  -513929.37  459.48
  -5  -1   512626.98  455.27
  -5  -1   514689.94  514.47
   5   1  -514555.85  551.18
   3   3  -5 3056.99  282.23
  -3  -3   5 3829.92  359.97
  -3  -3   5 3521.95  350.18
   3  -3  -5 3726.56  363.59
  -3   3   5 2927.10  362.07
  -3   3   5 2883.33  267.19
   2   4  -1 1872.77  201.10
  -2   4   1 2042.93  212.21
  -2   4   1 2138.54  243.45
  -2  -4   1 2031.27  237.17
  -2   4   1 2191.45  214.57
   2  -4  -1 1832.74  220.94
  -2  -4   1 2080.15  211.77
   1  -4  -319768.07  693.31
  -1  -4   319911.17  664.82
  -1   4   324717.84  877.43
   1  -4  -320826.94  667.29
  -1   4   323432.56  735.09
   0  -4  -3 1750.92  224.40
   0  -4   3 2079.52  246.16
   0  -4  -3 2056.85  257.23
   0   4   3 1390.07  152.22
   0   4  -3 1401.30  176.08
   0   4   3 1107.97  256.70
   0   4  -3 1249.62  127.66
  -4  -3   210769.24  438.36
   4  -3  -210909.05  421.96
  -4  -3   211553.47  433.93
  -4   3   210338.37  323.87
   4   3  -210033.01  383.15
  -2  -4   0 7460.17  302.35
  -2   4   0 9231.18  352.79
   2   4   0 9658.71  369.30
   2  -4   0 8410.54  310.62
  -2  -4   0 7735.58  319.17
  -2   4   0 8585.54  338.05
  -2   4   0 9542.71  353.94
  -4  -1   7 2511.31  282.50
   4   1  -7 2695.28  275.68
  -4   1   7 2819.73  301.71
   4  -1  -7 2609.72  250.26
  -4  -1   7 2196.67  299.76
  -4   1   7 2739.36  307.56
   4   1  -7 2526.36  249.15
   3  -2  -7 7923.36  281.13
  -3   2   7 5418.80  561.66
  -3  -2   7 7107.28  311.29
  -3  -2   7 7917.39  292.52
  -3  -2   7 8835.10  352.40
   0   1   816410.30  597.66
   0  -1   818794.09  626.65
   0  -1  -818600.07  677.49
  -2  -4   2 6977.59  304.34
  -2   4   2 6801.97  555.34
  -2   4   2 6379.37  535.16
   2   4  -2 6986.57  269.36
  -2  -4   2 6616.17  546.90
   2  -4  -2 7451.64  284.25
  -2   4   2 6761.53  567.27
   5   2  -212590.80  473.02
  -5   2   212413.93  376.22
   5   2  -212395.37  438.26
   5  -2  -214641.51  596.26
  -5  -2   215154.42  534.11
  -5  -2   214890.86  519.01
  -2   3   614630.80  507.77
  -2  -3   614511.54  516.54
   2  -3  -614246.12  469.17
  -2   3   615491.04  573.47
  -4  -2   619140.53  612.27
   4   2  -616563.42  574.47
  -4  -2   621218.50  700.98
  -4   2   620686.30  709.16
   4   2  -618007.68  594.40
   0   3  -6 7812.89  252.10
   0  -3  -6 8773.15  383.78
   0   3   6 9282.65  402.39
   0   3   6 7325.72  285.28
   0  -3   6 8869.60  295.32
  -4  -3   343465.75 3410.74
  -5  -2   128892.81  931.99
   5  -2  -125103.97  829.51
   5   2  -127581.64  861.76
   5   2  -128057.62  938.64
  -5  -2   126331.95  857.41
  -4   1  -4 4832.89  456.92
  -4  -1  -4 5676.91  550.46
   4  -1   4 5989.58  562.69
  -4   1  -4 4238.95  405.41
   4   1   4 4660.23  461.68
   5  -2  -320196.10  732.70
  -5  -2   321378.48  758.06
  -5  -2   318385.31  613.40
   5   2  -319906.86  706.07
   5   2  -321581.26  696.09
  -2  -2  -612234.08  485.87
   2   2   610971.82  454.13
  -2   2  -610802.61  382.04
   2  -2   612941.61  447.30
   5   0   2  230.49  174.97
  -5   0  -2  237.48  137.15
   5   0   2  193.13   52.16
  -4  -3   014033.90  517.93
   4  -3   015100.22  564.93
  -4   3   013670.44  436.38
   4   3   013830.13  551.25
  -3   3  -3 3983.89  378.76
   3  -3   3 5811.36  544.44
  -3   3  -3 4342.19  405.39
   3   3   3 3786.86  379.88
  -3  -3  -3 5884.56  551.50
  -2   0  -7   75.03   48.94
   2   0   7   93.59  134.26
  -2   0  -7   79.42  130.71
  -3  -1   812535.94  429.50
   3   1  -812551.82  465.22
  -2  -4  -1 4088.09  396.40
  -2   4  -1 3782.90  365.32
  -2   4  -1 3526.60  339.41
   2   4   1 4015.16  475.67
   2  -4   1 4375.01  412.54
  -2  -4  -1 3603.54  347.44
  -2   4  -1 3687.98  349.75
   4  -2   3 1372.12  271.38
  -4   2  -3 1639.67  178.93
   4   2   3 1540.90  201.10
  -4  -2  -3 1164.01  154.40
   5   0  -6 5437.17  495.80
   5   0  -6 5527.48  521.70
  -5   0   6 5661.10  509.18
  -5   0   6 6673.78  558.05
   3   0   6 7606.33  335.94
  -3   0  -6 6610.71  574.11
  -2   4   3 6352.16  538.66
  -2  -4   3 9049.67  315.89
   2   4  -3 8534.46  287.51
  -2  -4   3 8513.29  454.24
   2  -4  -3 8139.82  335.92
   2  -4  -3 8509.49  332.86
  -2   4   3 8049.69  303.68
   1  -2   724901.21  807.79
  -1   2  -723658.24  753.81
  -1  -2  -723892.22  798.19
   1   4   331732.60 1065.42
  -1   4  -333999.89 1020.21
  -1  -4  -332053.03 1062.87
  -1  -4  -332348.71 1013.87
  -5   2   0 9724.49  347.32
  -5  -2   011712.91  453.30
   5   2   010035.37  385.04
  -3   2  -533156.37 1026.05
  -3  -2  -531486.80 1025.22
   3   2   528188.72  939.39
   5   2  -413920.87  510.95
  -5  -2   414842.79  559.52
   5   2  -414173.88  500.35
   4  -3  -415014.77  456.96
  -4   3   413662.02  650.20
  -4  -3   414617.00  523.56
  -4  -3   414800.93  528.12
   4   3  -415558.55  523.07
  -4   3   415536.84  471.86
  -1   0  -814245.28  517.15
   1   0   814349.01  522.53
   5   1   227746.71  920.16
   5   1   230830.96  957.41
   5  -1   229551.28  997.93
  -5  -1  -231458.56  999.02
  -2  -1  -7 6042.58  570.71
   2  -1   7 6698.54  561.10
  -2   1  -7 6097.66  564.54
   2   1   7 7060.02  323.48
  -1  -4   4 5953.36  590.12
   1  -4  -4 6074.40  564.39
  -1   4   4 5678.30  530.65
   1   4  -4 5661.60  503.01
   1   4  -4 5287.30  466.70
  -1   4   4 5401.65  522.04
  -5  -1   611165.35  397.57
   5   1  -612179.96  495.15
   5  -1  -611056.72  345.17
  -5  -1   611620.80  431.62
   5   1  -611786.25  400.54
   0   4  -414479.59  441.93
   0  -4  -414881.74  578.51
   0   4   413105.69  450.96
   0   4  -413705.06  427.54
   0  -4   415483.86  559.63
   2  -4   2 9571.98  366.89
   2   4   211266.32  602.35
  -2  -4  -2 9876.42  467.10
   2  -4   2 9370.64  525.96
  -2   4  -211049.17  400.43
  -2  -4  -2 8974.88  355.54
  -2   4  -211611.80  402.34
  -3   1  -611203.18  418.65
   3   1   610619.50  439.63
  -3  -1  -612537.60  460.88
   3  -1   612582.58  465.54
  -1  -2   815118.02  492.23
  -1   2   813693.42  530.13
   1  -2  -815061.03  530.53
   1   2  -815232.53  479.84
  -3   3   6 5212.09  476.64
  -3  -3   6 4801.13  523.57
   3  -3  -6 5033.81  457.59
  -3  -3   6 5455.42  489.12
  -3   3   6 5589.49  537.31
   3   3  -6 5636.92  508.44
  -2  -2   816242.61  523.40
  -2  -2   814630.27  479.63
   2  -2  -813706.43  534.90
  -2   2   817666.83  654.72
   1   3   6 1233.75  258.55
   1  -3   6 1265.07  172.97
  -1   3  -6 1373.79  138.54
  -1  -3  -6 1197.62  160.42
   4   0  -8 8203.01  366.74
  -4   0   8 7737.82  360.89
  -4   0   8 9768.31  391.26
   2   0  -9 9115.38  406.53
  -2   0   911124.47  430.71
   1  -1   8 9848.79  452.14
  -1   1  -8 9324.88  352.48
  -1  -1  -810568.08  410.30
   1   1   8 9026.89  415.71
  -1   0   9 4491.35  437.25
   1   0  -9 5713.80  529.30
   5  -2   116442.85  582.17
  -5  -2  -116235.34  566.42
  -5   2  -118920.69  603.18
  -2  -4   4 8439.54  371.52
   2  -4  -4 8726.99  350.04
  -2   4   4 8126.35  352.64
  -2   4   4 6868.76  558.04
  -2  -4   4 8335.33  274.94
   2   4  -4 6748.03  542.72
   3   4  -118754.50  653.39
  -3  -4   119164.29  671.69
  -3  -4   117360.82  601.48
  -3   4   117769.93  635.42
  -3   4   117985.80  604.53
  -3   4   116677.03  538.46
   3  -4  -118276.02  604.90
   6   0  -220053.35  630.98
   6   0  -219617.61  714.50
  -5  -2   518508.23  624.85
   5   2  -517784.62  651.65
  -5  -2   517696.25  600.46
   5  -2  -515129.70  555.79
   6   0  -312396.99  403.95
  -6   0   311027.07  370.82
   6   0  -312343.79  468.67
  -4   0  -5  866.00  147.21
   4   0   5  853.78  167.31
  -3   4   2 3669.73  374.41
  -3  -4   2 4644.78  450.30
  -3   4   2 4414.32  428.78
   3  -4  -2 4343.87  408.48
  -3  -4   2 4130.72  403.15
  -3   4   2 3965.71  371.52
   3   4  -2 4488.20  429.76
   5   0   3  228.82   53.28
  -5   0  -3  299.73  220.10
   5   0   3  307.74  241.07
   4   2  -718177.04  588.98
   4   2  -716216.38  580.67
  -4  -2   717644.97  624.69
  -1   3   723697.35  816.35
  -1   3   719961.48  648.06
   1  -3  -721728.19  704.92
   3  -4   0  508.32   92.15
  -3   4   0  402.92   86.04
  -3   4   0  269.36   68.94
   3  -4   0  527.53  115.84
   3   4   0  431.56   88.13
  -3  -4   0  601.15  113.71
  -3  -4   0  480.14   94.08
  -4  -3   522731.12  716.27
   4   3  -519829.23  643.88
  -4   3   521299.02  743.72
  -4  -3   520235.71  717.02
   0  -2  -814456.85  548.53
   0  -2   813063.84  455.01
   0   2  -811516.18  395.88
   0   2   811527.09  544.31
  -3   3  -4  972.69  131.55
  -3  -3  -4 1021.41  235.28
  -3   3  -4  952.87  119.79
   3  -3   4  958.42  156.89
   3   3   4  997.18  292.02
  -6   0   115415.24  510.64
   6   0  -114897.53  508.68
   6   0  -115736.73  576.00
  -5   0   7 2707.41  284.37
   5   0  -7 2062.94  253.84
   5   0  -7 2425.02  274.75
  -4  -1   8 7050.21  297.14
  -4  -1   8 8190.02  381.89
   4   1  -8 7079.59  278.72
  -4   1   8 5740.79  550.50
   1  -4   4 3545.55  355.28
  -1  -4  -4 3294.11  369.37
   1   4   4 2017.67  237.55
  -1   4  -4 2901.51  275.88
  -4  -3  -2 2755.90  298.47
   4   3   2 3818.27  394.21
   4  -3   2 2857.70  337.06
  -4   3  -2 3519.39  331.92
  -4   3  -2 4054.77  387.59
  -6   0   411156.57  375.39
   6   0  -411618.42  381.74
   6   0  -411081.77  446.16
  -4  -2  -4 9264.77  441.29
   4   2   4 8991.73  395.76
  -4   2  -4 8516.08  342.54
   4  -2   4 9407.20  397.54
  -2  -3   7 6993.88  209.64
  -2   3   7 6394.58  528.90
  -2   3   7 6624.42  581.32
   2  -3  -7 6668.54  561.15
  -2  -3   7 7239.12  328.29
   2   1  -910466.05  386.24
   2  -1  -910210.54  383.71
  -2  -1   911530.88  418.44
  -2   1   910464.12  449.21
  -1  -1   9 5178.99  533.20
   1  -1  -9 5413.19  508.16
   1   1  -9 3988.77  373.10
  -1   1   9 4437.74  452.67
  -3  -2   810016.01  358.94
   3  -2  -811802.05  418.73
  -3   4   325852.66  858.26
  -3  -4   325335.33  860.80
  -3   0   9 8047.94  337.37
   3   0  -9 9746.53  381.41
   6   1  -2 5202.40  500.28
  -6   1   2 5142.59  460.87
   6   1  -2 5383.99  498.82
   6  -1  -2 6110.19  581.97
  -6  -1   2 5807.63  538.87
   2  -4   3 6400.42  538.88
  -2   4  -3 5669.55  518.78
  -2  -4  -3 5506.77  534.93
  -2   4  -3 5037.26  492.44
   2  -4   3 6029.16  552.54
   2   4   3 5669.21  548.24
  -6  -1   3 4539.18  421.81
   6   1  -3 5856.93  559.54
   6  -1  -3 4412.25  454.59
   6   1  -3 5816.47  529.43
   6  -1  -3 4702.37  420.72
  -6   1   3 5902.89  523.18
   4  -1   5 9889.62  419.51
  -4   1  -510945.99  408.33
  -4  -1  -510075.73  409.14
   4   1   511748.20  485.98
   0   0   9 5335.74  515.57
   0   0  -9 6291.53  544.88
  -1   4   522276.64  777.00
  -1   4   520402.42  655.61
   1  -4  -520934.01  712.88
  -1  -4   519022.90  681.45
   0  -3  -725102.88  819.08
   0   3   724990.80  930.26
   5  -1   3 4054.74  409.23
   5   1   3 2460.00  280.12
  -5  -1  -3 3600.84  350.38
  -5   1  -3 2794.03  284.13
  -3  -4  -133643.25 1094.53
  -3  -4  -133072.71 1056.88
   3   4   133463.21 1072.55
  -3   4  -131936.67  999.55
   6   1  -1 3696.61  377.29
   6  -1  -1 2553.22  289.40
  -6   1   1 3754.78  348.95
   6   1  -1 3538.17  337.20
  -6  -1   1 2442.10  297.61
  -5  -1   716450.25  553.77
   5  -1  -715520.35  491.74
  -5  -1   716105.41  605.39
   5   1  -717454.07  591.32
   5   1  -716976.75  569.13
   6   0   026952.40  961.57
  -6   0   028601.27  900.77
   6   0   027245.45  853.77
   0  -4   5 8024.24  346.98
   0   4  -5 7394.38  233.52
   0   4  -5 8495.36  270.73
   0  -4  -5 8492.32  349.60
   0   4   5 7818.34  370.88
   6  -1  -4 6033.39  576.15
   6   1  -4 6084.27  573.75
   6  -1  -4 5941.09  524.89
  -6  -1   4 6278.39  577.20
   6   1  -4 6138.07  566.92
  -6   1   4 6915.86  223.71
   5  -2   2 4114.88  408.86
  -5   2  -2 3106.72  329.93
  -5  -2  -2 4610.23  445.51
   5   2   2 3694.32  381.55
   2  -2   7 8679.66  376.31
   2   2   710512.68  450.17
  -2  -2  -7 9305.96  408.15
  -2   2  -710321.79  375.45
   6   0  -511360.17  456.04
   6   0  -511661.55  388.12
  -6   0   512694.90  425.57
  -3   1   916750.48  596.43
  -3  -1   917590.43  595.41
  -3  -1   915528.40  542.60
  -2   4   512545.61  439.35
  -2  -4   511827.29  586.07
  -2   4   512973.83  526.88
   2   4  -512431.12  358.97
   2  -4  -511947.87  445.32
   5   2  -613651.92  484.30
  -5  -2   612587.07  497.16
   5   2  -612309.16  443.68
  -5  -2   612869.60  462.46
   0  -1  -9 4461.36  435.21
   0  -1   9 4389.30  422.09
   0   1  -9 4564.91  438.61
   0   1   9 3828.67  431.82
  -3  -4   4 4428.87  404.42
  -3   4   4 5818.28  564.98
   3   4  -4 6074.50  569.69
  -3  -4   4 5456.09  548.47
  -3   4   4 6097.11  548.79
   3  -4  -4 5026.24  460.17
  -3  -2  -6 4180.91  413.68
  -3   2  -6 3887.44  374.24
   3   2   6 3920.06  406.57
   3  -2   6 4554.16  438.58
  -3   3   712030.59  480.57
  -3  -3   712528.70  395.09
   3  -3  -711555.66  406.35
  -3  -3   711231.30  353.21
  -3   3   711597.70  392.95
  -3  -3   710971.58  472.81
   2   0   8 9543.27  407.26
  -2   0  -8 9191.49  392.14
  -5   3   2   14.15   48.61
  -5  -3   2   24.66   81.06
   5  -3  -2   -7.01   93.56
   5   3  -2   19.24   58.83
  -5  -3   2   62.79   67.46
   6   1   0 2313.68  237.02
   6   1   0 2601.36  288.85
   6  -1   0 2586.12  292.51
  -6  -1   0 2790.69  352.81
  -6   1   0 2536.29  251.42
  -3   0  -7 2251.15  251.93
   3   0   7 2601.79  325.18
  -4  -3   615809.39  509.60
  -4   3   618675.42  573.95
   4  -3  -616906.04  535.48
  -4  -3   617350.03  693.29
   4   3  -619903.62  623.77
  -4   3   616833.82  673.21
  -5   3   1  532.61   66.20
   5  -3  -1  518.34  139.90
   5   3  -1  708.69  133.53
  -5  -3   1  455.89  114.29
  -5  -3   1  392.54  242.18
   5  -3  -3 3788.18  438.21
  -5   3   3 3439.33  306.46
   5   3  -3 3852.86  393.06
  -5  -3   3 4112.30  395.17
  -5  -3   3 4320.24  419.86
   1  -2   811643.99  461.44
  -1  -2  -810579.17  521.64
  -1   2  -812685.35  490.70
   1   2   811780.27  494.23
  -3  -4  -2 1781.20  209.29
   3   4   2 1705.88  208.98
  -3   4  -2 1509.83  165.99
   3  -4   2 1875.39  311.29
  -3   4  -2 1837.61  198.32
   2  -3   6  618.98   93.59
  -2  -3  -6  724.19  311.83
   2   3   6  347.68  149.65
  -2   3  -6  502.85   71.26
   6  -1  -5  471.52   66.29
  -6  -1   5  502.30   82.18
   6  -1  -5  431.69  110.40
   6   1  -5  846.95  119.68
   6   1  -5  781.32  129.60
  -4   3  -329881.30  945.34
   4  -3   329114.03  998.07
  -4   3  -329913.82  961.90
   4   3   330010.75 1154.26
  -4  -3  -330118.58 1021.70
   6   0   119213.26  633.98
  -6   0  -118898.90  644.61
   6   0   121820.83  759.00
  -5   0  -4 5202.98  494.15
   5   0   4 4746.06  470.58
  -1  -4  -534558.55 1104.15
   1   4   534766.06 2748.77
   2  -4   4 9622.97  343.24
  -2   4  -410223.05  372.58
  -2  -4  -4 9212.51  494.39
   2   4   410435.43  429.49
   1  -3   718390.63  576.71
  -1   3  -719090.85  599.70
  -1  -3  -717375.50  658.16
   1   3   718422.10  805.05
   2  -1   8 2736.13  287.37
  -2   1  -8 3221.01  323.48
   2   1   8 3069.37  338.05
  -2  -1  -8 2725.73  381.23
   4   0  -920727.94  680.04
  -4   0   925110.36  835.68
   5  -3   0  673.45  134.47
  -5  -3   0  755.87  125.99
  -5   3   0  814.01   92.14
   5   3   0  793.94  122.79
  -3  -1  -7 1753.21  239.69
   3  -1   7 1778.60  239.34
   3   1   7 2333.93  272.56
  -5   0   8 5994.74  568.27
   5   0  -8 4006.26  391.11
   3   3   5 7864.23  381.18
   3  -3   5 8463.00  333.43
  -3   3  -5 7982.82  326.57
  -3  -3  -5 7733.57  342.26
  -4  -2   813011.53  483.13
  -4   2   812572.20  503.83
  -4  -2   812598.70  484.31
   4  -2  -812349.08  427.46
  -5  -3   4 4895.67  467.07
   5  -3  -4 4607.47  459.84
   5   3  -4 4116.00  409.12
  -5  -3   4 5089.72  476.76
   6   0  -6 8295.02  370.70
  -6   0   6 8514.51  329.91
   6   0  -6 6412.03  514.39
   0   5   0   -1.04   57.69
   0  -5   0   33.42   67.62
   0  -5   0   20.86   52.32
  -1   0  -9  442.19  344.74
   1   0   9  320.46  106.98
   2   2  -914797.44  476.94
  -2   2   916534.93  625.96
  -2  -2   916427.74  535.58
   2  -2  -913899.44  543.22
   1  -2  -9 4233.73  413.33
   1   2  -9 4011.12  370.70
  -1   2   9 4502.93  454.91
  -1  -2   9 4848.56  477.46
   0   5  -1 8272.17  329.47
   0   5   1 8045.27  363.77
   0  -5   1 7681.11  297.65
   0  -5  -1 7855.75  338.21
   0  -5  -1 8697.93  356.68
   0  -5   1 8189.74  381.13
  -1   4   6 6590.43  599.47
  -1  -4   6 7290.33  336.54
  -1   4   6 7057.13  280.16
   1  -4  -6 6858.19  585.82
   6  -2  -2 4467.60  544.73
   6   2  -2 4898.58  460.61
  -6  -2   2 4403.45  425.12
  -6   2   2 4826.83  430.63
   6   2  -2 4558.89  451.40
  -4   0  -617462.29  623.93
   4   0   619735.36  739.17
   3   4  -515129.64  472.66
   3  -4  -514890.89  536.42
  -3   4   514998.70  490.03
  -3  -4   514263.32  662.13
  -3   4   515523.78  572.80
   6  -2  -3 1185.56  180.97
   6   2  -3 1683.81  177.93
   6   2  -3 1854.84  265.46
  -6  -2   3 1478.73  194.14
   6   1   110636.74  445.73
   6  -1   110414.24  430.07
  -6  -1  -111435.09  425.81
  -6   1  -110482.39  406.87
   4  -2   5 7186.15  315.95
   4   2   5 5725.56  567.97
  -4  -2  -5 6342.16  542.05
   4   4  -210016.60  385.78
  -4   4   2 8791.97  368.46
   4  -4  -2 9262.78  358.73
  -4  -4   2 9147.13  378.21
  -4   4   210165.47  337.75
  -4  -4   2 9553.24  461.61
   4   4  -1 1849.65  296.50
  -4  -4   1  839.81  143.44
   4  -4  -1  937.72  116.64
  -4   4   1 1802.73  182.31
  -4  -4   1  824.20  306.82
   4  -4  -1 1143.51  166.08
  -5  -2  -323042.07  909.16
   5   2   319689.35  724.27
  -5   2  -320889.92  680.86
   5  -2   324187.48  915.93
  -1  -5   025241.44  890.65
   1  -5   024901.66  967.63
  -1  -5   027152.57  982.77
  -1   5   027469.49 1018.25
   1   5   030155.16 1102.78
   1   3  -8 1832.50  176.62
   1  -3  -8 1272.69  173.64
  -1   3   8 1430.84  215.18
  -1  -3   8 1351.55  149.70
  -5   1  -422510.88  871.37
   5  -1   419511.96  790.56
   5   1   422289.06  856.51
  -5  -1  -421678.62  809.71
  -1  -5   1 2353.31  262.58
   1  -5  -1 2336.59  240.99
  -1  -5   1 2247.21  207.86
   1  -5  -1 2527.87  275.40
   1   5  -1 2384.08  230.33
  -1   5   1 2697.42  322.58
  -4  -1   910964.71  495.78
  -4   1   9 9931.54  441.77
  -4  -1   9 9725.94  429.09
  -2  -3   8 3926.45  322.96
  -2   3   8 3788.74  370.24
   2  -3  -8 4166.85  371.88
  -2  -3   8 3744.67  305.08
  -2   3   8 3578.26  321.44
   6  -2  -1 2871.44  308.10
  -6  -2   1 2815.66  261.43
   6   2  -1 1797.71  230.56
  -6   2   1 1794.08  162.24
   5  -2  -7 3210.31  266.81
  -5  -2   7 2997.04  295.21
  -5   2   7 2516.57  293.52
  -5  -2   7 3443.84  352.06
   5   2  -7 2956.09  284.75
   5  -2  -7 3367.66  275.50
  -5  -1   8 5303.85  455.53
  -5   1   8 5929.01  524.58
   5  -1  -8 5848.79  482.79
   5   1  -8 5714.06  585.26
   5   1  -8 5697.18  529.97
  -5  -1   8 5800.07  534.72
  -2   4   6 5636.17  554.19
   2  -4  -6 5444.26  480.09
  -2   4   6 4430.98  387.30
  -2  -4   6 5586.86  488.24
  -2   0  10 7901.13  395.00
   2   0 -10 6665.83 1078.20
   0  -4   6 8043.24  508.17
   0  -4  -6 8104.05  355.16
   0   4  -6 7611.46  260.74
   0   4  -6 8267.93  280.44
   0   4   6 6977.70  372.01
  -6  -1   613194.36  496.48
   6   1  -614592.89  650.87
   6   1  -612852.31  473.51
   6  -1  -612522.31  427.98
   6  -1  -613889.11  628.77
   4  -4  -3 6305.01  524.64
  -4   4   3 6673.84 1079.94
  -4  -4   3 6124.40  538.82
  -4   4   3 7031.50  268.71
   4   4  -3 7057.91  316.19
  -4  -4   3 6926.97  354.89
   1   1   9 5356.61  488.47
   1  -1   9 3727.89  341.90
  -1   1  -9 4290.05  396.38
  -1  -1  -9 4162.79  376.80
   6  -2  -412164.36  626.13
   6   2  -415066.41  633.29
  -6  -2   413188.66  575.64
   6   2  -413883.65  542.66
   0   5   2 1996.80  217.58
   0  -5  -2 1762.06  193.15
   0  -5   2 1689.66  185.82
   0   5  -2 1982.89  197.47
   0   5  -2 2004.35  186.32
  -1   5  -1  980.95  111.61
  -1  -5  -1  860.10  132.78
  -1  -5  -1 1256.28  275.53
  -1   5  -1 1027.94  133.60
   1  -5   1 1135.94  158.50
  -4  -4   0 4822.75  426.61
  -4   4   0 4892.99  423.14
  -4  -4   0 4115.99  368.35
   4   4   0 4932.74  436.00
   4  -4   0 4923.69  440.03
  -3  -4  -326495.89  991.05
   3   4   326807.00 1036.39
  -3   4  -326476.95  946.30
   3  -4   326517.97  952.52
  -1   0  1023341.93  925.11
   1   0 -1018296.94  686.77
   5  -3   1   30.05   86.98
   5   3   1  177.30  124.25
  -5   3  -1  107.17   74.98
  -5  -3  -1   64.09  120.35
  -3   2   9 8106.99  389.63
   3  -2  -9 9925.47  441.34
  -3  -2   9 9957.61  389.55
  -3  -2   9 8029.61  362.34
  -1  -5   217673.21  630.23
   1  -5  -217753.32  688.07
  -1  -5   217010.00  674.18
  -1   5   216452.35  667.91
  -5   3   5 1379.07  180.23
  -5  -3   5  887.14  125.33
  -5  -3   5  964.31  127.99
   5   3  -5 1425.23  162.23
  -4   1  -6 5555.16  485.99
   4  -1   6 7292.87  362.59
   4   1   6 5797.20  522.65
  -4  -1  -6 6760.02 1094.26
   0  -2  -9 6440.53  565.39
   0   2  -9 6040.83  505.90
   0  -2   9 6084.59  503.34
   0   2   9 7315.71  406.82
   6   0   235313.98 5601.31
   6   0   234271.70 1188.68
  -4  -3   711923.01  439.49
  -4   3   7 9891.12  452.44
  -4  -3   710123.95  460.94
   4  -3  -712273.75  446.22
   4   3  -7 9767.43  392.58
   0  -3   8 6727.75 1072.88
   0   3  -8 7339.54  286.97
   0   3   8 6216.79  559.17
   0  -3  -8 6758.65 1093.29
   6  -2   0 2548.53  309.75
  -6  -2   0 2704.44  258.12
  -6   2   0 4368.86  365.02
   6   2   0 3910.90  366.75
   3   0 -1010642.43  431.39
   2   1 -1012646.54  492.77
  -2   1  1014933.25  662.32
  -2  -1  1013460.80  584.91
   2  -1 -1013323.78  623.25
   4  -3   4 2316.77  321.01
  -4  -3  -4 2313.79  261.50
   4   3   4 1925.49  235.71
  -4   3  -4 2065.06  204.42
   4   4  -4 8267.80  330.92
  -4  -4   4 7546.22  312.68
  -4   4   4 8607.79  403.23
  -4  -4   4 7540.40  357.83
   4  -4  -4 7971.90  302.98
  -4   4   4 8278.21  312.81
  -1  -5  -215287.35  695.04
  -1   5  -215970.47  585.37
   1   5   215026.55  596.95
  -1   5  -215808.40  570.65
   1  -5   216285.32  624.70
   1  -1 -10 9487.12  404.06
  -1  -1  10 9349.76  412.85
  -1   1  1010122.44  455.45
   1   1 -10 7692.13  322.28
  -3   3   8 9129.36  422.56
  -3  -3   8 8592.63  315.79
  -3  -3   8 8269.05  395.68
   3  -3  -8 7904.09  379.79
  -3  -3   8 8513.71  313.45
   6   2  -5 4664.02  400.51
  -6  -2   5 4316.88  446.80
   6   2  -5 4125.19  376.52
   6  -2  -5 5155.10  468.40
   6   0  -722486.06  781.80
   4   4   1 5810.80  517.54
  -4   4  -1 5527.42  469.09
  -4  -4  -1 5944.14  515.58
   4  -4   1 5564.72  487.92
   2   5  -1 5615.03  478.56
  -2  -5   1 6150.32  521.50
  -2   5   1 5512.89  464.14
  -2   5   1 5516.39  477.14
   2  -5  -1 6078.01  552.04
  -2   5   1 5650.76  490.57
  -2  -5   1 6103.29  541.24
  -1   5   3 4361.55  443.88
  -1  -5   3 4510.43  385.03
   1  -5  -3 4608.75  403.87
  -1  -5   3 4513.99  441.28
   1   5  -3 3821.80  335.54
   0  -5   3 9004.40  400.24
   0   5  -3 8308.18  326.26
   0   5   3 8536.05  408.57
   0   5  -3 8830.21  329.75
   0  -5  -3 8644.41  453.15
  -2  -5   0  159.79   62.59
  -2   5   0   67.03   85.75
   2  -5   0  156.96  113.68
  -2   5   0   77.69   41.77
  -2  -5   0  105.55   95.84
  -2   5   0   62.86   85.55
   2   5   0  108.64  100.03
  -6  -1  -2 2152.34  319.90
   6   1   2 2224.67  252.14
   6  -1   2 1802.09  226.38
  -6   1  -2 2655.78  325.06
  -2   4  -5 3282.04  285.09
   2  -4   5 3434.76  297.49
  -2  -4  -5 3224.49  309.91
   2   4   5 3167.81  498.59
   0   0  10 4365.18  406.56
   2   2   8 9192.53  435.22
  -2   2  -810246.18  427.07
   2  -2   810303.25  491.35
  -2  -2  -8 9689.91  522.40
  -3  -4   6 5105.01  407.91
   3  -4  -6 5406.47  459.82
  -3   4   6 5248.66  532.27
   3   4  -6 4841.21  387.52
  -3   4   6 5096.86  421.11
  -3  -4   6 5831.02  505.55
  -2   5   2 1582.21  195.04
  -2  -5   2  896.31  111.64
   2  -5  -2  886.97  125.22
   2   5  -2 1520.32  175.93
  -2   5   2 1770.52  197.76
  -2  -5   2 1051.42  158.85
   3   2   712979.45  559.21
  -3   2  -715300.99  628.93
  -3  -2  -716027.85  814.27
   3  -2   715637.45  633.02
  -3  -1  10 4762.97  433.80
  -3   1  10 6679.30 1088.24
  -3  -1  10 3940.99  356.79
  -1   4  -6 9854.43  361.11
   1   4   6 8920.91  561.73
  -1  -4  -6 9338.94  420.47
   1  -4   6 9528.32  356.16
  -5  -3  -2 1675.43  192.91
  -5   3  -2 1847.38  213.48
   5   3   2 1729.80  250.40
   5  -3   2 1602.10  186.54
  -2   3  -729121.97 1016.48
  -2  -3  -732389.91 1178.65
   2   3   731968.18 1209.74
   2  -3   732783.96 1145.90
   5   0   5  428.51  150.98
  -5   0  -5  512.20  126.32
   2  -5   1 6525.17  555.86
  -2  -5  -1 6910.35 1117.95
   2   5   1 6506.94  570.22
  -2  -5  -1 6615.80  571.10
  -2   5  -1 5788.38  504.66
  -2   5  -1 6613.53  566.46
   6   1  -710231.02  425.63
   6   1  -710978.44  502.43
  -6  -1   711720.05  487.01
   5  -3  -6 9425.56  321.99
  -5   3   6 9919.77  662.36
  -5  -3   611901.54  489.39
  -5  -3   6 8548.42  437.86
   5   3  -611082.46  469.59
   6   2   1 3509.38  355.68
   6  -2   1 4380.08  408.70
  -6   2  -1 3699.94  353.84
  -6  -2  -1 3958.86  357.67
   5   0  -910925.14  437.22
  -5   0   911736.12  516.51
  -3   3  -6  257.77  112.44
  -3  -3  -6  174.88  123.86
   3  -3   6  212.76  183.23
   3   3   6  297.99  446.38
  -5   2  -4 4858.39  418.59
  -5  -2  -4 4903.04  435.23
   5  -2   4 4322.82  401.77
   5   2   4 5011.91  476.20
  -3   0  -814578.27  592.12
   3   0   814737.83  621.92
  -1   4   716957.58  698.90
   1  -4  -717195.45  720.57
  -1  -4   718436.88  726.73
   0  -1 -1018152.84  727.47
   0   1  1014825.91  634.85
   0   1 -1018295.02  739.97
   0  -1  1018468.86  698.23
  -2  -5   3 8902.31  476.73
  -2   5   310286.47  436.29
  -2   5   3 9694.51  430.55
   2   5  -310434.50  398.18
  -2  -5   3 8140.66  316.82
   2  -5  -3 8800.89  381.08
  -4  -4   5 9604.91  385.71
   4  -4  -5 9584.47  383.61
   4   4  -5 8755.68  346.14
  -4   4   5 9228.29  345.04
  -4  -4   5 9227.59  412.68
  -4   4   5 8991.79  438.47
  -3  -4  -4  469.59  108.25
   3  -4   4  363.64  106.79
   3   4   4 1174.65  424.26
  -3   4  -4  603.10  113.24
  -4  -2   916200.57  619.46
  -4  -2   918788.83  696.06
   4  -2  -917197.07  628.54
  -4   2   917573.36  702.56
   1  -5   3  314.72  226.40
  -1   5  -3  454.55   65.36
   1   5   3  431.53  419.59
  -1   5  -3  483.22   95.38
  -1  -5  -3  252.00  100.03
  -5   2   811955.25  531.66
  -5  -2   811206.06  468.45
  -5  -2   811407.56  519.23
   5   2  -813138.19  513.59
   5  -2  -811588.04  421.28
  -2   0  -9 3248.67  316.21
   2   0   9 3160.98  312.69
   6  -2  -611330.85  660.23
   6   2  -612151.33  527.46
  -6  -2   610774.72  482.17
  -6  -2   611552.90  520.19
  -4  -4  -2 7157.96  373.53
  -4   4  -2 9634.36  392.27
   4  -4   2 7629.85  348.91
   4   4   210007.23  484.30
   7   0  -3 4914.01  407.70
   7   0  -3 4646.10  508.50
  -7   0   3 4196.86  378.59
   1  -2   9 7627.98  328.66
  -1  -2  -9 7503.47  455.56
  -1   2  -9 5352.28  463.39
   1   2   9 6292.05  569.32
  -2   4   7 9586.84  410.11
  -2   4   7 9561.89  465.14
   2  -4  -7 8357.44  354.68
  -2  -4   7 8219.57  485.17
   1  -3   8 3024.92  272.72
  -1  -3  -8 3214.88  316.51
   1   3   8 4101.68  465.19
  -1   3  -8 3192.99  289.12
  -7   0   2   36.17   46.93
   7   0  -2   21.30   76.32
   7   0  -2   16.43   80.13
  -4   0  10 1839.10  201.91
   4   0 -10 1994.56  243.44
  -1   5   421482.26  978.37
   1   5  -421395.21  722.46
  -1  -5   422952.73  940.23
   1  -5  -421637.60  786.47
   1   5  -421387.74  723.52
   5   1   5 3600.61  379.17
  -5   1  -5 3317.99  398.06
  -5  -1  -5 2774.61  273.68
   5  -1   5 3032.03  306.08
  -6   0  -312211.22  540.15
   6   0   312496.21  548.15
   4  -2   6 5872.42  510.01
  -4  -2  -6 5472.95  497.68
   4   2   6 6435.65  579.16
   7   0  -4  215.69  106.63
  -7   0   4  132.38   63.57
   7   0  -4  140.83  103.79
   0   5  -4 3707.71  313.02
   0   5  -4 3853.31  332.15
   0  -5   4 4310.35  390.97
   0  -5  -4 4294.10  462.22
   0   5   4 4124.65  390.63
  -2   5  -2  543.95  137.82
   2  -5   2 1120.63  140.73
   2   5   2  760.26  304.27
  -2  -5  -2 1031.77  151.55
  -2   5  -2  677.06  111.98
  -5   1   915364.13  677.60
   5   1  -915429.81  584.27
  -5  -1   914092.39  573.27
   5  -1  -915832.11  592.61
  -5  -1   914240.18  548.14
   0   4   7 6103.23  553.71
   0   4  -7 6658.79 1053.51
   0  -4  -7 6946.10  360.43
   3   1   811834.66  646.10
   3  -1   812503.36  527.27
  -3  -1  -811402.61  504.69
  -4   0  -7  639.27  107.72
   4   0   7  695.24  145.75
   7   0  -1 3293.94  292.21
   7   0  -1 3570.49  420.17
  -7   0   1 3348.67  291.55
  -2   2  10 2931.81  322.48
  -2  -2  10 3816.84  354.21
   2   2 -10 2472.25  260.50
   2   1   9 2952.60  336.13
   2  -1   9 2830.48  288.06
  -2  -1  -9 2853.00  314.23
   4  -3  -8 5626.37  469.11
  -4   3   8 5331.18  483.96
  -4  -3   8 6144.07  503.31
  -4  -3   8 5912.33  537.80
  -4  -3   8 5344.28  451.00
  -7   1   313274.82  468.00
   7  -1  -312157.78  573.27
  -7  -1   310945.27  488.70
   7   1  -312359.72  467.40
   7   1  -312087.52  523.54
   7  -1  -311828.51  428.85
   2  -3  -9 3339.88  311.37
  -2   3   9 4288.90  502.78
  -2  -3   9 3421.52  288.58
  -2  -3   9 3194.35  268.04
   1   3  -9 7539.74  297.43
   1  -3  -9 7713.72  406.96
  -1  -3   9 7273.72  273.86
  -1   3   9 8539.47  497.70
   6   0  -8 1022.85  106.39
   6   0  -8  540.44  117.30
  -7   1   214023.78  501.02
   7   1  -212455.08  469.70
   7   1  -213561.51  633.74
  -7  -1   215546.32  586.70
   7  -1  -213862.04  726.59
  -4  -1  10 3896.31  356.14
  -4   1  10 3853.25  393.69
  -4  -1  10 3939.94  348.10
  -1   2  1020126.76  800.08
  -1  -2  1017661.84  696.12
   1   2 -1017347.83  647.66
   1  -2 -1017332.59  692.43
  -2  -5   4 1645.92  218.64
   2  -5  -4 1717.59  177.63
  -2   5   4 2273.12  253.39
   2   5  -4 2449.67  240.35
  -2   5   4 2715.63  285.98
  -2  -5   4 1744.94  165.08
  -6  -1  -3 9556.94  429.42
   6  -1   311192.78  498.29
   6   1   312952.45  562.64
  -6   1  -310705.37  433.93
   3  -5  -1 9129.79  415.41
  -3   5   110378.80  498.68
  -3   5   1 9419.69  387.08
  -3  -5   1 7680.82  375.08
   3   5  -110090.14  498.32
  -3  -5   1 7599.17  366.79
  -6   3   219034.81  645.22
  -6  -3   221886.48  817.59
  -6   3   220541.55  691.14
   6   3  -219175.03  783.62
   6  -3  -221127.61  849.52
   7   0  -5 9392.87  447.09
   7   0  -510760.54  394.97
   6  -3  -314891.53  656.05
   6   3  -315709.37  675.26
  -6  -3   317790.21  713.64
  -7  -1   414852.62  603.82
   7  -1  -414662.78  734.46
  -7   1   414280.16  496.02
   7  -1  -414844.74  507.80
   7   1  -413115.99  551.56
   7   1  -413796.78  512.95
   4   3   524333.31  956.04
  -4  -3  -522855.97  893.97
   4  -3   519860.54  846.01
   3   5  -219468.67  719.92
   3  -5  -219723.51  722.64
  -3   5   220881.33  797.72
  -3   5   217901.57  654.40
  -3  -5   219718.32  814.43
  -3  -5   217688.58  654.57
   1   0  1014005.91  656.31
  -1   0 -1014128.80  604.90
   6   2   2 5478.30  579.28
   6  -2   2 5026.10  510.31
  -6  -2  -2 5382.88  467.83
  -6   2  -2 5545.57  476.33
  -5   3  -3 1709.06  174.26
   5  -3   3 2406.21  324.34
  -5  -3  -3 2572.86  287.11
   5   3   3 2064.08  251.57
  -3  -5   018162.56  719.31
  -3   5   017672.59  676.59
   3   5   014382.06  585.69
  -3   5   017196.34  627.53
  -3  -4   711250.40  488.06
   3  -4  -712183.28  476.78
  -3   4   712005.99  458.51
   5   4  -212702.49  609.52
  -5   4   212790.83  471.23
   5  -4  -213101.80  559.12
  -5  -4   212081.10  517.75
  -6  -3   117418.21  763.39
   6  -3  -116511.38  701.20
  -6   3   120079.90  692.99
  -6   3   118486.21  643.39
   6   3  -121291.67  845.17
   5  -3  -7 1346.12  129.67
  -5  -3   7 1370.39  246.00
  -5   3   7 1735.37  284.51
  -5  -3   7 1403.11  151.00
   5   3  -7 1692.62  173.72
  -4  -1  -7 7688.76  373.12
   4   1   7 8943.13  457.48
  -4   1  -7 8322.10  504.63
   4  -1   7 7090.67  349.77
  -7  -1   111673.61  464.61
   7   1  -110488.20  426.10
   7   1  -110629.18  493.94
  -7   1   1 9881.65  373.87
   7  -1  -111563.53  536.24
  -3  -2  10 5789.34  477.83
   3  -2 -10 5676.64  531.03
  -3   2  10 6643.05 1093.32
  -3  -2  10 6368.09  530.34
  -4   4   610032.44  403.78
  -4  -4   6 7551.52  486.17
  -4   4   610050.79  459.70
   4   4  -610553.94  406.86
   4  -4  -6 9778.73  372.51
   1  -5   416966.56  689.04
   1   5   417505.66  736.36
  -1   5  -418010.21  641.46
  -1   5  -417229.93  622.22
  -1  -5  -417440.26  682.02
   5  -4  -119093.37  820.31
  -5  -4   118179.81  760.85
   5   4  -116204.95  689.05
  -5   4   118177.50  649.81
   6  -3  -414029.70  739.46
  -6  -3   413888.92  612.22
   6   3  -414212.04  566.06
  -7   0   0  161.52  127.72
   7   0   0  144.84  101.38
   7   0   0  112.49  104.18
   5  -4  -317269.44  718.92
  -5  -4   314675.18  646.61
  -5   4   314286.44  508.01
   5   4  -313978.53  572.28
  -5  -4   315067.97  616.14
   2  -4   6 7507.52  344.56
   2   4   6 7424.24  381.26
  -2  -4  -6 7243.23  486.41
  -2   4  -6 7754.57  310.39
   6  -1  -814198.27  501.02
   6   1  -814094.46  526.39
   6  -1  -816591.67  680.27
   6   1  -816258.16  685.66
  -6  -1   818026.55  698.61
  -3  -5   312245.86  532.26
   3  -5  -310958.28  426.76
  -3   5   311812.74  566.22
  -3  -5   311203.79  436.74
   3   5  -311124.88  438.62
  -3   5   310949.81  439.89
  -4   4  -3  894.91  115.61
  -4  -4  -3  494.65  363.37
   4  -4   3  404.30  302.72
   4   4   3  892.24  148.39
   6   2  -7 2062.23  335.14
  -6  -2   7 2924.60  280.37
   6  -2  -7 2465.77  292.48
  -6  -2   7 2485.62  246.43
   3  -3  -9 5736.66  486.00
  -3  -3   9 6054.26  493.84
  -3  -3   9 6391.63  556.16
  -3  -3   9 5920.19  483.89
  -3   3   9 5466.20  505.72
  -2   0  11 7145.42  473.17
  -2  -5  -3 5182.84  463.30
   2  -5   3 5146.22  466.57
  -2   5  -3 4776.22  402.22
   2   5   3 4858.97  455.34
  -2   5  -3 4983.64  435.53
  -7   1   513859.97  469.58
   7  -1  -515685.15  655.57
   7   1  -515594.98  661.07
   7   1  -513121.62  523.11
   7  -1  -515262.32  519.53
   0  -3  -912923.21  571.88
   0   3   910240.25  502.38
   0   3  -911421.97  440.89
   0  -3   913120.24  477.00
   1   5  -5 6483.63  507.20
   1  -5  -5 6631.07  556.53
  -1  -5   5 6740.66 1093.81
  -1   5   5 6044.63  590.82
   1   5  -5 6688.37 1057.45
   1  -1  10 8495.54  377.33
   1   1  1010994.15  506.50
  -1  -1 -10 9792.92  429.55
  -3   5  -1 1475.47  201.78
   3  -5   1 1367.81  154.09
   3   5   1 1642.13  204.45
  -3  -5  -1 1270.94  185.40
  -3   5  -1 1776.74  187.72
   0  -2  10 4985.69  427.68
   0   2 -10 6130.63  518.66
   0  -2 -10 5206.76  554.24
   0   2  10 5360.31  512.98
  -1   4  -723530.69  817.61
   1   4   721917.30  908.55
  -1  -4  -720052.01  838.82
   1  -4   720205.99  701.44
  -1   0  1111408.59  518.41
   6   3   0 7696.47  383.63
  -6   3   0 7757.94  305.43
   6  -3   0 7767.81  412.87
  -6  -3   0 9162.50  451.75
  -5  -4   0 9687.27  465.92
   5  -4   0 9548.64  440.68
   5   4   010330.85  467.84
  -5   4   0 9623.57  372.32
   3  -4   523771.36  864.02
  -3   4  -523852.71  855.31
   3   4   524180.26 1005.98
  -3  -4  -523104.86  907.59
   7   0  -6 2762.14  251.43
  -7   0   6 3389.45  297.41
   7   0  -6 3116.91  342.00
   0   5  -5 7930.65  289.53
   0   5   5 5996.62  566.23
   0  -5  -5 8453.57  389.36
   0   5  -5 8269.30  297.36
   0  -5   5 8534.35  402.14
   5  -4  -414164.01  499.39
   5   4  -416479.72  640.64
  -5   4   414385.37  666.30
  -5   4   416253.62  555.46
  -5  -4   415089.37  620.95
  -5  -4   414794.24  643.56
  -3   0  1121124.90  802.59
  -7  -1   011667.67  494.90
   7   1   010217.48  633.89
  -7   1   011369.23  433.40
   7  -1   011506.25  651.34
  -5  -2  -514317.88  601.27
   5   2   512731.63  588.68
  -5   2  -512581.40  505.09
   5  -2   515787.83  642.96
   6  -3  -5 9978.81  463.90
  -6  -3   5 9549.62  406.72
  -6  -3   511331.62  501.63
   6   3  -5 8980.41  446.31
  -2  -5   5 9416.70  429.34
   2  -5  -5 9281.96  419.66
  -2   5   510760.27  595.98
   2   5  -510130.05  345.42
  -2   1  1112555.50  604.25
   2   1 -1115278.51  576.91
  -2  -1  1115456.28  627.16
   2  -1 -1115890.88  617.98
   5   0   613871.16  647.74
  -5   0  -615216.93  638.31
  -6   0  -445580.75 7213.66
   6   0   442657.40 6760.96
  -5  -2   9 5089.69  471.48
  -5  -2   9 4798.88  427.60
  -5   2   9 4439.07  416.36
  -5  -2   9 4926.44  455.36
   5  -2  -9 5403.84  442.80
  -3   5   414993.42  826.49
  -3  -5   415621.21  641.77
  -3  -5   416002.77  580.98
   3   5  -415473.46  562.35
   3  -5  -415252.42  622.99
  -3   5   415478.00  578.37
  -1   4   810135.44  488.76
   1  -4  -8 7657.15  360.27
  -3  -2  -8  586.81  233.02
   3   2   8  192.75  310.85
   3  -2   8  464.19  104.57
   5   0 -10 5200.56  459.77
  -5   0  10 3954.82  370.90
  -2  -3  -8 2635.33  270.76
  -2   3  -8 2951.02  264.19
   2   3   8 2221.11  262.91
   2  -3   8 2459.56  271.48
  -1   1  11 5422.41  516.63
  -1  -1  11 3367.87  339.94
   1   1 -11 4605.39  428.42
   1  -1 -11 4737.69  558.55
   2  -4  -8 4183.11  388.02
  -2  -4   8 4336.66  409.34
  -2   4   8 3831.65  394.11
   3  -3   713887.24  638.91
  -3  -3  -711559.85  506.69
  -3   3  -711574.08  501.17
  -7   0  -1  787.96  118.04
   7   0   1  758.83  169.67
   7   0   1  755.74  116.39
  -2   2  -913698.71  557.03
   2  -2   914575.07  598.38
   2   2   914864.38  683.90
  -2  -2  -912763.09  548.68
   7  -1  -6 5000.01  459.63
   7  -1  -6 4582.67  366.19
  -7  -1   6 5678.04  481.54
   7   1  -6 4345.61  414.03
   7   1  -6 4960.46  418.29
   7  -2  -3 4802.70  559.12
   7   2  -3 4290.85  480.78
  -7  -2   3 3893.77  345.88
  -7   2   3 4227.90  337.07
  -3  -1  11 8683.09  434.10
  -3   1  11 9808.07  451.68
   3  -1 -11 7838.67  351.86
   3   5   213686.30  662.19
  -3   5  -214278.86  587.35
  -3  -5  -213603.44  580.14
   3  -5   213616.19  554.67
  -7   2   211988.14  422.00
   7   2  -212909.68  563.55
   7  -2  -211656.22  540.23
  -7  -2   2 9914.03  453.89
  -4   2  10 7277.68  373.45
  -4  -2  10 7974.97  346.25
   4  -2 -10 8183.63  361.41
  -4  -2  10 8033.33  399.19
  -5   4  -116844.01  621.26
   5  -4   115537.33  661.84
  -5  -4  -116951.86  717.06
   5   4   117982.66  889.62
  -6  -2  -3 2811.07  331.52
   6   2   3 2912.15  304.26
   6  -2   3 2505.32  266.30
  -6   2  -3 2878.42  284.09
  -5  -4   512527.86  491.81
  -5  -4   511036.39  477.21
   5   4  -512008.81  513.39
  -5   4   512792.65  450.33
   5  -4  -510460.79  379.75
  -5   4   512074.01  538.59
   5  -1   616616.56  682.93
   5   1   618048.16  746.07
  -5   1  -616949.36  684.69
  -5  -1  -616759.13  726.25
  -6  -3  -119528.54  753.04
   6   3   115528.87  671.52
   6  -3   118707.02  744.04
  -6   3  -116532.66  685.98
   7  -2  -412736.21  611.46
  -7  -2   413930.29  626.27
   7   2  -412541.05  598.42
   6   1   4 4804.14  471.04
   6  -1   4 4706.26  460.82
  -6   1  -4 5089.36  512.96
  -6  -1  -4 4632.04  512.56
  -6   0   913754.02  632.16
   6   0  -913061.04  568.87
   0   0  11 6673.48  622.91
  -4   4   7 7911.61  360.57
   4  -4  -7 6195.89  541.88
  -4  -4   7 6178.91  570.62
  -4  -4   7 6496.30  550.83
   4   4  -7 7847.14  342.63
  -4   4   7 8378.59  446.35
   5   3   4 1136.69  244.03
  -5  -3  -4 1405.04  265.93
   5  -3   4 1436.79  273.82
   1   5   5 1431.54  286.18
  -1   5  -5 1321.15  246.53
   1  -5   5 1102.01  226.72
  -1  -5  -5 1195.14  231.77
  -1   5  -5 1363.63  227.75
  -5  -1  10 1732.55  307.94
   5  -1 -10 1566.63  287.10
  -5   1  10 1600.07  353.89
   2  -5   4 6487.62  584.53
   2   5   4 5955.50  552.27
  -2   5  -4 6221.54  536.94
  -2  -5  -4 6224.54  569.89
  -2   5  -4 5654.66  497.44
   0   4   8 3969.73  424.00
   0  -4  -8 4291.45  409.83
   0  -4   8 4273.55  358.11
   0   4  -8 4321.66  364.99
  -4  -3   9 2967.92  505.90
  -4  -3   9 2791.86  464.39
  -4   3   9 2903.54  507.25
   4  -3  -9 2932.74  482.38
  -4  -3   9 3111.17  516.79
   4   2   710373.28  544.43
   4  -2   711883.53  575.22
  -4  -2  -711456.99  580.13
   7  -2  -110304.81  518.72
  -7   2   1 9624.17  417.42
   7   2  -1 9633.75  491.21
  -7  -2   1 9248.39  451.01
   7   1   1 9836.42  554.31
  -7   1  -1 9974.15  443.38
  -7  -1  -110521.78  509.29
   7  -1   1 9515.07  490.56
  -5  -3   818069.30  787.16
   5   3  -817325.47  764.35
  -5   3   814090.04  671.93
   5  -3  -817538.76  710.93
  -5  -3   817001.68  809.85
  -6  -3   611112.74  559.14
  -6  -3   6 9192.34  459.27
  -7   0   7 4221.47  378.59
   7   0  -7 3783.50  349.74
   7   0  -7 3933.93  387.35
   3   0   9 1893.69  366.63
  -3   0  -9 2257.72  405.81
  -1   3  -910090.69  469.46
  -1  -3  -910357.48  525.60
   1   3   910883.01  725.83
   1  -3   910646.65  477.11
   4  -4   4 7610.83  426.24
  -4  -4  -4 8421.88  479.51
   4   4   4 9318.30  541.06
  -4   0  11 5762.30  528.65
   6   2  -8 7046.69  632.27
  -6  -2   8 6575.71  582.16
  -6   2   8 7768.62  499.98
  -6  -2   8 6026.09  624.48
   6  -2  -8 5967.93  500.30
   6  -2  -8 6099.28  512.48
  -3   4   8 2994.02  523.15
   3  -4  -8 3805.41  371.61
  -3  -4   8 3824.68  375.68
  -3   4   8 2829.12  475.62
  -1   5   616557.55  810.83
   1  -5  -618408.91  790.27
  -1  -5   617940.52  875.65
   4   3   6  500.44  379.89
   4  -3   6  237.78  233.77
  -4  -3  -6  331.22  390.81
  -3  -5   514615.07  699.38
   3  -5  -515819.01  693.75
  -3   5   513100.90  626.61
   3   5  -513186.99  534.23
  -3  -5   515068.91  617.82
  -3   5   512825.45  566.69
   7  -2  -5 3221.10  437.16
  -7  -2   5 3288.91  320.78
   7   2  -5 3779.33  365.19
   4  -5  -2 3707.34  333.99
  -4   5   2 3996.17  386.20
  -4  -5   2 3753.40  410.24
  -4  -5   2 3024.22  530.56
   4   5  -2 4693.77  463.61
  -4   5   2 4398.51  394.99
  -1  -2 -10 5257.74  522.66
   1   2  10 5339.11  517.32
   1  -2  10 5526.69  496.20
  -1   2 -10 4671.41  430.62
   6  -1  -9 7957.43  349.88
   6   1  -9 9278.55  428.24
   6   1  -910253.27  503.72
   0  -1  11 7287.24  909.69
   0  -1 -11 6998.55  639.19
   0   1  11 8817.43  469.62
   4   5  -1 6114.21  566.59
   4  -5  -1 5707.35  515.44
  -4   5   1 3640.54  360.56
  -4   5   1 5752.75  500.04
  -4  -5   1 5618.62  603.59
  -2   0 -10 6089.56  559.16
   2   0  10 5399.72  502.16
  -4   0  -814052.35  643.00
   4   0   814557.07  707.05
   2  -5  -6 3412.34  323.12
  -2   5   6 2561.33  574.32
  -2  -5   6 2902.17  503.71
  -2   3  10 5136.63  510.69
  -2  -3  10 5241.92  471.85
  -2  -3  10 5036.06  432.45
   2  -3 -10 5338.16  511.92
   0  -5  -613720.89  631.89
   0   5   612529.66  634.37
   0   5  -611291.58  439.81
   0   5  -612424.77  482.71
   0  -5   613640.54  678.31
   7   1  -717231.75  942.96
  -7  -1   718929.69  798.42
   7   1  -716095.07  676.76
   7  -1  -717074.30  875.00
   7  -1  -716655.75  664.90
  -4  -5   3 3784.50  377.54
  -4  -5   3 4613.99  476.88
  -4   5   3 5371.51  500.47
   4  -5  -3 4498.61  395.86
  -4   5   3 5119.92  448.06
   4   5  -3 5269.16  489.69
   3  -1   9 7153.69  914.46
   3   1   9 6916.81  631.07
  -3  -1  -9 6565.97  597.55
  -3   1  -9 6456.70  592.44
   7  -2   0 5927.31  555.64
   7   2   0 4641.21  461.96
  -7   2   0 5866.17  510.17
  -7  -2   0 6023.65  545.97
  -4   1  1116803.24  766.73
  -4  -1  1119119.88  816.55
  -4  -1  1118190.76  780.92
  -5  -4  -2 2630.65  450.81
   5   4   2 2668.64  467.97
  -5   4  -2 2236.86  384.51
   5  -4   2 2603.89  446.71
   4   5   0 2453.51  471.51
  -4   5   0 2165.95  393.24
  -4   5   0 2113.60  350.60
  -4  -5   0 1708.45  353.47
   4  -5   0 1929.79  333.56
   3   5   3  320.28  275.60
  -3   5  -3  261.82   89.89
   3  -5   3   69.27   55.67
  -3  -5  -3  177.74  165.90
  -2  -4  -713484.21  628.97
   2   4   711527.56  662.89
  -2   4  -713368.14  575.49
   2  -4   713074.86  581.58
   1  -3 -10 9260.42  466.61
   1   3 -10 9715.67  417.98
  -1  -3  10 8619.69  368.70
   7   0   2  254.72  375.39
  -7   0  -2  269.37  187.24
  -2   2  11 5147.96  558.13
   2   2 -11 6131.53  565.47
  -2  -2  11 6045.35  530.37
   2  -2 -11 5785.90  611.02
  -5  -4   6 8010.00  432.39
   5   4  -6 7633.25  361.40
   5  -4  -6 7070.93  600.68
  -5  -4   6 7356.67  890.02
  -5   4   6 7385.33  560.02
  -5   4   6 7708.17  324.86
  -6  -3  -2 2927.37  624.14
   6  -3   2 2763.99  475.11
   6   3   2 2196.15  463.66
   3  -4   6 1770.35  315.00
   3   4   6 1800.95  338.67
  -3  -4  -6 1725.97  320.83
  -3   4  -6 2107.98  354.83
   2  -1  1014894.10  669.54
  -2  -1 -1013362.70  629.14
   2   1  1014738.05  690.12
  -1   2  11 6234.04  724.58
   1   2 -11 8304.53  378.25
  -1  -2  11 9755.67  543.81
   1  -2 -11 8506.05  419.07
  -4  -1  -8 6709.23  631.69
   4   1   8 6137.08  581.21
   4  -1   8 6660.92  607.60
  -4   1  -8 5509.67  508.72
  -3   3  10 5407.10  568.00
   3  -3 -10 6284.55  561.66
  -3  -3  10 6041.87  514.91
  -3  -3  10 6534.71  555.87
  -7  -2   623178.07  974.02
   7   2  -619418.25  858.08
   7  -2  -622773.18 1059.99
   0   6   027301.91 1147.05
   0  -6   031409.30 1344.91
   0  -6   029714.95 1242.91
  -3  -2  11 8598.82  404.42
   3  -2 -11 8596.58  404.17
  -3  -2  11 8638.14  427.77
  -3   2  1110247.02  548.09
   4  -5  -4 3191.22  528.86
  -4  -5   4 2905.22  499.04
  -4  -5   4 2845.88  477.09
   4   5  -4 3809.57  362.63
  -4   5   4 3653.71  333.78
  -4   5   4 3735.89  441.67
   1  -4   8 9628.93  409.14
  -1  -4  -8 9035.30  509.76
  -1   4  -810532.02  445.55
   1   4   810879.80  598.43
   7   1   217590.13  852.06
   7  -1   217298.69  821.05
  -7   1  -217619.24  797.99
  -7  -1  -217811.48  777.29
   0  -6   1  555.88  151.87
   0   6  -1  201.84   75.75
   0  -6  -1  500.46  155.97
   0   6   1  411.11  116.16
   0  -6   1  464.87  106.48
  -6   3   7 5601.15  529.19
  -6  -3   7 5032.45  450.36
  -6  -3   7 4823.44  466.11
   6   3  -7 4574.54  440.85
  -4   5  -1 2214.07  379.21
   4  -5   1 2915.13  580.31
   4   5   1 2070.96  371.32
  -4  -5  -1 2810.83  487.80
  -6   0  -5 3237.61  497.55
   6   0   5 3385.68  370.32
   5   2   6 2731.24  488.25
  -5  -2  -6 2773.46  492.75
  -5   2  -6 2621.87  457.66
   5  -2   6 2968.38  509.76
   6   2   4 3326.29  404.56
  -6  -2  -4 2830.31  486.60
  -6   2  -4 3313.03  318.73
   6  -2   4 2455.63  430.39
  -1   0 -11 2174.45  392.77
   1   0  11 2247.14  506.40
  -1  -6   0  221.66  160.92
  -1   6   0  253.50  196.84
  -1   6   0  125.49  143.24
   1   6   0  135.95   93.38
   1  -6   0  222.24   93.07
  -1  -6   0  317.74  125.74
   7   0  -8 5107.11  647.94
   7   0  -8 5583.46  489.82
  -2  -5  -5 7912.81  474.02
   2  -5   5 8229.71  388.54
   2   5   5 6797.13  626.58
  -2   5  -5 7022.37  611.14
   1   6  -1  390.35  105.71
   1  -6  -1  418.65  161.00
  -1   6   1  440.82  231.32
  -1  -6   1  294.13  167.12
  -1  -6   1  353.55  279.14
  -5  -2  10 8382.74  416.86
  -5   2  10 8867.13  469.67
   5  -2 -10 8086.74  369.28
  -5  -2  10 9484.02  466.86
   0   3  10 1766.16  353.88
   0  -3 -10 2384.90  414.43
   0   3 -10 1644.02  285.84
   0  -3  10 2148.65  372.54
  -3  -5   616706.24  796.54
  -3  -5   615983.33  623.95
  -3   5   616702.69  705.59
   3   5  -617876.55  693.74
   3  -5  -615935.89  677.49
  -7   2  -112773.81  579.84
  -7  -2  -111146.49  530.71
   7   2   113032.92  629.76
   7  -2   111265.29  566.42
  -1   5  -616162.37  658.31
   1  -5   616486.50  769.02
   1   5   615620.58  795.47
  -1   5  -616713.22  677.20
  -1  -5  -617656.46  814.01
   4  -4  -8 6597.34  572.28
  -4   4   8 6097.21  534.38
  -4   4   8 7052.90  747.66
  -4  -4   8 6210.89  534.24
  -4  -4   8 6063.06  513.67
  -4  -4   8 5632.52  630.86
   5   0   7 3553.96  376.55
  -5   0  -7 3615.47  401.43
  -2  -4   9 4708.57  456.85
   2  -4  -9 4063.20  391.50
  -2   4   9 4659.62  485.65
   0  -6  -237930.86 1560.10
   0   6  -235056.76 1415.72
   0  -6   237609.17 1559.08
   0   6  -238774.28 4598.78
   0   6   241557.10 4943.96
  -1   6  -1   79.60   83.40
  -1   6  -1   72.67   86.76
   1   6   1  119.60  160.07
   1  -6   1   42.82   69.19
  -1  -6  -1   31.28   83.56
  -1   4   9 5570.60  704.24
   1  -4  -9 6420.84  576.16
  -2   0  12 4421.16  422.75
   5  -3   5 3559.15  360.93
  -5  -3  -5 3270.91  471.14
   5   3   5 3046.33  530.15
  -6   1  -5 6109.39  625.85
   6   1   5 6407.01  610.17
  -6  -1  -5 5738.95  532.19
   6  -1   5 5927.51  674.43
   1  -6  -2 1236.99  236.41
   1   6  -2 1790.36  327.66
  -1  -6   2 1121.10  251.53
  -1  -6   2 1348.79  235.97
  -1   6   2 1555.53  323.84
   6   4  -2 4881.82  465.68
  -6   4   2 4497.41  384.83
  -6  -4   2 6482.12  595.01
  -6   4   3 3921.45  337.67
   6   4  -3 3984.70  381.05
   6  -4  -3 4406.48  476.17
  -6  -4   3 4502.57  428.19
  -5   0  1112868.23  673.68
  -4  -4  -5 8054.63  421.15
   4   4   5 8702.05  512.68
   4  -4   5 7847.40  440.56
  -6   0  10   91.04  113.91
   6   0 -10  201.84   98.67
   5  -3  -9 1023.42  197.65
  -5  -3   9 1249.38  260.63
  -5  -3   9 1341.67  255.85
  -5   3   9 1308.20  290.70
  -6  -2   9 4634.86  441.72
  -6   2   9 3462.31  535.60
   6   2  -9 5115.91  472.88
   6  -2  -9 3554.04  312.94
   6  -2  -9 3639.10  331.93
   0   2 -11 6106.63  556.09
   0  -2 -11 5238.00  495.82
   0  -2  11 4985.97  446.08
   0   2  11 6524.81  616.77
   1   1  11 6893.99  640.86
  -1  -1 -11 6993.90  631.55
   1  -1  11 5746.74  526.88
  -5  -4  -313053.69  624.89
   5  -4   313636.76  635.53
   5   4   311447.47  579.97
   7   1  -8 2766.89  454.49
   7  -1  -8 2365.00  431.31
   7  -1  -8 1985.66  325.57
  -7  -1   8 2072.21  371.92
   7   1  -8 2868.87  492.32
  -3  -3  -8  177.76  194.63
  -3   3  -8  151.95  121.42
   3  -3   8  172.03  149.58
   3   3   8  168.43  218.96
  -1   5   7 3716.15  391.42
   1  -5  -7 3718.12  352.67
  -1  -5   7 4121.84  404.51
   4   5  -5 3031.28  511.90
   4  -5  -5 2284.29  379.52
  -4   5   5 3010.21  581.42
  -4   5   5 2667.81  436.10
  -4  -5   5 1878.29  317.16
  -4  -5   5 2073.36  366.26
  -3  -5  -417881.86  873.66
  -3   5  -417818.55  756.49
   3  -5   418120.19  838.72
   3   5   416676.38  831.56
  -3   0  12 6521.43  613.11
   6  -4  -1 2374.62  473.79
  -6   4   1 1953.52  326.31
   6   4  -1 2610.42  447.41
  -6  -4   1 2358.79  407.19
  -5  -4   7 7209.78  872.27
  -5  -4   7 7444.49  420.69
  -5   4   7 7673.03  332.25
   5  -4  -7 7390.31  321.17
   5   4  -7 7291.88  889.30
  -5   4   7 6633.96  700.94
   8   0  -314084.14  715.00
  -8   0   315749.89  666.23
   8   0  -313962.47  602.56
  -2  -3  -913701.74  665.56
   2   3   912085.00  618.18
  -2   3  -912672.77  566.07
   2  -3   913717.74  657.45
  -1   0  1216506.33  770.65
  -4  -5  -2 2655.59  466.45
   4   5   2 3572.30  359.99
   4  -5   2 2791.72  488.66
  -7  -2   7 4816.96  464.76
   7   2  -7 5280.44  493.80
   7  -2  -7 5158.46  532.58
   7   3  -3 2327.94  413.40
  -7  -3   3 2295.84  497.02
   7  -3  -3 1973.28  360.39
   3   2   9 8291.15  458.33
   3  -2   9 8439.50  449.58
  -3  -2  -9 8280.58  452.15
   6  -4  -4 5131.01  493.88
   6   4  -4 5752.97  525.43
  -6   4   4 5730.04  475.65
  -6  -4   4 6589.03  620.16
   5  -1   7 2954.04  509.70
   5   1   7 2937.18  742.69
  -5  -1  -7 2828.47  498.81
  -5   1  -7 2800.64  476.90
   2  -5  -7 2779.43  470.65
  -2  -5   7 2645.61  471.49
  -2   5   7 2331.48  471.20
  -8   0   412951.62  544.90
   8   0  -414023.45  587.78
   8   0  -413328.56  729.68
  -4   2  11 9403.32  623.34
  -4  -2  11 9182.43  424.29
  -4  -2  11 9253.63  436.36
   4  -2 -11 9068.60  488.13
   7  -3  -2   75.16  157.44
  -7   3   2   26.98   66.97
  -7   3   2   64.11   33.95
  -7  -3   2  136.27   91.92
   7   3  -2   31.33   76.85
   7   0   3 1388.36  314.52
  -7   0  -3 1297.44  277.58
   4  -3 -10 7773.73  376.17
  -4  -3  10 7436.10  346.70
  -4  -3  10 8150.60  372.25
  -4   3  10 9959.00  510.50
   1   6   2 3469.93  597.77
  -1   6  -2 2955.47  495.51
   1  -6   2 2625.63  497.44
  -1  -6  -2 2644.81  486.23
  -1   6  -2 3613.41  380.46
  -8   0   210731.71  467.37
   8   0  -2 8929.42  593.96
   8   0  -2 9175.24  419.85
   2  -1 -1210481.57  507.60
  -2   1  12 9608.34  498.63
  -2  -1  1210918.29  513.19
   6  -3   3 7036.27  662.15
  -6  -3  -3 7685.83  402.23
   6   3   3 8919.17  488.42
  -3   4   9 6244.52  590.07
  -3   4   9 3853.86  379.20
   3  -4  -9 4369.46  404.14
  -3  -4   9 4112.50  604.16
   2  -6  -1 4084.71  392.11
  -2  -6   1 4116.11  403.71
   2   6  -1 4150.18  415.78
  -2   6   1 3923.99  383.46
  -2  -6   1 3445.98  345.42
   7   3  -4 1143.37  349.38
   7  -3  -4  753.76  245.11
  -7  -3   4  740.63  299.30
  -5   1  11 6321.24  584.51
   5  -1 -11 4262.36  399.13
  -5  -1  11 5255.47  516.77
   0  -4   9 5086.33  432.79
   0  -4  -9 5020.43  470.85
   0   4  -9 3664.97  314.54
   0   4   9 3738.90  409.59
  -1  -6   3 1048.99  181.74
   1  -6  -3 1151.86  218.66
   1   6  -3 1373.80  251.68
  -1  -6   3 1197.82  240.86
  -1   6   3 1632.21  349.96
   0   6   3 1175.18  250.81
   0   6  -3 1030.85  186.31
   0  -6   3 1266.77  255.48
   0  -6  -3 1160.59  254.82
   0   6  -3 1216.85  212.83
  -6  -1  10 5774.58  550.20
   6  -1 -10 4010.18  357.49
  -6   1  10 4648.71  457.82
  -2   6   022243.01  947.02
   2  -6   022716.05  968.27
   2   6   023441.62 1020.40
  -2  -6   023980.72 1098.69
   0  -5   7 4077.80  401.93
   0   5   7 3165.62  588.72
   0  -5  -7 3706.86  359.90
   2  -2  10 6121.49  555.16
  -2  -2 -10 5294.83  501.90
   2   2  10 6085.88  641.24
  -2  -6   225042.68 1134.33
   2  -6  -224272.91 1021.88
  -2  -6   224948.21 1020.80
  -2   6   223568.71 1017.48
   2   6  -222711.87  953.95
  -3   1  12 4268.28  443.65
   3  -1 -12 3868.72  373.75
  -3  -1  12 4506.46  480.07
   8   0  -528921.98 1325.03
   8   0  -528832.06 1149.84
  -8   0   533045.99 1306.28
   4  -3   717502.86  770.92
   4   3   719389.32  909.32
  -4  -3  -717187.28  855.43
  -6   4   0 3695.54  326.24
   6  -4   0 4900.99  502.40
   6   4   0 4333.49  443.69
  -6  -4   0 4722.16  478.15
  -7  -3   1  553.45  122.21
   7  -3  -1  572.38  149.15
  -7   3   1  545.65  101.06
   7   3  -1  763.21  216.89
  -7   3   1  622.39  147.64
   4   2   8 3614.70  389.78
   4  -2   8 2989.83  608.32
  -4  -2  -8 3012.04  537.01
  -8   1   3 4246.70  376.00
   8   1  -3 5077.05  515.40
   8  -1  -3 3533.18  470.57
   8   1  -3 4546.00  407.14
  -8  -1   3 2856.62  478.89
   1  -1 -12 2576.60  445.50
  -1  -1  12 2817.66  483.77
  -1   1  12 3198.13  557.60
   8   1  -4 3186.43  545.48
   8  -1  -4 3629.07  390.17
   8  -1  -4 3475.66  307.13
   8   1  -4 2987.53  499.08
  -8   1   4 3029.68  496.63
  -8  -1   4 3363.11  345.80
  -6  -3   8 7548.52  389.24
   6  -3  -8 7057.03  584.47
  -6  -3   8 6893.11  651.93
   6   3  -8 8933.22  450.19
  -6   3   8 6740.41  635.80
   6  -3  -8 6598.81  545.53
   8   0  -112643.27  552.31
  -8   0   113756.27  605.01
   8   0  -113219.13  669.96
  -7   1  -3 7331.04  909.19
  -7  -1  -3 7556.89  383.54
   7   1   3 6914.90  646.53
   7  -1   3 7624.71  457.65
   8   1  -2 4986.40  520.65
  -8  -1   2 4478.53  409.66
  -8   1   2 4549.41  412.84
   8  -1  -2 4732.17  465.88
  -6  -4   5 2665.86  470.08
   6   4  -5 3077.02  519.57
  -6   4   5 3132.53  543.06
  -6  -4   5 3033.56  549.17
   7   2   2 2741.55  481.43
   7  -2   2 2592.64  455.74
  -7   2  -2 3139.36  525.04
  -7  -2  -2 3063.81  665.08
  -2   6  -1  578.84  123.82
   2   6   1  553.67  135.13
  -2   6  -1  678.88  147.92
  -2  -6  -1  522.68  351.57
   2  -6   1  473.48  158.13
   7  -3  -5 2169.19  436.60
   7   3  -5 2040.07  380.09
  -7  -3   5 2406.28  415.68
   1   3  10 8726.76  502.83
  -1  -3 -10 9093.72  499.88
  -1   3 -10 9349.23  449.93
   1  -3  10 8462.27  390.60
  -4   0  12 2005.83  404.93
   3  -5  -712452.10  558.51
  -3   5   710623.49  667.37
  -3   5   710039.92  452.55
  -3  -5   711679.51  579.88
   2   6  -3 6735.61  588.96
  -2   6   3 7703.87  437.05
   2  -6  -3 6579.00  600.69
  -2  -6   3 6205.17  551.07
  -2  -6   3 6070.26  558.91
   2   4   8 4570.72  486.91
  -2  -4  -8 5078.69  496.56
  -2   4  -8 4994.68  435.10
   2  -4   8 5430.65  487.10
   1   6   3   82.39   96.05
  -1   6  -3   73.13   61.00
  -1   6  -3   67.20   78.61
   1  -6   3   49.87   73.22
  -1  -6  -3   63.06  105.44
  -5  -5   214660.04  712.13
  -5   5   213099.08  634.82
   5   5  -213998.10  687.40
  -5   5   212638.19  540.14
   8   1  -5 2008.29  339.15
   8  -1  -5 1501.98  496.39
  -8   1   5 2121.72  344.28
   8   1  -5 2263.10  410.67
   8  -1  -5 1920.36  316.04
  -8  -1   5 2190.26  368.75
   7   0  -9 8025.12  379.67
   3   4   714673.17  802.78
   3  -4   714726.93  688.34
  -3  -4  -714566.58  764.29
  -3   4  -715772.27  668.13
   4   5  -6 3410.89  310.35
   4  -5  -6 4142.78  371.90
  -4   5   6 3166.07  661.11
  -4  -5   6 3645.55  343.36
  -4  -5   6 4271.26  413.38
  -4   5   6 3432.07  309.19
   0   0  12 4288.26  439.48
  -3   0 -1012139.70  592.73
   3   0  1011570.68  606.31
   5   5  -1 5928.85  554.02
  -5  -5   1 4436.97  434.47
  -5   5   1 5371.91  472.77
   5  -5  -1 4419.55  430.28
  -7   3   0  896.81  166.40
   7   3   0  852.62  261.43
  -7  -3   0  775.56  175.55
   7  -3   0 1007.61  268.27
  -7   3   0  802.38  222.29
   5  -5  -310346.78  487.81
  -5   5   310453.95  450.02
  -5  -5   3 9066.74  513.55
   5   5  -311175.89  522.81
  -5  -5   310833.30  584.57
  -5   5   312814.39  658.92
  -2  -5  -6 8949.28  475.40
   2   5   6 8952.25  499.59
   2  -5   6 9094.44  426.82
  -2   5  -6 8835.03  395.22
  -8   0   6 4005.78  379.73
   8   0  -6 4462.07  475.93
   8   0  -6 4470.46  400.07
  -8  -1   1 3625.21  348.90
   8  -1  -1 3728.68  388.95
   8   1  -1 3293.24  352.89
  -8   1   1 3538.16  327.11
   1   6  -4 4230.47  384.29
  -1   6   4 3994.27  421.93
  -1  -6   4 3781.85  378.78
   1  -6  -4 3489.16  350.15
   1   6  -4 4154.23  372.23
   4   5   3 4255.21  528.72
  -4  -5  -3 4539.28  439.10
   4  -5   3 4972.33  487.35
   2  -3 -11 2849.04  485.60
  -2   3  11 2425.37  433.62
  -2  -3  11 1919.70  318.34
  -2  -3  11 2759.89  453.67
  -6   2  -5 1863.37  430.84
  -6  -2  -5 2298.75  398.12
   6  -2   5 2422.84  432.78
   6   2   5 2011.28  387.87
  -6  -4  -1 1063.29  238.27
  -6   4  -1 1168.15  216.18
   6   4   1 1116.77  243.27
   0   6   423791.74 1043.15
   0   6  -425472.43 1006.91
   0  -6  -424613.47 1115.07
   0  -6   424932.09 1075.35
   0   6  -424669.85  987.07
   4   0   9  239.32  206.10
  -4   0  -9  161.05  242.51
  -2  -6  -220986.81  935.88
   2  -6   221548.02  931.46
  -2   6  -221756.87  924.15
   2   6   222285.72  991.72
  -2   6  -222130.05  911.01
   1   2  11 8245.66  684.53
   1  -2  11 8694.08  422.26
  -1  -2 -11 8885.97  458.07
  -1   2 -11 8650.18  412.83
  -8   0   0 8347.62  437.63
   8   0   0 8383.05  526.72
  -4   1  12 1257.18  257.43
  -4  -1  12 1147.74  223.76
   7   2  -813205.58  651.85
  -7  -2   813556.55  621.21
   7  -2  -814400.79  761.19
   5   4   4 2346.70  430.52
  -5  -4  -4 1068.92  262.35
   5  -4   4 1075.49  250.22
  -6   0  -632283.10 1354.12
   6   0   630506.57 1308.30
   1   5   7  953.22  651.50
  -1  -5  -7  974.20  400.46
  -1   5  -7  802.07  142.71
  -4  -4   9 5039.54  432.51
  -4  -4   9 5495.82  650.75
  -4   4   9 5122.02  657.08
   4  -4  -9 5263.45  475.86
  -4  -4   9 5379.74  459.28
  -1   3  11 7777.01  476.35
   1   3 -11 6108.98  528.35
  -1  -3  11 6038.78  548.48
   1  -3 -11 6515.80  626.68
   7   1  -911034.04  485.40
  -7  -1   9 9459.75  464.10
   7   1  -9 8718.95  472.32
   7  -1  -910196.88  438.81
  -5  -5   015196.79  750.51
   5   5   015745.50  803.63
  -5   5   015709.20  672.08
   5  -5   013614.83  741.56
   2   0  11 3805.07  380.28
  -2   0 -11 4017.29  404.93
   5   4  -8 3365.69  323.96
   5  -4  -8 3752.19  349.69
  -5   4   8 3482.55  434.17
  -5  -4   8 3864.48  413.83
  -5  -4   8 3867.87  372.34
  -3   5  -5 1461.19  251.40
   3   5   5 1273.56  262.22
   3  -5   5 1131.30  292.41
  -3  -5  -5 1167.68  302.46
   0  -1  1216418.71  738.38
   0   1  1215703.73  905.92
   0  -1 -1215737.23  735.63
   7  -3  -6 4815.08  475.68
   7   3  -6 4545.19  427.06
  -7  -3   6 4800.15  453.41
  -5   5   411224.21  567.46
  -5  -5   411455.54  583.39
  -5  -5   411295.74  509.43
   5   5  -410394.33  554.81
   5  -5  -411619.37  505.20
  -5   5   410728.52  468.94
  -3   1 -10 9287.85  484.89
   3   1  10 9053.79  573.81
  -3  -1 -10 8677.14  448.70
   3  -1  10 9268.05  523.18
  -6   4   6 5923.97  633.09
  -6  -4   6 5227.64  493.54
   6   4  -6 5579.18  540.82
  -6  -4   6 5740.87  553.02
   1   4   912952.86  703.74
  -1  -4  -911918.19  608.36
  -1   4  -911540.32  491.24
   1  -4   911922.31  522.92
   5   2   7 9733.45  538.87
  -5  -2  -710100.52  686.16
   5  -2   710704.02  528.77
  -5   2  -7 9856.44  661.90
  -3  -3  11 5542.49  483.17
  -3   3  11 4537.59  475.75
   3  -3 -11 5440.70  505.78
  -3  -3  11 5072.85  461.30
  -8   1   6 6004.06  503.92
   8   1  -6 7087.20  610.82
   8   1  -6 6431.44  592.88
   8  -1  -6 6615.91  552.89
  -8  -1   6 6915.69  627.38
   8  -1  -6 6994.96  647.26
  -2  -6   422727.53  994.58
   2   6  -424964.67  991.08
   2  -6  -423732.19 1041.22
  -2  -6   423847.75  960.46
  -2   6   423269.78 1068.43
   2  -2 -12 6527.72  585.21
   2   2 -12 5400.33  475.50
  -2  -2  12 7502.02  376.19
  -2   2  12 5575.03  537.79
  -3   6   1  172.92  126.57
  -3  -6   1   79.13   84.83
   3  -6  -1  144.37   94.36
   3   6  -1   89.52  154.39
  -3  -6   1   77.21  160.13
   4   4   6 4274.95  440.66
  -4  -4  -6 6310.28  586.27
   4  -4   6 5943.88  559.51
  -5  -3  -6 2078.26  380.65
   5   3   6 2103.45  503.76
   5  -3   6 1951.96  354.53
   5  -2 -11 6271.88  546.31
  -5   2  11 4878.32  474.76
  -5  -2  11 5984.32  532.19
  -5  -2  11 7211.58  881.14
   4   1   9 4930.85  487.49
   4  -1   9 4571.77  446.52
  -4   1  -9 5038.63  477.00
  -4  -1  -9 4710.65  459.10
  -6  -2  1013282.86  603.86
  -6  -2  1012160.60  656.54
  -6   2  1012147.94  715.17
   6  -2 -1013023.60  558.40
   6  -2 -1012164.79  525.28
   6   3   4 3648.93  597.42
   6  -3   4 2407.75  483.17
  -6  -3  -4 2686.41  466.00
   3   6  -2 1762.85  305.48
  -3  -6   2 1461.60  314.21
   3  -6  -2 1671.94  331.28
  -3  -6   2 1548.01  306.49
  -3   6   2 1692.44  312.00
  -8  -1   0 1415.98  266.85
  -8   1   0 1798.13  306.69
   8  -1   0 1424.15  351.44
   8   1   0 1957.17  370.05
  -7   0  -4 4574.75  449.30
   7   0   4 4442.35  448.01
  -1  -5   8 7899.97  448.29
   1  -5  -8 7659.19  403.44
  -1   5   8 8256.16  620.94
  -6   1  -6 9272.57  504.47
   6  -1   6 9865.21  512.73
   6   1   6 9828.40  568.92
  -6  -1  -6 9903.05  502.66
  -5  -3  1019560.47  825.40
  -5  -3  1020268.00  873.01
  -5  -3  1019180.41  884.42
   5  -3 -1019523.27  815.42
  -5   3  1015975.20  845.69
  -3  -6   0  481.12  391.00
   3  -6   0  400.11  320.24
   3   6   0  381.61  247.19
  -3   6   0  370.25  107.52
   3  -2 -12 4792.48  510.65
  -3  -2  12 4697.43  506.11
  -3  -2  12 5615.20  560.56
  -3   2  12 5651.93  618.13
  -2   5   8 4928.21  663.23
   2  -5  -8 5008.49  509.31
  -2  -5   8 5315.54  567.42
   2  -1  11 4315.29  452.99
   2   1  11 5119.61  546.27
  -2  -1 -11 4669.80  493.39
   8  -2  -3 3016.52  427.57
  -8  -2   3 3398.34  354.73
  -8   2   3 3507.89  338.20
   8   2  -3 3193.40  449.00
   7  -3   1  269.34  156.46
  -7   3  -1  500.57  123.11
   7   3   1  734.75  447.22
  -7  -3  -1  367.74  124.60
   2  -4 -10 3158.35  345.51
  -2   4  10 3290.88  393.86
  -1   6  -4 4006.44  412.34
  -1  -6  -4 3543.11  454.38
   1   6   4 3541.77  403.87
  -1   6  -4 3547.26  387.75
   1  -6   4 3781.24  408.15
  -1  -2  1210946.12  687.14
  -1   2  12 9009.02  634.34
   1  -2 -12 9384.53  602.52
   1   2 -12 8638.10  561.46
   8   0  -717459.82 1170.11
   8   0  -717009.47  998.63
  -8   0   720315.74 1197.93
  -6   0  11 5913.80  604.70
   6   0 -11 4928.39  537.73
  -8  -2   4 4950.01  503.60
   8   2  -4 5443.12  570.04
   8  -2  -4 4981.86  539.46
   7   2   312156.90  830.18
   7  -2   314947.97  974.50
  -7   2  -313222.17  817.44
  -7  -2  -315212.56  974.75
   1  -4 -10 4404.15  460.81
  -1   4  10 4852.45  537.00
   5  -5   1 4159.37  448.12
  -5  -5  -1 4280.19  456.63
   5   5   1 5179.68  649.17
   8  -2  -2  991.84  205.23
   8   2  -2 1349.41  240.36
  -8  -2   2 1133.46  208.12
  -8   2   2 1279.88  168.06
   3   6  -3  170.64   80.66
  -3  -6   3  200.99  111.54
  -3   6   3  120.43  190.15
   3  -6  -3  167.96  178.22
  -5   0  -810002.53  647.75
   5   0   811048.33  734.64
  -2   6  -3  661.17  182.17
   2  -6   3  651.14  140.76
  -2  -6  -3  793.49  210.06
  -2   6  -3  626.59  105.43
   2   6   3  719.51  150.19
  -5  -5   5 6005.45  943.20
  -5   5   5 6481.62  399.74
   5  -5  -5 5178.12  504.12
  -5  -5   5 6517.27  454.12
   5   5  -5 6793.40  444.28
  -5   5   5 8431.18  569.26
  -1  -6   5 2145.14  317.74
   1   6  -5 2248.09  277.44
   1  -6  -5 2067.85  290.64
   1   6  -5 2162.18  275.44
  -1   6   5 2211.40  334.60
  -6  -3   9 2789.42  472.18
   6  -3  -9 2831.24  448.41
  -6  -3   9 3116.42  341.71
   6   3  -9 3534.83  388.49
  -6   3   9 3639.01  428.33
   0   3  11 5727.34  611.36
   0   3 -11 5725.96  557.30
   0  -3  11 5626.17  549.89
   0  -3 -11 5496.64  566.37
   6  -4   2 4341.01  467.85
  -6   4  -2 4555.59  476.16
   6   4   2 5330.77  611.65
  -6  -4  -2 4104.67  443.12
   7   1   413859.17 1021.40
   7  -1   413856.64  930.48
  -7  -1  -414048.20  916.14
  -7   1  -414820.99  913.92
   8   0   113491.00  879.81
  -8   0  -114317.35  910.62
   3   6   1  718.44  145.67
  -3  -6  -1  679.99  158.21
   3  -6   1  584.90  116.71
  -3   6  -1  605.16  173.34
  -4  -5   7 3518.62  346.40
  -4   5   7 3850.89  386.61
  -4   5   7 3774.02  464.87
   4  -5  -7 4228.91  421.78
  -4  -5   7 3981.52  459.61
   4   5  -7 3526.60  342.42
  -5   0  12 3306.30  364.55
   0   5   8 8905.06  645.40
   0  -5  -8 8895.92  589.94
  -8  -2   5 5829.64  631.27
   8   2  -5 6030.82 1019.59
   8  -2  -5 5619.77  674.40
   3  -4 -10 1192.94  278.48
  -3  -4  10 1427.61  232.69
  -3   4  10 1620.42  294.20
   0   6  -5 1637.53  216.04
   0   6   5 2412.09  449.47
   0  -6   5 1399.28  433.64
   0   6  -5 1868.54  232.66
   0  -6  -5 1528.80  233.41
   8   1  -7 8775.40  588.21
  -8  -1   7 9242.37  580.26
   8  -1  -7 8347.63  486.82
   8   1  -7 8428.51  520.51
   8  -1  -7 8942.74  604.37
   7   3  -7  563.09  120.40
  -7  -3   7  443.68  266.01
  -6  -1  1111807.60  828.33
   6  -1 -1112163.68  737.56
  -6   1  1110136.11  711.29
   3  -3   913364.87  837.26
  -3  -3  -913508.79  871.30
   3   3   917409.57 1108.77
   4  -5   4 4766.34  493.05
  -4  -5  -4 4213.74  599.62
   4   5   4 5026.99  550.88
  -4   3  11 2133.39  454.09
  -4  -3  11 1850.91  245.85
  -4  -3  11 1793.49  252.58
   4  -3 -11 1769.16  245.90
   8  -2  -1 2556.53  445.22
  -8  -2   1 2843.37  464.67
  -8   2   1 3027.48  314.96
   8   2  -1 2948.22  365.74
  -1   0 -1225382.77 3918.67
   1   0  1228754.91 4432.78
   3  -5  -8 9097.57  604.88
  -3   5   813571.90  878.76
  -3  -5   810107.91  671.70
   6   4  -7 2297.55  311.95
  -6   4   7 2354.21  356.49
   6  -4  -7 1563.65  190.29
  -6  -4   7 1691.99  249.93
  -6  -4   7 1236.34  181.25
   2   6  -5 7437.78  438.35
  -2  -6   5 9209.32  622.69
  -2   6   5 8638.75  605.95
   2  -6  -5 8525.41  553.99
   2   6  -5 7781.59  462.32
  -5   1  -811529.19  734.36
   5  -1   813158.30  883.52
  -5  -1  -813183.60  842.08
   5   1   811291.40  759.40
  -3   6   4 3064.07  354.37
   3  -6  -4 3622.19  375.48
  -3  -6   4 3240.32  449.68
   3   6  -4 3313.16  345.65
  -3  -6   4 3207.97  321.42
  -7   0  10 1594.05  243.81
   7   0 -10 1707.01  248.25
   2   3  10 1404.81  263.57
   2  -3  10 1235.10  185.00
  -2   3 -10 1418.70  255.25
  -2  -3 -10 1234.28  283.32
  -4   2  12 8714.03  649.39
  -4  -2  1210680.85  722.52
   4  -2 -12 9900.05  617.02
  -4  -2  1210001.77  614.39
  -8  -1  -1 8368.72  560.74
   8   1   1 6714.70  603.12
  -8   1  -1 7203.75  511.21
   8  -1   1 7419.49  528.23
  -5   1  12 2632.88  364.65
  -5  -1  12 2968.66  327.68
   0  -4  10 4993.16  479.91
   0  -4 -10 4694.83  634.52
   0   4 -10 5893.31  558.49
   0   4  10 5212.59  568.36
  -2   0  13 1341.27  220.57
   7  -2  -9 7232.69  425.84
  -7  -2   9 7371.72  509.08
   7  -2  -9 8421.36  489.01
  -7   2   9 7043.08  506.04
   7   2  -9 8629.58  565.09
   4   3   8  800.38  216.39
   4  -3   8  726.47  189.14
  -4  -3  -8  851.46  184.69
   0  -2 -12 6073.59  505.30
   0   2  12 6416.14  487.33
   0  -2  12 5760.54  579.68
   0   2 -12 5992.57  944.85
   3  -2  10  470.79  156.11
  -3  -2 -10  559.18  151.42
   3   2  10  969.21  210.45
  -3   0  1322241.61 3453.34
   3  -6   2 1333.32  220.75
  -3  -6  -2 1308.09  215.89
  -3   6  -2 1457.82  240.74
   3   6   2 1535.47  248.27
  -8  -2   6 4068.61  517.20
   8   2  -6 5121.95  532.53
   8  -2  -6 4236.56  472.63
   5  -5   215333.36 1002.53
  -5  -5  -216611.97 1039.51
   5   5   216152.66 1050.41
  -2   5  -7 5793.62  557.37
  -2  -5  -7 4972.60  523.11
   2   5   7 5905.73  619.87
   2  -5   7 5006.95  512.53
  -1  -1 -12 2114.68  345.46
   1   1  12 2528.24  368.40
   1  -1  12 2101.33  329.16
   5   4   5 9563.63  834.02
  -5  -4  -510633.79  773.74
   5  -4   5 9790.63  631.66
  -7  -3  -2  857.28  188.52
   7  -3   2  997.33  196.12
   7   3   2 1132.42  200.23
  -7   3  -2 1083.74  169.17
   5  -5  -6 7847.02  506.33
  -5   5   6 9009.17  556.33
  -5  -5   6 9583.66  638.54
  -5  -5   6 8130.21  540.60
   5   5  -6 8613.53  540.36
  -5   5   6 9063.35  627.86
   8   0  -8 1430.94  236.50
  -8   0   8 1517.80  225.32
   8   0  -8 1478.68  232.87
   4  -2   915191.18  994.61
   4   2   913128.51  848.30
  -4  -2  -915467.25  961.92
  -5  -4   9 5401.64  537.54
  -5   4   9 6887.91  498.28
   5  -4  -9 5939.08  580.70
  -5  -4   9 5851.49  611.32
   7  -1 -10 1108.61  158.01
  -7   1  10 2100.79  332.52
   7   1 -10 1749.76  288.10
   8  -2   0  276.35  138.16
   8   2   0  339.44  269.60
  -8   2   0  318.50   84.62
  -8  -2   0  258.56  221.55
   3   5   613740.08  905.04
  -3  -5  -615366.65  964.31
  -3   5  -613070.18  794.56
   3  -5   614568.33  893.03
  -1  -6  -5  358.84  118.37
  -1   6  -5  414.37   74.28
  -1   6  -5  421.92  171.16
   1   6   5  369.35  333.81
   1  -6   5  422.87  181.72
  -1   0  1311863.35  838.62
   6  -2   6 3529.35  411.85
  -6  -2  -6 3775.67  410.46
   6   2   6 4028.70  466.90
  -6   2  -6 4346.55  540.52
   3  -4   8 3515.64  422.67
   3   4   8 3043.83  386.15
  -3  -4  -8 3773.53  461.35
  -3   4  -8 3066.20  323.28
  -2   6  -414356.56  854.66
   2  -6   415805.42  972.86
  -2   6  -415055.91  886.17
  -2  -6  -415413.06  968.09
   2   6   414546.57  943.53
  -2  -1  1318253.93 1120.79
   2  -1 -1319172.62 1160.30
  -2   1  1315049.85  957.25
   2  -2  1113268.45  893.98
  -2  -2 -1112874.76  859.72
   2   2  1115175.86  968.92
  -2   4  -9 6991.61  448.62
   2  -4   9 5524.30  568.69
  -2  -4  -9 6032.58  973.42
   2   4   9 6447.04  502.70
  -7  -4   3 5923.73  603.62
   7   4  -3 5668.20  587.23
   7  -4  -3 5817.73  610.44
  -7   4   3 5363.61  503.67
  -7   4   3 5329.41  500.47
  -3   1  13 3380.48  393.95
   3  -1 -13 2522.18  344.14
  -3  -1  13 2622.01  438.47
  -1   5  -8 9765.39  572.49
   1   5   8 8245.96  598.99
  -1  -5  -8 8554.73  578.83
   1  -5   8 8844.44  532.63
   7  -4  -2 9372.14  652.57
  -7   4   210140.34  606.61
   7   4  -2 9431.38  682.89
  -7  -4   2 9149.88  615.06
  -7   4   211450.41  665.87
  -4  -4  10 8929.33  528.15
  -4  -4  10 9010.94  533.90
  -4   4  10 8317.81  579.37
  -4  -4  10 9638.48  656.35
   4  -4 -10 8462.51  605.08
  -8   0  -214270.34  869.31
   8   0   214388.74 1147.43
  -6  -4  -3 1273.83  237.97
   6   4   3 1438.40  367.93
   6  -4   3 1236.25  198.49
   6   3   512610.07  836.02
  -6  -3  -512596.25  822.73
   6  -3   512338.66  849.27
   1  -6  -6 4800.91  520.14
  -1   6   6 4703.44  520.58
  -1  -6   6 4990.61  552.83
   3   6  -5 1311.79  173.91
  -3  -6   5 1316.73  367.00
   3  -6  -5 1679.08  315.67
  -3   6   5 1453.29  386.45
  -3  -6   5 1633.44  214.66
   8  -1  -8 5789.36  744.24
   8   1  -8 5460.89  550.43
  -8  -1   8 7046.33  455.05
   8   1  -8 6184.24  455.69
   8  -1  -8 5130.66  485.59
   7  -4  -413381.44  928.05
   7   4  -413849.12  874.65
  -7  -4   411937.86  784.81
  -4   6   210591.18  690.39
   4   6  -2 9452.09  644.90
  -4  -6   212603.48  826.90
   4  -6  -212335.41  753.75
  -4  -6   1 4882.71  517.73
   4  -6  -1 4809.77  531.22
  -4   6   1 5853.08  600.02
   4   6  -1 6487.21  455.35
  -6   0  -7  966.12  177.32
   6   0   7  903.24  207.43
   1   3  1111284.63  767.72
  -1   3 -1111077.81  672.06
   1  -3  1110926.37  678.40
  -1  -3 -1111272.80  745.18
   7  -2   4 4173.36  484.84
  -7  -2  -4 3845.39  414.26
  -7   2  -4 4112.83  424.90
   7   2   4 4141.51  467.79
  -7  -3   8 7749.32  524.57
   7   3  -8 7873.15  652.87
  -7   3   8 7247.56  512.18
   7   0   5  127.12  135.26
  -7   0  -5  120.38   82.68
  -1  -1  13 1760.92  273.20
   1  -1 -13 1577.77  249.05
  -1   1  13 1814.15  344.84
  -4   0  13  540.39  324.07
  -4  -4  -7 7014.75  526.64
   4   4   7 8806.30  608.48
   4  -4   7 6654.18  538.64
   7  -4  -1 8605.49  642.55
  -7  -4   1 9193.15  642.24
  -7   4   110355.82  611.02
   7   4  -110503.08  693.51
  -2  -6   621102.42 1318.59
  -2   6   623671.61 3680.18
   2  -6  -621429.86 3303.08
  -4   5   8 1777.74  265.27
   4  -5  -8 1059.11  163.93
  -4  -5   8 1093.87  139.30
  -4   5   8 1751.48  290.76
  -4  -5   8 1095.64  256.64
   0  -6   615986.62 1031.60
   0  -6  -616012.33  999.14
   0   6  -616486.09  936.19
   0   6   619160.10 1199.64
   0   6  -617286.67  980.20
   8  -2  -7 4395.62  483.05
  -8  -2   7 4756.57  554.71
   8   2  -7 4327.74  545.77
   6  -2 -11 2960.48  317.22
   6  -2 -11 2692.99  365.42
  -6  -2  11 3342.79  354.37
  -6   2  11 3668.26  434.63
  -4  -6   3 6432.66  631.54
  -4  -6   3 5620.04  556.45
   4  -6  -3 6514.93  418.64
   4   6  -3 7043.62  497.98
  -4   6   3 6167.44  440.83
   5  -3   7 6587.20  462.05
   5   3   7 5032.41  574.01
  -5  -3  -7 6427.29  539.89
  -2  -5   9 4351.65  486.36
  -2   5   9 4022.51  543.64
   2  -5  -9 4234.38  441.39
   1  -5  -9  861.76  160.36
  -1   5   9 1213.84  255.34
   6  -4  -8 9241.09  539.92
   6   4  -8 7822.65  515.81
  -6  -4   8 9131.76  606.89
  -6   4   8 9733.31  656.21
  -6  -4   8 8494.25  537.34
   4   6   015556.15  975.45
  -4  -6   016765.10 1045.04
   4  -6   014999.04  984.96
  -4   6   015545.53  952.11
   3   6   3  221.68  139.27
   3  -6   3  285.12  236.69
  -3   6  -3  330.61  213.67
  -3  -6  -3  319.05  285.22
  -3   6  -3  218.07   78.42
  -8  -1  -2 2325.23  459.82
   8  -1   2 2071.08  380.50
  -8   1  -2 2772.14  479.17
   8   1   2 2614.28  383.46
  -2  -3  12 1880.02  249.88
  -2   3  12 1604.79  310.44
   2  -3 -12 1844.74  274.46
  -2  -3  12 1756.34  261.69
   5  -2   8 2230.45  336.41
   5   2   8 2171.58  361.24
  -5  -2  -8 1850.05  386.64
  -5   2  -8 2280.60  403.84
   6  -5  -2 7656.68  543.39
  -6   5   2 9569.14  580.84
   6   5  -2 9004.85  668.81
  -6  -5   2 8960.01  624.73
  -7  -4   5 3268.03  369.41
   7   4  -5 3127.41  365.29
   7  -4  -5 3157.83  395.99
  -6   5   3 2066.18  259.97
  -6  -5   3 2217.27  346.19
  -6   5   3 2002.90  313.81
   6   5  -3 2427.50  346.53
   5  -3 -11 1822.84  245.90
  -5  -3  11 1597.86  246.19
  -5  -3  11 1750.38  241.20
  -5   3  11 1756.16  314.71
   4   5   5 3507.16  466.89
   4  -5   5 4260.36  441.98
  -4  -5  -5 3895.23  425.87
  -3   0 -11 2696.69  380.99
   3   0  11 1869.47  286.93
  -6   3  10 9168.40  627.73
   6  -3 -10 8260.21  505.91
  -6  -3  10 8262.68  558.40
  -6  -3  10 9431.06  585.38
   1  -4  10 3119.98  325.84
  -1  -4 -10 3168.54  418.88
   1   4  10 3116.38  418.95
  -1   4 -10 3127.76  328.54
   6  -1   7 5110.56  546.63
  -6  -1  -7 5265.41  560.97
  -6   1  -7 5694.17  705.86
   6   1   7 6049.45 1022.40
   4   0  1015993.24 1072.87
  -4   0 -1013993.14  893.72
  -5  -5  -3 1299.02  270.51
   5  -5   3 1555.06  234.03
   5   5   3 2064.00  326.82
  -8  -2  -1 4494.41  467.40
  -8   2  -1 5047.25  536.09
   8  -2   1 4726.49  637.70
   8   2   1 5584.02  597.42
  -7   1  -5 3399.15  461.35
  -7  -1  -5 2681.47  370.59
   7   1   5 3532.71  634.23
   7  -1   5 2939.26  363.72
  -4  -1  1315824.43  978.05
   4  -1 -1315601.20  988.99
  -4   1  1316291.22 1074.38
  -5  -2  12 3475.10  377.34
  -5  -2  12 2512.61  326.76
  -5   2  12 4164.52  574.91
   5  -2 -12 2976.22  313.00
   3  -3 -1211256.93  712.38
  -3   3  1211108.67  763.03
  -3  -3  1211345.42  691.32
  -3  -3  1210616.60  642.36
   6  -5  -1 2801.75  609.07
  -6   5   1 3433.81  359.38
  -6  -5   1 2847.46  358.44
   6   5  -1 2909.60  516.44
   5   5  -7 6212.31  405.24
  -5  -5   7 5495.80  568.42
  -5  -5   7 4864.69  487.73
   5  -5  -7 4750.84  465.83
  -5   5   7 6300.54  479.02
  -5   5   7 6143.39  391.55
   0   0  13 1170.06  215.56
   0   0 -13 1035.68  228.18
  -8  -3   3 4083.50  428.07
   8   3  -3 3495.99  414.65
   8  -3  -3 3945.02  447.89
   1   3 -12 9388.34  571.79
  -1   3  1211358.47  795.12
   1  -3 -1210663.31  722.55
  -1  -3  1210786.44  644.69
  -6   5   4 7885.60  539.90
  -6   5   4 6713.81  408.01
   6   5  -4 7637.50  521.09
  -6  -5   4 7070.47  493.21
  -8  -3   411861.09  740.62
   8  -3  -412138.13  793.84
   8   3  -411673.04  799.95
  -6   0  12  809.22  283.41
  -7   4   0 5292.69  515.09
   7  -4   0 5634.50  595.47
  -7  -4   0 5808.84  752.75
   7   4   0 5699.85  607.87
  -4   6   4 9041.65  563.91
  -4  -6   4 8903.48  671.91
  -4  -6   4 8806.62  560.13
  -4   6   4 9778.44  650.01
   4   6  -4 8511.61  530.13
   4  -6  -4 9814.17  625.62
   7  -3   3  536.30  271.84
   7   3   3  721.82  197.30
  -7   3  -3  850.97  161.00
  -7  -3  -3  594.02  374.60
   1  -2  12 1734.71  255.24
   1   2  12 1715.19  359.63
  -1  -2 -12 1976.92  342.40
  -8   3   212261.94  710.07
   8   3  -212873.27  838.31
  -8  -3   213523.65  885.50
  -8   3   212828.41  738.41
   8  -3  -212764.69  833.97
  -3   5   9 5975.50  995.68
   3  -5  -9 5813.31  616.54
  -3  -5   9 6058.51 1066.00
  -2   4  11 3361.00  516.05
   2  -4 -11 4099.85  439.22
   4  -6   1 2022.90  417.18
  -4   6  -1 2355.96  346.06
   4   6   1 1518.18  384.23
  -4  -6  -1 1834.18  390.21
   8   0  -916433.13 1227.91
   8   0  -916705.85  976.56
  -3   1 -1111182.74  903.47
   3   1  1111454.49  772.07
  -3  -1 -1110755.66  850.05
   3  -1  1111555.65  763.18
   0   5   9 2749.30  642.18
   0  -5  -9 2559.92  355.02
   7  -2 -10 8377.43  497.30
   7  -2 -10 9419.95  562.44
  -7   2  1010050.74  671.12
  -7  -2  10 8456.07  564.88
   7   2 -10 7530.55  523.86
  -4   1 -1012742.57  832.43
   4   1  1014447.42  924.04
   4  -1  1012791.57  825.10
  -4  -1 -1012509.09  799.36
  -2   6  -5  538.47  108.71
   2   6   5  456.95  154.24
  -2   6  -5  622.10  122.35
   2  -6   5  517.82  131.13
  -2  -6  -5  600.98  156.21
   2   0  12 4521.11  482.47
  -2   0 -12 4877.36  571.50
   2   2 -13 4712.76  470.58
   2  -2 -13 3567.34  382.89
  -2  -2  13 3898.59  425.65
   3   6  -6 2525.61  306.16
  -3  -6   6 2411.47  294.53
  -3  -6   6 2624.02  385.26
   3  -6  -6 2849.32  306.56
  -3   6   6 2668.77  388.04
  -1   4  11 5479.58  591.22
  -1  -4  11 4739.26  448.77
   1  -4 -11 4846.39  501.64
   8   3  -5 2213.48  314.81
  -8  -3   5 2288.95  319.60
   8  -3  -5 2244.03  352.80
  -6   5   0 3380.08  346.57
   6   5   0 2972.70  341.78
  -6  -5   0 3417.75  402.10
   6  -5   0 3437.29  388.27
   0  -1  13 9771.06  644.25
   0  -1 -13 9520.10  631.96
   0   1  13 9129.69  626.97
  -7   0  1113810.70  882.73
   7   0 -11 9174.10  572.37
  -1   6  -6 5638.67  545.28
   1   6   6 5503.35  851.10
   1  -6   6 5999.36  964.82
  -1  -6  -6 5690.78  586.28
  -1   6  -6 5474.45  527.04
  -7   4   6 8327.49  590.33
   7   4  -6 8891.40  580.19
  -7  -4   6 7657.85  540.13
  -9   0   4  469.10  105.99
   9   0  -4  299.59  163.22
   9   0  -4  269.35  119.42
  -9   0   3 1812.11  260.46
   9   0  -3 1438.89  255.08
   9   0  -3 1521.94  216.28
   3  -4 -11 4018.75  423.69
  -3   4  11 4125.59  639.78
  -3   2  13 7834.05  555.27
   3  -2 -13 7361.76  499.00
  -3  -2  13 7984.55  531.69
  -3  -2  13 7555.30  584.15
  -6  -1  12 1536.51  228.25
  -6   1  12 1651.14  387.51
   6  -1 -12 1178.46  183.50
   5   0   9 2266.77  345.86
  -5   0  -9 2234.33  324.96
   8  -3  -111212.82  768.07
  -8  -3   1 9502.00  670.21
   8   3  -111123.15  945.04
  -8   3   110510.15  624.72
  -8   3   1 9679.34  591.70
   6   5  -5 2304.02  325.43
  -6   5   5 2401.23  378.50
   6  -5  -5 2933.31  302.83
  -6  -5   5 2576.30  366.19
  -6   5   5 2187.27  271.03
  -8   0  -3 8032.51  547.13
   8   0   3 7219.66  703.70
   5   4   6  975.87  214.10
   5  -4   6 1044.43  255.66
  -5  -4  -6 1099.14  218.06
  -8  -1   914093.07  865.68
   8  -1  -915965.38  917.01
   8  -1  -914868.67  952.79
   8   1  -913989.13  877.76
   8  -2  -8 3523.78  641.64
  -8  -2   8 3570.34  515.02
   8   2  -8 3825.71  562.78
   6  -4   4 4870.64  522.95
   6   4   4 4102.24  475.67
  -6  -4  -4 5292.96  562.05
   9   0  -5 3421.29  402.05
  -9   0   5 4918.78  504.71
   9   0  -5 5195.29  505.73
  -5   0  1317615.60 1203.59
   9   0  -2   45.56   52.48
   9   0  -2   34.71  138.75
  -9   0   2   25.35  124.25
  -4   3  12 7691.63  551.83
   4  -3 -12 4966.52  521.47
  -4  -3  12 5748.26  565.06
  -4  -3  12 5635.82  556.89
   1  -2 -13 8738.68  580.34
  -1  -2  13 8892.55  569.54
  -1   2  1310885.39  745.93
   1   2 -13 9120.00  567.70
  -2  -1 -1212046.80  779.26
   2  -1  1212187.70  815.92
   2   1  1211498.25  763.12
  -1  -6   7 3992.94  442.47
  -1   6   7 3444.35  411.65
   1  -6  -7 3940.77  425.31
   5  -4 -10 4288.83  435.72
  -5  -4  10 3887.44  383.84
  -5  -4  10 4745.15  469.52
  -5   4  10 3571.76  430.06
  -5  -4  10 4360.54  531.31
   4   6  -5 8769.66  556.34
  -4   6   5 8069.85  504.15
  -4   6   5 8571.22  599.30
   4  -6  -5 8276.12  582.55
  -4  -6   5 8823.45  617.30
  -4  -6   5 8540.21  527.54
  -3   6  -4 2677.24  382.05
   3   6   4 3247.50  387.34
  -3  -6  -4 1923.51  289.07
  -3   6  -4 2764.66  451.94
  -2   5  -8 5250.94  514.61
   2  -5   8 5236.66  510.19
  -2  -5  -8 4946.21  562.06
   2   5   8 5504.93  599.09
   7   3  -9 1961.86  277.30
  -7  -3   9 1395.62  308.19
  -7   3   9 1908.12  336.20
   3   5   7 3404.39  636.19
  -3  -5  -7 3721.51  419.71
  -3   5  -7 3460.12  351.32
   3  -5   7 3571.92  408.31
  -7   1  11 1876.06  289.68
   7  -1 -11 1916.41  253.34
  -7  -1  11 2311.26  417.99
   7  -4   1 9703.18  755.47
   7   4   1 9660.81  678.37
  -7   4  -1 8547.36  547.83
  -7  -4  -1 9528.01  677.38
   0   3  12 1224.63  488.53
   0   3 -12 1221.50  191.18
   0  -3 -12  934.58  186.89
   0  -3  12  951.97  155.94
  -3  -3 -10 1108.21  382.98
   3   3  10 1568.80  271.01
   3  -3  10 1163.15  196.91
   9  -1  -4 6147.62  469.61
   9   1  -4 5529.64  605.18
  -9   1   4 5350.45  531.48
  -9  -1   4 8397.15  532.71
   0   7   0    4.78   44.16
   0  -7   0  -21.75  100.82
  -4   6  -214402.53  903.72
  -4  -6  -218207.53 1137.77
   4   6   216890.44 1078.98
   9   1  -313429.55 1034.68
   9  -1  -314570.39  994.93
  -9  -1   311685.98  727.90
  -9   1   314394.42  853.65
   2  -6  -7 3132.14  355.35
  -2   6   7 3392.03  420.59
  -2  -6   7 2991.27  390.40
  -5   1  -9 4269.37  457.73
   5  -1   9 3668.68  415.48
  -5  -1  -9 4111.49  454.65
   5   1   9 4503.87  554.41
   8  -3  -6 9163.79  637.82
   8   3  -6 7938.25  631.85
  -8  -3   6 9207.16  657.73
  -8  -2  -2  582.49  145.54
   8   2   2  745.46  215.08
   8  -2   2  611.28  301.14
  -8   2  -2  811.03  266.64
   0   7  -110730.09  721.72
   0  -7  -110663.57  699.01
   0   7   111197.00  750.94
   0  -7   110520.95  687.88
  -8   1  -3 5920.54  600.27
   8   1   3 4555.33  522.55
  -8  -1  -3 5988.19 1003.24
   8  -1   3 6254.65  470.25
  -6  -5  -1 4876.54  656.44
   6   5   1 4603.74  543.78
   6  -5   1 5397.37  613.77
   4   3   9 8366.16  596.67
  -4  -3  -910650.08  734.46
   4  -3   910728.47  686.16
  -9  -1   515378.50  935.17
   9   1  -517561.03 1112.53
   9  -1  -515565.32  996.57
   9  -1  -514896.66  866.30
  -9   1   512009.04  705.88
   6  -4  -9 2810.71  370.38
   6   4  -9 2176.23  368.37
  -6  -4   9 2770.63  379.13
  -6  -4   9 2862.08  411.68
  -6   4   9 2770.86  659.76
   0   4  11 2153.87  360.32
   0  -4  11 2721.97  371.14
   0   4 -11 2191.21  293.68
   0  -4 -11 2608.27  489.03
  -5   1  13 3621.55  504.51
  -5  -1  13 3117.74  492.88
   6  -2   7 5088.59  532.28
   6   2   7 4974.55  550.43
  -6  -2  -7 4931.85  524.19
  -6   2  -7 4493.65  517.31
   0  -6   7  879.89  225.91
   0   6   7  713.88  215.55
   0  -6  -7  833.05  193.93
  -9  -1   2 5131.18  534.24
   9   1  -2 4301.50  479.79
   9  -1  -2 5032.59  644.04
  -9   1   2 4275.24  414.25
   8   3   011030.11  755.20
  -8  -3   011634.44  775.29
  -8   3   011314.30  700.93
  -8   3   011399.80  690.46
   9   0  -6  436.95  379.39
   9   0  -6  485.15   96.03
  -9   0   6  535.33  111.13
   1  -7   027143.76 1636.40
  -1  -7   028739.91 5485.72
  -1   7   028481.45 5429.23
   1   7   025860.16 1538.96
   7   2   511988.91  820.70
   7  -2   511855.17 1059.64
  -7   2  -511897.41  751.56
  -7  -2  -511325.12  875.46
   5   5   414091.78  941.45
   5  -5   412764.20  807.11
  -5  -5  -412514.25  818.99
  -6  -3  -6 1844.12  293.59
   6   3   6 2281.68  388.92
   6  -3   6 1784.21  284.89
  -4  -2  13 4767.92  468.92
   4  -2 -13 4443.67  463.38
  -4  -2  13 4146.75  454.18
  -4   2  13 5395.22  565.66
  -1   7   1 1817.20  431.62
  -1  -7   1 1725.94  285.86
   1   7  -1 2162.28  311.29
   1  -7  -1 1786.11  272.80
   9   0  -1   89.88  140.82
  -9   0   1  129.20   96.47
  -4   5   9 4500.90  488.77
   4  -5  -9 3882.18  546.45
  -4  -5   9 3979.27  572.15
  -4   5   9 4788.79  463.06
   2  -3  11 4908.77  518.66
   2   3  11 5090.77  552.51
  -2  -3 -11 5175.98  541.09
  -5  -5   8 6255.28  587.80
  -5   5   8 6632.34  683.01
   5   5  -8 7527.77  469.00
  -5   5   8 7662.31  470.46
   5  -5  -8 8032.44  498.54
  -5  -5   8 7115.39 1447.30
  -6  -5   6 4642.15  479.06
  -6  -5   6 5020.01  554.21
  -6   5   6 5024.13  474.79
  -6   5   6 4350.63  497.82
   6  -5  -6 4468.38  417.27
   6   5  -6 4936.68  529.05
   7   4  -7 2229.42  367.48
  -7   4   7 1648.02  375.08
  -7  -4   7 2948.65  412.22
  -3   4  -9 6862.38  687.78
   3  -4   9 6288.79  611.45
  -3  -4  -9 6588.31  804.40
   3   4   9 5780.40  615.11
   1   5   9 2782.14  433.30
   1  -5   9 2805.10  375.29
  -1   5  -9 2734.42  355.59
  -1  -5  -9 2769.99  418.86
   0  -7   2 1287.55  312.47
   0   7   2 1124.92  219.21
   0   7  -2 1488.12  254.06
   0   7  -2 1781.05  257.51
   0  -7  -2 1352.78  307.07
  -4   4  11 6888.17  786.93
   4  -4 -11 5131.59  533.57
  -4  -4  11 5290.45  490.81
  -4  -4  11 5584.94  517.55
   1  -7   1  468.43  183.30
  -1  -7  -1  397.23  133.10
   1   7   1  455.35  425.16
  -1   7  -1  569.18  167.18
   7   0   6 5585.47  584.50
  -7   0  -6 6070.16  614.66
  -1  -7   220589.20 1270.58
  -1   7   220857.14 1357.83
  -1  -7   219817.76 1202.75
   1  -7  -220952.60 1272.64
   1   7  -218822.62 1168.39
  -1   0 -13 6269.73  641.96
   1   0  13 6584.35  667.72
   4   5   6 7266.81  577.81
   4  -5   6 6894.76  702.89
  -4  -5  -6 7481.15  571.45
   3  -2  11 3922.48  544.40
  -3  -2 -11 3965.27  552.57
   3   2  11 3088.33  455.93
  -4  -2 -10 3869.78  538.66
   4   2  10 2828.35  429.05
   4  -2  10 3399.90  485.57
  -2  -4 -10 5418.95  586.74
  -2   4 -10 6337.39  608.23
   2   4  10 5970.40  635.07
   2  -4  10 5255.87  524.09
   9  -1  -6 3664.56  467.46
   9   1  -6 2838.07  438.30
  -9  -1   6 3432.22  478.95
   9  -1  -6 3238.35  472.63
  -9   1   6 3601.33  457.87
   7   3   4  247.63  313.46
   7  -3   4   88.39  160.34
  -7   3  -4  186.43  118.74
  -7  -3  -4   82.84   97.64
  -9   1   1 9064.79  576.23
   9  -1  -1 7808.34  608.52
  -9  -1   1 8239.63  552.22
   9   1  -1 9029.17  636.44
  -3  -6   7 3844.22  539.25
   3  -6  -7 4585.38  473.82
  -3   6   7 3490.88  496.52
  -2   0  14 1411.30  299.78
   5   6  -2 1144.47  216.23
  -5   6   2 1081.70  189.96
  -5   6   2 1138.84  241.68
  -5  -6   2 1291.01  259.76
   5  -6  -2  962.83  185.44
   0  -2  13 5054.61  506.15
   0   2  13 6765.57  735.82
   0  -2 -13 5477.87  575.41
   4   4   8 3269.76  496.44
  -4  -4  -8 4274.68  469.45
   4  -4   8 4075.96  810.94
  -3   0  14  410.99  232.77
  -4  -6   6 8947.35  545.70
  -4  -6   6 9835.47  657.32
   4  -6  -6 9091.51  657.66
  -4   6   610174.09  875.82
   4   6  -610381.50  619.45
   2  -5 -10 3111.29  431.87
  -2   5  10 3395.16  501.39
   8   0 -10  172.17  258.39
  -8  -3   7  973.78  201.28
   8  -3  -7  811.60  327.13
   8   3  -7 1211.09  256.74
  -6  -3  11  744.79  224.98
  -6  -3  11  731.72  189.36
   6  -3 -11  726.83  133.95
  -6   3  11  673.96  216.01
  -6  -3  11 1080.92  406.53
   6   0   8 9857.26  724.01
  -6   0  -810197.49  674.72
   5  -6  -1   70.63  113.22
  -5   6   1   90.60   87.68
   5   6  -1   50.94   59.46
  -5  -6   1  106.02  199.02
  -6  -2  1214251.72  878.81
  -6   2  1214038.69  919.86
   6  -2 -1211927.44  754.91
   6  -2 -1213327.78  818.27
  -5  -6   3  504.50  204.86
  -5   6   3  295.90   89.42
   5   6  -3  444.95  264.59
   5  -6  -3  506.26  114.54
  -5   6   3  381.14  317.06
  -2   6  -6 9537.22  603.42
  -2   6  -6 9881.22  622.02
   2   6   610356.25  712.37
  -2  -6  -610995.00  723.28
   1  -7   214727.33  937.26
  -1  -7  -215388.51 1001.72
  -1   7  -214843.03  908.30
  -1   7  -214029.34  890.37
   1   7   215425.74 1047.43
   1  -5 -10 5343.05  557.73
  -1   5  10 5071.23  559.46
   7  -1   6 8897.47  702.12
  -7   1  -6 8704.26  595.61
  -7  -1  -6 9162.83  621.57
   7   1   6 8505.61  637.76
   7   4   2 3560.18  597.04
   7  -4   2 3807.20  558.63
  -7  -4  -2 3377.44  476.87
  -4  -6  -3  482.18  237.94
   4   6   3  411.19  370.16
   4  -6   3  396.36  140.07
   9   0  -7 8966.90  559.25
   9   0  -7 9238.38  659.43
  -9   0   7 9180.13  563.18
  -5  -3  -8 1627.75  434.03
   5   3   8 1690.64  439.93
   5  -3   8 1915.80  309.53
  -1  -1 -13 6067.20  621.64
   1  -1  13 6029.36  610.61
   1   1  13 6779.12  704.63
   2  -7  -1 6680.67  701.60
  -2  -7   1 6832.10  692.07
  -2   7   1 7102.79 1382.50
   2   7  -1 6598.87  644.80
  -8  -2   9 1562.94  398.04
   8   2  -9 1718.93  355.99
   9   0   0  386.92  310.85
  -9   0   0  352.86  259.45
  -1  -7   3 1273.22  271.52
   1   7  -3 1729.98  276.60
   1  -7  -3 1376.11  389.60
  -1   7   3 1582.31  365.02
   1   7  -3 1563.95  332.36
   0   7  -3 4770.50  469.89
   0   7  -3 4964.70  503.47
   0   7   3 3263.52  731.10
   0  -7  -3 5196.52  539.87
   0  -7   3 4874.03  669.65
   2  -7   0  511.55  218.68
   2   7   0  779.66  198.10
  -2   7   0  862.02  184.70
  -2  -7   0  463.34  418.53
   6   5   2 1163.81  423.69
  -6  -5  -2  921.68  209.70
   6  -5   2  817.46  204.45
  -8  -3  -112105.84  815.31
   8   3   110955.46  752.59
  -8   3  -112074.96  775.39
   8  -3   112387.94  813.22
   2  -2  12 3051.85  439.70
  -2  -2 -12 2794.62  418.75
   2   2  12 2918.51  443.49
  -5   3  1219750.79 1265.75
  -5  -3  1220705.80 1240.76
   5  -3 -1217585.27 1055.59
  -5  -3  1216888.85 1037.42
  -1   6  -7   12.74   19.83
   1   6   7  -52.16  117.29
  -1   6  -7    5.80   16.66
  -1  -6  -7  179.78  211.71
  -2  -7   2  991.77  223.14
  -2  -7   2 1067.68  203.20
   2  -7  -2 1212.41  228.21
  -2   7   2 1342.43  352.75
   2   7  -2 1201.77  302.10
  -2  -1  14 6491.57  654.83
  -2   1  14 6544.25  664.21
   2  -1 -14 5738.34  645.86
  -5   6   0   57.72   69.36
   5   6   0  105.70   90.70
  -5  -6   0  153.20  176.29
  -7   2  11 3332.88  516.37
   7  -2 -11 3463.99  463.71
   7  -2 -11 2703.51  368.96
  -7  -2  11 3818.55  515.85
  -3   5  10 4344.30  520.15
  -3  -5  10 3961.78  702.26
   3  -5 -10 3912.44  528.61
   3  -1 -14 3519.57  529.13
  -3   1  14 3638.95  626.39
  -3  -1  14 3513.90  486.40
  -3  -6  -5  253.31  211.89
  -3   6  -5  146.93  138.12
   3   6   5  298.96  289.17
   8  -1 -10 6704.97  620.79
   8   1 -10 6600.37  670.60
  -1   0  14 6723.30  689.01
   5  -6  -4 3442.28  452.93
  -5  -6   4 3271.87  496.66
   5   6  -4 2717.53  436.83
  -5  -6   4 3749.00  551.54
  -5   6   4 3487.01  493.04
  -5   6   4 3005.69  410.28
   9  -2  -410996.99  876.27
   9   2  -411941.54  801.05
  -9  -2   411375.27  790.49
  -9   2   4 9340.32  534.33
  -9   2   3 3543.48  458.90
  -9  -2   3 5225.18  537.83
   9   2  -3 3915.80  634.03
   9  -2  -3 5542.79  586.32
   8   0   417851.65 1167.04
  -8   0  -419040.72 1171.48
   6   1   8 6579.75  898.98
   6  -1   8 6641.05  676.36
  -6  -1  -8 6542.06  666.35
  -6   1  -8 6917.34  690.75
  -5  -2  -9 4752.17  523.17
  -5   2  -9 4609.36  487.20
   5  -2   9 4569.60  485.45
   5   2   9 4428.52  494.69
  -1   3 -12 8111.80  535.30
  -1  -3 -12 8297.61  596.31
   1   3  12 8149.74  648.05
   1  -3  12 7778.57  532.76
  -2  -7  -1 9447.46  643.96
   2   7   1 7058.14  729.34
  -2   7  -1 8106.13  570.70
   2  -7   1 9125.58  608.69
  -9  -1   713491.42  833.01
   9  -1  -714486.24  955.14
   9   1  -714333.23  942.30
   9  -1  -714131.23  813.71
  -6  -5   7 3239.36  457.79
  -6   5   7 3598.72  464.60
  -6   5   7 2918.55  462.55
   6   5  -7 3456.35  472.86
   6  -5  -7 3805.79  486.69
  -6  -5   7 3821.34  543.58
  -4   0  14 1287.36  277.86
   6  -4   5 2456.40  377.71
   6   4   5 2294.29  365.26
  -6  -4  -5 2700.21  392.73
   8   2   3 5633.67  649.72
  -8  -2  -3 4545.45  483.52
  -8   2  -3 5473.33  536.31
   8  -2   3 4755.37  513.74
  -9   1   0 2470.55  347.28
  -9  -1   0 2948.47  405.60
   9   1   0 2173.40  493.52
   9  -1   0 3147.09  480.01
  -9  -2   5 1607.96  385.01
   9  -2  -5 1442.19  343.89
   9   2  -5  886.39  195.94
  -5  -2  13 6702.80  650.80
  -5   2  13 4456.98  476.29
   5  -2 -13 5123.47  556.45
   7  -3 -1014187.15  815.90
   7  -3 -1011383.31  661.51
  -7   3  1012782.15  965.17
  -7  -3  1015928.49 1001.49
   7   3 -1013792.05  875.05
  -1   4 -11 6644.95  639.97
   1  -4  11 6703.23  644.86
  -1  -4 -11 6705.98  695.06
   1   4  11 7144.44 1406.97
  -9   2   211119.69  662.63
   9  -2  -2 9565.36  853.22
   9   2  -211499.75  795.79
  -9  -2   2 9881.11  664.61
   1  -6  -8 5372.50  574.23
  -1   6   8 4877.32  535.62
  -1  -6   8 5289.08  558.20
  -7   4   8 4608.31  573.94
  -7  -4   8 4462.23  483.14
   7   4  -8 5339.68  579.03
  -6   0  13  510.85  141.23
   0   5  10 8404.29  620.20
   0  -5 -10 8008.95  567.56
  -7   0  12  148.55  140.03
  -2  -7   3 5039.95  509.31
  -2  -7   3 5131.50  531.14
   2  -7  -3 5086.76  617.34
   2   7  -3 5153.09  497.63
  -2   7   3 5155.57  542.25
  -2   3  13  935.70  457.56
   2  -3 -13  524.85  166.66
  -2  -3  13  475.35  122.45
   1  -7   3 1017.48  213.68
   1   7   3  153.83  215.09
  -1  -7  -3  995.59  315.35
  -1   7  -3 1141.08  199.73
  -1   7  -3 1195.56  223.90
   2  -6  -8 8965.40  582.77
  -2   6   8 9836.45  690.63
  -2  -6   8 8618.19  591.76
  -1  -1  14 2343.92  356.34
  -1   1  14 2069.81  334.76
   1  -1 -14 1916.56  302.81
  -8   1  -4 2221.32  327.71
   8   1   4 2356.84  371.93
   8  -1   4 2135.02  365.12
  -8  -1  -4 2058.55  347.70
  -5  -4  -7 7797.58  576.57
   5  -4   7 7419.67  573.93
   5   4   7 8291.01  601.59
  -3  -3  13 3868.98  514.67
  -3  -3  13 4597.60  462.30
  -3   3  13 4577.88  508.58
   3  -3 -13 4137.29  437.51
   1  -7  -416805.17 1053.80
   1   7  -414683.30  862.90
  -1   7   415805.37 1023.32
   1   7  -415351.12  918.65
  -1  -7   415908.57  999.41
  -5  -6  -1   56.14   94.84
   5   6   1  126.74  103.13
  -2  -4  12 6429.00  586.16
  -2  -4  12 5831.31  532.92
   2  -4 -12 5664.79  579.46
  -2   4  12 6203.87  656.66
   5  -5   5  465.55  288.16
  -5  -5  -5  573.30  361.53
   5   5   5  666.88  201.49
  -4   0 -11   12.09   95.82
   4   0  11  -12.24  133.70
   4  -1 -14 1158.72  286.04
  -4  -1  14 1244.57  255.15
  -4   1  14 1084.07  233.08
   5  -6  -5 1583.32  319.91
  -5  -6   5 1017.19  222.25
  -5  -6   5 1115.18  202.19
   5   6  -5 1125.75  218.56
  -5   6   5  831.58  275.91
  -5   6   5  863.97  160.87
  -8  -3   8 7740.72  544.12
   8   3  -8 7078.77 1372.70
   5  -4 -11 3177.86  455.04
  -5  -4  11 2736.40  372.88
  -5   4  11 2769.16  428.61
  -5  -4  11 3291.98  430.80
  -5  -4  11 3155.67  461.67
   0   7   4 5030.54  555.11
   0   7  -4 4779.18  469.68
   0  -7   4 3860.79  654.43
   0  -7  -4 4303.59  450.40
   0   7  -4 4704.95  457.05
   9   0  -8  238.62   92.15
   9   0  -8  229.41  202.84
  -9   0   8  222.23  111.35
   3   0  1225152.25 1636.45
  -3   0 -1227527.93 1685.03
  -6   4  1012632.66  840.71
  -6  -4  1011550.58  702.02
   6  -4 -1012717.90  776.40
  -6  -4  1012693.90 1085.79
   2  -7   2  689.08  201.23
   2   7   2 1122.11  239.35
  -2   7  -2 1244.68  220.16
  -2  -7  -2  786.09  287.68
  -5   5   9 5737.24  543.99
  -5  -5   9 5165.74  485.40
  -5   5   9 5781.55  603.77
  -5  -5   9 6383.60  659.40
   5  -5  -9 6154.88  601.89
   9   2  -6 6712.57  686.59
   9  -2  -6 5835.02  837.53
  -9  -2   6 7402.00  521.35
   9   0   1  124.05  139.02
  -9   0  -1   89.95   63.07
  -4   6   7 7346.87  555.95
  -4  -6   7 7932.15  463.80
  -4  -6   7 8029.93  594.53
   4   6  -7 6998.83  638.74
   4  -6  -7 8130.45  517.57
  -1  -3  13 5849.22  579.16
  -1   3  13 5630.75  623.13
   1   3 -13 4942.05  483.36
   1  -3 -13 6256.46  645.34
  -3   5  -8 8764.16  566.64
  -3  -5  -8 8608.11  604.46
   3   5   8 8816.01  625.34
   3  -5   8 8463.85  564.34
   9  -2  -1 4638.69  644.05
  -9   2   1 5703.34  550.85
  -9  -2   1 5806.47  677.65
   9   2  -1 5852.07  685.03
  -6  -1  13 5483.48  590.92
  -6   1  13 6428.51  739.00
  -7  -1  12 1122.66  215.30
   7  -1 -12 1193.45  213.54
  -7   1  12 1252.75  456.04
   0  -6   8 6729.49  683.60
   0  -6  -8 6275.56  622.18
   0   6   8 6800.86  771.23
  -3  -4  12 3481.27  440.53
  -3  -4  12 3886.97  490.91
   3  -4 -12 3415.63  475.44
  -3   4  12 3785.71  570.93
   8   4  -3 5543.66  583.86
  -8   4   3 6273.37  566.18
   8  -4  -3 5688.15  598.93
  -8  -4   3 7243.60  500.84
   2  -5   9 2422.35  346.94
  -2   5  -9 2998.85  397.38
  -2  -5  -9 2646.06  391.57
   2   5   9 2977.68  462.19
  -1  -4  12 4437.28  429.51
   1  -4 -12 4323.29  552.63
  -1   4  12 4347.35  495.23
   7  -5  -3 9260.19  646.77
  -7   5   3 8998.63  535.18
  -7  -5   3 9782.09  657.51
   7   5  -3 8477.36  569.32
   4   6   412707.72  859.97
   4  -6   415788.75  972.60
  -4  -6  -415103.37  991.71
   8   4  -4 1378.62  334.22
  -8  -4   4 2352.43  357.87
   8  -4  -4 2180.38  394.40
   7  -5  -2 9966.04  746.44
  -7  -5   2 7934.16  564.71
   7   5  -2 8060.75  577.52
  -7   5   2 6957.32  650.84
   7  -4   314972.40  964.88
  -7  -4  -313848.15  924.30
   7   4   314432.47  977.10
   4  -5 -10 1816.67  273.07
  -4  -5  10 1683.31  370.22
  -4   5  10 2493.69  402.76
  -8  -3  -2 8182.51  583.91
   8   3   2 8061.75  612.11
   8  -3   2 7555.24  599.31
  -8   3  -2 8410.19  533.82
   7   2   6 5502.54  590.56
   7  -2   6 4547.52  494.01
  -7   2  -6 5706.78  594.06
  -7  -2  -6 5161.95  539.04
  -3   6   8 4264.05  488.73
  -3  -6   8 3780.65  594.47
   3  -6  -8 3962.24  540.50
  -2  -7   4  642.37  122.13
  -2   7   4  973.33  280.38
   2  -7  -4  756.22  171.56
  -2  -7   4  694.13  380.98
   2   7  -4  670.07  167.92
  -8   4   2 1255.18  204.76
  -8  -4   2 1212.40  331.30
  -8   4   2 1581.96  309.26
   8  -4  -2 1207.69  529.19
   8   4  -2 1626.13  366.67
   6   5   3 4248.17  468.38
  -6  -5  -3 4729.97  519.75
   6  -5   3 4326.20  476.01
  -4  -1 -11 1317.89  313.14
   4  -1  11 1164.11  245.88
  -4   1 -11 1769.10  299.89
   4   1  11 1279.94  276.34
   1  -2  13 6798.94  736.27
  -1  -2 -13 7073.24 1387.29
   1   2  13 7329.67  550.21
   3   7  -1 3582.34  567.53
   3  -7  -1 3134.88  442.15
  -3   7   1 3716.29  517.72
  -3  -7   1 2854.62  484.68
   0   0 -14  141.27  165.73
   0   0  14   86.58  162.57
   7   5  -4 6210.40  652.93
  -7  -5   4 5853.82  603.78
  -7   5   4 6848.49  624.42
   9  -1  -8 1240.31  273.74
   9  -1  -8 1193.38  189.71
  -9  -1   8 1282.48  233.87
   9   1  -8 1205.72  331.32
  -3  -1 -12 2976.98  469.97
  -3   1 -12 3336.76  493.17
   3  -1  12 3155.43  483.02
   3   1  12 4249.39  464.97
  -5   0 -1014364.63  933.72
   5   0  1014441.66  974.52
  -3   7   2 8088.80  566.85
  -3  -7   2 8854.27  617.68
   3  -7  -2 8179.57  629.42
   3   7  -2 9034.93  600.80
   6   3   712437.85  841.52
  -6  -3  -711595.45  777.03
   6  -3   711354.19  786.38
   9  -1   1 7188.34 1413.20
   9   1   1 8677.90  615.81
  -9  -1  -1 8228.29  540.56
  -9   1  -1 8141.86  580.75
  -7  -3  -5 1328.98  264.18
   7   3   5 1208.90  291.79
  -7   3  -5 1259.21  250.87
   7  -3   5 1260.08  266.86
  -4  -3  13  184.51  127.59
  -4   3  13  246.89  265.04
  -4  -3  13  287.42  187.54
   4  -3 -13  289.10  236.80
  -3   7   011418.65  737.81
   3   7   010722.69  824.81
   3  -7   0 9876.01  758.26
  -3  -7   010557.15  859.01
   2  -2 -14 6663.47  659.05
  -2  -2  14 7665.47  530.13
   8  -4  -5 2456.33  387.52
   8   4  -5 3020.52  452.02
  -8  -4   5 3106.01  523.42
   4  -5   7 4195.40  471.19
   4   5   7 3859.70  551.99
  -4  -5  -7 4106.75  819.58
   7  -5  -110901.81  757.58
  -7  -5   110510.25  732.65
  -7   5   111857.17  727.83
   7   5  -110818.12  799.38
  -3  -2  14 1758.77  292.40
  -3   2  14 1707.20  299.99
   3  -2 -14 1590.74  388.83
  -8   2  10 6257.51  644.59
   8   2 -10 7197.48 1400.40
  -8  -2  10 7270.25  507.43
   8  -2 -10 7548.82  435.06
   1  -7   4 9701.29  896.04
  -1   7  -4 8994.86  570.02
   1   7   4 9340.52  769.99
  -1   7  -4 9093.60  567.03
  -1  -7  -4 8738.20  806.26
  -5   0  14   77.07   83.29
  -8   0  11 5000.89  530.88
   8   0 -11 3716.99  496.50
  -6  -2  -8 2434.42  368.86
   6  -2   8 2559.33  387.27
  -6   2  -8 2691.08  635.08
   6   2   8 2515.45  409.52
   2   0  13 2570.88  381.34
  -2   0 -13 3065.17  466.00
   6   5  -8 2038.30  290.04
  -6   5   8 2205.52  390.02
  -6  -5   8 2535.76  378.73
   6  -5  -8 2399.51  337.15
  -6  -5   8 1965.06  269.55
   8  -4  -1 5271.06  559.25
  -8  -4   1 4838.00  498.58
  -8   4   1 3621.90  473.42
   8   4  -1 4131.38  493.22
  -8   4   1 4634.94  450.77
   5  -6   2  435.38  387.94
   5   6   2  544.67  321.39
  -5  -6  -2  375.42  359.10
  -2   6  -7  577.54  126.30
   2   6   7  589.42  615.61
  -2   6  -7  591.15  138.46
  -2  -6  -7  764.24  421.59
  -3  -7   3 2711.70  382.06
  -3   7   3 2946.29  587.54
  -3  -7   3 2762.25  499.24
   3  -7  -3 2659.58  389.25
   3   7  -3 2971.13  413.02
   9   2  -7 2226.54  335.89
   9  -2  -7 1670.51  410.51
  -9  -2   7 1802.52  298.68
   5   6  -6 2271.05  313.03
   5  -6  -6 1763.23  276.53
  -5   6   6 2080.33  351.40
  -5  -6   6 1696.36  306.73
  -5   6   6 2126.93  317.44
  -5  -6   6 1759.69  253.70
  -2   7  -3 2806.77  432.48
  -2  -7  -3 3286.52  466.92
   2  -7   3 3316.79  460.42
   2   7   3 2703.08  399.60
  -2   7  -3 2511.21  354.13
   0  -1 -14 4668.38  584.34
   0  -1  14 5247.15  575.50
   0   1  14 5682.10  607.15
  -7   0  -7  396.33  298.83
   7   0   7  348.03  327.53
  -9  -2   0 8434.56  574.12
   9  -2   0 8644.49  610.70
  -9   2   010360.70  644.40
   9   2   0 9703.20  799.43
   7   5  -5 8265.35  686.39
  -7   5   5 8689.14  620.05
  -7  -5   5 7374.31  677.41
  -7   5   5 9657.96  551.17
  -3  -3 -1110239.27  695.16
   3  -3  1110003.69  680.01
   3   3  11 9705.28  926.16
   5  -1  10 5324.15  691.97
  -5  -1 -10 6182.38  629.12
  -5   1 -10 5811.02  625.15
   5   1  10 6097.74  657.56
  -1   7   5  897.93  232.39
   1  -7  -5  628.47  176.44
  -1  -7   5  526.34  203.18
   1   7  -5  879.18  149.35
   1   7  -5  936.68  164.79
  -1  -5 -10 5636.03  576.31
  -1   5 -10 5854.29  548.54
   1  -5  10 5964.69  554.09
   4  -3  10  732.13  177.46
  -4  -3 -10  726.30  185.72
   4   3  10  406.49  548.25
  -3  -6  -6 4586.62  490.73
  -3   6  -6 4928.43  493.68
   3  -6   6 4694.99  474.65
   3   6   6 4740.80  812.23
  -4  -4  1211669.64  683.06
  -4   4  1212242.94  834.22
   4  -4 -1211472.17  809.83
  -4  -4  1212727.03  747.25
   3   7   1 1194.03  252.07
   3  -7   1 1220.91  238.29
  -3   7  -1 1210.04  231.06
  -3  -7  -1 1297.83  485.08
   7   4  -9 4377.02  444.45
  -7   4   9 3781.89  543.27
  -7  -4   9 4353.31  456.92
   0   3 -13 2959.15  422.33
   0  -3 -13 2750.58  505.28
   0  -3  13 2754.03  376.16
   0   3  13 3452.13  563.31
   0   4 -12 5767.87  539.64
   0  -4 -12 6167.91  630.53
   0   4  12 5501.28  853.00
   0  -4  12 6420.29  601.38
   1  -2 -14 3149.61  446.98
  -1   2  14 3815.76  576.80
  -1  -2  14 3803.78  565.93
   0  -7  -5 3796.38  525.98
   0   7  -5 4438.96  428.93
   0  -7   5 3617.96  569.93
   0   7   5 3996.38  782.99
   0   7  -5 4241.85  425.67
  -5  -1  14 5197.67  555.90
  -5   1  14 5515.06  744.22
  -3  -4 -10 1006.68  285.62
   3   4  10 2157.58  375.46
   3  -4  10 1206.62  283.08
  -8   1  11 6849.15  705.26
   8   1 -1110759.84  716.56
   8  -1 -1110287.12  614.85
   8  -2   4 1801.06  308.01
  -8   2  -4 1949.01  432.39
   8   2   4 1735.92  319.86
  -8  -2  -4 1864.99  393.00
   2   1  13 5474.08  578.60
  -2   1 -13 6364.44  660.94
  -2  -1 -13 5377.86  590.89
   2  -1  13 5171.77  537.35
  -6  -3  1210691.79  673.57
  -6   3  1211884.21  831.87
  -6  -3  1210789.20  682.35
   6  -3 -1210857.44  671.59
   7  -5   0 7866.45  609.17
   7   5   0 8208.53  590.27
  -7  -5   0 7174.43 1396.05
  -7   5   0 6805.04  654.10
  -1   6  -8 7027.74  643.13
  -1   6  -8 6123.34  562.08
   1   6   8 5574.29  793.85
  -1  -6  -8 7905.85  621.74
   8  -4  -6 1840.81  319.17
   8   4  -6 2742.67  390.58
  -8  -4   6 2553.12  401.37
   9   0  -911641.25  693.80
   9   0  -9 9533.06  686.39
  -8   0  -5 3770.57  523.89
   8   0   5 3129.89  473.19
  -2  -7   5 2744.20  404.43
   2   7  -5 2884.53  382.04
   2  -7  -5 2928.91  417.69
  -2   7   5 2736.75  435.49
   2   7  -5 2851.43  387.79
   2  -5 -11 8124.99  540.49
  -2   5  11 6640.46  705.48
  -4   2  1411559.26  921.83
  -4  -2  1412832.04  809.17
   4  -2 -1411879.79  761.82
  -7   1  -7 1936.39  313.26
  -7  -1  -7 1867.51  301.41
   7   1   7 1830.87  354.12
   7  -1   7 1720.91  296.85
   8   3  -9  374.30  128.41
  -8   3   9  331.83  303.19
  -8  -3   9  281.81  259.32
  -9   0  -2   45.71   84.82
   9   0   2   37.03  147.56
   4   4   9 6268.64  673.22
  -4  -4  -9 5764.94  655.53
   4  -4   9 5357.83  586.44
  -3   7   4 9979.97  930.88
   3  -7  -4 9437.32  684.18
   3   7  -410642.41  662.80
  -3  -7   4 9716.14  676.30
  -3  -7   4 9755.58  612.93
  -8   4   0 1787.97  255.06
   8  -4   0 2602.27  400.25
   8   4   0 2033.61  327.65
  -8  -4   0 2845.63  408.16
  -8   4   0 1646.95  329.74
   6   4   6 2251.44  371.50
  -6  -4  -6 2728.85  407.94
   6  -4   6 2950.98  421.22
  -2  -3 -12   76.47   87.20
   2  -3  12   45.36  106.38
   2   3  12  248.22  177.99
   6  -2 -13  663.85  217.27
  -6  -2  13  860.30  267.15
  -6   2  13 1003.73  220.82
  -7  -2  12 4860.30  506.19
   7  -2 -12 5780.97  558.97
   7  -2 -12 5037.24  489.22
  -7   2  12 5654.59  581.77
   1  -5 -11 1393.40  298.40
  -1   5  11 1991.22  614.40
  -7  -3  11  389.77  120.00
   7  -3 -11  335.74  100.37
  -7   3  11  579.69  440.24
   7  -3 -11  396.34  113.63
   2  -4  11 7019.67  529.97
   2   4  11 9625.42  807.43
  -2   4 -11 8666.15  571.56
  -2  -4 -11 6831.80 1136.98
   7   5  -6 5340.67  554.54
  -7   5   6 5614.98  592.70
  -7  -5   6 6125.42  749.02
   4  -6  -8 4309.66  429.29
  -4   6   8 5286.79  553.83
  -4  -6   8 4257.81  446.26
   9   3  -4 1621.56  320.40
   9  -3  -4 1298.78  557.71
  -9  -3   4 1374.72  296.13
  -9   3   3  292.15   58.59
  -9  -3   3  425.88  196.40
   9  -3  -3  503.14  417.16
   9   3  -3  285.19  216.10
  -9   3   3  273.16   66.45
  -6   0  -9 1006.36  301.95
   6   0   9  814.61  243.97
   3  -5 -11 5036.86  512.19
  -3   5  11 6544.01  678.28
   2  -6  -9 3601.40  380.09
  -2   6   9 3287.26  384.14
  -2  -6   9 3594.11  440.78
  -5  -3  -9 7085.96  702.58
   5  -3   9 7105.74  532.61
   5   3   9 8012.34  765.55
   3   7   213204.53  909.54
  -3  -7  -211043.14  813.61
   3  -7   210694.13  716.40
  -3   7  -212293.92  826.22
  -1  -6   9 6678.93  669.74
  -1   6   9 5528.32  591.86
   1  -6  -9 6665.11  661.99
  -9  -1   9 6873.39 1117.82
   9   1  -9 6854.26 1275.43
   9  -1  -9 7333.77  578.13
   9  -1  -9 6650.59  586.05
   8  -1   5 5851.49  803.98
   8   1   5 5582.19  673.20
  -8  -1  -5 6050.72  735.59
  -8   1  -5 5603.36  560.12
   4  -2  11 8504.70  647.58
  -4  -2 -11 8819.43  677.16
   4   2  11 7066.52  539.41
  -8   3  -312354.10  860.72
  -8  -3  -311344.27  813.75
   8   3   312473.13  870.68
   8  -3   310899.98  759.02
  -6   6   210492.38  733.39
  -6  -6   210270.48  722.57
   6   6  -2 8979.78  745.73
  -5  -5  -6 8231.45  605.78
   5  -5   6 7691.93  533.14
   5   5   6 6388.78  648.05
  -6   6   3 8061.19  509.68
   6   6  -3 8201.52  557.05
  -6   6   3 8054.02  578.51
  -6  -6   3 8054.69  617.31
   9  -1   2 5034.52  536.88
   9   1   2 4748.76  509.11
  -9   1  -2 5672.78  548.02
  -9  -1  -2 5393.55  526.03
  -4  -6  -5 1052.73  263.67
   4   6   5  825.02  237.87
   4  -6   5 1149.24  250.33
   9  -2  -8 8258.95  858.19
   9   2  -8 8277.14  611.72
  -9  -2   8 9443.33  632.00
  -3  -2 -12 2338.17  330.62
   3  -2  12 2507.64  350.22
   3   2  12 1672.98  528.20
   6  -5   4 5081.08  638.66
  -6  -5  -4 4837.07  493.78
   6   5   4 5071.71  537.17
   9   3  -5   70.11  155.87
   9  -3  -5   67.14  150.00
  -9  -3   5   36.25   96.79
  -5   3  13 2768.29  386.07
  -5  -3  13 2677.09  351.64
   5  -3 -13 2466.21  406.52
  -5  -3  13 2593.61  321.57
   9   3  -2  154.64  122.56
  -9   3   2   95.33   63.34
  -9   3   2   98.18   91.07
   9  -3  -2   32.33  139.76
  -9  -3   2   48.40   54.36
  -5  -6  -3   -2.07  113.65
   5  -6   3   33.94   89.03
   5   6   3   33.73   67.26
  -7  -4  -4 3349.31  421.30
   7   4   4 2771.56  558.29
   7  -4   4 3022.33  492.90
  -9  -2  -1 7478.30  643.33
  -9   2  -1 8252.26  560.37
   9  -2   1 7563.51  569.67
   9   2   1 7779.18  752.23
  -1   7  -5  885.13  204.07
   1  -7   5  789.74  235.89
   1   7   5  739.40  282.86
  -1   7  -5  874.80  186.40
  -1  -7  -5  658.31  209.41
  -5  -5  10 3274.99  301.59
  -5   5  10 3765.87  414.96
   5  -5 -10 3213.33  530.85
  -5  -5  10 3325.70  504.33
  -5  -5  10 2792.73  321.12
   2  -7   4 1850.79  305.93
  -2   7  -4 2342.88  334.53
  -2  -7  -4 1794.46  359.92
   2   7   4 2132.34  392.61
  -2   7  -4 2218.38  263.67
  -6   6   1 8139.35  529.81
  -6  -6   1 7256.66  641.12
   6   6  -1 8372.56  615.45
  -6   6   1 7394.63  534.22
   5   6  -7 2060.25  287.68
  -5   6   7 2404.38  368.47
  -5   6   7 2189.79  271.61
  -5  -6   7 2392.08  287.29
   5  -6  -7 2833.04  339.86
  -5  -6   7 2578.44  350.70
   7  -5   1 8702.40  634.00
   7   5   1 8391.87  618.50
  -7  -5  -1 8866.45  624.27
  -8  -4   7 1721.53  248.36
  -8   4   7 2077.58  308.65
   8   4  -7 2242.77  293.95
  -6  -4  11 2447.91  402.12
  -6  -4  11 2578.74  307.07
  -6  -4  11 2602.10  307.82
  -6   4  11 2378.62  410.79
   6  -4 -11 2368.52  311.66
  -1   0 -14 7857.15  574.93
   1   0  14 8364.82  610.32
  -6   6   4 9061.32  666.30
  -6   6   4 7702.88  493.39
   6  -6  -4 8883.85  569.99
  -6  -6   4 8991.80  804.36
   6   6  -4 8398.94  619.47
   6  -1   9 2345.53  358.40
   6   1   9 2473.02  504.65
  -6  -1  -9 1860.90  370.23
  -6   1  -9 2392.25  318.88
  -7   0  1314717.40  966.74
  -3   6   9 9538.41  728.90
  -3  -6   9 6567.92  678.25
   3  -6  -9 6607.65  619.12
  -3   0  1518077.44 2936.71
   1  -7  -6 9368.09  700.16
  -1   7   6 7627.66  612.07
  -1  -7   610247.63  776.25
   5  -4   8 2675.24  364.01
   5   4   8 2573.77  374.39
  -5  -4  -8 2523.31  452.56
   0  -2 -14 4815.67  518.55
   0   2  14 4958.13  528.94
   0  -2  14 4989.37  561.22
  -3  -7   5 2248.91  410.79
   3  -7  -5 2530.76  324.24
  -3  -7   5 2583.94  301.12
   3   7  -5 1843.72  239.06
  -3   7   5 1930.43  414.15
  -2   0  15  413.39  354.23
   0  -6  -9 2955.10  378.15
   0   6   9 2646.97  516.51
   5  -2  10 1908.43  398.97
  -5   2 -10 1967.56  350.59
  -5  -2 -10 1942.09  363.43
   5   2  10 2082.81  345.84
   4  -7  -2 2058.84  294.63
  -4  -7   2 1983.14  499.06
  -4   7   2 2053.24  354.33
   4   7  -2 2301.66  307.78
  -6  -5   9 6096.09  615.11
  -6  -5   9 5824.99  525.65
  -6   5   9 7201.14  554.93
   6   5  -9 6921.21  499.71
   6  -5  -9 5396.92  483.46
   0  -5 -11 7175.21  547.34
   0   5  11 6408.21  919.28
  -4  -7   1 2784.00  403.67
   4   7  -1 2312.15  346.26
  -4   7   1 2396.65  311.75
   4  -7  -1 2711.52  339.10
  -9  -3   6 3222.90  686.74
   9  -3  -6 2662.98  541.93
   9   3  -6 2585.14  340.20
   8  -4   1 1147.34  318.93
  -8  -4  -1 1248.01  305.98
  -8   4  -1  911.55  189.73
  -8   4  -1 1152.05  245.29
   8   4   1 1097.56  337.96
  -9   3   1  123.83  118.95
   9   3  -1   66.75  109.92
   9  -3  -1   84.70  177.17
  -9   3   1  122.66   51.18
  -9  -3   1  214.16  201.15
   5  -4 -12 6776.40  627.91
  -5  -4  12 7423.54  477.37
  -5   4  12 5858.07  614.39
  -5  -4  12 7825.50  509.02
   6   6   012084.06  940.54
  -6  -6   012129.82  834.12
   6  -6   012387.15  863.78
  -6   0  14   -2.61   83.73
   2  -7  -6 2216.37  289.78
  -2   7   6 1906.30  474.60
  -2  -7   6 2176.51  309.58
  -5  -2  14  437.32  131.48
  -5   2  14  583.79  182.83
   5  -2 -14  284.00   99.00
   0  -7  -6 2329.15  327.99
   0  -7   6 2549.28  500.75
   0   7   6 2441.51  382.34
   0   7  -6 2484.43  280.75
   0   7  -6 2367.52  269.99
   8   2 -11  235.11  234.90
   8  -2 -11  481.94  141.99
  -8  -2  11  787.83  243.46
   8  -2 -11  529.30  121.46
  -8   2  11  254.80  162.64
  -7   5   7 5920.71  616.82
  -7  -5   7 4947.36  535.17
   7   5  -7 5820.40  572.69
   1   1  14  776.09  266.04
  -1  -1 -14  565.53  267.61
   1  -1  14  462.93  271.96
   4   7  -3 2342.12  289.99
  -4  -7   3 2626.45  356.22
  -4   7   3 2335.51  322.29
   4  -7  -3 2751.69  338.59
  -3   5  -9 7728.93  515.69
   3   5   9 8264.79  619.52
  -3  -5  -9 7446.47  555.52
   3  -5   9 7643.45  537.05
   2   2  1312542.45  882.75
  -2  -2 -1314254.81  973.48
   2  -2  1313990.65  911.02
  -4   5  1112235.49  855.07
  -4  -5  1111462.27  851.03
   4  -5 -11 9829.09  656.98
  -7   1  13  418.66  317.90
  -7  -1  13  927.57  324.72
   4  -7   0 1814.55  259.42
   4   7   0 1542.01  346.11
  -4  -7   0 1523.73  249.92
  -4   7   0 1637.49  248.20
  -3   7  -3  436.48  139.43
  -3  -7  -3  722.21  210.98
   3   7   3  385.40  345.18
   3  -7   3  752.18  195.24
  -1   4 -12 1047.94  218.61
   1   4  12 1163.70  325.44
  -1  -4 -12  730.50  238.94
   1  -4  12  735.37  192.87
 -10   0   4 2799.97  338.98
  10   0  -4 2045.66  252.06
  10   0  -4 2504.03  362.17
   7  -3   6  773.66  220.08
   7   3   6  918.34  300.78
  -7   3  -6  899.78  230.13
  -7  -3  -6  709.06  206.20
  -6   6   5 9735.96  609.17
   6   6  -5 9758.01  660.01
  -6  -6   510876.75  749.33
  -6   6   510517.48  735.51
   6  -6  -5 9971.48  640.45
   3  -1 -15  504.90  184.50
  -3  -1  15  495.95  157.36
  -3   1  15  786.38  468.10
   1  -3  13 7654.07  515.35
   1   3  13 8324.41  643.52
  -1  -3 -13 7788.82  560.60
  -7  -2  -7 6993.30  511.00
   7   2   7 8050.48  712.23
   7  -2   7 7520.72  593.44
  -7   2  -7 7059.46  498.30
   2  -1 -15 8419.09  700.69
  -2  -1  15 7998.58  568.08
  -2   1  15 7914.50  583.97
  10   0  -311002.08  985.81
 -10   0   311303.73  746.13
  -4   0  15 2899.66  381.01
  10   0  -518361.81 2915.33
 -10   0   519415.33 3084.12
  10   0  -510228.34  740.93
   9   0 -10  379.61  196.50
   9   0 -10  211.00  154.00
  -7   4  10 5080.58  607.02
   7  -4 -10 4253.84  371.40
  -7  -4  10 4083.67  492.60
   7  -4 -10 3058.23  333.23
   7   4 -10 5145.63  493.38
   2   5  10 2919.62  419.66
  -2  -5 -10 3353.07  374.49
  -2   5 -10 3155.59  363.38
   2  -5  10 3042.41  383.74
  -8   0  12  341.08  286.00
  -2  -4  13 4887.92  448.10
  -2   4  13 3679.62  683.30
   2  -4 -13 4531.88  463.29
  -2  -4  13 4519.33  401.09
   1   0 -15 9632.39  704.80
  -1   0  1510792.22  744.16
  -2  -6  -8 7913.08  754.69
   2   6   8 7649.46  622.23
   9   0   3 2505.24  361.53
  -9   0  -3 2344.74  432.11
  -2   3  14 1709.68  303.72
   2   3 -14 1806.24  222.48
   2  -3 -14 1806.06  261.16
  -2  -3  14 2194.03  269.23
  -4  -5  -8 3487.22  393.29
   4  -5   8 3228.88  557.58
   4   5   8 3792.60  462.44
   3   6   7   12.01  103.13
   3  -6   7   58.32   76.25
  -3  -6  -7   26.16   82.31
  -3   6  -7   66.31   80.07
  -6  -1  14  604.20  187.74
  -6   1  14  265.05  185.69
  -3  -3  1413155.69  839.66
  -3   3  1413548.02  987.67
  -3  -3  1411953.70  777.00
   3  -3 -1412486.96  815.22
  -8   3  10 5227.88  549.40
  -8  -3  10 4362.01  593.94
   8   3 -10 4969.58  541.05
  -6   3  -8  414.66  158.79
  -6  -3  -8  333.92  172.86
   6   3   8  389.06  356.10
   6  -3   8  255.08  264.76
   3  -4 -13 2699.95  371.04
  -3  -4  13 2440.12  276.11
  -3  -4  13 2694.03  300.18
  -3   4  13 2097.25  377.21
   4  -7  -4 2595.88  383.31
   4   7  -4 2958.48  360.25
  -4  -7   4 2607.32  478.97
  -4   7   4 2652.95  469.94
  -4  -7   4 2803.79  332.03
 -10   1   4 2121.13  253.69
 -10  -1   4 3980.71  419.51
  10   1  -4 2937.12  422.53
  10  -1  -4 3206.42  572.42
 -10   0   2 1130.47  246.88
  10   0  -2 1309.44  323.10
   9   2  -9 7575.37  555.41
  -9  -2   9 6063.16  657.90
   9  -2  -9 6971.76  541.40
   7  -5   2 9221.12  648.18
   7   5   2 9913.74  841.36
  -7  -5  -2 9415.35  674.52
   8   2   5 4788.91  543.08
   8  -2   5 4369.35  626.73
  -8  -2  -5 4699.29  493.36
  -8   2  -5 4923.31  504.18
   9  -3  -7  612.89  421.78
  -9  -3   7  507.82  133.34
   9   3  -7  680.50  194.28
   4  -7   1 2579.30  352.76
  -4  -7  -1 2677.76  362.81
   4   7   1 2181.11  310.89
  -4   7  -1 2008.88  440.42
 -10   0   6  262.87   95.01
  10   0  -6  166.38  254.03
  10   0  -6  199.60  142.49
   9   3   0  125.86  130.45
  -9   3   0  103.01   85.56
  -9  -3   0   78.66  116.13
   9  -3   0  100.23  184.45
 -10   1   3  892.12  207.14
  10  -1  -3  849.07  242.51
 -10  -1   3 1082.34  248.49
  10   1  -3  901.18  425.34
   8   4  -8 2735.28  363.70
  -8  -4   8 3442.56  387.47
  -8   4   8 1584.22  259.73
   9   2   2 7137.42  554.84
  -9  -2  -2 5545.71  556.11
  -9   2  -2 6200.98  622.89
   9  -2   2 6390.59  649.68
   6  -6   1 6657.70  705.72
  -6  -6  -1 6432.97  633.05
   6   6   1 8851.13  912.06
   4  -1 -1514418.31  936.03
  -4   1  1512613.25  861.33
  -4  -1  1513219.46  967.46
  10   1  -5 3349.48  406.66
  10  -1  -5 2717.27  470.38
 -10   1   5 3324.59  307.63
 -10  -1   5 3441.71  341.82
  -9  -1  10 2190.90  316.60
   9  -1 -10 2079.10  354.00
   9   1 -10 2171.47  397.44
   9  -1 -10 1978.73  232.86
   4   0  12 7124.72  577.42
  -4   0 -12 6912.77  527.56
  -8   1  12 1292.74  309.47
   8  -1 -12 1199.37  258.75
  -8  -1  12 1581.94  375.41
  -2   7  -5 2082.11  255.53
   2  -7   5 3023.26  403.08
  -2   7  -5 1872.72  267.36
   2   7   5 1954.09  294.31
  -2  -7  -5 2490.70  334.34
  -5  -6  -4 2273.52  328.74
   5  -6   4 2357.30  353.74
   5   6   4 2452.49  531.19
   1  -4 -13 3298.27  365.98
  -1  -4  13 3153.57  364.19
  -1   4  13 3039.74  472.18
   1   4 -13 3292.67  308.77
  -1  -1  15  425.71  399.77
   1  -1 -15  385.11  432.21
  -1   1  15  238.50  200.44
   4  -6  -9 3778.87  366.72
  -4  -6   9 3492.56  388.79
  -4   6   9 3704.20  662.49
   9  -1   3 6753.53  688.49
  -9  -1  -3 6949.21  521.55
   9   1   3 6787.80  685.10
  -9   1  -3 7049.14  492.78
  -3   7   6 6652.06  666.18
   3  -7  -6 6181.59  585.69
  -3  -7   6 6026.36  603.50
   3   7  -6 6341.77  552.80
   3   7  -6 5953.93  520.52
  -5   6   8 3354.33  431.00
   5   6  -8 4059.38  376.85
  -5   6   8 3579.43  355.33
  -5  -6   8 3890.38  358.11
   5  -6  -8 4376.41  410.15
  -5  -6   8 3845.65  416.75
   1  -7   6 6715.72  681.08
  -1  -7  -6 6541.34  630.80
   1   7   6 6222.13  631.78
  -1   7  -6 6200.77  565.47
   1  -3 -1411453.71  846.86
  -1  -3  1410356.30  679.14
  -1   3  1411271.91  828.09
   6  -6  -6 2407.31  285.01
  -6  -6   6 2088.45  298.37
  -6   6   6 3204.88  560.89
   6   6  -6 3115.03  430.25
  -6  -6   6 2833.73  692.87
  -8   3  -4 7485.53  516.67
   8  -3   4 5610.26  588.40
  -8  -3  -4 5908.66  584.40
   8   3   4 6724.08  894.23
   7   0   8 7363.64  563.49
  -7   0  -8 7089.88  683.67
   8   0   6 8237.72  620.22
  -8   0  -6 8838.00  663.96
   1   6   9 1463.42  308.68
  -1   6  -9  865.60  168.53
  -1   6  -9 1109.20  215.66
  -1  -6  -9 1601.87  269.01
  -3   0 -13 4654.85  506.24
   3   0  13 4453.61  484.98
   6   2   9 6118.06  773.47
  -6  -2  -9 5231.40  576.33
   6  -2   9 5354.54  548.69
  -6   2  -9 6025.83  631.43
  -8  -4  -2  989.83  241.52
   8  -4   2 1002.62  264.94
   8   4   2 1504.05  333.26
  -8   4  -2 1287.08  353.68
 -10  -1   2 4266.32  408.68
 -10   1   2 4536.58  416.29
  10   1  -2 4147.87  719.13
  10  -1  -2 4618.90  499.96
  -4  -3  14 1875.85  259.20
  -4  -3  14 2061.50  296.13
   4  -3 -14 2140.84  288.13
  -4   3  14 1731.85  360.21
   6   5   5 3354.69  393.72
  -6  -5  -5 3394.33  508.08
   6  -5   5 3156.00  397.34
  -4  -6  -614950.98  990.27
   4  -6   615534.17 1041.64
   4   6   613651.21 1251.12
  10  -1  -6 3670.65  421.61
 -10  -1   6 4001.61  381.92
 -10   1   6 3436.16  308.51
  10   1  -6 3661.51  407.69
  -5   0 -11 1037.13  600.28
   5   0  11 1057.35  297.93
  -4  -1 -1211362.54  776.75
   4  -1  1211513.85  840.72
  -4   1 -1211975.77  821.31
   4   1  1211325.94  800.51
 -10   0   1 6796.29 1145.96
  10   0  -1 7128.06  858.58
   6  -4   7 1991.48  279.24
   6   4   7 1741.81  319.36
  -6  -4  -7 2089.94  335.46
   1   5  11 1150.39  547.93
   1  -5  11 1583.52  199.80
  -1  -5 -11 1561.61  417.04
   7   5  -8 1723.84  230.07
  -7   5   8 1894.45  298.52
  -7  -5   8 1653.20  282.19
   7   4   5 5624.81  648.99
   7  -4   5 4062.34  443.34
  -7  -4  -5 4346.34  457.86
   4  -4 -13 5146.90  575.07
  -4  -4  13 5560.19  503.10
  -4  -4  13 5624.06  500.45
  -4   4  13 6209.78  668.17
   1  -7  -7 2523.32  325.65
  -1  -7   7 2312.67  553.05
  -1   7   7 2287.84  402.95
  -6  -3  13  228.94  162.48
  -6   3  13  204.78  198.94
  -6  -3  13  337.72  191.88
   6  -3 -13  320.21  225.13
  -7  -3  1218617.81 2970.50
  -7   3  1217463.44 1205.84
   7  -3 -1217982.68 2860.56
  -7  -3  1220012.44 3195.46
   7  -3 -1217813.44 1083.71
   4   7  -5 2975.68  373.96
  -4  -7   5 3025.40  406.23
   4  -7  -5 3204.90  540.88
  -4  -7   5 3158.30  377.69
  -4   7   5 2617.46  398.66
  -3  -7  -4 8283.02  603.02
   3  -7   4 8586.53  699.89
   3   7   4 9089.19  724.31
  -3   7  -4 9183.59  638.14
 -10   0   712667.40  814.21
  10   0  -711905.46  737.16
  10   0  -713304.28  933.57
  -2   6  10 4929.34  568.78
   2  -6 -10 3969.30  415.64
  -2  -6  10 3988.40  431.12
  -5   0  1511315.83  767.93
  -4   7  -2  264.72  249.98
   4   7   2  287.01  116.45
  -4  -7  -2  608.79  390.65
   4  -7   2  615.48  204.82
  -1  -2 -14 1390.68  510.04
   1   2  14 1253.92  312.13
   1  -2  14 1002.57  224.29
  -7  -1  -8 5419.84  567.75
   7  -1   8 5013.65  528.06
  -7   1  -8 4105.93  478.12
   7   1   8 3593.01  435.34
  -8   1  -6 3806.34  416.27
  -8  -1  -6 3397.03  458.41
   8  -1   6 3648.11  415.73
   8   1   6 3798.58  536.57
   3  -1  13 6411.72  629.41
  -3   1 -13 5935.03  619.67
   3   1  13 3623.09  405.71
  -3  -1 -13 6369.52  632.26
  -5  -5  -7 1853.11  295.28
   5   5   7 2124.03  321.70
   5  -5   7 1816.36  266.26
  -2   7   7 9751.86  704.67
  -2  -7   7 8002.74  838.58
   2  -7  -7 7896.34  590.10
  -7   2  13 4484.21  752.56
  -7  -2  13 3857.30  400.48
   7  -2 -13 3984.34  380.91
   7  -2 -13 4087.25  394.65
  -1   6  10 4148.45  464.23
   1  -6 -10 4700.35  495.64
   2  -5 -12 6350.98  628.49
  -2   5  12 5201.06  565.34
  -4  -3 -11 2828.32  409.75
   4   3  11 2237.43  501.39
   4  -3  11 2711.04  358.90
   3  -2 -15 3416.56  368.72
  -3  -2  15 3812.83  401.17
  -3   2  15 3210.97  568.91
   0   0  15 1032.36  262.12
   0   0 -15  742.28  210.34
  -5   1 -11 3451.35  525.13
   5   1  11 3867.61  593.36
  -5  -1 -11 3407.39  377.57
   5  -1  11 3723.40  408.54
  -2  -2  15  741.79  198.57
   2  -2 -15  792.16  270.57
  -2   2  15  876.92  294.47
  -5  -5  11 8359.59  693.48
  -5   5  11 6065.09  709.71
  -5  -5  11 7091.04  425.73
   5  -5 -11 7998.20  561.50
   3  -4  11 3290.87  333.37
   3   4  11 3770.81  601.30
  -3  -4 -11 3251.19  580.55
   9  -3  -8 6095.73  620.29
  -9  -3   8 7092.98  535.02
   9   3  -8 4327.78  440.89
   3  -3  12 2780.01  368.42
   3   3  12 3086.46  474.61
  -3  -3 -12 2572.50  369.50
  -6  -5  10 2329.10  284.93
   6  -5 -10 2829.13  333.10
  -6  -5  10 2597.23  474.20
  -6   5  10 3408.79  391.88
  10   1  -1  432.94  280.94
  10  -1  -1  742.63  281.34
 -10   1   1  440.16  166.76
 -10  -1   1  674.30  194.84
   6  -6   216845.03 1182.33
  -6  -6  -216562.40 1160.78
   6   6   219470.66 3187.21
   0  -7  -7 6718.23  642.67
   0  -7   7 6778.69  819.03
   0   7   7 6684.22  718.07
   4   4  10  936.05  253.82
   4  -4  10 1346.89  298.72
  -4  -4 -10 1303.21  334.68
  -9  -3  -1  343.28  251.35
  -9   3  -1  447.44  220.43
   9  -3   1  431.69  356.82
   9   3   1  433.42  279.50
  -3   5  12  833.14  269.66
   3  -5 -12  974.58  261.57
 -10  -1   7 5823.39  549.70
  10  -1  -7 4825.49  512.88
  10   1  -7 3718.57  409.50
  10  -1  -7 4595.62  404.20
   0   4  13 5370.99  876.58
   0  -4  13 5981.93  540.33
   0  -4 -13 5948.01  693.91
  -8   5   3  848.32  169.27
   8  -5  -3  733.82  333.25
  -8  -5   3  746.38  240.66
   8   5  -3  843.19  250.60
   6  -2 -1411211.58  771.58
  -6  -2  1412749.89  887.44
  -6   2  14 9804.15  793.31
   3  -6 -10 1844.14  248.16
  -3  -6  10 1984.98  528.56
  -3   6  10 2280.15  352.66
  -5  -1  15  704.15  189.03
  -5   1  15 1214.01  378.48
   5  -1 -15  664.17  232.08
   1  -5 -12 2367.35  334.29
  -1   5  12 2033.25  513.16
   2   0  14  869.56  480.41
  -2   0 -14  669.82  220.95
   8   5  -4 2628.00  423.72
  -8  -5   4 3108.05  537.01
   8  -5  -4 3066.91  471.24
  -6   4  1216718.56 1161.82
  -6  -4  1220398.41 3245.18
   6  -4 -1217940.91 1111.35
  -6  -4  1218196.50 2975.48
  -6  -4  1219767.87 3142.49
  -7  -5  -3 1398.58  370.79
   7  -5   3 1501.40  329.44
   7   5   3 1214.92  391.65
  10   2  -4 2527.81  567.49
 -10   2   4 2103.60  232.93
 -10  -2   4 2110.32  399.28
  10  -2  -4 2214.90  370.54
  -8  -5   2 2398.95  332.09
  -8   5   2 2519.48  302.33
   8  -5  -2 2421.79  364.23
   8   5  -2 2172.49  474.95
   6  -6  -7 7267.93  464.34
  -6  -6   7 6483.60  656.94
   6   6  -7 7071.77  512.38
  -6   6   7 7023.03  575.36
  -6  -6   7 6575.08  610.54
   0  -3 -14  606.24  225.94
   0   3  14  929.56  264.17
   0  -3  14  577.87  234.09
   0   1  15 8626.59  650.20
   0  -1 -15 6670.69  652.18
   0  -1  15 7482.48  540.69
   9   0 -11 9713.64  613.48
   9   0 -1110290.99  933.55
  -8   4   9 1648.62  278.51
  -8  -4   9 2422.47  517.49
   8   4  -9 1665.75  260.76
  10  -2  -3 2658.44  419.90
 -10  -2   3 2651.65  363.24
  10   2  -3 2402.54  339.85
 -10   2   3 2451.54  286.31
  10   0   0 1364.47  336.61
 -10   0   0 1373.38  250.53
  -4   2  15  994.22  293.95
  -4  -2  15 1418.49  351.18
   4  -2 -15 1370.44  352.05
   5  -3  10  420.88  158.14
   5   3  10  124.65  182.89
  -5  -3 -10  489.26  350.73
  10   2  -5 6882.65 1160.47
 -10  -2   5 6843.32 1145.96
  10  -2  -5 7053.87  687.94
  -9  -2  10 5230.02  507.96
  -9   2  10 4651.77  506.08
   9   2 -10 5418.10  538.02
  -8   2  1213916.79  963.75
  -8  -2  1213673.80  905.39
   8  -2 -1214179.06  881.39
   8  -2 -1214016.13  858.82
  -6   0 -10 5172.75  523.62
   6   0  10 4985.22  520.35
  -9   0  -4  979.97  221.47
   9   0   4 1116.82  293.99
   2   4  12 2500.35  376.83
   2  -4  12 2298.26  318.56
  -2  -4 -12 2362.62  345.89
  -3   7   7 5193.76  552.33
   3  -7  -7 6337.04  606.67
  -3  -7   7 6346.22  632.95
   0   6  10 4396.47  641.94
   0  -6 -10 4009.61  421.37
   1  -2 -15 4339.63  453.55
  -1   2  15 4674.73  515.95
  -1  -2  15 4997.85  545.64
   9  -2   310457.29  762.99
  -9  -2  -310019.07  707.14
   9   2   310245.68  742.05
  -9   2  -310646.36  700.33
 -10   0   8  152.14  147.86
  10   0  -8  208.26  204.40
  10   0  -8  154.94   52.05
  -5  -7   2 7159.57  545.00
   5   7  -2 6862.11 1116.17
  -5   7   2 6407.83  656.61
   5  -7  -2 6963.05  515.02
   8   5  -5 2596.59  364.72
  -8  -5   5 2444.64  448.33
   7  -4 -11 3455.30  320.67
   7  -4 -11 3691.19  335.30
  -7   4  11 3356.48  538.93
  -7  -4  11 3456.70  531.37
   4   7  -6 1711.03  270.95
  -4  -7   6 2324.91  557.61
  -4   7   6 1640.90  512.73
  -4  -7   6 2400.65  365.53
   4  -7  -6 2877.79  488.34
  -5  -3  1417611.53  453.65
  -5   3  1413598.65 1272.65
   5  -3 -1417471.71  386.31
  -5  -3  1417113.66 1367.65
  -2   1 -14 5464.78  647.39
  -2  -1 -14 6280.74  572.72
   2  -1  14 6620.85  579.12
   2   1  14 5355.51  636.74
   9  -4  -4 6233.92  669.48
  -9  -4   4 7163.66  644.01
   9   4  -4 4848.39  576.90
  -8  -3  11   63.99  136.99
  -8   3  11  126.58  147.47
   8   3 -11  106.93  188.42
   0   8   0 7808.13  690.88
   0  -8   0 8135.64  713.87
   9  -4  -3 3866.29  490.44
  -9  -4   3 4160.17  501.48
   9   4  -3 4376.92  550.92
  -5   7   1 2481.17  544.41
   5   7  -1 2621.51  429.36
   5  -7  -1 2749.42  461.13
  -5  -7   1 2250.95  399.04
   2   3  13 3062.89  792.02
  -2  -3 -13 2697.66  458.45
   2  -3  13 2629.35  442.72
   5  -7  -3 1873.76  327.35
  -5   7   3 1617.68  294.76
  -5  -7   3 2142.88  395.18
   5   7  -3 1617.81  347.77
  -7   0  14  220.77  283.29
   5  -4   9 5254.79  696.56
  -5  -4  -9 5150.42  610.71
   5   4   9 6088.80  573.55
  -2  -7  -6 1661.38  301.51
   2   7   6 1304.14  315.44
  -2   7  -6 1390.41  246.76
   8  -5  -1 4029.23  523.24
  -8  -5   1 3632.54  442.88
   8   5  -1 3421.71  434.67
  10  -2  -2 2149.30  436.08
  10   2  -2 2501.48  708.36
 -10  -2   2 2813.49  457.77
 -10   2   2 2256.01  359.03
  -5  -6  -5   67.85  128.17
   5   6   5   35.33  101.69
   5  -6   5  106.21  117.35
   4   7   3 2888.23  503.76
  -4   7  -3 3183.98  381.29
  -4  -7  -3 3468.79  559.19
   0   8   1  164.31  212.15
   0  -8  -1  200.33  134.78
   0  -8   1   96.93  118.95
   0   8  -1  199.57  134.11
  -8   4  -3 2335.15  384.72
   8  -4   3 2335.62  402.95
  -8  -4  -3 2363.64  523.04
   8   4   3 2575.09  749.79
  -7   3  -7 4271.94  502.36
  -7  -3  -7 4793.27  720.74
   7   3   7 4453.52  893.59
   7  -3   7 4667.66  554.41
  10   2  -6 3414.27  426.58
 -10  -2   6 4615.07  518.67
  10  -2  -6 4441.68  545.38
  -9   1  11 5627.16  658.51
   9   1 -11 4857.79  627.04
   9  -1 -11 5344.01  571.59
  10   1   0 2179.40  398.43
 -10   1   0 2208.20  355.50
  10  -1   0 2174.07  397.40
 -10  -1   0 2064.10  347.17
   5  -6  -9 3384.65  388.88
  -5  -6   9 3281.11  424.18
  -5   6   9 2541.76  441.40
   4   2  12 3678.40  474.47
  -4  -2 -12 2576.21  453.57
   4  -2  12 2480.02  411.55
  -4   2 -12 3652.70  462.00
   9   4  -5 1415.79  329.02
   9  -4  -5 1423.43  338.31
  -9  -4   5 1263.45  266.76
  -5  -4  13 4619.10  505.58
  -5   4  13 3459.49  460.99
  -5  -4  13 4323.95  477.57
   5  -4 -13 4251.22  525.83
  -9   4   210461.91  812.18
   9   4  -2 9171.93  997.03
  -9  -4   2 9871.83 1069.82
   9  -4  -210701.25  950.37
   4  -5 -12 1557.54  328.88
  -4   5  12 1307.27  320.59
  -6  -1 -10 7458.84  660.44
  -6   1 -10 8912.59  972.72
   6   1  10 8815.40  966.41
   6  -1  10 8905.54  777.40
   1   8   0   47.64   63.17
   1  -8   0    3.20   47.62
  -1   8   0   35.66   47.49
  -1  -8   0   78.02  108.18
   9   1   4 7851.78  722.52
   9  -1   4 7014.49  687.99
  -9   1  -4 6437.53  557.12
  -9  -1  -4 6519.54  767.93
  -3  -6  -8 6541.29  642.22
   3   6   8 5561.53  673.27
   3  -6   8 6448.80  560.60
  -1  -8   113563.76 1124.24
   1  -8  -114161.93 1182.07
  -1   8   111572.78  986.99
   1   8  -111994.60 1024.84
  -1   7  -7  780.13  156.73
  -1  -7  -7  845.84  197.11
   1   7   7  793.45  212.20
   1  -7   7  874.52  357.60
 -10  -1   8 2302.24  381.34
  10  -1  -8 2124.33  385.62
  10   1  -8 2125.40  485.58
  10  -1  -8 1915.37  284.99
  -8   0  13 3419.44  427.37
  -7  -5   9 3675.21  456.97
  -7   5   9 3454.36  453.14
   7   5  -9 3344.52  400.63
  -5   7   0 8556.73  737.66
   5  -7   0 8116.41  717.53
  -5  -7   0 8820.40  765.96
   5   7   0 8415.89  821.49
  -3   7  -5 3162.30  384.96
   3   7   5 3037.33  506.85
  -3  -7  -5 3062.55  505.43
   2  -6   9  539.07  114.39
   2   6   9  591.95  225.04
  -2  -6  -9  586.41  202.97
   0   5  12 4988.27  689.71
   0  -5 -12 5074.40  780.91
  -5   7   4 4237.77  595.04
   5   7  -4 4565.21  518.01
  -5  -7   4 4220.33  512.77
   5  -7  -4 3688.80  416.30
  -3  -5 -10 6036.65  566.40
   3   5  10 5481.35  713.07
   3  -5  10 6413.64  577.36
  -7   6   3 2200.29  388.86
   7   6  -3 2248.26  478.24
  -7  -6   3 2430.15  465.03
  -7   2  -8 4095.88  481.35
   7  -2   8 4363.34  538.91
   7   2   8 4379.19  589.67
  -7  -2  -8 3801.53  465.42
  -8  -2  -6 2985.70  484.40
  -8   2  -6 2738.62  449.36
   8  -2   6 3246.04  701.49
   8   2   6 2535.92  476.89
   3  -2  13 2218.19  381.68
   3   2  13 2396.16  422.94
  -3  -2 -13 2181.98  391.96
  -7  -1  14 4573.82  585.31
  -7   1  14 4586.73  551.19
   0  -8  -2 4108.52  492.66
   0   8  -2 3708.32  457.28
   0   8   2 4307.74  527.38
   0  -8   2 3921.50  544.31
   1   8   111225.54  977.14
  -1  -8  -115901.44 1309.96
   1  -8   116265.65 1331.92
  -1   8  -114281.65 1164.05
  -8   5   6  660.85  245.79
  -8  -5   6 1359.23  317.23
   8   5  -6  834.08  195.19
  -7   6   2  249.40  136.37
  -7  -6   2  151.82  198.01
   7   6  -2  280.90  312.44
  -4  -6  10 1393.08  282.25
   4  -6 -10 1352.33  249.64
  -4   6  10 1304.63  306.38
  -9   3   9  700.86  202.69
   9   3  -9  819.30  219.94
  -9  -3   9  782.48  196.01
  -8   3  -5 6997.29  613.17
  -8  -3  -5 7729.90  687.56
   8   3   5 7110.52  921.50
   8  -3   5 7141.91  648.35
  -6  -6  -3 3997.54  615.96
   6  -6   3 4181.40  549.41
   6   6   3 3721.39  476.67
  -1   8   2  303.60  113.07
   1  -8  -2  252.60  237.32
  -1  -8   2  314.95  232.36
   1   8  -2  220.27  224.26
  -5   2 -11 3403.39  456.36
   5   2  11 3304.99  438.59
  -5  -2 -11 4348.05  545.75
   5  -2  11 4546.01  546.74
   9  -3   2  290.99  303.14
   9   3   2  516.94  200.72
  -9  -3  -2  435.54  308.13
  -9   3  -2  527.51  143.44
  -7   6   4  153.94  125.17
  -7  -6   4  105.44  242.08
   7   6  -4  175.87  234.13
   4   5   9 1746.80  369.53
  -4  -5  -9 2293.30  406.74
   4  -5   9 2175.84  364.92
 -10  -2   1 2508.16  409.71
 -10   2   1 3135.06  363.25
  10  -2  -1 2568.56  460.03
  10   2  -1 2980.07  499.18
  -8  -5   0 2154.27  608.56
   8   5   0 2188.10  383.39
   8  -5   0 2011.74  425.04
   9  -4  -6 4255.38  550.51
   9   4  -6 5868.59  450.85
  -9  -4   6 6263.03  572.10
  -6   0  15  150.94  203.71
  -1   7   8 9816.77  864.03
  -1  -7   8 7469.54  734.39
   1  -7  -8 7341.12  676.50
  -6  -5  -6 7660.97  679.05
   6   5   6 7295.07  670.49
   6  -5   6 7652.05  728.47
   9  -4  -1 6305.14  600.27
   9   4  -1 6807.07  643.63
  -9  -4   1 6229.55  596.60
  -9   4   1 6979.17  564.55
  10  -2  -7 4112.31  719.90
 -10  -2   7 4469.58  525.21
  10   2  -7 2408.64  412.31
  -2  -7   8 2655.21  450.72
   2  -7  -8 2654.01  428.37
  -2   7   8 3143.31  421.21
  -8   1  13 7571.46  668.44
  -8  -1  13 7398.13  647.67
   4  -6   7  135.73   93.89
   4   6   7   98.00  170.65
  -4  -6  -7  159.20  170.39
   7  -6  -1  585.15  463.08
  -7  -6   1  677.49  196.27
   7   6  -1  653.20  201.98
  -2  -5 -11 2164.70  411.55
   2  -5  11 2330.38  372.28
   2   5  11 1959.93  576.11
  10   0   1 7475.65  768.42
 -10   0  -1 8284.45  750.77
   5  -2 -15 1499.24  275.71
  -5  -2  15 1658.42  300.52
  -5   2  15 1853.19  344.80
   6  -3   912245.40 1043.83
   6   3   9 9386.54  840.65
  -6  -3  -911611.85  995.01
  -6   3  -910387.40  952.49
  -6  -6   8 2895.48  568.42
   6   6  -8 2163.53  346.69
  -6   6   8 2028.82  388.05
   6  -6  -8 2846.23  434.03
  -1  -8  -2  706.35  442.03
  -1   8  -2  658.41  172.12
   1   8   2  504.13  151.88
   1  -8   2  699.52  214.79
   7   4   6 3013.77  529.83
   7  -4   6 3087.58  408.32
  -7  -4  -6 3087.41  279.59
  -5  -7  -1 1376.32  288.55
   5   7   1 1745.79  389.91
  -5   7  -1 1891.28  332.77
  -3   0  16  782.21  203.54
  -1   0 -15 8579.51  754.94
   1   0  15 8517.47  762.95
  10   0  -9 8735.47  967.44
   1   4  13 5133.09  697.97
  -1  -4 -13 4591.58  585.15
   1  -4  13 4803.19  570.45
   5   7  -5 2400.88  417.04
   5  -7  -5 3125.88  397.96
  -5  -7   5 3357.04  511.62
  -5   7   5 2341.37  404.73
  -2  -8   1  865.69  200.69
  -2   8   1  888.40  304.10
   2   8  -1  879.55  191.80
   2  -8  -1  947.64  219.22
   0   2  15 5535.52  659.60
   0  -2  15 4152.31  501.89
   0  -2 -15 4484.64  532.29
  -8   0  -7  892.35  271.13
   8   0   7  804.81  450.04
  -7  -6   5 2904.92  540.16
   7   6  -5 2143.75  349.28
  -7   6   5 2179.24  388.93
   1   8  -3 8548.55  716.19
   1  -8  -3 9638.00 1083.42
  -1   8   3 7763.14  680.67
  -1  -8   3 9199.03  799.39
   0  -8   3  531.31  423.75
   0   8   3  627.46  159.99
   0   8  -3  709.80  290.63
   0  -8  -3  649.84  202.96
   1   6  10 6860.19  697.63
  -1  -6 -10 6301.26  569.06
   2   8   0 3805.32  592.49
   2  -8   0 3894.66  518.31
  -2   8   0 3765.49  470.38
  -2  -8   0 3492.94  484.03
  -2   0  16  323.72  376.83
  -7  -5  -4 2730.60  457.11
   7  -5   4 2120.00  534.83
   7   5   4 4130.18  522.65
   6  -1 -1514578.25 1182.16
  -6  -1  1519314.86  643.12
  -6   1  1513531.70 1166.80
  -4   7   7 1846.54  582.46
  -4  -7   7 2730.17  463.81
   4  -7  -7 2795.42  483.18
   0  -7   8 4878.58  772.40
   0   7   8 4414.23  864.37
   0  -7  -8 4780.42  571.72
   2  -8  -2 4778.05  748.96
  -2   8   2 4009.87  601.54
   2   8  -2 5293.95  601.80
  -2  -8   2 4723.63  566.18
   2  -4 -14 7988.30  703.02
  -2  -4  14 7585.71  599.72
  -2   4  14 6305.33  828.41
   3  -4 -14 4159.59  488.77
  -3  -4  14 3912.21  419.05
  -3   4  14 4938.40  662.25
  10  -1   1 1322.48  580.52
 -10  -1  -1 1636.12  360.41
 -10   1  -1 1162.72  230.19
  10   1   1 1381.42  306.58
  -8   4  10 7533.82  704.78
  -8  -4  10 7768.42  712.49
   8   4 -10 6836.90  679.53
   2   2  14 2295.69  424.81
  -2  -2 -14 2032.90  363.51
   2  -2  14 2075.38  347.87
   8   5  -7 3829.94  465.87
  -8   5   7 3664.75  576.46
  -8  -5   7 4756.37  568.06
  -6   5  11 8145.70  731.58
  -6  -5  11 6912.64  565.00
  -6  -5  11 7285.39  842.46
   6  -5 -11 7982.94  649.90
   1  -3  14 8859.56  729.30
  -1  -3 -14 8732.12  761.36
   1   3  14 8078.78  840.65
   6   4   8 2674.99  710.27
   6  -4   8 2607.06  438.54
  -6  -4  -8 2483.02  434.04
   4   7   4  680.65  179.28
  -4  -7  -4  922.65  233.14
  -4   7  -4  836.58  273.13
   7  -6   0   51.20  121.81
   7   6   0   52.58  104.69
  -7  -6   0   45.19  110.69
   7  -3 -13   21.86   45.46
  -7   3  13  101.68  142.73
  -7  -3  13   47.27   88.64
   7  -3 -13   38.67   53.21
  -4   0  16  139.70  245.48
  -3   7   8 6632.27  694.55
  -3  -7   8 7035.97  646.47
   3  -7  -8 6329.73  609.09
  -3   1  16 4328.44  522.67
   3  -1 -16 3492.09  428.72
  -3  -1  16 3165.16  386.73
  -2   8  -1  538.37  251.98
  -2  -8  -1  386.00  280.16
   2   8   1  595.87  176.75
   2  -8   1  413.75  263.66
   9   4  -7  812.82  223.71
   9  -4  -7  631.60  412.51
  -9  -4   7  447.29  135.85
   7   0   9   -7.12  146.26
  -7   0  -9   -4.44  110.15
   1  -1  15 4383.33  523.13
   1   1  15 3430.07  452.52
  -1  -1 -15 4239.17  601.55
  -3   3  15 3240.18  477.82
   3  -3 -15 3474.74  430.99
  -3  -3  15 3376.75  404.89
   2  -6 -11 2823.02  466.47
  -2   6  11 3195.65  444.70
  10  -1  -9 7055.56  683.85
 -10  -1   9 7718.58  673.80
  10   1  -9 5712.88  351.75
   5  -5   8 9976.76  843.77
   5   5   8 9346.19  836.30
  -5  -5  -810380.97  890.61
   2  -3 -15  174.18  159.02
  -2   3  15   53.33  102.51
  -2  -3  15  149.97   86.02
   9   2 -11 2296.73  441.36
  -9   2  11 2906.91  486.43
  -9  -2  11 2507.47  438.66
  -8   1  -7 1690.94  350.94
  -8  -1  -7 1588.41  337.15
   8  -1   7 1868.65  373.10
   8   1   7 1647.03  765.65
   9  -4   0 9817.93  965.96
  -9  -4   0 9716.74  838.97
  -9   4   0 9013.55  727.04
   9   4   0 8379.84  746.41
 -10   2   0  478.74  173.84
  10  -2   0  591.00  371.37
  10   2   0  398.53  398.25
 -10  -2   0  689.95  161.25
  -2   1  16 1596.79  307.32
   2  -1 -16 1379.99  309.29
  -2  -1  16 1172.60  253.28
   8   5   1 6108.43  581.84
   8  -5   1 6337.04  583.56
  -8  -5  -1 6702.68  599.77
   6  -2  10 2222.84  444.16
  -6   2 -10 2082.53  382.20
   6   2  10 1896.62  390.75
  -6  -2 -10 2241.02  406.05
  -9   2  -4 4744.76  556.00
  -9  -2  -4 4308.96  514.85
   9   2   4 4225.35  536.80
   9  -2   4 4257.08  588.01
  -5  -5  12 4042.58  590.54
   5  -5 -12 4565.32  510.47
  -5   5  12 4413.79  561.29
  -2  -8   3  999.04  606.01
   2  -8  -3 1078.60  224.79
   2   8  -3 1071.35  198.10
  -2   8   3 1320.92  356.11
 -10  -2   8 5135.13  584.32
  10  -2  -8 5717.58  349.59
  10   2  -8 4220.12  532.50
  -1   8  -3 9316.24  760.40
   1  -8   310586.57  898.85
   1   8   311648.43 1113.55
  -1  -8  -311075.56  955.14
  -1   6  11 6523.20  673.39
   1  -6 -11 6273.39  562.74
  -9   0  12  181.29  261.21
   6  -3 -14 4581.21  523.38
  -6   3  14 4118.89  576.56
  -6  -3  14 4584.49  532.57
   1  -4 -14 3412.17  426.88
  -1  -4  14 3397.63  378.36
  -1   4  14 3828.12  497.73
  -7  -6   6  396.54  370.82
  -7   6   6  220.36  181.71
   7   6  -6  228.19  199.37
  -8  -4  -4 1205.02  280.64
  -8   4  -4  939.96  225.54
   8   4   4 1019.57  292.69
   8  -4   4  984.24  238.80
   3  -6 -1114092.52 1180.54
  -3   6  1116372.52 1421.87
  -3  -6  1114031.90 1186.31
   7  -2 -14 1169.59  234.50
  -7   2  14 1514.94  211.34
  -7  -2  14 1145.13  229.46
  -9   0  -5 3428.27  531.22
   9   0   5 3767.91  585.78
   1   0 -16 1658.00  314.62
  -1   0  16 1895.54  342.31
  -5   7  -212657.30 1044.80
   5   7   214079.87 1348.26
  -5  -7  -212599.58 1110.17
  -2   7  -7 1865.29  293.79
   2   7   7 1742.83  443.88
  -2  -7  -7 1819.54  351.08
  -1  -5 -12 2482.28  423.46
   1   5  12 2614.24  473.54
   1  -5  12 2794.04  430.08
 -10  -3   412301.56 1016.63
  10  -3  -412643.42 1078.28
  10   3  -414169.36 1202.68
   4  -1 -16  679.02  372.30
  -4  -1  16  772.62  197.91
  -4   1  16  569.48  433.27
  -1   8   4 1439.65  331.88
  -1  -8   4  879.51  226.20
   1   8  -4 1546.88  115.10
   1  -8  -4  910.14  369.81
  -7  -1  -9 1732.55  320.12
   7  -1   9 1853.12  536.16
   7   1   9 2060.29  636.09
  -7   1  -9 1923.43  496.68
  -4  -4  1411167.32  872.19
   4  -4 -1411132.39  918.06
  -4   4  1413777.98 1219.90
  -5  -7   6 2559.32  514.01
   5   7  -6 3214.76  391.85
  -5   7   6 3046.89  536.22
   5  -7  -6 2666.96  425.89
  -4   0 -13  781.03  188.74
   4   0  13   99.41  184.23
   5   6   6 7771.10  778.94
  -5  -6  -6 6653.08  604.93
   5  -6   6 7486.12  641.39
 -10  -3   3 2786.29  454.32
  10  -3  -3 3410.19  475.16
  10   3  -3 3251.05  439.47
   0  -8  -4 2396.06  411.57
   0   8  -4 2280.96  356.93
   0   8   4 2258.79  406.40
   0  -8   4 2168.81  415.26
   4  -3 -15  494.76  178.90
  -4   3  15  469.76  342.82
  -4  -3  15  442.86  115.55
  10   3  -5 1242.15  330.36
 -10  -3   5 1597.78  277.71
  10  -3  -5 1333.49  327.60
   6  -6   417169.75 1434.58
  -6  -6  -415864.86 1427.94
   6   6   414995.21 1294.86
   2   8   2 5546.48  649.49
  -2  -8  -2 5040.59  688.20
  -2   8  -2 5395.72  601.75
   2  -8   2 4645.91  542.21
   9   3 -1012362.83 1026.02
  -9  -3  10 9701.45  864.39
  -9   3  1013145.12 1098.08
   7   5 -10 1006.69  219.50
  -7   5  10 1179.84  272.51
  -7  -5  10 1090.03  284.92
   7  -5 -10  952.12  162.95
  -3  -7  -6 5513.88  804.37
  -3   7  -6 5498.17  615.54
   3   7   6 5344.80  646.08
  -8   3  12 3979.12  554.63
   8  -3 -12 4281.38  459.25
  -8  -3  12 3932.83  513.58
  -8  -3  12 4687.51  569.60
  -5   6  10 2175.25  426.85
  -5  -6  10 3096.07  404.10
   5  -6 -10 2839.35  456.92
  -6  -4  13 3156.99  354.64
  -6   4  13 3686.68  470.39
   6  -4 -13 2990.74  458.00
  -7  -4  12 6326.17  587.05
  -7   4  12 7007.61  647.85
   7  -4 -12 6006.22  492.10
  -7  -4  12 6098.65  526.28
   2  -5 -1310136.17  928.80
  -2   5  1311274.58 1012.75
  -1   3  15 6482.07  623.65
  -1  -3  15 5699.70  634.50
   1  -3 -15 5425.90  626.95
  -9   3  -3 1627.56  269.73
   9  -3   3 1399.84  379.31
  -9  -3  -3 1610.59  458.41
   9   3   3 1569.07  511.87
  -9   1  12 2774.71  467.90
   8  -2 -13 1259.57  231.60
  -8  -2  13 1153.57  241.35
  -8   2  13  939.09  404.61
  -5   0 -1214654.98 1240.26
   5   0  1215019.14 1383.74
   7  -6   1 1040.73  295.76
  -7  -6  -1  961.02  620.05
   7   6   1 1009.17  237.63
 -10   0  -2 3337.60  426.95
  10   0   2 3357.99  450.53
   3  -5 -13 4106.02  518.31
  -3   5  13 5198.28  646.56
   1   7   8 5697.36  709.80
  -1  -7  -8 3792.94  460.85
   9  -1   5 1757.91  360.24
   9   1   5 1808.71  425.85
  -9   1  -5 1912.27  370.69
  -9  -1  -5 1662.84  398.24
  -1  -1  16 1782.16  458.99
   1  -1 -16 1894.97  415.11
  -1   1  16 2130.59  377.53
   3   0  1410563.70  893.25
  -3   0 -1410196.90 1126.13
 -10  -3   213777.63 1138.85
 -10   3   215407.09 1188.82
  10  -3  -217094.23 1437.92
  10   3  -216455.04 1381.60
   2  -8  -4 2116.15  365.17
   2   8  -4 1481.13  138.04
  -2   8   4 1902.79  663.15
  -2  -8   4 1969.25  375.44
   4   4  11 8552.70  768.35
   4  -4  11 5903.55  531.81
  -4  -4 -11 5899.38  316.65
  -4   1 -13 3745.10  488.92
  -4  -1 -13 3899.44  485.30
   4  -1  13 4105.90  507.75
   4   1  13 3994.59  500.62
  -3  -8   111409.68  975.74
   3  -8  -112146.64  992.71
  -3   8   111972.19  996.39
   3   8  -112553.34 1032.05
  10   3  -6 9269.29  809.32
  10  -3  -6 7967.31  761.56
 -10  -3   6 9899.21  856.60
  10   0 -10  691.26  362.73
  -8  -5   8 2482.60  418.45
  -8   5   8 2299.32  435.36
   8   5  -8 1996.41  327.64
  -5   0  16   27.98  101.85
   9   4  -8 4925.07  569.06
  -9   4   8 4239.85  771.50
  -9  -4   8 4411.76  542.74
   3  -4  12  826.26  272.71
  -3  -4 -12  831.26  241.13
   3   4  12  796.20  708.79
   3   8  -2  929.36  228.74
   3  -8  -2  947.47  209.77
  -3  -8   2  938.39  290.95
  -3   8   2 1258.64  357.79
   4   3  12  171.57  247.97
  -4  -3 -12  182.71  211.84
   4  -3  12  231.58  364.23
  -6   6   9 5391.16  677.03
   6  -6  -9 4654.83  514.78
  -6  -6   9 4857.77  580.30
   6   6  -9 4816.47  533.42
   0  -6 -11 1408.35  291.63
   0   6  11 2022.41  620.56
   6  -2 -15 1091.08  227.83
  -6  -2  15  800.32  180.73
  -6   2  15 1088.68  293.87
   9  -4   110245.62  987.82
  -9  -4  -110501.81  885.24
   9   4   110544.00  937.06
  -9   4  -111252.36  911.35
  -1   5  13 1056.85  278.88
   1  -5 -13 1755.83  333.55
   3  -8   0  484.45  137.07
  -3   8   0  450.26  148.28
   3   8   0  508.77  178.07
  -3  -8   0  543.74  393.07
  -5   1 -12 3464.68  449.69
   5   1  12 3208.83  439.15
   5  -1  12 3285.03  429.68
  -5  -1 -12 3375.68  622.13
  10   2   1 2813.61  609.95
  10  -2   1 3018.57  581.50
 -10  -2  -1 3116.29  391.06
 -10   2  -1 2784.71  430.58
 -10   1  -2 2665.45  433.53
 -10  -1  -2 2350.65  459.67
  10  -1   2 2210.15  438.33
  10   1   2 2527.01  506.39
  -4   7   8 3308.83  437.46
  -4  -7   8 2985.49  558.51
   4  -7  -8 2840.11  450.24
   1   8   4 1759.97  339.49
   1  -8   4 1419.04  317.99
  -1   8  -4 1571.56  262.19
  -1  -8  -4 1246.04  371.54
  -7   6   7 4819.27  598.23
  -7  -6   7 4322.39  631.16
   7   6  -7 5115.80  593.03
   7   3   8  126.33  138.19
  -7   3  -8   92.49  117.72
   7  -3   8  112.42  121.29
  -7  -3  -8  105.10  152.02
  -8  -3  -6 6118.10  664.56
   8   3   6 7048.91  671.74
   8  -3   6 6068.46  571.69
  -8   3  -6 6322.51  596.62
   3   6   9  816.53  220.43
  -3  -6  -9  895.50  323.21
   3  -6   9  854.58  171.89
   3   3  13 6836.52  653.48
  -3  -3 -13 7193.22  653.81
   3  -3  13 6765.73  605.31
  -2   7   9 5579.08  773.28
   2  -7  -9 5406.04  652.77
  -2  -7   9 5764.88  359.67
  -4  -6  11 2016.69  637.07
  -4   6  11 2346.91  431.92
   4  -6 -11 2254.64  361.96
  -1  -7   9 2102.55  403.10
  -1   7   9 2871.62  634.38
   1  -7  -9 2177.28  376.11
  -3  -1 -14 2160.35  477.19
  -3   1 -14 2241.61  398.25
   3   1  14 2482.95  432.18
   3  -1  14 2082.96  436.54
  -8  -5  -2 1050.29  267.96
   8  -5   2 1059.00  368.51
   8   5   2  244.35  288.37
  -3  -2  16 2326.97  454.77
   3  -2 -16 2580.03  580.04
  -3   2  16 2699.35  484.66
   3  -8  -3 6700.10  620.63
  -3  -8   3 6365.81  615.98
  -3   8   3 6973.42  666.21
   3   8  -3 6574.99  629.29
   1   2  15 2907.79  507.26
  -1  -2 -15 3373.86  481.66
   1  -2  15 3055.83  490.91
  10  -2  -9 2222.86  643.16
  10   2  -9 3273.05  417.80
 -10  -2   9 2597.92  463.67
  -6  -7   2 1757.39  329.38
   6   7  -2 2029.64  477.30
  -6   7   2 2061.22  362.17
   2  -8   3  313.20  233.29
   2   8   3  486.48  398.40
  -2   8  -3  362.04  300.73
  -2  -8  -3  204.31  112.66
   0   4  14 8678.77  790.96
   0  -4  14 7734.84  624.35
   0  -4 -14 8087.29  727.52
   5  -3  11 9634.46  914.48
   5   3  11 9603.67  909.41
  -5  -3 -11 9367.26  812.21
   8  -2   7 3742.71  531.92
   8   2   7 2865.07  505.11
  -8   2  -7 2917.96  470.48
  -8  -2  -7 3452.93  451.54
  10  -1 -10  987.36  247.78
  10   1 -10 2298.17  456.14
 -10  -1  10 1219.43  237.07
  -6   7   3 2603.47  680.07
   6   7  -3 2563.33  412.17
  -6  -7   3 2122.01  381.71
   6  -7  -3 2036.66  336.90
   5  -1 -16 5211.03  631.89
  -5  -1  16 4558.82  551.00
  -5   1  16 3912.08  688.38
  -4  -7  -5 3349.60  430.48
   4   7   5 3698.75  470.03
  -4   7  -5 2678.49  438.08
   5  -4  10 4170.77  555.72
   5   4  10 4160.03  595.47
  -5  -4 -10 3945.50  492.20
  -1   8   5 7901.73  709.47
   1   8  -510031.57  786.06
   1  -8  -5 9670.98  899.60
  -1  -8   5 8452.88  739.00
   2  -2 -1613497.70 1215.43
  -2  -2  1613402.75 1098.37
  -2   2  1613795.99 1210.89
  10   3  -1 6090.11  754.89
  10  -3  -1 6300.07  599.98
 -10   3   1 5928.07  487.57
 -10  -3   1 6452.34  569.67
  -8   0  14   41.44  121.51
  -6  -5  -7 3851.92  510.02
   6   5   7 4109.87  582.37
   6  -5   7 3606.74  444.54
  -7   0  15 8914.91  777.00
   2   6  10 5140.01  638.89
  -2  -6 -10 4024.66  534.86
   2  -6  10 4007.18  441.35
   5   7   3 1779.12  361.77
  -5   7  -3 1600.68  285.71
  -5  -7  -3 1639.43  339.22
  -3   8  -110919.25  963.19
   3   8   112423.23 1064.94
   3  -8   111718.88 1007.88
  -3  -8  -111243.67 1131.76
  -7  -5  -5 1878.50  629.45
   7   5   5 1189.13  336.26
   7  -5   5 1679.82  484.93
  -4   5  13 9399.39 1039.78
   4  -5 -13 9435.19  786.61
   6   0  11  701.60  210.39
  -6   0 -11  744.25  290.51
 -10  -3   7  447.65  119.19
  10   3  -7  445.86  189.79
  10  -3  -7  517.05  293.94
  -6   7   1 2921.21  485.54
   6   7  -1 3252.78  406.53
  -6  -7   1 2303.82  411.77
   5   7  -7 7539.82  596.48
   5  -7  -7 7321.05  617.91
  -5  -7   7 8065.55  712.91
  -5   7   7 7806.00  697.40
   4   6   810531.12  928.05
  -4  -6  -811044.57  962.13
   4  -6   811921.55  980.18
  -5  -3  15  892.81  174.05
  -5   3  15  746.33  276.41
   5  -3 -15  712.29  249.69
   0   8  -5 1242.56  219.05
   0  -8   5  665.18  228.18
   0  -8  -5  675.59  185.06
   0   8   5 1285.24  263.95
   5  -4 -14 3214.51  403.31
  -5   4  14 2724.96  636.12
  -5  -4  14 3475.09  411.59
   0   0  16   56.35   63.05
  -8   4  11 1546.46  243.50
   8   4 -11 1822.45  364.01
  -8  -4  11 2335.29  544.28
   6  -7  -4 2845.58  475.20
   6   7  -4 3111.03  392.58
  -6  -7   4 3151.03  527.48
  -6   7   4 3122.74  429.99
   2   4  13 7021.71  676.52
  -2  -4 -13 6107.42  606.19
   2  -4  13 6095.15  516.32
  -4   2  1610940.81 1220.40
  -4  -2  16 9678.09  804.40
   4  -2 -16 9553.71  803.02
   7  -6   2 1706.32  393.74
  -7  -6  -2 1938.79  351.95
   7   6   2 1817.36  592.17
  -7  -2  -9 5426.96  766.77
  -7   2  -9 5577.23  638.05
   7  -2   9 5697.93  669.17
   7   2   9 5475.45  676.18
  -3   7   9 5400.64  709.37
   3  -7  -9 3891.90  473.12
  -3  -7   9 3749.26  504.14
   2  -8  -5 2337.35  387.69
   2   8  -5 2469.12  377.16
  -2  -8   5 2083.89  515.00
  -2   8   5 2660.59  592.95
  -7  -4  -7 7355.51  668.49
   7   4   7 7670.49  838.62
   7  -4   7 7587.48  811.43
   0  -3  15  812.36  112.56
   0  -3 -15  857.29  180.92
   0   3  15  994.54  273.22
   3   5  11 1966.93  375.44
  -3  -5 -11 2127.53  497.84
   3  -5  11 2123.07  350.63
   2   0  15 1270.80  292.71
  -2   0 -15 1561.56  318.80
   0   7   9 1296.61  193.69
   0  -7  -9 1487.94  264.67
  -3   8   4 1369.04  267.70
  -3  -8   4  712.97  228.80
   3  -8  -4  608.67  176.61
   3   8  -4 1323.55  109.93
  -8   1  14  409.22  288.84
  -8  -1  14  469.05  144.32
  -4  -5 -10 5349.69  724.98
   4   5  10 4557.11  565.88
   4  -5  10 5011.96  636.62
  -7   1  15  490.54  116.77
  -7  -1  15  787.67  145.08
 -11   0   4  682.01  137.71
  11   0  -4  861.83  556.19
 -11   0   5 2747.64  388.97
  11   0  -5 2268.28  390.16
  -6  -1 -11  243.82  377.88
   6  -1  11  604.81  152.61
   6   1  11  488.67  420.36
  -6   1 -11  392.42  540.18
   9   2 -12 3512.11  429.77
  -9   2  12 3881.01  487.63
   9  -2 -12 3647.13  382.21
  -6   7   0 2548.61  606.06
  -6  -7   0 2638.82  450.49
   6   7   0 2498.83  393.13
   0  -5 -13 6032.38  703.46
   0   5  13 7197.51  703.93
  -2  -3 -14  132.53  194.33
   2   3  14  235.93  309.21
   2  -3  14  128.81  102.02
   0  -1  16 2087.17  442.39
   0   1  16 1849.90  370.91
   0  -1 -16 2262.11  482.87
 -11   0   3  281.45  123.26
  11   0  -3  204.21  172.38
   6  -5 -12 2563.77  376.18
  -6  -5  12 2423.27  338.80
  -6  -5  12 2636.69  529.72
  -6   5  12 1931.86  369.93
   3  -8   2  168.67  101.31
  -3   8  -2  313.35  270.93
   3   8   2  361.56  301.49
  -3  -8  -2  130.58  220.29
  -9  -2  -5 5319.18  609.73
  -9   2  -5 6015.82  554.93
   9   2   5 5160.77  633.86
   9  -2   5 5245.57  794.97
  -1  -2  16 1827.20  311.11
  -1   2  16 2154.81  402.79
   1  -2 -16 1859.74  348.75
  -9  -4   9 1812.38  401.07
  -9   4   9 1037.83  206.99
   9   4  -9 1193.47  132.96
  -6   7   5 3474.70  437.38
   6  -7  -5 3559.10  411.04
   6   7  -5 3365.67  404.79
  -6  -7   5 3570.89  454.41
  -8  -4  -5 2515.68  442.32
   8  -4   5 2572.50  419.34
   8   4   5 1756.34  331.42
  -8   4  -5 1752.00  282.25
   8   0   8 2553.44  503.40
  -8   0  -8 2472.35  567.73
   6   6   5 2088.00  373.56
   6  -6   5 2197.19  493.80
  -6  -6  -5 2333.19  422.49
   4  -2  13 6946.41  639.19
  -4  -2 -13 6437.72  561.95
   4   2  13 6043.14  549.23
  -4   2 -13 6110.92  739.79
   9   3 -11 1041.55  251.87
  -9   3  11 1248.29  212.07
  -9  -3  11 1183.94  143.22
  11   0  -6  805.88  545.57
 -11   0   6  761.38  103.50
   8   5  -9 8425.70  708.79
  -8  -5   9 8465.36  781.77
  -8   5   9 8842.97  745.98
  -9  -4  -2 8775.90  754.25
  -9   4  -2 8334.46  663.49
   9   4   2 9229.73  790.08
   9  -4   2 9036.46  812.97
   2  -1  15 6336.92  536.24
   2   1  15 4494.09  550.37
  -2   1 -15 4644.10  584.04
  -2  -1 -15 6280.48  560.39
  10   3   015805.37 1293.43
 -10   3   016591.50 1242.96
  10   0   3 3868.72  496.71
 -10   0  -3 3974.51  473.51
  -1  -6 -11 1425.74  496.08
   1   6  11 2067.82  393.97
  -6  -3 -10  182.55  189.10
  -6   3 -10  130.77   98.72
   6   3  10   51.14  141.60
   6  -3  10  126.92  218.86
  11   1  -4 1688.90  353.03
 -11  -1   4 2330.98  398.55
 -11   1   4 1954.36  278.37
  11  -1  -4 1749.27  489.10
   7   6  -8  747.29  102.04
  -7  -6   8  723.18  199.10
  -7   6   8  770.74  238.70
   7  -6  -8  455.65   71.62
  -1   8  -5 6444.52  492.72
   1  -8   5 6510.44  709.49
  -1  -8  -5 6749.46  571.09
   1   8   5 7571.66  645.54
  -9   3  -4   45.86   60.61
  -9  -3  -4   89.47   70.60
   9  -3   4   65.94  144.13
   9   3   4  -12.81  137.69
   2   5  12 5728.21  626.53
   2  -5  12 4100.12  478.97
  -2  -5 -12 4195.78  648.82
  -2  -8  -4 2168.57  369.91
   2  -8   4 2215.47  382.53
  -2   8  -4 2248.72  360.89
   2   8   4 2330.39  556.66
  11   1  -5 9706.37  804.86
  11  -1  -5 9506.11  799.90
 -11  -1   5 9660.92  755.15
  -2   7  -8 3258.58  352.39
   2   7   8 3282.80  500.10
  -2  -7  -8 2933.71  235.67
  -9   0  1311776.64 1021.64
  10   3  -8 8047.50  756.40
  10  -3  -8 4292.82  536.87
 -10  -3   8 5742.95  475.45
   5   2  12 4431.55  548.26
   5  -2  12 4218.75  505.69
  -5  -2 -12 4530.38  559.88
  -5   2 -12 5002.07  593.93
  -3   7  -7 1991.79  297.46
   3   7   7 2048.88  603.30
  -3  -7  -7 1976.42  570.74
  -7  -5  11 3448.92  427.94
  -7   5  11 3238.21  436.17
   7  -5 -11 3667.45  396.53
  -6   0  16  123.81  140.34
 -10   2  -2  843.07   99.20
  10   2   2  847.10  638.74
  10  -2   2 1059.80  361.90
 -10  -2  -2 1178.16  191.27
  -9  -5   4 3022.58  654.72
   9  -5  -4 2530.21  538.29
   9   5  -4 3673.45  519.00
   9   5  -3 7826.00  703.58
  -9  -5   3 7836.52  674.10
   9  -5  -3 8872.19  745.77
  10   0 -11 6745.49  666.33
   6  -4   9 5429.07  639.10
   6   4   9 5336.72  683.98
  -6  -4  -9 6009.40  576.57
   5   6   7  561.71  629.00
  -5  -6  -7  604.67  210.33
   5  -6   7  533.52  215.71
  11   1  -3 8271.02  791.83
 -11  -1   3 7189.67  562.77
 -11   1   3 8285.30  629.38
  11  -1  -3 7690.24  937.11
  -7  -3  1416956.54 1337.34
   7  -3 -1419492.78  372.15
  -7   3  1417984.49 1495.40
 -11   0   2   13.23   63.66
  11   0  -2   12.77   72.91
  -5  -5  -9 1721.07  384.82
   5   5   9 1952.38  353.94
   5  -5   9 1755.19  298.64
   9   0   6 3370.43  499.69
  -9   0  -6 3296.13  419.11
  -3  -2 -14 2346.74  402.82
   3  -2  14 2339.57  367.37
   3   2  14 1661.93  320.17
   2  -6 -12 3362.27  421.52
  -2   6  12 3307.74  805.10
  -8  -1  -8 5186.58  606.61
   8   1   8 5476.66  659.21
  -8   1  -8 4915.50  566.73
   8  -1   8 5014.98  609.17
  -1   8   6 1472.07  288.56
  -1  -8   6 1496.58  481.26
   1  -8  -6 1760.42  304.84
   8  -5   3 2692.18  509.02
  -8  -5  -3 2734.32  431.41
   8   5   3 2557.19  507.59
  -3  -8   5 7517.23  851.14
  -3   8   5 8183.35  899.05
   3   8  -5 8426.91  624.09
   3  -8  -5 7830.78  667.26
 -11  -1   6  737.07  186.40
  11  -1  -6  716.31  287.81
  11   1  -6  356.36  404.49
 -10  -2  10 7169.52  566.89
  10  -2 -10 5766.69  686.88
  10   2 -10 6408.21  583.06
  -5  -2  16  461.38  116.65
   5  -2 -16  445.31  332.12
  -5   2  16  264.93  218.34
  -6  -7  -1 2187.35  362.38
  -6   7  -1 2472.55  392.10
   6   7   1 2413.05  409.09
  -5  -6  11 7395.81  645.97
  -5   6  1111039.31  912.38
   5  -6 -11 7156.59  564.92
 -10  -1  -3 1923.39  314.20
  10   1   3 1995.24  491.45
  10  -1   3 2104.79  409.80
 -10   1  -3 1671.69  291.70
  -6  -6  10  369.91  305.07
   6  -6 -10  327.87  150.39
  -6   6  10  324.80  197.26
  -6  -6  10  291.46   93.38
   4  -8  -2 2162.22  361.63
  -4  -8   2 2131.42  381.28
   4   8  -2 2089.81  327.46
  -4   8   2 2103.64  354.25
  -9  -5   510663.14  881.20
   9   5  -513018.88 1102.70
   9  -5  -510578.00  933.98
  -4   8   1  272.31  277.41
   4  -8  -1  505.28  260.52
   4   8  -1  371.83  298.17
  -4  -8   1  542.33  174.60
   5  -5 -13 5059.62  601.59
  -5   5  13 4797.21  605.33
   9   5  -2 2404.41  408.92
  -9  -5   2 1795.46  323.63
   9  -5  -2 1863.36  440.72
 -11   0   7 4172.64  449.08
  11   0  -7 4177.29  519.66
  -5  -7  -4 9624.45  796.44
   5   7   4 8786.20  919.80
  -5   7  -4 9159.52  804.23
   4  -7  -9 4735.17  524.93
  -4   7   9 5459.99  658.07
  -4  -7   9 4683.83  561.03
  -9   1  13 2042.71  376.24
  -9  -1  13 2747.30  422.30
   3  -6 -12 2560.10  392.90
  -3   6  12 2147.65  398.07
  -8  -3  13  664.54  138.05
  -8   3  13  878.29  567.07
   8  -3 -13  611.19   74.04
  -8  -6   310808.23  885.77
   8   6  -311134.41  944.63
  -5  -7   8 1912.28  370.27
   5  -7  -8 1722.71  289.20
  -5   7   8 1388.68  340.16
  -2   8   6 3157.64  629.07
   2  -8  -6 3323.75  512.51
  -2  -8   6 2803.00  440.06
  -6   1  16  288.53  278.56
   6  -1 -16  258.04  262.58
  -6  -1  16  341.00  319.52
  -1   6  12 5464.09  772.50
   1  -6 -12 5294.35  623.78
   0   8   6 2571.32  513.87
   0  -8   6 2415.52  436.23
   0  -8  -6 2353.87  371.20
   6   7  -6 3682.38  423.84
   6  -7  -6 4112.99  465.08
  -6   7   6 3523.00  473.41
  -6  -7   6 4746.77  566.97
  -1  -4 -14 1094.64  181.36
   1  -4  14 1169.38  153.65
   1   4  14 1168.17  804.58
  -4  -8   3  226.26  181.27
   4  -8  -3  193.93  167.36
   4   8  -3  360.77  177.44
  -4   8   3  299.72  283.19
  10  -1 -11 6811.46  605.84
  10   1 -11 5563.81  639.76
   1   7   9 1087.50  190.99
  -1  -7  -9 1497.27  269.60
   7   0  10 4983.76  656.19
  -7   0 -10 4797.35  568.11
  -8   6   4 5664.81  662.55
   8   6  -4 5966.01  536.36
  -8  -6   4 5706.16  544.86
  11   1  -2  792.21  637.49
 -11  -1   2 1021.69  117.94
 -11   1   2  651.15  121.80
  11  -1  -2  672.12  554.66
   7  -4 -13 4265.00  477.44
  -7  -4  13 4326.41  528.30
  -7   4  13 4091.20  658.34
   9   1   6 5780.08  543.65
   9  -1   6 6409.14  616.27
  -9  -1  -6 5987.78  513.12
  -9   1  -6 6041.18  533.63
   4  -8   0 5058.68  576.68
   4   8   0 4605.62  555.12
  -4  -8   0 5168.81  610.15
  -4   8   0 4845.33  581.01
   7  -6   3   19.67   75.77
  -7  -6  -3  104.72  145.53
   7   6   3  101.88  268.77
   3  -8   3 6995.76  671.45
   3   8   3 6997.53  634.65
  -3  -8  -3 6994.78  702.49
  -3   8  -3 6878.76  550.16
   8  -6  -2 5007.56  814.11
   8   6  -2 6110.50  537.46
  -8  -6   2 5198.36  609.83
  -3   4  15 3290.91  451.02
   3  -4 -15 5127.09  591.58
  -3  -4  15 4916.68  516.71
  -4  -7  -6 1809.60  453.27
   4   7   6 1843.67  734.41
  -4   7  -6 1666.10  345.46
  -2  -4  15 4537.72  503.74
   2  -4 -15 4706.32  551.15
  -2   4  15 3471.64  474.67
  -8   2  1410249.69  890.71
   8  -2 -14 8700.60  679.62
  -8  -2  14 7369.57  682.66
  11   1  -7 7468.25  697.64
  11  -1  -7 5960.24  709.88
 -11  -1   7 7237.94  570.10
   7  -2 -15 2466.55  364.37
  -7   2  15 2636.02  481.55
  -7  -2  15 2420.50  385.47
   9   5  -6 1661.42  420.65
  -9   5   6 1427.10  286.49
  -9  -5   6 1446.18  292.20
   6  -3 -15  213.74  172.25
  -6   3  15  313.99  231.14
  -6  -3  15  182.76  106.77
 -11   0   1    9.82   56.74
  11   0  -1   43.04  141.45
   9   5  -112198.52  972.44
   9  -5  -114444.35 1281.93
  -9  -5   113854.73 1107.75
  -3   0  1720734.51  644.76
  -6   2 -11 8367.12  694.41
   6   2  11 8446.99  734.49
   6  -2  11 6832.51  611.51
  -6  -2 -11 6121.09  545.47
  -8  -6   511334.08  921.37
   8   6  -511368.53  901.26
  -8   6   511418.33  992.40
  -6   4  1420520.94  708.54
  -6  -4  1418857.53  460.63
   6  -4 -1416732.40 1253.32
  -2  -7  10 7843.87  675.66
  -2   7  10 7314.39  705.63
   2  -7 -10 7862.95  757.55
 -10   3  -1 7866.74  646.54
  10  -3   1 7085.44  635.41
 -10  -3  -1 7220.77  597.55
  10   3   1 7890.09  693.38
   0  -2  1610876.62  890.56
   0   2  16 9367.65  820.66
   0  -2 -1611277.01  935.13
  -7   1 -10 2959.75  364.45
  -7  -1 -10 3327.98  424.46
   7  -1  10 3193.67  420.52
   7   1  10 2762.02  458.94
   1   0  16 2972.00  241.39
  -1   0 -16 3373.88  442.62
  -4  -8   4 2082.71  368.30
   4  -8  -4 1791.79  298.46
   4   8  -4 2436.40  367.41
  -4   8   4 2482.02  403.25
   8  -6  -110500.12 1095.74
  -8  -6   1 9275.02  755.49
   8   6  -110003.86  808.81
  10  -4  -4 1821.82  624.61
  10   4  -4 2301.40  393.69
 -10  -4   4 1784.16  297.64
   1  -7 -10 3064.66  385.50
  -1   7  10 2974.85  346.02
   7  -5   6 7102.35  632.58
   7   5   6 7015.87  634.48
  -7  -5  -6 7210.32  658.75
  -3  -3  1611087.66  834.54
   3  -3 -1610335.61  826.59
  -3   3  1611505.04  997.60
  -2   0  17   13.56   87.17
   2   0 -17   38.39   82.72
   1  -3  15 5319.21  665.56
   1   3  15 6160.76  596.68
  -1  -3 -15 5384.63  628.75
  -4  -8  -1  273.03  332.82
   4  -8   1  320.14  292.64
   4   8   1  221.45  204.83
  -4   8  -1  142.06  142.99
 -10  -3   9  274.25  143.25
  10  -3  -9  168.31  124.13
  10   3  -9  184.15  205.84
  -1  -5 -13 2366.92  433.70
   1   5  13 2759.35  496.01
   1  -5  13 2442.94  375.06
  11   0  -8  104.19  129.50
 -11   0   8  134.95   68.84
  -8  -3  -7 9736.77  851.52
   8  -3   7 9752.55  876.43
   8   3   7 9302.07  806.32
  -8   3  -710084.04  802.28
 -10  -4   3 4119.19  514.11
  10   4  -3 5167.09  654.29
  10  -4  -3 4727.60  819.85
   2   2  15 7554.98  677.06
  -2  -2 -15 7701.37  677.42
   2  -2  15 7742.78  726.46
   4  -4 -15 2186.93  350.87
  -4   4  15 1946.90  394.68
  -4  -4  15 2471.31  352.01
  -4   0  17   85.67  140.87
 -10  -4   5 3990.86  485.43
  10  -4  -5 4037.05  517.26
  10   4  -5 4186.96  707.17
  -9  -4  10 2571.97  399.00
   9   4 -10 3233.75  432.52
  -9   4  10 3349.26  439.84
  -2   3  16   76.81  131.73
  -2  -3  16    6.23   27.12
   2  -3 -16   58.74   99.09
   6   7   2 2052.27  349.34
  -6  -7  -2 2679.02  430.20
  -6   7  -2 1983.83  398.49
  -4  -6  12 1003.61  390.36
   4  -6 -12  949.96  179.99
  -4   6  12 1153.79  595.97
  -8  -4  1210114.83  777.19
  -8  -4  1211721.30  962.17
  -8   4  1210198.95  897.68
 -11  -2   416355.40 1238.68
  11   2  -414900.70 1415.11
  11  -2  -415422.73 1261.33
  -2  -8  -5 1903.05  342.88
   2  -8   5 1800.27  456.48
   2   8   5 1738.09  321.80
  -2   8  -5 2015.02  325.20
  11   1  -1 5741.93  534.79
 -11  -1   1 5312.10  584.32
 -11   1   1 5740.90  509.00
  11  -1  -1 5579.61  881.95
   3  -1 -17 1424.92  289.51
  -3   1  17  702.20  285.25
  -3  -1  17 1141.02  183.17
 -11  -2   5 1268.36  308.08
  11   2  -5 1007.76  449.67
  11  -2  -5 1282.32  224.72
  -1  -4  15 3677.02  427.99
  -1   4  15 3966.62  515.60
   1  -4 -15 3783.39  538.95
  -9   4  -3 4785.60  531.21
   9  -4   3 4339.37  561.70
   9   4   3 5001.83  618.89
  -9  -4  -3 4350.70  623.28
   3  -8  -6 2516.65  392.16
  -3   8   6 3143.61  450.57
  -3  -8   6 2691.39  482.33
  -2   5  14 5666.04  549.53
   2  -5 -14 5351.75  662.63
  -7   6   9 6436.76  851.56
   7   6  -9 6680.16  549.61
  -7  -6   9 7186.24  626.95
   3  -7 -10 4271.38  509.38
  -3   7  10 4264.06  560.54
  -3  -7  10 4051.14  569.34
  -3   5  14 2275.73  627.47
   3  -5 -14 1739.52  301.65
  -8  -5  10 1955.41  330.41
  -8   5  10 2189.72  386.84
   8   5 -10 2373.40  357.77
  -1  -8  -6 1315.63  305.53
   1  -8   6 1166.42  221.26
   1   8   6 1324.41  211.24
   0   6  12  654.89  541.39
   0  -6 -12 1023.84  230.72
   3   6  10 8679.24  794.68
  -3  -6 -10 8334.80  984.19
   3  -6  10 8923.02  713.14
   6  -5   8 7296.15  614.14
  -6  -5  -8 8005.91  900.68
   6   5   8 6672.18  721.04
  11  -2  -3  834.86  250.54
 -11  -2   3  696.29  216.87
  11   2  -3  782.62  211.37
  -1   1 -16 2253.45  383.00
   1  -1  16 2236.82  478.58
   1   1  16 2795.22  458.09
  -1  -1 -16 2436.39  403.82
   8   6  -6 2126.63  331.98
  -8   6   6 1980.91  426.17
  -8  -6   6 1809.57  367.95
   4  -3 -16  135.67  127.14
  -4  -3  16  173.71  105.65
  -4   3  16   98.38  203.72
  10   4  -2  595.22  157.61
 -10  -4   2  548.22  139.94
  10  -4  -2  479.20  439.09
  -2  -1  17 9992.98  841.59
   2  -1 -17 9967.16  816.09
  -2   1  1711119.16 1031.91
   9   5  -7 8806.86  724.47
  -9   5   7 8408.75  736.58
  -9  -5   7 8955.25  746.89
   7   3   910062.87  862.09
  -7  -3  -910021.22  866.10
  -7   3  -910179.64  827.16
   7  -3   9 9914.88  830.40
   6  -7  -7 2791.56  403.65
  -6   7   7 1883.36  329.93
  -6  -7   7 2505.54  511.16
   6   7  -7 2108.37  307.97
   8   2   8 1744.01  452.28
  -8   2  -8 1608.94  279.10
  -8  -2  -8 2217.21  370.18
   8  -2   8 2044.43  412.88
  11  -1  -8 1086.27  437.93
  11   1  -8 1051.29  241.92
 -11  -1   8 1279.54  225.96
  10  -4  -6 1718.73  388.64
  10   4  -6 1995.53  408.10
 -10  -4   6 1993.07  440.31
 -11  -2   6 9352.25  725.44
  11   2  -6 8254.78  701.12
  11  -2  -6 8044.60  706.31
   9   5   0 3324.01  429.81
   9  -5   0 3300.62  426.97
  -9   5   0 3236.41  361.76
  -9  -5   0 3153.33  412.30
   4   6   9  -88.72  147.60
   4  -6   9    9.38   65.14
  -4  -6  -9   11.14  102.81
   4  -1 -1711797.49  929.67
  -4   1  1712390.76  980.38
  -4  -1  1712418.03  966.97
 -10  -2  -3 4877.54  585.09
  10  -2   3 4948.99  610.83
  10   2   3 4933.14  624.65
 -10   2  -3 4994.75  554.45
   4   4  12  506.56  179.22
   4  -4  12  944.60  176.37
  -4  -4 -12  822.78  291.83
  10   0   4 5930.00  667.88
 -10   0  -4 6026.05  509.83
   8  -6   0 5866.20  643.48
  -8  -6   0 5758.18  514.82
   8   6   0 6915.54  647.35
  -6  -6  -610012.74  833.54
   6   6   6 9729.35  825.27
   6  -6   6 9888.58  893.91
   4   0  14 1674.19  335.35
  -4   0 -14 1899.01  336.78
   1  -8  -7 4292.77  524.99
  -1  -8   7 4418.29  760.03
  -1   8   7 4141.28  769.98
   0   7  10 5865.59  657.47
   0  -7 -10 5945.01  516.04
  -4  -8   5 2088.04  352.37
   4  -8  -5 2113.67  368.78
   4   8  -5 1665.29  261.46
  -4   8   5 1894.18  368.20
   3   8   4  131.46  194.10
  -3   8  -4  237.02  125.27
   3  -8   4  369.27  251.10
  -3  -8  -4  433.72  409.02
  -9   2  13 2489.78  423.08
   9  -2 -13 1983.34  282.32
  -9  -2  13 2007.04  343.79
  11   0   0  218.46  171.76
  -9  -3  1211492.70  898.29
   9   3 -1212122.16 1057.98
  -9   3  1212885.08 1030.37
  -8   0  15  121.67  151.73
  -5   0 -13  365.92  339.28
   5   0  13  320.61  475.77
   2   6  11  388.68  750.34
   2  -6  11  764.24  123.80
  -2  -6 -11  735.50  318.13
  -6  -2  1611505.60  904.68
   6  -2 -1610149.65  796.54
  -1   5  14 1341.99  259.59
   1  -5 -14 1353.17  217.16
   4   8   2 4627.45  580.43
  -4  -8  -2 3797.63  574.98
  -4   8  -2 4348.36  590.32
   4  -8   2 4030.68  705.16
   8   5   4 3588.56  476.57
  -8  -5  -4 4055.81  513.46
   8  -5   4 3684.41  461.60
  -7   4  -8 3079.40  385.43
   7  -4   8 2963.30  247.10
   7   4   8 3019.32  317.02
  -7  -4  -8 2962.23  247.03
  -8   4  -6 1641.55  291.39
  -8  -4  -6 1225.09  173.90
   8  -4   6 1334.69  199.79
   8   4   6 1896.98  363.75
 -10  -2  11  417.31  164.77
 -10   2  11  538.02  269.41
  10   2 -11  465.43  131.73
   3  -4  13 1670.72  275.36
   3   4  13 1728.44  610.53
  -3  -4 -13 1529.44  349.70
   1   0 -17 8861.35  741.66
  -1   0  17 9298.54  897.04
   2  -8  -7 5352.16  629.41
  -2  -8   7 5101.11  602.81
  -2   8   7 4141.18  530.74
  11   2  -211695.50  974.97
 -11  -2   2 9431.02  786.40
  11  -2  -2 9587.27  951.29
  -9   3  -5 2794.66  429.01
   9  -3   5 3157.67  564.35
   9   3   5 2533.63  490.27
  -9  -3  -5 2923.34  501.74
   1  -3 -1611316.77  888.49
  -1  -3  1611393.29  855.91
  -1   3  1612836.88 1033.40
   9   2   6 3870.77  674.91
  -9   2  -6 3710.95  498.06
  -9  -2  -6 3765.32  462.04
   9  -2   6 4496.23  552.12
   5  -7   5 4851.82  583.02
  -5  -7  -5 4519.31  545.72
   5   7   5 4209.33  800.85
   4  -5 -14 1521.34  264.19
  -4   5  14 1191.67  307.53
  -4  -3 -13  268.90  163.13
   4  -3  13  316.90  247.47
   4   3  13  527.41  379.94
  -5  -4 -11 1548.02  310.11
   5   4  11 1039.94  201.69
   5  -4  11 1375.94  241.27
  -5   0  1727402.05  696.66
  -5   7   9 4615.09  708.97
  -5  -7   9 4381.90  569.20
   5  -7  -9 4069.16  470.70
  10   4  -1 1972.49  581.95
 -10  -4   1 2309.06  402.93
  10  -4  -1 2458.56  449.72
   0  -8   7 1358.54  246.86
   0  -8  -7 1457.49  413.06
   0   8   7 1547.49  287.88
  11  -2  -7 1611.37  467.83
 -11  -2   7 1670.96  447.45
  11   2  -7  986.42  180.25
 -10   1  -4  988.22  158.52
 -10  -1  -4  940.30  223.52
  10  -1   4 1234.40  428.23
  10   1   4  877.22  179.25
   7   6   4 3338.77  579.13
  -7  -6  -4 3674.95  456.96
   7  -6   4 3529.29  438.41
  11   0  -9 7246.66  629.18
  -3   7  -8 4619.62  516.50
   3   7   8 4579.99  570.79
  -3  -7  -8 4789.72  630.06
  -4   1 -14 9268.34  806.71
  -4  -1 -14 8316.48  821.13
   4   1  14 8824.75  738.84
   4  -1  14 7891.99  884.03
   6  -5 -1310919.72  839.10
  -6  -5  1310815.09  955.76
  -6   5  1310203.24  907.47
  -7   5  12 5037.36  722.38
  -7  -5  12 4660.20  571.20
  -7  -5  12 4222.62  471.09
   7  -5 -12 4003.64  435.23
 -11  -1   0 1815.81  284.97
 -11   1   0 2228.80  338.65
  11  -1   0 1936.88  479.22
  11   1   0 2012.03  610.15
  10  -4  -7 3614.54  583.38
 -10  -4   7 2967.75  223.79
  10   4  -7 4200.03  523.67
   5  -3  12  431.66  385.85
   5   3  12  612.05  613.91
  -5  -3 -12  506.15  454.77
  -8  -1  1513954.92 1109.91
  -8   1  1515023.99 1203.66
   5  -1  13 1451.30  272.72
  -5  -1 -13 1642.96  305.71
  -5   1 -13 1350.24  201.23
   5   1  13 1642.13  326.95
   3   0  15 6382.69  560.03
  -3   0 -15 6198.96  552.25
   2   7   9 1211.50  301.93
  -2  -7  -9 1722.68  461.24
  -5  -4  15 3507.59  413.40
  -5   4  15 4701.90  620.29
   5  -4 -15 3496.21  448.60
 -10   3  -210546.19  854.98
  10  -3   2 9275.24  788.82
 -10  -3  -2 8433.42  737.11
  10   3   210518.25  874.97
  -8   6   710040.97  826.18
  -8  -6   710522.62  899.33
   8   6  -710893.55  890.43
  -7  -7   3 5842.63  595.97
  -7   7   3 4396.90  533.46
   7   7  -3 4720.73  616.91
   6  -6 -11 3427.68  414.83
  -6   6  11 2628.81  444.20
  -6  -6  11 3536.35  703.95
  -1  -1  17  253.57  223.01
   1  -1 -17  169.34  189.22
  -1   1  17  202.04  274.28
   7   2  10 3872.05  506.31
  -7  -2 -10 2745.45  583.23
   7  -2  10 3154.76  416.19
  -7   2 -10 3570.78  518.02
  -7   7   2 4841.32  642.64
   7   7  -2 4470.58  521.14
  -7  -7   2 4929.60  586.76
  -4   7  10 3569.43  472.90
   4  -7 -10 4101.80  482.27
  -4  -7  10 3988.20  499.31
  -3  -3 -14 2313.75  394.79
   3   3  14 2587.66  438.30
   3  -3  14 2190.78  383.90
  10   1 -12 1633.04  388.79
 -10   1  12 1702.39  378.27
  -6  -7  -3 3600.70  536.82
   6  -7   3 4418.50  599.87
   6   7   3 4603.77  565.61
  -4  -5 -11  579.32  189.46
   4  -5  11  632.05  272.06
   4   5  11  866.78  630.79
  -9   0  14  255.42  259.61
   5   6   8 8075.91  725.69
   5  -6   8 7590.25  707.56
  -5  -6  -8 7851.55  847.54
   0  -4  15 7249.59  553.19
   0  -4 -15 7558.04  837.96
   0   4  15 7012.15  647.63
 -10   3  10 5004.85  599.27
  10   3 -10 5231.37  625.88
 -10  -3  10 5909.78  569.07
  -5   3  1614633.16 1170.06
  -5  -3  1616375.37 1235.24
   5  -3 -1613317.75 1051.19
  -7  -7   4 5111.25  701.34
   7   7  -4 6707.13  555.23
  -7   7   4 6584.67  572.65
  -6   0 -12 3532.91  446.06
   6   0  12 3336.73  430.03
  -9  -5   8  570.35  133.34
   9   5  -8  720.09  280.28
  -9   5   8  710.19  225.64
   3   5  12 3255.49  473.05
   3  -5  12 3086.88  436.45
  -3  -5 -12 3157.36  433.89
  -5   1  17  835.49  179.50
  -5  -1  17  588.95  311.60
   5  -1 -17  775.78  137.53
   8  -6   1 8838.35  773.66
   8   6   1 8789.53  663.12
  -8  -6  -1 8158.89  511.12
   9  -5   1 6383.74  459.74
  -9  -5  -1 6262.80  409.48
   9   5   1 6089.06  592.12
 -11  -2   1  906.93  250.26
 -11   2   1  957.44   99.63
  11   2  -1 1031.98  361.82
  11  -2  -1 1053.88  263.09
  11  -1  -9 3266.46  531.59
 -11  -1   9 3027.28  374.91
  11   1  -9 3679.24  442.07
   7  -1 -16 3626.40  471.65
  -7   1  16 3527.25  426.46
  -7  -1  16 3906.67  474.46
  -9   0  -7 2184.11  221.59
   9   0   7 2227.30  566.82
   5  -6 -12  753.49  105.32
  -5  -6  12  783.68  205.99
  -5   6  12  449.25  195.05
   3  -8  -7 5631.75  353.72
  -3  -8   7 5200.60  472.31
  -3   8   7 5180.76  441.22
  -3  -2  17 1722.27  204.42
   3  -2 -17 1794.90  321.02
  -3   2  17 2577.29  402.52
   8   0   9  842.88  211.79
  -8   0  -9  725.16  137.80
  -5   8   2 3092.25  413.11
  -5  -8   2 3378.57  613.20
   5   8  -2 3248.26  419.18
   5  -8  -2 3092.32  369.12
  -4  -7  -7 2140.27  237.98
   4   7   7 2341.03  402.24
  -7   7   1 3938.98  458.19
   7   7  -1 5598.42  408.79
  -7  -7   1 4848.52  557.84
  -3  -1 -15 2518.41  349.34
  -3   1 -15 2270.21  517.72
   3  -1  15 2707.61  365.89
   3   1  15 2236.33  351.35
  -4  -8   6 2173.74  459.21
  -4   8   6 2135.90  298.95
   4  -8  -6 2206.34  206.55
   2   4  14 3754.15  485.03
  -2  -4 -14 3398.83  415.72
   2  -4  14 3523.55  458.96
  -5   8   1 6496.39  488.15
   5  -8  -1 5772.66  418.75
   5   8  -1 6480.40  555.86
  -5  -8   1 6337.61  485.04
  -5   8   3 7745.25  539.67
   5  -8  -3 5730.20  452.11
   5   8  -3 8448.37  554.38
  -5  -8   3 6812.07  501.98
   1   2  16  499.64  490.01
  -1  -2 -16 1035.15  469.89
   1  -2  16 1075.40  160.77
   2  -8   6 2277.12  348.20
  -2  -8  -6 2272.91  305.30
   2   8   6 1868.27  275.84
  -6  -7   8 4502.83  357.56
  -6   7   8 3818.03  488.30
   6  -7  -8 4330.00  186.91
  -1  -6 -12 6478.69  684.94
   1   6  12 6602.08  539.67
  -4   8  -3 2552.20  318.84
   4   8   3 3177.41  397.22
  -4  -8  -3 2911.83  451.53
  -2  -2  17  271.60  195.52
   2  -2 -17  297.55  292.33
  -2   2  17  444.30  480.52
  -9   1  14 4278.88  507.21
  -9  -1  14 3270.30  398.30
   0   5  14 4488.04  392.63
   0  -5 -14 4455.39  304.76
  11  -2  -8 4684.27  440.31
  11   2  -8 5074.12  427.10
 -11  -2   8 4910.94  394.13
   9   4 -11 3397.98  406.78
  -9   4  11 3530.29  450.19
  -9  -4  11 3830.81  588.47
  -7   7   5 5165.90  440.61
  -7  -7   5 5720.85  432.36
   7   7  -5 4832.20  352.30
   6  -1  12 7047.25  501.35
   6   1  12 8616.97  567.81
  -6   1 -12 9279.79  560.49
  -6  -1 -12 7553.22  540.66
  11   0   1  413.33  539.97
 -11   0  -1  461.20  116.38
  10  -4   0  761.61  362.22
 -10   4   0  693.09  157.44
 -10  -4   0  847.76  168.59
  10   4   0  780.17  205.80
   4  -2 -17   80.33  139.56
  -4   2  17   51.02  246.03
  -4  -2  17  168.93  166.44
   5  -5  10 5182.40  398.78
   5   5  10 5360.46  519.30
  -5  -5 -10 5116.99  399.12
   1   7  10 1171.34  350.93
  -1  -7 -10 1222.77  210.85
   8  -3 -14 3594.32  390.58
  -8   3  14 3353.08  517.77
  -8  -3  14 3258.04  404.09
  -7  -6  10 1036.58  411.92
  -7   6  10 1002.38  262.02
  -7   3  15  208.19  172.69
   7  -3 -15   93.55  141.01
  -7  -3  15  217.16  209.44
  -6  -4 -10 1417.38  543.63
   6   4  10 1333.76  639.31
   6  -4  10 1604.31  250.16
  -9  -4  -4 6305.38  467.20
  -9   4  -4 5376.59  334.43
   9   4   4 5145.13  418.46
   9  -4   4 5520.61  464.58
   9   1   7 1723.39  253.12
   9  -1   7 1617.44  205.86
  -9  -1  -7 1495.18  225.43
  -9   1  -7 1913.81  514.63
   2  -6 -13 2651.41  333.47
  -2   6  13 2812.35  402.36
   1  -8   7 5528.65  393.79
  -1  -8  -7 5054.61  361.30
   1   8   7 6034.65  464.27
  -8  -1  -9  971.90  223.79
   8  -1   9 1097.70  634.56
  -8   1  -9 1001.43  297.81
   8   1   9  753.90  691.05
   6  -3  11 2252.73  308.59
  -6   3 -11 2740.72  368.77
  -6  -3 -11 2378.08  328.96
   6   3  11 3025.86  590.51
  10  -4  -8 4721.59  396.79
  10   4  -8 5783.98  383.68
 -10  -4   8 4519.72  328.86
   5  -8   0 2885.28  371.68
   5   8   0 3099.58  427.08
  -5  -8   0 2992.83  387.24
  -5   8   0 2925.63  353.34
  -3  -8  -5 8182.62  507.39
   3   8   5 9902.88  637.35
   5  -8  -4 4263.05  460.28
  -5   8   4 3689.62  442.20
  -5  -8   4 4238.79  503.52
  -5   5  14 3312.29  490.51
   5  -5 -14 2248.05  325.70
   0  -3 -16  437.48  349.41
   0  -3  16  353.31  264.80
   0   3  16  408.89  382.86
  -8   5  11 8085.86  533.82
  -8  -5  11 8305.34  557.38
  -2  -5 -13 3477.65  444.22
   2   5  13 3812.88  573.06
   2  -5  13 3586.38  384.50
   3  -6 -1314145.97  733.89
  -3   6  1310703.91  694.80
  -7   7   0 5112.35  430.92
   7   7   0 5171.65  444.96
  -7  -7   0 5760.20  404.58
   7  -4 -14 1748.07  127.53
  -7  -4  14 1779.26  135.16
  -7   4  14 1099.50  507.70
   0   0 -17  133.80  343.00
   0   0  17  186.05  241.01
  -2   7  11 8576.08  669.22
   2  -7 -11 6649.87  404.49
  -7  -5  -7  548.90  646.90
   7   5   7  278.07  244.00
   7  -5   7  536.71  231.93
  -8  -6   8 1575.04  668.64
   8   6  -8 1418.35  313.87
  -8   6   8 1463.61  380.79
 -11   1  -1 6100.76  446.37
  11   1   1 6246.98  469.21
  11  -1   1 6305.92  494.13
 -11  -1  -1 5647.46  390.34
  -2  -3 -15  200.73  200.22
   2  -3  15  348.21  295.62
   2   3  15  443.19  299.59
  -2   0 -16  108.88  136.38
   2   0  16  124.40  187.27
  11   0 -10 1056.84  231.99
  10   2   4 2844.59  399.98
  10  -2   4 2518.93  359.79
 -10  -2  -4 3201.72  403.21
 -10   2  -4 2827.64  379.80
  11  -3  -4 1453.60  454.02
  11   3  -4 1074.40  213.19
 -11  -3   4 1483.44  152.39
   1  -8  -8 4055.98  602.27
  -1  -8   8 4111.97  563.18
  -1   8   8 4616.21  785.71
   1  -6 -13 7146.67  488.84
  -1   6  13 7117.40  725.43
  -4  -2 -14 1779.91  308.30
  -4   2 -14 1753.71  398.49
   4   2  14 1700.97  241.14
   4  -2  14 1828.93  193.93
  11  -3  -5  622.35  579.11
  11   3  -5  504.24  398.05
 -11  -3   5  552.26  253.37
  -6   0  17   45.66  184.20
 -11  -2   0 9148.98  628.14
  11  -2   0 9433.83  603.12
  11   2   0 9169.18  581.77
  -1   7  11 2511.47  446.82
   1  -7 -11 2819.61  348.68
  -2   8   8 2014.17  296.42
   2  -8  -8 1940.89  267.88
  -2  -8   8 1859.33  287.86
  -8  -4  13  150.53  147.22
  -8   4  13  265.60  377.94
  -8  -4  13  199.48  192.87
  -8   2  15  644.91  607.78
   8  -2 -15  721.97  125.75
  -8  -2  15 1011.92  303.55
  -5  -2 -13  995.12  203.68
   5  -2  13  964.70  162.88
  -5   2 -13 1291.98  372.69
   5   2  13 1139.71  208.47
   7  -7  -6 2998.23  331.18
  -7   7   6 2885.37  710.14
   7   7  -6 3346.62  384.41
  -7  -7   6 3055.03  755.87
   0  -9   0   62.82  116.41
   0   9   0  -13.80   84.55
  -1   2  17  817.64  216.79
   1  -2 -17  917.68  160.36
  -1  -2  17  873.70  127.73
  -3  -7  11 2279.88  391.54
  -3   7  11 1804.90  317.67
   3  -7 -11 2180.35  235.33
  11   3  -3  211.74  285.03
  11  -3  -3  163.43  132.96
   0  -1 -17 5349.61  401.56
   0  -1  17 4724.87  545.85
   0   1  17 5630.93  418.90
   8   6   2 7543.24  591.93
  -8  -6  -2 7642.63  513.22
   8  -6   2 7305.18  755.17
   9   5  -9 6336.13  534.10
  -9   5   9 6068.44  452.09
  -9  -5   9 6638.98  428.36
  -5   8  -1 6671.32  515.80
   5   8   1 7842.18  532.06
  -5  -8  -1 6871.86  461.84
 -10  -2  12 9416.96  561.41
 -10   2  12 8377.47  527.98
  10   2 -12 5835.02  416.13
  -8  -5  -5 1304.21  305.70
   8   5   5 1853.32  281.36
   8  -5   5 1401.46  202.21
 -10   0  -5 5494.97  406.85
  10   0   5 5070.17  461.51
   0  -9   110518.09  599.12
   0   9  -110552.22  642.41
   0   9   110490.51  724.72
   0  -9  -111584.69  652.62
  -8  -3  -8 1970.13  269.60
  -8   3  -8 2120.93  201.82
   8  -3   8 2185.42  459.52
   8   3   8 2381.88  378.76
  -5   8   5 4443.88  596.17
   5  -8  -5 3983.09  432.19
  -5  -8   5 4192.47  503.06
   5   8  -5 4518.00  287.62
  -5  -7  -6 8981.08  553.53
   5  -7   6 9237.93  511.93
   5   7   6 9219.50  755.10
  11  -3  -6 2345.50  428.97
 -11  -3   6 2154.67  236.70
  11   3  -6 2556.32  341.75
   7   0  11  795.25  455.96
  -7   0 -11  696.45  217.14
   9   5   2 3337.85  440.19
  -9   5  -2 3031.89  364.11
  -9  -5  -2 3106.26  388.15
   9  -5   2 3009.80  430.17
 -10  -3  -3 5032.94  422.71
 -10   3  -3 6377.55  383.81
  10   3   3 5491.27  433.95
  10  -3   3 5342.51  427.78
  -5   2  17 3239.47  424.35
   5  -2 -17 2676.80  322.56
  -5  -2  17 2790.16  352.41
  -2   1 -16 3698.64  467.28
  -2  -1 -16 4356.36  660.37
   2  -1  16 4455.60  267.62
   2   1  16 4195.43  508.56
  -6  -7  -4 2707.42  379.17
   6  -7   4 2547.96  335.19
   6   7   4 2890.72  417.12
 -11  -1  10 1197.23  112.71
  11  -1 -10 1268.12  284.06
  11   1 -10 1406.61  298.14
  -6  -6  -7  661.75  174.87
   6  -6   7  712.98  140.11
   6   6   7  950.96  371.40
  -6   4  15 1273.15  427.65
   6  -4 -15 1080.99  138.51
  -6  -4  15 1333.48  131.78
   1  -9   0   36.35   46.13
   1   9   0   34.16   90.75
  -1  -9   0   57.27  126.88
  -1   9   0   41.19   50.99
  -4   8   7 4953.75  470.09
  -4  -8   7 4171.98  506.21
   4  -8  -7 4142.83  489.76
   7  -6   5  249.74  248.29
   7   6   5  160.69  144.28
  -7  -6  -5  245.35  165.88
  11  -2  -9 1586.03  288.20
 -11  -2   9 1666.38  183.35
  11   2  -9 1570.33  271.96
  -7  -2  16   68.89  140.53
   7  -2 -16   56.60  133.51
  -7   2  16   15.56  118.99
  -4   6  13 2425.15  445.90
   4  -6 -13 2367.16  399.87
  -1   9   1  499.88  387.67
   1   9  -1  574.35  177.06
  -1  -9   1  651.77  364.83
   1  -9  -1  588.23  126.49
   5  -7 -10 4204.45  555.99
  -5   7  10 4256.09  526.16
  -5  -7  10 4306.91  493.73
   0  -8  -8 2023.41  208.26
   0  -8   8 1933.89  220.79
   0   8   8 2286.64  731.63
  -6  -1  1710655.24  600.17
  -6   1  17 9996.15  602.29
   6  -1 -17 9071.99  516.24
  -9   3  13   41.66  111.30
  -9  -3  13   47.36   77.72
   3  -2  15 2332.05  415.26
   3   2  15 2535.01  368.55
  -3   2 -15 2342.05  333.65
  -3  -2 -15 2546.49  381.02
   7   7   1 4824.41  423.15
  -7  -7  -1 3705.12  455.31
  10   4   1 2221.05  249.35
 -10  -4  -1 2338.12  571.86
  10  -4   1 2249.71  350.44
  -6   3  16  584.85  570.50
  -6  -3  16  472.07  235.98
   6  -3 -16  429.83  348.12
 -10   0  13 2961.79  394.47
 -10  -3  11  748.88  144.81
 -10   3  11  695.99  178.99
  10   3 -11  818.18  193.48
   6  -5   9 2175.13  211.00
   6   5   9 2433.68  582.42
  -6  -5  -9 1951.90  325.98
  -4   8  -4 2406.98  302.20
  -4  -8  -4 2187.38  232.18
   4   8   4 2115.47  236.27
  11  -3  -2 1221.97  431.35
  11   3  -2 1453.55  291.94
 -11  -3   2 1208.27  187.59
   0  -9   2  939.99  423.26
   0   9   2  704.03  149.54
   0  -9  -2  842.25  360.82
   0   9  -2  635.90  310.95
   1   9   1   78.96  138.58
  -1   9  -1  167.40  207.13
  -1  -9  -1  132.44  168.94
   1  -9   1  232.32  162.07
   9   3   6  117.12  161.17
  -9  -3  -6  436.22  365.37
   9  -3   6  154.26  165.15
  -9   3  -6  213.83  175.43
  -3   8   8 3462.03  464.12
   3  -8  -8 3726.39  520.78
  -3  -8   8 4108.35  552.28
   3  -4 -16  313.27  294.04
  -3   4  16  259.63  324.89
  10   1   5 1133.20  337.30
  10  -1   5 1278.22  254.13
 -10  -1  -5 1427.41  455.16
 -10   1  -5 1124.31  146.59
   1  -4  15 2693.25  412.06
  -1  -4 -15 3009.07  387.72
   1   4  15 3164.50  436.47
  -9   2  14  101.31  111.94
  -9  -2  14  430.54  122.06
   1   9  -2   51.39   43.79
   1  -9  -2  139.38  142.48
  -1  -9   2  146.63  108.23
  -1   9   2   20.80   92.36
  10   4  -9 2319.39  505.69
 -10   4   9 2605.01  455.02
 -10  -4   9 2573.53  429.36
  -8  -4  -7 5733.82  621.54
   8  -4   7 5419.08  605.44
   8   4   7 5732.31  931.27
  -8   4  -7 5112.90  343.95
   7  -1  11 1300.85  484.77
  -7   1 -11 1270.03  263.83
   7   1  11 1465.88  258.46
  -7  -1 -11 1281.97  469.29
  -3  -6 -11 2438.53  346.55
   3  -6  11 2372.75  296.17
   3   6  11 2023.81  328.92
   6   2  12 1459.24  688.10
  -6  -2 -12 1833.06  232.10
  -6   2 -12 1687.21  211.28
   6  -2  12 1563.51  320.59
  -6  -7   9 2848.32  377.14
   6  -7  -9 2241.04  211.05
  -6   7   9 3415.09  663.24
   2  -4 -16 7620.41  508.20
  -2   4  16 5388.14  439.39
   0  -7 -11 2459.44  555.11
   0   7  11 2258.06  636.91
   4   6  10 6665.14  859.38
  -4  -6 -10 7576.66  501.83
   4  -6  10 7585.51  492.01
  11  -3  -7  161.77  241.61
 -11  -3   7  161.82  143.30
  11   0   2  335.23  307.22
 -11   0  -2  506.51  232.16
  -9   2  -7 5400.68  419.62
  -9  -2  -7 5557.14  540.06
   9   2   7 5040.01  438.25
   9  -2   7 5582.65  432.79
   8  -2   9 5587.52  410.34
  -8   2  -9 5187.04  361.07
  -8  -2  -9 4825.55  365.33
   8   2   9 5380.39  434.29
   0  -6 -13  571.34  456.32
   0   6  13  563.26  269.66
 -10   1  13 5385.16  770.27
 -10  -1  13 6319.84  467.93
  -7  -7   7 7545.34  540.65
  -7   7   7 6371.70  485.39
  -1  -5 -14  835.80  184.75
   1   5  14  886.17  478.70
   3   7   9  810.42  194.79
  -3  -7  -9 1307.63  184.73
  -7  -3 -10  119.28  132.19
   7   3  10   22.05  166.42
   7  -3  10   43.33   77.04
  -7   3 -10   43.46   96.65
   6  -6 -12   29.60   58.30
  -6  -6  12  -15.80  115.54
  -6   6  12   35.92  169.23
  -4   7  11 5571.13  486.82
   4  -7 -11 4361.03  393.43
  -4  -7  11 4246.03  613.00
  -7   5  13 2256.26  538.79
  -7  -5  13 2948.96  497.20
   5   8   2 2155.08  366.54
  -5   8  -2 2612.93  364.94
  -5  -8  -2 3057.26  402.58
   2   8   7 2379.89  598.45
  -2  -8  -7 2434.36  529.87
  -1   9  -2  159.49  201.28
   1  -9   2  190.11  159.79
   1   9   2  210.33  205.15
  -1  -9  -2  273.44  177.76
  -4   4  16 8546.37  751.75
   4  -4 -16 7916.99  481.15
  -7   4  -9 6546.59  471.54
   7   4   9 6653.82  497.70
   7  -4   9 5769.06  660.43
  -7  -4  -9 5585.21  424.48
  -3   5  15 1451.44  226.71
   3  -5 -15 1447.87  356.88
  -5   8   6 7277.95  835.41
  -5  -8   6 8364.33  522.77
   5  -8  -6 7828.72  423.30
   2   9  -114992.23  795.25
  -2  -9   113913.14  851.12
  -2   9   114554.41  766.68
   2  -9  -114415.13  941.35
   2  -5 -15 9632.88  639.06
  -2   5  15 9442.22  909.13
  -8  -6   9 7821.80  489.03
  -8   6   9 6838.62  486.50
  11  -2   1 2195.84  382.81
 -11   2  -1 2601.45  378.76
  11   2   1 2576.86  375.57
 -11  -2  -1 1990.34  202.83
  -1   9   3 1147.33  209.79
  -1  -9   3 1122.81  189.35
   1   9  -3  875.91  216.46
   1  -9  -3 1259.86  342.53
   0  -9   3 7599.60  575.88
   0  -9  -3 7919.43  506.05
   0   9   3 7621.21  522.61
   2   9   0  526.19  141.77
  -2  -9   0  505.44  409.90
   2  -9   0  433.12  447.20
  -2   9   0  441.64  441.68
   3   8   6   39.62  271.25
  -3   8  -6  103.64  107.63
  -3  -8  -6  320.09  202.45
   2   7  10 4984.55  428.21
  -2  -7 -10 5360.88  661.33
  11   3  -1  408.99  370.29
  11  -3  -1  454.39  515.49
 -11  -3   1  403.53  319.13
  11   1   2 3829.53  497.91
  11  -1   2 3413.96  465.89
 -11   1  -2 3908.50  439.51
 -11  -1  -2 2939.51  357.24
   2   6  12 1638.91  283.48
  -2  -6 -12 1639.48  207.50
  -8   0  16  732.92  335.01
  -3   3  17 1237.29  228.68
   3  -3 -17 2186.48  281.68
  -3  -3  17 2203.15  160.16
  -2   9   2  277.66  318.93
   2  -9  -2  382.73  297.98
   2   9  -2  260.48  122.27
  -2  -9   2  357.65  330.67
   3   0 -18  696.15  146.84
  -3   0  18  626.62  198.97
  -9  -4  12 1720.03  283.30
   9   4 -12 2016.25  208.04
  -9   4  12 1846.35  250.60
   4   7   8 3220.83  453.38
  -4  -7  -8 3859.46  466.19
   4  -7   8 3863.98  425.47
  -7   6  11 7307.51  722.86
  -7  -6  11 7248.78  685.67
   6  -5 -14  542.49  209.15
  -6   5  14  388.61  343.65
  11   0 -11 5356.91  402.86
   9   6  -4  433.37  195.78
  -9   6   4  303.48  342.38
  -9  -6   4  241.03  192.05
   9  -6  -3 1019.35  342.17
   9   6  -3 1361.83  420.96
  -9  -6   3 1112.20  388.21
  -1  -3 -16 9331.14  585.39
   1   3  16 9186.71  608.88
   1  -3  16 9164.56  540.77
  -5  -6  -9  366.15  242.99
   5   6   9  354.95  516.12
   5  -6   9  249.88   81.11
   1   8   8 2074.04  299.11
  -1  -8  -8 2316.96  313.68
   0   2  17 3024.63  458.42
   0  -2  17 3432.41  420.27
   0  -2 -17 3380.75  522.62
  -9  -4  -5 3740.20  604.40
   9   4   5 3852.13  649.60
   9  -4   5 3459.86  575.80
  -9   4  -5 4045.45  470.66
   1  -4 -16 1503.71  239.87
  -1   4  16 1330.58  246.31
  10   5  -4 1752.91  318.70
  10  -5  -4 1577.28  242.98
 -10  -5   4 1965.10  267.53
   7  -7   2 8088.44  511.94
   7   7   2 7174.08  606.92
  -7  -7  -2 7506.60  515.36
  -2   9  -116878.66  492.60
   2  -9   116330.42  989.19
  -2  -9  -116760.58  582.12
   2   9   116949.11  521.70
  -2   3  17  304.54  300.27
   2  -3 -17  204.79  113.57
  -2  -3  17  233.68  233.84
  -4   0  18   40.43   97.67
  -4  -4 -13 4979.84  385.22
   4  -4  13 5150.12  340.17
   4   4  13 4438.90  345.15
   8  -6   3 6102.15  455.41
  -8  -6  -3 5424.71  392.43
   8   6   3 4598.89  723.77
  11   3  -8 4531.10  407.91
  11  -3  -8 4766.14  408.46
 -11  -3   8 4417.37  419.23
  -9   0  1512968.97  952.65
  10  -5  -3  323.74  377.53
 -10  -5   3  402.73  387.85
  10   5  -3  739.02  228.13
   1   0  17 6042.87  423.91
  -1   0 -17 6117.32  448.78
  -4   5  1511226.88  703.23
   4  -5 -1511159.98  594.68
  -4  -3  17  311.68   99.44
  -4   3  17  369.46  317.76
   4  -3 -17  285.33  296.88
  -2  -2 -16 5492.53  404.90
   2   2  16 5675.00  444.48
   2  -2  16 4911.02  340.96
 -10  -5   5 1087.37  258.15
  10   5  -5 1779.73  186.74
  10  -5  -5 1047.03  445.20
  -9   5  10 1900.22  244.43
   9   5 -10 1787.85  186.84
  -9  -5  10 1819.57  196.03
  -2   0  18  167.82  107.94
   2   0 -18  277.64  227.38
  -9  -6   5 2389.94  443.31
  -9   6   5 2395.90  404.65
   9   6  -5 2456.21  320.58
 -11  -2  10 2395.10  309.10
  11  -2 -10 2357.65  510.19
  11   2 -10 3194.82  660.20
  -5  -6  13 8904.81  720.02
   5  -6 -13 9104.62  544.84
  -5   6  13 8813.91  592.24
  -9  -6   2  156.66  150.82
   9   6  -2   95.33   80.62
   9  -6  -2  112.58  249.14
  -8  -5  12 1698.96  131.10
  -8   5  12 1522.62  216.92
  -8  -5  12 1752.19  414.12
  -8  -1  16   64.71  140.29
   8  -1 -16   39.44   77.49
  -8   1  16   52.56  116.18
  -2   9   3 6094.97  785.01
   2   9  -3 6558.38  362.50
   2  -9  -3 5987.81  492.63
  -2  -9   3 6146.72  428.33
  -1   5  15 1569.40  466.78
   1  -5 -15 1610.16  292.82
  -6   2  17  462.16  390.87
  -6  -2  17  495.64  119.62
   6  -2 -17  506.57  349.91
  -9  -5  -3 3378.68  493.04
   9   5   3 4121.61  825.32
  -9   5  -3 3924.44  427.43
   9  -5   3 3707.96  537.45
  -1  -9  -3  350.90  346.38
  -1   9  -3  193.69  239.02
   1  -9   3  437.00  227.72
   1   9   3  148.15  128.56
  -3   1  18 6642.96  487.66
  -3  -1  18 4335.02  501.28
   3  -1 -18 5915.95  423.28
   9   0   8 1520.40  244.75
  -9   0  -8 1908.12  201.15
   5   4  12 3190.19  435.02
   5  -4  12 3116.06  389.73
  -5  -4 -12 3041.46  394.23
  10  -4   2 1135.83  410.31
  10   4   2 1401.20  292.62
 -10   4  -2 1632.79  147.18
 -10  -4  -2 1223.95  260.43
  -4  -8   8 3928.05  478.76
   4  -8  -8 4350.51  255.23
  -4   8   8 3517.48  471.03
  11  -1 -11 3067.80  401.66
  11   1 -11 3710.54  491.05
   2  -8  -9 4603.40  343.08
  -2   8   9 3144.53  689.57
  -2  -8   9 4258.21  527.52
   1  -8  -9 3960.13  503.77
  -1  -8   9 3894.20  484.16
  -1   8   9 3935.54  504.20
  -3  -4 -14 1129.85  209.93
   3   4  14 1156.73  443.44
   3  -4  14 1105.40  295.85
   1  -9  -4  305.75  253.14
  -1  -9   4  294.80  287.56
  -1   9   4  180.53  120.94
  10  -5  -2 2159.68  364.40
  10   5  -2 2208.35  255.44
 -10  -5   2 2085.58  204.43
  12   0  -510707.01  697.41
 -10   2  -5 3137.04  378.80
  10  -2   5 3630.08  567.12
  10   2   5 3053.40  438.59
 -10  -2  -5 3371.30  414.88
   4  -1 -18   29.32  105.56
  -4  -1  18   20.61  100.87
  -4   1  18   35.39  123.04
   6   7   5 3664.43  602.07
  -6  -7  -5 3412.93  432.21
   6  -7   5 4106.45  494.55
  -7   0  1721635.71  779.41
  -6   8   2 2434.32  329.38
   6  -8  -2 1960.30  256.38
  -6  -8   2 2224.32  470.29
   6   8  -2 2165.53  227.59
 -12   0   4   -6.38   44.59
  12   0  -4   80.82  149.92
  10   5  -6  400.70  339.70
  10  -5  -6 1025.39  285.41
 -10  -5   6 1093.60  466.49
  -9   1  15 1405.88  217.11
  -9  -1  15 1787.06  218.49
  10   4 -10 6720.15  452.33
 -10   4  10 7227.15  571.04
 -10  -4  10 7398.36  637.47
  -7  -2 -11 2415.17  340.02
  -7   2 -11 2092.72  218.04
   7  -2  11 2973.75  392.73
   7   2  11 1839.25  371.80
  -6  -8   3  463.09  344.82
   6   8  -3  214.64  192.54
  -6   8   3  237.01  307.24
   6  -8  -3  359.75  149.57
  -5   4  16   67.47  148.85
   5  -4 -16   61.84   71.76
   0  -9   4  866.28  188.74
   0  -9  -4  751.30  312.37
   0   9   4  719.66  303.30
  -4   8  -5 2847.07  375.62
  -4  -8  -5 3048.82  401.59
   4   8   5 2570.04  340.97
  -5   0 -1414295.36  932.43
   5   0  1414972.59  827.87
   1   1  17  974.20  261.41
  -1  -1 -17 1118.16  253.10
  -1   1 -17 1224.70  601.83
   1  -1  17 1042.90  207.81
  -2  -9  -2   40.06   82.61
   2  -9   2   43.99   79.88
  -2   9  -2    5.76   68.88
   2   9   2  -25.67  118.34
   4   5  12 5927.75  921.60
   4  -5  12 6128.80  417.19
  -4  -5 -12 5821.84  619.37
   2  -1 -18 2006.22  226.00
  -2   1  18 2348.08  334.31
  -2  -1  18 2371.26  337.97
  -1  -7 -11 3598.49  614.20
   1   7  11 3961.31  573.88
  -4   0 -15   42.82  146.23
   4   0  15   20.62  163.49
 -10  -3  -4 7030.96  775.96
  10   3   4 6995.11  778.40
  10  -3   4 7166.37  785.12
 -10   3  -4 6660.74  751.68
  -9  -6   6   69.81  112.69
   9   6  -6   53.21  112.67
  -9   6   6  342.76  550.98
  -5   8  -3 9133.93  998.13
   5   8   3 8811.15  916.80
  -5  -8  -3 8256.89 1058.85
  -7  -7   8 1602.28  335.22
  -7   7   8 1333.37  431.28
  12   0  -6   95.73  206.59
   4  -3  14   12.60   59.31
   4   3  14   86.29  130.17
  -4  -3 -14   57.63  113.73
   9  -6  -1  156.88  234.14
  -9  -6   1  137.29  212.23
   9   6  -1  273.99  298.85
   8   0  10 1573.83  234.86
  -8   0 -10 1634.07  191.91
 -11  -3   0   51.70   55.07
  11   3   0  121.85  150.39
  11  -3   0   48.98   92.41
  -6  -8   1  985.50  227.01
   6   8  -1  617.03  173.42
  -6   8   1  510.06  392.15
  -9  -1  -8 3655.23  790.28
   9  -1   8 4303.75  530.41
  -9   1  -8 3739.61  465.23
   9   1   8 3689.15  510.08
  -5   8   7 4555.75  553.67
   5  -8  -7 4209.06  451.41
  -5  -8   7 3896.25  489.01
  -8  -3  15   39.35  166.38
   8  -3 -15   64.77   81.42
  -8   3  15   99.25  128.49
  -5   3 -1311154.27 1182.68
  -5  -3 -13 9993.95 1053.98
   5   3  1311022.62 1192.78
   5  -3  13 9969.08 1064.90
 -10   2  13 2111.52  423.69
  12   0  -310198.84 1356.04
 -12   0   310852.65 1080.62
   7   5   8 5651.22  807.09
   7  -5   8 5289.36  594.87
  -7  -5  -8 4926.01  576.57
   8  -5   6 6172.19  664.98
  -8  -5  -6 5542.13  705.76
   8   5   6 5252.32  811.10
   6   8  -4 2378.61  395.96
  -6  -8   4 1983.41  460.20
   6  -8  -4 2093.81  357.64
  -6   8   4 2212.08  728.05
   3  -5  13 3552.65  393.94
   3   5  13 4127.33  525.57
  -3  -5 -13 3438.23  519.02
   1  -3 -17 2269.73  388.17
  -1   3  17 2548.14  484.31
  -1  -3  17 2372.60  377.79
   5  -7   7 2117.45  344.38
  -5  -7  -7 2227.30  445.31
   5   7   7 2318.22  487.59
  -5   0  18   36.18   86.67
   7   6   6 5525.52  704.23
   7  -6   6 4754.96  565.24
  -7  -6  -6 4301.10  661.80
  -2   9   4 1051.84  305.24
  -2  -9   4 1348.82  220.25
   2  -9  -4 1385.82  263.30
   2  -7 -12 2295.00  385.07
  -2   7  12 2731.71  501.63
  12   1  -5 2768.87  501.50
  12  -1  -5 2157.13  442.05
 -12  -1   5 2790.47  437.08
 -10   3  12  881.69  232.64
 -10  -3  12  885.03  321.05
  10   3 -12 1026.55  163.80
   3  -8  -9 1574.36  234.39
  -3   8   9 2154.19  398.87
  -3  -8   9 1421.28  225.82
  -7  -1  17   78.32  154.12
   7  -1 -17  148.75  137.65
  -7   1  17  133.06  153.56
   1   6  13 4474.35  676.64
  -1  -6 -13 4481.59  659.19
  -3  -9   1   83.62  150.24
   3   9  -1   44.26   60.11
   3  -9  -1  167.18  131.21
  -3   9   1   36.88   50.48
  12   1  -4 4094.70  513.47
 -12  -1   4 3642.47  399.34
  12  -1  -4 4109.88  509.96
  -5  -5 -11 1666.25  265.16
   5  -5  11 1845.08  321.29
   5   5  11 1273.89  472.79
  -5  -7  11 1333.84  238.64
  -5   7  11 1409.80  398.61
   5  -7 -11 1411.16  163.70
   5  -1  14 1451.26  306.19
  -5   1 -14 1708.15  538.43
   5   1  14 1793.26  488.18
  -5  -1 -14 1714.04  605.77
   0   8   9 1789.07  777.67
   0  -8  -9 1459.37  432.98
 -11   0  -3  482.36  131.46
  11   0   3  410.66  207.38
   5  -3 -17   11.29   94.17
  -5  -3  17   10.42   60.26
  -5   3  17   45.23  115.07
 -10   0  -6 4566.91  536.00
  10   0   6 4668.57  689.91
  -6   7  10 2600.26  461.51
   6  -7 -10 2713.79  422.98
  -6  -7  10 2474.87  576.18
   3   9  -2 1585.06  148.09
  -3  -9   2 1786.73  345.91
  -3   9   2 1863.75  639.52
   3  -9  -2 1751.45  435.08
   1   0 -18 1149.29  291.35
  -1   0  18 1410.37  248.55
  10   5  -1  998.69  356.28
  10  -5  -1  719.40  222.37
 -10  -5   1 1079.46  332.30
  -8   4  1410645.22 1103.34
  -8  -4  1410917.96 1146.31
  -4   1 -15 2611.26  457.26
   4   1  15 2301.33  544.10
   4  -1  15 2887.87  480.70
  -4  -1 -15 3000.25  503.18
  -7  -4  15 3708.37  404.43
  -7   4  15 3041.88  279.05
   7  -4 -15 3212.32  367.30
  12   0  -7 4462.86  540.11
  12  -1  -6 3442.12  445.34
  12   1  -6 2610.32  473.14
 -12  -1   6 2816.65  442.26
 -11   2  -2 6047.11  613.55
  11  -2   2 6205.84  692.59
  11   2   2 5737.82  671.35
 -11  -2  -2 6892.19  759.66
 -11  -3   9  211.95  222.43
  11   3  -9  236.66  334.19
  11  -3  -9  263.93  184.73
  -7   3  1616624.87  607.67
   7  -3 -1613334.53 1354.73
  -7  -3  1618388.48  473.52
   6   0  13  477.02  517.45
  -6   0 -13  392.01  367.95
   3  -9   0  137.98  214.36
   3   9   0  179.82  190.16
  -8  -1 -10 4861.27  562.06
  -8   1 -10 4620.53  631.44
   8   1  10 5119.48  634.56
   8  -1  10 4930.99  587.17
   6   4  11 4689.41  574.90
   6  -4  11 5125.02  711.56
  -6  -4 -11 5641.15  663.61
  -2   6  14 1069.18  324.90
   2  -6 -14 1186.04  234.56
  -3   7  12 4359.11  554.51
   3  -7 -12 4971.50  545.19
 -10   5   7 2996.65  511.18
  10   5  -7 2907.20  465.84
 -10  -5   7 2336.43  426.54
  -6  -8   0 2410.46  420.47
   6   8   0 2720.75  471.50
  -6   8   0 2519.15  429.71
   8   7  -3 3478.38  443.77
  -8   7   3 3431.65  431.35
  -8  -7   3 3731.14  470.35
   3   3  15 6461.02  725.71
   3  -3  15 6721.88  694.35
  -3  -3 -15 6908.92  747.29
   3  -6 -14 1736.85  314.46
  -3   6  14 1824.55  644.83
   5  -5 -15 1413.14  157.73
  -5   5  15 1454.92  222.71
  -8   6  10  528.87  183.66
  -8  -6  10  732.03  163.08
  -1  -9  -4  337.23  289.38
   1   9   4  232.54  321.45
   1  -9   4  336.59  443.46
   1  -7 -12 4663.10  562.10
  -1   7  12 4774.15  594.39
   0   4  16 9332.89  999.96
   0  -4  16 9889.29  975.09
   0  -4 -1610107.55 1034.52
 -12  -1   3  684.21  185.31
  12   1  -3 1043.11  243.48
  12  -1  -3  754.12  329.57
   6  -6   8 8566.79  923.40
   6   6   8 8184.62  891.85
  -6  -6  -8 8299.50 1129.31
  -8   7   4 1134.01  192.00
   8   7  -4 1363.38  240.50
  -8  -7   4 1357.64  225.93
   5  -1 -18 4764.14  529.38
  -5   1  18 4707.00  574.77
  -5  -1  18 4550.06  523.70
  -3   0 -16 9750.48 1006.66
   3   0  16 9043.32  943.80
   7  -7   3 3287.25  613.33
   7   7   3 4359.06  733.58
  -7  -7  -3 4379.73  521.12
  -8   7   2 1771.70  511.47
  -8  -7   2 1330.68  184.84
   8   7  -2 1957.90  593.97
   6  -8  -5  854.96  180.29
  -6  -8   5  924.63  308.15
   6   8  -5  612.87  177.95
  -6   8   5  741.86  231.29
  -3   9   3  462.16  415.56
   3  -9  -3  655.21  143.20
  -3  -9   3  667.76  201.83
   3   9  -3  528.58  232.45
 -12   0   2  334.41  160.07
  12   0  -2  318.08  440.17
   9   6  -7 4703.40  562.50
  -9   6   7 4533.14  753.95
  -9  -6   7 4155.63  531.67
  -9  -3  14 9984.73 1025.19
  -9   3  14 9845.40 1150.40
 -10   0  14  471.60  552.20
  -2   9  -312520.77 1228.14
   2  -9   314375.20  510.28
  -2  -9  -315240.71  571.00
   2   9   312578.02 1412.59
   0   5  15 5692.02  679.41
   0  -5 -15 6312.34  694.31
   9  -6   0   72.23  167.60
  -9  -6   0  118.60  156.62
   9   6   0   56.30   84.15
  -6  -3 -12  167.10  189.32
  -6   3 -12  180.86  300.39
   6  -3  12   74.92  115.95
   6   3  12   25.20   87.63
   2  -4  15 8960.63  918.39
  -2  -4 -15 8929.89  919.51
   2   4  15 9994.88 1085.92
  11   1   3 7200.79  957.67
  11  -1   3 6796.46 1079.62
 -11   1  -3 7293.73  740.15
 -11  -1  -3 7657.09  804.90
  -1  -9   5 1677.18  284.31
  -1   9   5 1838.06  449.22
   1  -9  -5 1536.00  217.86
  10  -1   6 2132.10  485.44
 -10   1  -6 2180.60  371.28
 -10  -1  -6 2406.34  415.99
  10   1   6 1788.71  404.38
   1  -1 -18 4029.35  555.50
  -1  -1  18 4341.36  504.30
  -1   1  18 3922.22  490.24
  11  -4  -4 6898.64  762.81
  11   4  -4 6142.44  699.10
 -11  -4   4 7816.40  864.11
  -3  -9  -1   54.31  130.26
  -3   9  -1   82.67  107.36
   3  -9   1    1.93  107.58
  12  -1  -7 3885.02  867.17
 -12  -1   7 4088.58  439.50
  12   1  -7 3283.35  424.92
   6   1  13  476.60  472.10
  -6   1 -13  529.65  158.95
  -6  -1 -13  791.20  367.80
   6  -1  13  835.01  186.53
   9  -3   7 6576.98  715.56
  -9  -3  -7 6407.44  692.40
  -9   3  -7 5863.78  290.68
   9   3   7 6655.54  786.82
   8  -2 -16 9290.89  922.16
  -8  -2  16 9833.87 1003.90
  -8   2  16 9804.04 1012.85
  11  -4  -5  990.02  819.58
 -11  -4   5 1046.68  303.79
  11   4  -5  850.73  222.61
   8  -3   9 8192.80 1106.13
  -8   3  -9 8962.22 1008.24
   8   3   9 8974.65  972.12
  -8  -3  -9 9065.80 1003.91
  -2  -8  -8 1521.89  514.25
   2   8   8 1687.93  364.52
  -3   2  18 1002.53  232.71
   3  -2 -18 1373.14  174.94
  -3  -2  18 1354.01  166.72
   8   7  -5 3703.95  469.58
  -8  -7   5 3878.21  575.74
  -8   7   5 3876.51  478.36
  -3  -8  -7 5504.31  630.05
   3   8   7 6658.54  794.75
  -1   6  14 3126.77  506.33
   1  -6 -14 3668.68  437.68
   0   9   5 5429.07  616.42
   0  -9   5 6197.81  669.83
   0  -9  -5 5959.94  655.16
  11   0 -12  999.29  731.52
   2   5  14 3404.60  734.92
  -2  -5 -14 3207.23  465.61
  11   2 -11 2462.83  421.59
  11  -2 -11 2437.77  905.82
 -11  -2  11 2428.49  448.77
  -8  -6  -4 7031.94  759.76
   8  -6   4 6739.68  726.10
   8   6   4 6010.74  707.94
  11  -4  -3 1076.04  252.10
 -11  -4   3 1269.07  163.10
  11   4  -3 1400.76  201.80
   3   1  16 1778.76  340.36
   3  -1  16 1260.96  357.02
  -3  -1 -16 1358.21  217.49
  -3   1 -16 1690.64  341.98
  -8   7   1 1777.71  334.69
   8   7  -1 2071.67  373.62
  -8  -7   1 1809.07  433.97
  12   0  -8  313.26  258.13
 -12  -1   2 3551.84  426.86
  12  -1  -2 3090.17  678.58
  12   1  -2 3411.60  507.96
  -8   4  -8 2440.91  400.01
   8  -4   8 2178.82  405.53
   8   4   8 2466.36  473.33
  -8  -4  -8 2570.75  791.77
  -2  -9   5 3617.78  456.40
  -2   9   5 2497.47  762.40
   2  -9  -5 3586.67  433.98
  -4   6  14  540.66  444.55
   4  -6 -14  565.80  140.61
  -4  -2  1811937.90 1199.93
  -4   2  18 9599.84 1022.25
   4  -2 -1811275.34 1258.09
 -10  -1  14  584.47  372.30
 -10   1  14  480.26  171.49
  -9  -2  15 2441.46  401.82
  -9   2  15 3232.28  417.00
   9   5 -11 1891.80  360.23
  -9  -5  11 2699.22  605.52
  -9   5  11 2333.45  428.35
 -11  -4   6 6192.96  683.62
  11   4  -6 5588.28  642.34
  11  -4  -6 5834.33  381.21
  -6  -8  -1 1362.37  279.19
   6   8   1 1228.56  210.66
  -6   8  -1 1202.49  186.75
 -11  -3  -1  235.28  165.82
  11  -3   1  206.97  267.53
 -11   3  -1  325.57  146.10
  11   3   1  315.89  275.94
  10  -5   0 2729.30  569.09
  10   5   0 3142.69  409.33
 -10  -5   0 2750.83  504.83
  -1  -2 -17 1520.47  634.74
   1  -2  17 1650.25  209.68
   1   2  17 1492.15  284.30
 -10   4  -3 2781.75  475.87
  10  -4   3 2659.81  651.80
 -10  -4  -3 2761.98  474.28
  10   4   3 2706.64  759.40
  -2  -2  1811789.36 1169.03
  -2   2  1810309.10 1112.10
   2  -2 -1810592.50 1108.32
   3  -9  -4 1634.62  193.52
  -3  -9   4 1550.08  218.13
  -3   9   4 1736.25  376.96
  -4  -7  12 1836.91  425.46
  -4   7  12 1360.43  415.55
   4  -7 -12 1818.45  314.39
   6  -5  10 7137.78  784.90
   6   5  10 5931.05  774.36
  -6  -5 -10 6771.08  976.82
   5   8   4  711.26  153.08
  -5  -8  -4  807.78  576.43
  -5   8  -4  617.63  190.00
  -9   5  -4 3647.83  407.59
  -9  -5  -4 3340.86  489.35
   9   5   4 3459.07  942.96
   9  -5   4 3542.50  635.29
   6  -6 -13  949.49  178.38
  -6  -6  13  984.54  318.27
  -6   6  13 1119.50  485.23
  -7   6  12  289.49  280.83
  -7  -6  12  394.62  482.28
  -4   8   9 6092.90  867.73
   4  -8  -9 7995.87  839.15
  -4  -8   9 6297.75  687.62
  -9   4  13 2623.44  680.78
  -9  -4  13 3101.45  421.21
  -9  -4  13 2937.03  503.80
 -10   5   8  926.97  244.56
  10   5  -8  888.23  288.84
 -10  -5   8 1152.61  273.05
   9  -2   8 3797.95  597.39
  -9   2  -8 4099.73  553.08
  -9  -2  -8 3987.40  556.35
   9   2   8 4404.50  583.69
  -7  -7   9 5008.09  797.46
  -7   7   9 4384.71  553.49
  -5   8   8 6043.39  676.37
  -5  -8   8 6877.68  772.75
   5  -8  -8 5763.66  708.66
   6  -4 -16 9418.78  966.60
  -6   4  1611617.59 1206.62
   0  -7 -12 6674.98  746.71
   0   7  12 6498.60  935.01
  11   1 -12 3361.52  457.02
   3   7  10 3985.53  713.25
  -3  -7 -10 2954.93  592.67
  -6  -8   6 2271.86  408.36
  -6   8   6 2698.43  641.94
   6  -8  -6 2195.94  346.19
 -12   0   1 9134.83  911.20
  12   0  -1 9162.17  971.03
 -10  -4  11 2640.51  549.98
  10   4 -11 1685.71  292.81
 -10   4  11 1857.98  380.30
  -1  -8  -9 5269.29  604.80
   1   8   9 5894.38  816.49
  -7   5  14 3611.08  470.11
  11  -4  -2 9888.21 1033.19
 -11  -4   2 9753.60 1097.16
  11   4  -2 8706.94 1030.11
  -3  -9  -2   96.18  100.43
   3   9   2   10.95  122.51
  -3   9  -2   89.42  111.79
   3  -9   2   54.47  121.09
   0  -3  17  278.58  266.58
   0   3  17  433.50  422.39
   0  -3 -17  336.81  339.65
   9   4   6 3363.70  457.51
  -9  -4  -6 2881.54  513.80
   9  -4   6 2839.04  477.63
  -9   4  -6 2885.49  479.51
   8   7  -6 3234.01  374.03
  -8  -7   6 3073.22  453.33
  -8   7   6 2821.01  588.05
  -6   0  18  602.48  189.30
  12   1  -8 1984.15  593.84
  12  -1  -8 3026.52  507.64
 -12  -2   5 2303.61  382.62
  12   2  -5 2177.04  415.34
  12  -2  -5 2141.04  535.03
   4   6  11  240.14  272.81
   4  -6  11  405.78  167.92
  -4  -6 -11  239.87  288.32
  -7   2  17 3359.91  437.61
   7  -2 -17 3488.48  393.31
  -7  -2  17 3582.34  418.01
  -7   0 -12 7847.77  978.81
   7   0  12 7925.71  849.14
  12  -2  -4 1806.98  539.42
 -12  -2   4 1264.46  233.83
  12   2  -4 1885.24  417.92
  -4  -8  -6 1429.94  211.41
   4   8   6 1553.53  337.66
  -4   8  -6 1441.70  183.87
  -5  -2 -14 2708.75  484.31
   5   2  14 3141.11  424.40
  -5   2 -14 3393.29  434.50
   5  -2  14 2612.17  437.83
   4   7   9 2187.45  396.43
   4  -7   9 1901.93  407.11
  -4  -7  -9 2550.22  447.24
   9   6  -8   60.44   66.32
  -9  -6   8   44.89   71.55
  -9   6   8   87.49  119.81
  -3  -6 -12 8415.99 1122.84
   3   6  12 9515.90 1218.54
   2  -3  16  184.61  148.77
  -2  -3 -16  271.81  293.08
   2   3  16  284.32  282.49
  11   3 -10 9506.05 1132.96
 -11  -3  1011293.18 1146.59
  11   4  -7  742.07  274.34
  11  -4  -7  696.03  775.24
 -11  -4   7  574.17  228.98
   4  -2  15 3895.39  565.57
   4   2  15 4881.32  593.60
  -4  -2 -15 4750.12  587.34
  -4   2 -15 4578.59  547.19
   8   7   0 1793.06  412.37
   8  -7   0 1904.66  379.85
  -8  -7   0 1703.85  397.75
   9  -6   1  214.16  219.41
  -9  -6  -1   83.74  118.03
   9   6   1   58.32  158.86
   1   9   5 1766.23  340.57
   1  -9   5 1742.67  330.01
  -1  -9  -5 1388.78  435.09
   6  -7   6 2457.02  407.58
  -6  -7  -6 2732.31  710.28
   6   7   6 3440.27  805.65
  12  -2  -6 1870.03  737.74
  12   2  -6 1470.85  242.45
 -12  -2   6 2166.23  384.05
   2   9   4  183.44  153.08
   2  -9   4  228.45  161.24
  -2  -9  -4  370.42  348.69
  -8  -2 -10  920.22  376.19
   8  -2  10  780.17  335.22
  -8   2 -10  945.85  444.90
   8   2  10  831.08  253.84
  -6   3  17  114.98  198.11
   6  -3 -17  135.41  151.52
  -6  -3  17  118.89  159.37
  -8   5  13 9452.99 1105.26
  -8  -5  13 9815.54 1074.06
   0   0 -18  161.21  147.79
   0   0  18  121.83  129.81
  -2  -7 -11 2701.84  459.51
   2   7  11 2168.06  435.19
  -2  -8  10 3197.16  487.31
  -2   8  10 4106.73  533.08
   2  -8 -10 2945.80  481.50
  12   2  -3 1496.28  598.02
  12  -2  -3 1487.41  367.19
 -12  -2   3 1353.11  203.74
  12   1  -1  195.33  234.55
 -12   1   1  168.31  168.18
  12  -1  -1   75.53  166.50
 -12  -1   1   23.79  113.77
  -7   4 -10 3811.33  588.77
   7  -4  10 4355.12  590.80
   7   4  10 3470.72  497.23
  -7  -4 -10 4507.98  558.04
  -2   0 -17  579.16  412.35
   2   0  17  648.88  166.87
  -5   2  18  242.62  229.11
  -5  -2  18  270.00  313.33
   5  -2 -18  376.00  368.96
   6  -1 -18  462.35  287.08
  -6  -1  18  473.58  425.80
  -6   1  18  508.83  202.42
  -1  -8  10 6815.62  743.02
   1  -8 -10 6947.78  763.79
  -1   8  10 7005.74 1103.94
 -10  -3  -5 3487.00  422.69
  10   3   5 3823.56  507.98
  10  -3   5 3687.91  514.94
 -10   3  -5 3670.15  465.07
  -7  -1 -12 1142.34  203.62
   7   1  12 1444.53  574.91
   7  -1  12 1285.19  203.49
  -7   1 -12 1696.93  325.84
  -1   9   6  184.45  161.01
  -1  -9   6  195.32  229.19
   1  -9  -6  232.82  155.28
  12   0  -9 2472.12  636.52
   0   6  14  173.34  172.51
   0  -6 -14  456.91  204.91
   3  -9  -5 1986.30  364.22
  -3   9   5 1836.55  591.83
  -3  -9   5 2118.64  472.95
   7   3  1113780.87  842.49
  -7   3 -1114331.53  508.14
   7  -3  1112678.94 1350.05
  -7  -3 -1112449.78 1315.02
  11  -2   3 2553.01  456.44
 -11   2  -3 3272.33  390.43
 -11  -2  -3 2486.14  410.20
  11   2   3 3356.73  522.52
   5  -6  10 8036.95  836.28
   5   6  10 7887.64  864.28
  -5  -6 -10 7646.39  817.36
 -10  -2  -6 3373.09  416.54
  10  -2   6 3061.23  480.03
 -10   2  -6 3152.39  401.23
  10   2   6 3194.88  801.62
  -4  -9   2 2777.74  472.80
   4  -9  -2 2951.13  508.41
  -4   9   2 3234.22  539.12
   4   9  -2 3095.16  462.56
   1  -2 -18 1202.58  364.87
  -1  -2  18 1330.34  170.95
  -1   2  18 1069.38  219.26
  -4  -9   110569.12 1178.08
  -4   9   111309.36 1153.08
   4  -9  -111350.60 1128.79
   4   9  -111733.62 1201.34
   6   8   2 1498.14  315.26
  -6  -8  -2 1331.53  220.69
  -6   8  -2 1794.02  325.83
  -7  -7  -4 8083.28  855.50
   7   7   4 8290.26  889.98
   7  -7   4 7345.48  845.60
  -6   5  15 5213.45  636.04
   6  -5 -15 5668.98  602.46
  11  -4  -1 2345.33  444.42
  11   4  -1 1770.58  406.18
 -11  -4   1 2020.30  365.09
  12   2  -7 1998.82  667.55
  12  -2  -7 1702.71  359.52
 -12  -2   7 1652.24  216.25
   6   2  13 5863.75  383.05
   6  -2  13 5244.86  734.11
  -6   2 -13 6065.59  796.73
  -6  -2 -13 6024.23  681.34
   3  -4 -17 3013.26  510.64
  -3   4  17 1833.74  719.99
  11   0   4 1600.72  395.39
 -11   0  -4 1668.73  172.28
   0   1 -18 4355.31  526.46
   0   1  18 4541.40  554.16
   0  -1 -18 4911.58  575.47
   0  -1  18 5686.61  639.23
   3  -8 -10 3774.91  469.65
  -3  -8  10 3931.28  639.70
  -3   8  10 3781.95  696.13
  -2   9   6 1708.31  739.34
   2  -9  -6 1508.48  187.60
  -2  -9   6 1760.13  333.35
  10   5   1  932.27  300.26
 -10  -5  -1 1168.57  188.95
  10  -5   1  857.88  773.16
  -5   6  14 1098.64  306.70
   5  -6 -14  875.74  134.88
   0  -9   6 1022.58  257.75
   0   9   6  825.88  189.93
   0  -9  -6  976.05  418.67
  -8  -6  11 5066.07  583.67
  -8   6  11 4693.22  810.74
   8   7  -7 3732.35  459.17
  -8  -7   7 3525.22  686.07
  -8   7   7 3492.54  446.25
 -10   3  13  359.60  468.28
  10   3 -13  431.65  134.57
 -10  -3  13  382.90  137.37
  -9   0  16  651.04  235.15
  -6   7  11 5462.15  712.00
   6  -7 -11 4971.53  521.85
  -6  -7  11 3781.61  462.17
   4  -9  -3 8870.17  898.08
  -4   9   310480.77 1103.64
  -4  -9   3 8871.44  926.53
   2   6  13  272.13  215.35
  -2  -6 -13  511.87  442.60
  -2   1 -17 2455.14  482.88
  -2  -1 -17 2966.33  673.22
   2   1  17 2478.53  434.87
   2  -1  17 2970.07  569.02
  -1  -4 -16 1511.13  355.13
   1   4  16 1215.94  508.86
   1  -4  16 1302.34  256.07
  -8   0  17   68.94  114.53
  -3   2 -16  817.01  330.65
  -3  -2 -16  627.45  248.91
   3   2  16  778.47  244.99
   3  -2  16  816.08  355.26
  -4   9   0 3025.13  318.23
  -4  -9   0 4018.86  561.50
   4   9   0 3266.01  437.99
   4  -9   0 4124.80  539.58
  -3   9  -3  877.20  121.21
  -3  -9  -3 1445.79  237.08
   3  -9   3 1168.96  189.32
   3   9   3 1082.42  290.63
  -3   5  16 2622.60  823.51
   3  -5 -16 3458.98  408.50
  12  -2  -2 1235.41  289.27
 -12  -2   2  947.72  348.86
  12   2  -2 1242.04  590.03
   2  -4 -17 1577.78  204.58
  -2   4  17 1703.10  732.77
   1   5  15 4384.99  602.17
  -1  -5 -15 3659.78  455.27
  -6   8   7 1545.17  311.14
   6  -8  -7 2085.55  331.75
  -6  -8   7 1719.60  375.13
 -10   2  14 8453.92  927.09
 -10  -2  14 7435.58  771.10
 -10   5   9 6964.10  796.32
  10   5  -9 5498.64  694.12
 -10  -5   9 5185.27  580.77
  12   1  -9 4744.84  558.15
  12  -1  -9 5262.03  630.50
   5   7   8 6501.64  715.03
  -5  -7  -8 6210.16  762.18
   5  -7   8 6322.40  694.27
   7  -6   7  118.13  114.37
  -7  -6  -7  178.02  281.78
   7   6   7  136.53  409.98
  11   4  -8 6488.86  743.32
  11  -4  -8 6053.63  869.90
 -11  -4   8 7200.93  785.72
 -12   0   0 1104.59  124.76
  12   0   0 1281.00  256.50
   8  -5   7 1627.79  286.39
  -8   5  -7 1909.22  333.56
   8   5   7 2051.77  889.39
  -8  -5  -7 1834.96  374.81
  -4   4  17  345.56  206.32
   4  -4 -17  324.98  331.86
  -9   0  -9  485.07  447.30
   9   0   9  432.89  202.86
  -2   5  16 2360.23  460.95
   2  -5 -16 2583.73  441.08
   8  -7   1 1385.23  254.36
   8   7   1 1316.80  501.34
  -8  -7  -1 1131.02  167.49
  11   3   2   81.17  214.80
  11  -3   2  111.36  145.63
 -11   3  -2   78.37   74.48
 -11  -3  -2   81.28   84.46
  -5   7  12 2527.25  463.23
  -5  -7  12 2959.93  551.02
   5  -7 -12 2893.96  514.82
   0   8  10 3422.45  768.89
   0  -8 -10 3296.50  400.47
 -11   1  -4 5682.78  625.88
  11  -1   4 5426.33  652.16
  11   1   4 5756.61  693.23
 -11  -1  -4 5868.61  361.93
 -11   2  12  941.18  220.79
  11   2 -12  922.41  255.86
 -11  -2  12  801.80  314.22
  -9   1  16 3569.07  457.34
  -9  -1  16 3434.30  408.03
   9  -1 -16 3635.31  497.97
   4  -9  -4 1941.65  354.26
  -4  -9   4 1878.43  530.94
  -4   9   4 2390.17  418.78
   8  -1 -1712155.72 1229.23
  -8   1  1711492.86 1177.43
  -8  -1  1710282.68 1038.53
   1   7  12 2552.88  542.15
  -1  -7 -12 2693.35  463.09
   4  -5 -16  392.66  365.78
  12   2  -8 2912.72  496.36
 -12  -2   8 3089.29  350.13
  12  -2  -8 2721.29  634.65
  -9   6   9 8778.62  943.28
   9   6  -9 8244.22  834.83
  -9  -6   9 7656.08 1006.74
  -5  -8  -5 6721.27  779.83
  -5   8  -5 7849.36  793.63
   5   8   5 8502.68  897.89
  -8  -6  -5 1177.35  368.43
   8  -6   5 1408.05  197.50
   8   6   5 1113.54  343.65
  -7  -5  -9  990.73  198.67
   7  -5   9 1034.17  184.14
   7   5   9  935.34  196.15
 -10   0  -7 1945.06  343.27
  10   0   7 1849.93  600.51
  -4  -9  -111781.65 1199.58
   4   9   1 9793.53 1151.02
  -4   9  -111217.08 1220.75
   4  -9   111146.98 1140.82
 -12  -1   0 3563.53  442.57
 -12   1   0 3567.74  387.40
  12   1   0 3452.97  497.29
  12  -1   0 3436.78  577.56
  -9  -6  -2  180.00  192.26
   9   6   2  218.64  183.93
  -9   6  -2  218.02   79.34
   9  -6   2  268.44  430.13
  -9   1  -9 2113.88  376.89
   9   1   9 1926.06  453.04
   9  -1   9 2303.13  428.99
  -9  -1  -9 2051.04  599.73
 -11   0  13 9595.41 1092.38
   5  -8  -9 1273.60  140.24
  -5  -8   9 1115.64  404.73
  -5   8   9 1291.92  248.85
  -7  -7  10 2816.97  532.72
  -7   7  10 2198.56  534.36
 -10  -4  -4 1322.13  217.58
  10   4   4 1494.83  481.82
  10  -4   4 1387.13  257.08
 -10   4  -4 1239.43  138.98
  -2  -9  -5 9030.54  933.98
   2  -9   5 9264.87  978.85
   2   9   5 9984.99 1044.08
   3   8   8  308.61  422.64
  -3  -8  -8  713.44  220.36
   4   4  14 1030.96  518.70
  -4  -4 -14 1020.08  436.94
   4  -4  14  993.83  267.73
  -8   3  16  691.86  169.04
  -8  -3  16  547.40  114.76
   2  -7 -13 5901.15  711.96
  -2   7  13 4128.86  538.55
  -3  -9   6 1141.80  330.42
  -3   9   6 1295.75  290.23
   3  -9  -6 1447.74  191.99
 -11  -4   0 8462.80  969.84
  11  -4   0 9105.56  962.95
  11   4   0 8661.14  923.90
  -3   3  18 9759.22 1063.94
   3  -3 -18 9673.62 1002.28
  -9   5  12 2454.44  459.29
  -9  -5  12 2383.00  426.20
  -8   4  15  431.37  181.81
  -8  -4  15  389.82  215.68
   5  -4  13 1208.28  192.63
  -5  -4 -13 1108.17  827.68
   5   4  13 1429.94  416.33
   2   8   9 4604.58  469.27
  -2  -8  -9 5058.62  463.73
   1   9   6 1090.67  384.04
   1  -9   6  902.88  357.14
  -1  -9  -6 1076.79  447.93
  12   0 -10  117.46  128.27
 -11   3  11  497.43  578.24
  11   3 -11  539.93  368.61
 -11  -3  11  238.18  214.42
  -7  -8   3 3761.93  810.37
  -7   8   3 3850.57  723.43
   7   8  -3 3819.70  537.51
 -12  -2   1 1798.55  173.62
  12   2  -1 1822.92  328.42
  12  -2  -1 1623.44  266.28
  -6  -6  -9  101.11  186.94
   6  -6   9  121.17  117.90
   6   6   9   52.93  170.50
  -1   4  17 3737.56  589.80
   1  -4 -17 3404.95  509.08
  -3   7  13 1146.28  282.78
   3  -7 -13 1018.18  349.69
   9  -5   5 2276.12  378.70
   9   5   5 1883.47  449.01
  -9  -5  -5 2524.51  414.71
  -9   5  -5 2685.89  393.84
   1  -5 -16 1943.82  264.19
  -1   5  16 2854.98  477.41
   7   8  -2 4248.47  421.43
  -7   8   2 3352.79  519.70
  -7  -8   2 3206.34  595.38
  -6  -2  18 9696.66  770.48
  -6   2  18 9423.83  738.31
   6  -2 -18 9423.98  759.47
   4  -8 -10 4804.13  457.56
  -4  -8  10 4695.69  441.02
  -4   8  10 5271.29  513.83
 -10   0  15 1032.95  229.18
 -10   4  12 7543.82  972.52
  10   4 -12 7839.60  647.00
 -10  -4  12 7737.36  596.51
  -6  -8  -3 1253.12  541.25
  -6   8  -3 1200.41  276.93
   6   8   3 1309.18  378.31
 -10   1  -7  895.25  172.70
  10  -1   7 1239.99  603.18
 -10  -1  -7 1303.78  388.95
  10   1   7  863.12  372.60
  -4  -3  18  635.50  288.23
   4  -3 -18  406.33  353.15
  -7  -2 -12 1885.08  475.16
  -7   2 -12 2071.02  232.77
   7   2  12 2375.81  421.85
   7  -2  12 1759.38  370.72
  -8   0 -11  154.45  287.15
   8   0  11  115.86  191.37
  -4  -5 -13 1690.06  247.05
   4   5  13 1588.03  289.92
   4  -5  13 1912.58  238.62
  -9   3  15  670.40  642.71
  -9  -3  15  379.26  361.41
   3   0 -1917192.59  587.58
  -3   0  1916958.68 1320.26
  -8   7   8 2214.66  642.92
  -8  -7   8 2623.32  442.99
  -7   8   4 4778.22  480.21
  -7  -8   4 5719.06  483.94
   7   8  -4 5033.47  426.94
   1  -3  17 5308.71  399.97
   1   3  17 5041.33  675.81
  -1  -3 -17 5309.19  452.45
  -5   4  17 3178.97  517.57
   5  -4 -17 2518.87  391.81
  -7   0  18  425.64  422.96
 -11   1  13 2026.37  241.67
  11   1 -13 2357.47  476.12
  -2   3  18  302.27  403.28
   2  -3 -18  278.86  367.76
  -2  -3  18  275.77  266.33
  -1   7  13 1083.56  343.53
   1  -7 -13 1195.39  188.56
 -11   4   9 1198.68  240.50
 -11  -4   9 1207.42  391.74
  11   4  -9 1091.16  388.01
  -7   4  16 1266.69  342.19
   7  -4 -16  795.06  121.31
   4   0 -19   47.54   64.10
  -4   0  19   28.73   81.12
  -1  -9   7 1701.02  306.36
   1  -9  -7 1875.49  212.50
  -1   9   7 1665.62  579.18
   4  -9  -5 5361.07  515.83
  -4   9   5 6227.24  698.90
  -4  -9   5 5356.69  724.32
   3  -9   4  151.04  157.94
   3   9   4   74.15  125.56
  -3  -9  -4  138.76  183.90
  -9  -3  -8  111.77  235.39
  -9   3  -8  160.54  118.36
   9   3   8  155.45  244.59
   9  -3   8  155.30  198.69
   0   2  1810589.54  865.85
   0  -2  18 9095.22  641.37
   0  -2 -18 9655.78  721.77
   4   8   7 2767.22  639.37
  -4  -8  -7 3358.98  599.68
  -7   8   1 3461.29  516.50
   7   8  -1 3371.79  644.12
  -7  -8   1 3343.49  583.03
   5  -5  12 2513.94  380.69
  -5  -5 -12 2509.28  447.85
   5   5  12 3054.95  498.94
   3   4  15  865.29  697.34
  -3  -4 -15 1006.46  175.37
   3  -4  15 1017.79  151.45
  10  -5   2 1163.03  209.34
 -10  -5  -2 1185.23  356.07
  10   5   2 1115.21  326.39
  12   1 -10  670.08  454.79
  12  -1 -10  706.61  325.64
   4   9   2  954.39  380.07
  -4   9  -2  924.14  131.57
   4  -9   2 1173.84  235.60
  -4  -9  -2 1300.36  251.05
   1   6  14 7854.70  703.93
  -1  -6 -14 6234.28  511.49
  -2  -2 -17 4664.57  488.91
  -2   2 -17 4591.52  432.27
   2  -2  17 4479.21  389.18
   2   2  17 5119.94  471.65
  -2  -9   7 4279.52  401.30
  -2   9   7 4233.38  416.23
   2  -9  -7 4153.01  278.74
  -7  -6  13 6038.93  606.56
  -7   6  13 7028.37  596.31
   6  -8  -8 3589.71  496.57
  -6  -8   8 3544.15  812.77
  -6   8   8 3573.79  592.99
 -10  -1  15 8808.46  836.00
 -10   1  1511336.49  831.11
   3   5  14 1108.98  295.54
  -3  -5 -14 1620.60  229.53
   3  -5  14 1541.60  147.67
   8  -7   2 2294.63  521.51
   8   7   2 2497.11  405.18
  -8  -7  -2 2041.56  245.44
 -12  -3   5  167.23  198.30
  12   3  -5  132.81  227.14
  12  -3  -5  231.01  272.39
  12   0   1 6996.84  591.11
 -12   0  -1 6846.11  540.15
   3  -6 -1510929.50  758.07
  -3   6  15 6455.74  589.53
  -9  -4  14  570.45  118.89
  -9   4  14  795.01  607.82
   7  -3 -17  465.65  118.97
  -7   3  17  454.75  345.69
  -7  -3  17  437.96  280.99
  12   2  -9 1627.56  533.90
  12  -2  -9 1748.02  327.78
 -12  -2   9 2477.91  366.57
  -8   1 -11  158.57  185.90
   8  -1  11  187.87  188.17
   8   1  11  169.56  278.37
  -2   0  19  341.53  463.13
   2   0 -19  522.10  536.56
 -12  -3   411739.69  823.62
  12  -3  -410199.82 1251.00
  12   3  -410605.75  799.53
  -1   0 -18 4117.94  731.49
   1   0  18 4152.31  338.07
   2  -6 -15  422.96  135.45
  -2   6  15  418.08  362.11
  -3   1  19  357.18  424.23
  -3  -1  19  308.22  244.98
   3  -1 -19  218.52  153.74
  -7   8   5 2970.40  631.50
  -7  -8   5 3005.66  566.83
 -10  -5  10 1175.10  268.02
  10   5 -10 1145.60  192.92
 -10   5  10 1429.23  309.65
  -5   5  16 3008.96  614.84
   5  -5 -16 3021.05  479.75
   6  -4  12  950.30  390.11
   6   4  12  733.97  208.13
  -6  -4 -12 1013.08  561.26
  -5   3 -14 2384.95  764.59
   5  -3  14 2587.18  397.39
   5   3  14 2046.10  343.40
  -5  -3 -14 2576.20  441.91
  -7  -1  18 3230.57  489.64
  -7   1  18 2786.47  436.94
   7  -1 -18 3104.44  519.63
   1   8  10 3439.37  556.64
  -1  -8 -10 3289.06  497.41
   6   7   7 1638.97  378.74
  -6  -7  -7 1146.58  301.13
   6  -7   7 1235.25  190.38
  -5   0 -15 2267.41  465.51
   5   0  15 2107.88  239.12
   0   9   7 7617.20  621.46
   0  -9  -7 6314.28  542.62
   0  -9   7 6580.69  691.54
   4   3  15  339.28  301.97
   4  -3  15  208.83  246.27
  -4  -3 -15  329.60  425.04
   7  -7   5 3512.84  564.48
  -7  -7  -5 3000.89  506.84
   7   7   5 3285.59  568.86
 -12  -3   610376.48  781.56
  12   3  -610327.89  835.03
  12  -3  -610883.69 1081.43
  -4   7  13 6277.19  816.36
   4  -7 -13 7890.93  688.00
  -4   1  1913273.56  985.96
   4  -1 -1913817.47 1042.23
  -4  -1  1913188.52  969.57
   9   4   7 3277.08  755.81
   9  -4   7 4144.20  465.24
  -9  -4  -7 4460.67  427.79
  -9   4  -7 3561.77  584.23
   8  -4   9 5964.21  544.63
   8   4   9 5994.57  556.76
  -8  -4  -9 6543.77  543.39
  -8   4  -9 6178.37  520.11
  -8  -3 -10  768.67  176.78
   8   3  10  500.54  209.78
   8  -3  10  599.36  442.25
  -8   3 -10  599.63  207.79
 -11   2  -4 3321.08  478.76
  11  -2   4 4684.01  555.43
  11   2   4 3529.93  627.21
 -11  -2  -4 4484.10  394.75
   6  -6 -14   66.36   92.30
  -6   6  14   86.79  150.80
  -9   2  16  102.53   89.51
  -9  -2  16  264.85  251.06
  12  -3  -3  827.96  369.20
 -12  -3   3  874.00  241.04
  12   3  -3  718.69  263.31
   4   0  16  261.88  134.92
  -4   0 -16  417.98  521.83
   7   8   0 3179.31  469.96
  -7  -8   0 2488.07  411.10
  -7   8   0 3181.45  475.60
   5  -3 -18 9006.92  676.77
  -5   3  18 7543.42  610.59
  -8   2  17 1133.28  195.87
   8  -2 -17  851.49  110.66
  -8  -2  17 1077.20  141.46
  10  -6  -4  433.00  461.56
  10   6  -4  770.51  209.63
 -10  -6   4  594.92  191.37
  12  -1   1  119.80  231.65
 -12   1  -1  184.19  158.80
  12   1   1  188.39  213.32
 -12  -1  -1  181.76  271.98
  -5   0  1919630.88  640.21
   2  -8 -11 2691.41  406.40
  -2  -8  11 2399.08  399.12
  -2   8  11 2991.14  712.37
  -2  -1  1910036.95  885.44
   2  -1 -1910043.62  758.31
  -2   1  1910443.98 1034.52
 -12  -2   0 1128.57  150.12
  12  -2   0  807.38  857.47
  12   2   0  995.64  746.96
   1   1  18 2354.63  406.55
  -1   1 -18 2220.84  385.95
  -1  -1 -18 2193.01  376.89
   1  -1  18 2251.54  376.30
  10  -6  -3 6686.71  811.20
 -10  -6   3 7320.08  558.57
  10   6  -3 7619.56  624.50
  -3  -7 -11 2875.28  638.38
   3   7  11 2469.17  442.24
  11  -4   1 1955.67  261.85
  11   4   1 2012.59  574.36
 -11  -4  -1 2025.37  342.78
 -11   3  -3  898.51  136.17
  11   3   3  876.89  250.37
  11  -3   3  645.67  496.67
 -11  -3  -3  900.43  142.28
  -4   6  15  852.16  724.45
   4  -6 -15  943.59  145.12
   6   0  14 1026.20  223.01
  -6   0 -14 1052.84  331.37
   9  -2   9 2580.99  568.83
  -9   2  -9 2952.88  446.13
  -9  -2  -9 2427.15  391.25
   9   2   9 2856.49  476.91
  10   6  -5 7493.98  679.53
 -10  -6   5 7783.65  883.82
 -10   6   5 7299.01  615.91
 -10  -3  -6 4401.24  389.53
 -10   3  -6 4464.57  451.25
  10   3   6 4163.04  438.71
  10  -3   6 4390.52  518.25
  -9  -6  10   37.75   46.50
  -9   6  10   77.55  102.13
  -1  -3  1815159.97  972.57
  -1   3  1814075.62 1039.67
   1  -3 -1815231.26 1188.51
  -8   5  14  304.62  330.38
  -8  -5  14  154.41  252.34
   5  -1  15 1086.96  273.54
  -5  -1 -15 1222.28  358.04
  -5   1 -15 1526.42  249.23
   5   1  15 1650.31  292.67
  -4  -7 -10 5967.17  772.17
   4   7  10 4351.90  423.88
  -7   5  15  222.17  242.47
  -8  -6  12   79.96  120.45
  -8   6  12   78.30  153.25
  12   3  -7   60.04  104.54
 -12  -3   7   29.60   34.17
  12  -3  -7   62.24  197.97
   6   3  13 1952.97  380.68
   6  -3  13 1822.37  342.72
  -6  -3 -13 2090.65  292.27
  -6   3 -13 1557.52  278.30
  11   0   5  545.31  355.23
 -11   0  -5  656.46  187.12
  -3  -9   7 1671.30  480.94
  -3   9   7 1398.50  627.77
   3  -9  -7 1940.38  215.79
  -1   6  15 6475.14  584.21
   1  -6 -15 6917.40  690.25
  -6  -5 -11  777.11  448.97
   6  -5  11  710.08  152.01
   6   5  11  882.31  885.50
   9  -6   3  350.98  292.03
  -9   6  -3  355.22  200.17
  -9  -6  -3  297.81  385.65
  -1   8  11 2433.36  536.33
   1  -8 -11 1833.43  313.13
   5  -9  -2 1353.80  188.89
  -5   9   2 1459.97  536.00
   5   9  -2 1245.10  317.16
  -5  -9   2 1358.61  515.61
   0  -7 -13 1832.64  375.44
   0   7  13 2393.96  626.79
  -4  -9   6 3684.59  562.70
  -4   9   6 3378.31  532.32
   4  -9  -6 3397.08  547.15
  -7   8   6 8087.31  699.80
  -7  -8   6 8845.68  661.03
   0  -5 -16 2923.08  447.15
   0   5  16 3861.30  627.43
  -5   9   1  107.77  130.56
  -5  -9   1   12.11  134.90
   5   9  -1   53.37   87.18
   5  -9  -1   46.86   94.93
  -4   1 -16 7622.90  610.38
   4   1  16 6951.56  568.41
  -4  -1 -16 6560.03  537.21
   4  -1  16 6105.33  494.63
  -3   8  11 1723.49  277.00
   3  -8 -11 1539.17  183.45
  -3  -8  11 1673.14  239.06
  -6   7  12  906.95  339.68
  -6  -7  12  822.88  621.60
  -5  -9   3  183.84  342.60
   5  -9  -3  218.78  222.21
  -5   9   3  438.78  170.86
   0   4  17 3655.74  585.07
   0  -4 -17 3273.20  511.13
   2   9   6   -3.44  134.22
  -2  -9  -6   95.61  153.83
   2  -9   6   58.46   83.59
  -3  -3 -16 4385.08  432.86
   3  -3  16 4074.70  587.75
   3   3  16 4002.24  627.62
  12   0 -11 2994.68  467.00
  10   6  -2 2050.21  232.43
  10  -6  -2 1471.13  229.35
 -10  -6   2 1271.08  306.81
  12  -3  -210333.58 1036.24
 -12  -3   2 9997.48  797.96
  12   3  -2 9634.06  867.85
  -4   9  -310506.33  708.82
  -4  -9  -312767.52  920.17
   4   9   311547.61  830.74
  -5  -1  19   96.56  116.86
   5  -1 -19   41.20  100.14
 -10   2  -7 2305.81  374.69
  10   2   7 2188.59  474.69
  10  -2   7 3201.73  512.81
 -10  -2  -7 3030.83  466.81
 -10   3  14  697.40  250.14
 -10  -3  14 1221.20  269.08
  10   6  -6  268.54  315.89
 -10   6   6  300.41  522.12
 -10  -6   6  348.51  244.84
  -5   8  -6  602.68  104.40
   5   8   6  478.33  419.89
  -5  -8  -6  791.94  253.78
  -8   7   9 5282.20  470.67
  -8  -7   9 5644.37  534.22
  -2  -5 -15 4868.49  427.75
   2   5  15 5342.14  558.25
   6   1  14 9330.73  732.62
  -6  -1 -14 8795.05  705.73
   6  -1  14 8875.32  672.12
  -6   1 -1410827.34  803.92
  -2  -4 -16 3399.35  692.94
   2   4  16 3441.34  570.18
   2  -4  16 3547.23  531.19
  11   2 -13  714.29  168.57
 -11   2  13  761.25  348.66
  -6  -8  -4 2010.02  246.65
   6   8   4 2123.61  363.47
  -6   8  -4 2054.30  237.05
   4   6  12 3772.33  590.76
  -4  -6 -12 4463.83  469.01
 -11  -4  10 3096.97  474.33
  11   4 -10 2808.24  425.76
 -11   4  10 3099.83  527.18
   1   0 -19 8108.29  724.46
  -1   0  19 8408.18  693.93
  11  -5  -4  811.50  724.35
  11   5  -4  956.67  311.51
 -11  -5   4  847.37  382.12
 -11  -1  -5 4217.13  398.38
  11  -1   5 3808.65  738.73
 -11   1  -5 3296.07  471.56
  11   1   5 3307.68  641.62
   2   7  12 5924.59  906.35
  -2  -7 -12 6094.59  503.47
  -5   8  10 3146.66  512.81
   5  -8 -10 2992.56  423.39
  -5  -8  10 2746.18  477.35
 -11  -5   5 5157.77  465.15
  11   5  -5 4949.42  441.64
  11  -5  -5 5828.12  707.15
  -1  -9  -7 2385.50  493.52
   1   9   7 3387.03  528.87
   1  -9   7 2463.51  565.67
  -6   4  17   64.00  180.19
   6  -4 -17   -0.34   77.73
   5  -9   0   40.65   59.11
  -5   9   0   -8.40   73.51
   5   9   0   27.82  111.26
  -5  -9   0   18.78  141.04
  -7  -7  11 1540.98  290.01
  -7   7  11 1913.11  690.64
  -7   8  -1 5602.07  527.23
  -7  -8  -1 5210.41  753.16
   7   8   1 5598.13  607.86
  -3  -9  -5 2751.70  460.10
   3   9   5 2798.60  485.14
  -3   0 -17 6587.70  548.38
   3   0  17 6261.10  617.02
  -5  -9   4 1482.94  373.90
  -5   9   4 1786.40  218.51
   5  -9  -4 1824.18  173.40
 -11  -3  1210865.10  795.21
 -11   3  1210823.18  918.92
  11   3 -1210349.62  738.74
  12   2 -10 3881.90  578.91
 -12  -2  10 3661.71  525.03
  12  -2 -10 4127.45  637.14
  -9  -7   4 1177.65  237.09
  -9   7   4 1114.23  327.81
   9   7  -4 1206.28  315.99
  -9   7   3 5787.84  537.04
   9   7  -3 6480.01  614.19
  -9  -7   3 6299.35  525.46
  -7  -6  -8 3904.41  591.44
   7   6   8 3305.78  539.95
   7  -6   8 3793.13  548.94
  -8  -6  -6 3371.76  517.73
   8  -6   6 3201.97  626.06
   8   6   6 3095.71  501.12
   3   6  13 3457.25  581.68
  -3  -6 -13 3123.39  484.40
  11  -5  -3 6457.67  551.46
  11   5  -3 5403.70  457.47
 -11  -5   3 6033.96  524.05
  -5  -7  -9  937.62  438.65
   5  -7   9  916.94  263.80
   5   7   9 1260.64  500.39
 -10  -2  15 1556.94  221.90
 -10   2  15 1290.47  295.11
  12   1 -11 3625.87  562.47
  12  -1 -11 3786.44  605.90
  12   3  -8 9107.76  692.05
 -12  -3   8 7206.30  652.78
  12  -3  -8 8863.33  696.02
  10  -4   5 3372.86  538.82
  10   4   5 3674.39  598.93
 -10  -4  -5 3305.15  499.95
 -10   4  -5 3687.80  522.21
   8   5   8 4040.32  788.96
  -8  -5  -8 4561.68  777.20
   8  -5   8 4232.58  456.33
  -8   5  -8 3868.13  593.57
   8   2  11 7273.89  607.96
  -8   2 -11 8139.50  744.12
   8  -2  11 8180.32  631.93
  -8  -2 -11 8269.99  670.08
  -8  -7  -3 2707.16  445.96
   8  -7   3 2551.58  420.25
   8   7   3 2540.19  604.51
   5  -6  11  410.68  426.61
   5   6  11   86.00  210.91
  -5  -6 -11  445.23  243.85
  -3  -2  19 2563.68  404.41
   3  -2 -19 2402.54  399.57
  -3   2  19 2212.54  386.57
  11  -5  -6  815.13  620.51
  11   5  -6 1252.49  180.57
 -11  -5   6 1114.33  315.70
  -7   4 -11 3736.19  562.96
  -7  -4 -11 3842.93  581.60
   7  -4  11 3959.85  574.33
   7   4  11 3503.90  564.52
  10  -5   3  713.98  190.05
 -10   5  -3  625.34  126.66
  10   5   3  737.49  218.94
 -10  -5  -3  666.24  214.35
   7  -2 -18  233.97  290.66
  -7  -2  18  294.03  325.81
  -7   2  18  227.54  295.92
   9   7  -5 5629.24  550.42
  -9   7   5 5840.18  735.57
  -9  -7   5 6044.51  498.83
  -6  -8   9 1277.82  481.69
  -6   8   9 1219.07  232.92
   0   8  11 4848.37  490.18
   0  -8 -11 4375.87  441.48
  10  -6  -1 6587.83  554.11
  10   6  -1 7057.12  864.67
 -10  -6   1 6551.85  523.52
  -5   7  13  638.46  420.40
   5  -7 -13  278.74  193.20
  -5  -7  13  233.97  248.98
  -1  -1  19   44.00   77.53
   1   1 -19  186.70  280.34
   1  -1 -19   90.69  196.01
   9   7  -2 1016.79  310.89
  -9  -7   2 1280.10  524.80
  -9   7   2 1195.10  335.84
 -11   0  14 1074.54  195.40
  -1   9   8 1343.69  330.59
   1  -9  -8 1481.30  281.77
  -1  -9   8 1623.59  254.42
  -4   2  19   66.88  139.81
  -4  -2  19   31.79   94.02
   4  -2 -19   51.48  100.09
  12   0   2 2254.19  416.58
 -12   0  -2 2018.24  191.09
  -7   0 -13   31.05   89.89
   7   0  13  100.66  125.00
  -9  -5  13 2191.79  573.70
  -9   5  13 1541.94  257.27
  10   6  -7 6277.39  618.10
 -10  -6   7 5899.26  477.47
 -10   6   7 7020.72  586.76
  -2  -9   8 4506.94  429.17
   2  -9  -8 4186.25  658.57
  -2   9   8 3973.98  769.78
   5  -6 -1511797.78  834.29
  -5   6  1513372.37  969.17
  -6   5  16  412.19  223.64
   6  -5 -16  255.42  258.96
   3  -1  17  994.39  351.66
  -3  -1 -17  980.58  209.70
   3   1  17 1135.86  200.14
  -3   1 -17 1213.38  455.76
 -10  -4  13  204.76  248.15
 -10   4  13  300.52  333.28
  10   4 -13  221.98  212.35
  -7  -8   7 2100.89  314.50
  -7   8   7 2118.78  376.04
  12  -3  -1  656.73  701.80
  12   3  -1  700.96  249.93
 -12  -3   1  643.92  147.25
  -3  -8  -9 3722.00  728.26
   3   8   9 4970.32  461.83
 -10   5  11 6185.88 1036.09
 -10  -5  11 6018.97  526.39
  10   5 -11 5822.23  608.73
  11   5  -2 1393.32  230.36
 -11  -5   2 1214.19  330.91
  11  -5  -2 1017.28  292.96
  -6   0  19   37.23   76.82
  -4   8  11 2507.91  558.91
  -4  -8  11 2655.81  634.76
   4  -8 -11 2434.79  383.59
  -9   5  -6 3724.10  570.16
   9   5   6 3855.23  651.30
  -9  -5  -6 4517.20  413.56
   9  -5   6 4120.48  762.92
   6  -3 -18   32.37  108.48
  -6   3  18   63.85  151.76
  -9   0  1712903.42 1043.89
  -5  -9  -1  183.31  149.72
  -5   9  -1  373.49  322.94
   5   9   1  314.58  348.52
  12  -2   1 2096.79  616.04
  12   2   1 1889.19  574.67
 -12  -2  -1 1978.73  178.04
   7  -3  12  197.58  317.13
  -7   3 -12  260.75  394.84
  -7  -3 -12  238.09  199.92
   7   3  12  228.98  297.82
  -5  -9   5  952.82  239.54
  -5   9   5 1154.65  212.73
   5  -9  -5 1080.85  157.42
  -2   2  19   62.44  120.19
  -2  -2  19   31.68   75.76
   2  -2 -19  114.65  147.15
   0  -6 -15  215.32  229.14
   0   6  15  177.85  200.15
   1   2  18  861.14  204.13
   1  -2  18 1034.49  154.65
  -1  -2 -18 1272.47  233.59
  -5   2 -15 1116.07  454.26
  -5  -2 -15 1220.17  231.50
   5  -2  15 1100.84  385.20
   5   2  15 1009.15  393.65
 -11  -1  14 4323.90  500.20
 -11   1  14 3999.87  602.81
 -11  -5   7 4828.12  435.34
  11  -5  -7 5605.19  507.92
  11   5  -7 6323.53  520.14
 -10   0  -8 3643.14  557.57
  10   0   8 3540.60  560.50
   2   8  10 1983.95  283.81
  -2  -8 -10 2178.61  420.52
  -9  -7   6 1423.08  302.79
  -9   7   6 1626.68  588.82
   9   7  -6 1535.48  157.98
  -4   9   7 3474.69  554.77
   4  -9  -7 3825.16  558.30
  -4  -9   7 3689.20  569.25
 -11  -4  -2 7879.35  635.55
  11   4   2 7792.87  635.18
  11  -4   2 7911.84  646.82
 -12   1  -2 1829.58  292.89
 -12  -1  -2 1684.73  167.96
  12   1   2 2095.35  282.07
  12  -1   2 1380.20  680.61
   9   7  -1 4115.45  591.83
  -9  -7   1 3772.76  566.05
   9  -7  -1 3979.87  840.87
  -9   0 -10 3746.78  572.07
   9   0  10 3340.17  534.17
   0  -9   8 1136.94  226.80
   0   9   8 1022.30  226.62
   0  -9  -8 1091.51  181.73
   7   1  13 2268.49  440.64
  -7   1 -13 2278.66  530.45
  -7  -1 -13 2497.21  409.83
   7  -1  13 2332.64  391.33
   0  -3  18   63.17   74.21
   0  -3 -18   86.71  138.18
   0   3  18   86.55  229.40
  -4  -8  -8  804.88  653.29
   4   8   8  914.72  674.96
  -2  -6 -14 1309.70  294.09
   2   6  14 1159.62  379.68
  -7  -5 -10 2115.23  738.99
   7  -5  10 2872.95  449.73
   7   5  10 2884.84  492.75
  -4   2 -16 1946.71  306.52
  -4  -2 -16 2453.88  412.32
   4  -2  16 2332.86  384.21
   4   2  16 2053.80  472.39
   2   3  17   26.38  122.02
  -2  -3 -17   20.72   89.35
   2  -3  17   60.80  105.10
   4   9   4  548.33  198.84
  -4  -9  -4  448.53  385.43
  -8   0  18  709.35  171.94
  -6  -1  1911273.95  785.21
  -6   1  1912710.46  907.19
   6  -1 -1910754.17  752.21
  -9   1  17  540.27  288.76
   9  -1 -17  584.40  252.56
  -9  -1  17  671.48  157.68
  -7  -7  -6 4644.00  434.10
   7  -7   6 4669.09  448.21
   7   7   6 5058.66  483.69
  -3  -9   8 1192.68  219.75
   3  -9  -8 1442.97  165.84
  -3   9   8 1383.39  343.79
  -7  -8  -2 1694.16  489.49
   7   8   2 1861.82  263.18
  -7   8  -2 1712.46  492.27
   5  -2 -19 1861.19  198.07
  -5   2  19 1685.65  354.88
  -5  -2  19 1950.37  215.01
 -12  -3   9  486.37  282.84
  12   3  -9  548.47  171.06
  12  -3  -9  536.42  456.43
   1   7  13 1909.46  348.35
  -1  -7 -13 1727.95  223.63
  -9  -6  11 8497.46  878.02
  -9   6  11 8564.20  681.33
  10   6   0 2296.10  636.66
 -10  -6   0 2364.48  389.87
  10  -6   0 2420.97  417.36
   6   2  14  831.35  694.29
  -6  -2 -14  998.90  219.57
   6  -2  14  992.07  256.21
  -6   2 -14  931.20  208.86
 -10   0  16  202.90  166.73
 -10  -1  -8 4877.60  575.86
  10  -1   8 5749.41  680.86
  10   1   8 4374.99  688.33
 -10   1  -8 4375.26  683.82
   6   6  10 4727.30  836.72
   6  -6  10 5074.44  572.69
  -6  -6 -10 5099.57  595.74
  11   5  -1 4901.01  612.55
 -11  -5   1 5364.99  590.87
  11  -5  -1 5775.16  697.13
  -9  -6  -4 1175.53  413.13
   9  -6   4 1446.06  233.64
  -9   6  -4  896.42  147.00
   9   6   4  743.39  655.57
 -11  -2  -5 1252.34  201.72
  11   2   5 1198.16  615.36
  11  -2   5 1474.95  269.13
 -11   2  -5 1359.23  163.07
  -8   4  16 6395.88  714.92
  -9   1 -10 2725.74  392.46
   9   1  10 2845.08  732.85
  -9  -1 -10 2307.24  359.97
   9  -1  10 2341.11  371.61
  -3   5  17   37.27  102.38
   3  -5 -17  195.69  169.04
 -10   6   8   38.69   96.71
 -10  -6   8   95.80  136.16
  10   6  -8    5.24   66.02
  -2   7  14 2151.80  387.39
   2  -7 -14 1769.10  216.12
   3  -4 -18  176.07  276.47
  -3   4  18  229.95  277.47
  11  -3   4  621.26  217.72
 -11   3  -4  546.69  217.04
  11   3   4  609.07  730.30
 -11  -3  -4  550.43  212.66
  -3   7  14 4625.33  574.91
   3  -7 -14 2979.14  402.67
  -8  -7  10 1273.45  259.94
  -8   7  10 1214.86  491.51
  12   0 -12  125.81  141.61
 -11   4  11 1752.50  262.33
 -11  -4  11 1406.80  163.82
  11   4 -11 1498.92  395.84
   0 -10   0 2782.41  431.37
   0  10   0 2740.16  360.78
  13   0  -5 1908.91  436.55
  -9  -3  16 6990.45  831.06
  -9   3  16 9423.83  990.15
   6  -7   8 3721.23  461.10
  -6  -7  -8 3465.52  479.58
   6   7   8 3654.83  501.48
  -8  -1  18 1170.61  175.94
   8  -1 -18 1013.17  217.33
  -8   1  18 1155.82  203.44
   0   0  19  117.97  168.81
   0   0 -19   28.25  147.44
  -7   6  14    6.32  170.31
  -7  -6  14   36.21   96.97
  -1  -5 -16 1249.07  234.29
   1   5  16 1544.30  621.02
  -8  -3  17   21.25   60.78
  -8   3  17   58.60  164.60
  -5  -9  -2  169.38  211.86
  -5   9  -2  252.36  258.74
   5   9   2  184.22  237.52
   2   9   7 9718.14 1030.87
  -2  -9  -7 7707.35  816.28
  12  -2 -11 1787.55  260.60
  12   2 -11 1893.69  292.42
 -12  -2  11 2209.54  290.83
   2   0  18  513.68  621.57
  -2   0 -18  533.48  471.87
  13   0  -6   42.74  186.68
  -2   5  17 8178.51  906.23
   2  -5 -17 8102.25  878.29
  -9   7   7 7757.09  896.00
   9   7  -7 6712.49  731.42
  -9  -7   7 6408.56  728.37
   0 -10   1   90.38  180.59
   0  10  -1   21.47   74.43
   0 -10  -1   -4.25  115.53
   0  10   1   55.39   41.15
   4  -4 -18 4888.56  550.89
  -4   4  18 4569.46  566.81
  -6  -8  -5 1533.05  247.92
  -6   8  -5 1840.48  198.41
   6   8   5 1745.60  230.88
  -5  -9   6 2294.05  496.56
   5  -9  -6 2706.22  394.62
  -5   9   6 3547.09  526.40
  13   0  -4   -2.42  146.25
 -11  -5   8 1199.02  375.50
  11   5  -8 1612.39  189.31
 -11   5   8 1299.18  598.07
  12  -3   0 8010.11  881.12
 -12  -3   0 8488.28  920.47
  12   3   0 8039.69 1145.92
  -9   4  15 2184.77  358.26
  -9  -4  15 2221.28  303.93
   9  -7   0 1147.05  236.96
  -9  -7   0 1248.03  218.02
   9   7   0 1005.18  359.02
  -1  -4 -17 2790.84  399.54
   1   4  17 2795.22  448.29
   4  -5 -17 8498.99  866.67
  -4   5  17 8419.42 1063.89
  -9  -3  -9 7184.49  783.90
  -9   3  -9 6119.14  664.05
   9   3   9 6665.05  762.87
   9  -3   9 6728.78  745.99
  -2   4  18 7035.98  901.78
   2  -4 -18 6818.95  747.48
   1   8  11 2384.12  503.26
  -1  -8 -11 2567.16  376.19
   1  -2 -19 3205.94  447.93
  -1   2  19 3082.56  443.38
  -1  -2  19 3170.92  482.47
 -10   1  16 1795.41  252.97
 -10  -1  16 1354.83  183.44
  -3  -9  -6  365.66  443.01
   3   9   6  407.61  164.61
   1  10   0   51.16   48.11
   1 -10   0   93.79   97.72
  -1 -10   0  170.96  192.89
  -1  10   0   64.66  116.87
  -7   8   8 6674.25  741.58
  -7  -8   8 6644.19  732.19
   1 -10  -1 5776.88  626.58
  -1 -10   1 6072.34  669.74
  -1  10   1 4613.39  509.25
   9   4   8 3008.95  839.84
  -9   4  -8 3227.08  437.17
  -9  -4  -8 3491.74  492.28
   9  -4   8 3078.61  432.17
  -8  -6  13 2247.00  608.22
  -8   6  13 2072.07  394.82
   1  -7 -14 3111.38  569.41
  -1   7  14 2894.76  526.50
  -3   2 -17  775.74  266.34
   3   2  17 1038.26  289.53
   3  -2  17  634.53  132.94
  -3  -2 -17  647.32  173.60
  12  -1 -12  602.97  497.60
  12   1 -12  892.31  243.44
  13   0  -7 3376.88  555.33
  -8  -7  -4 1183.46  273.44
   8   7   4 1244.05  757.17
   8  -7   4 1028.29  178.61
  13   1  -5 4882.72  678.67
  13  -1  -5 4749.86  648.11
  -5  -8  -7 4049.06  562.11
   5   8   7 4987.48  607.21
   0   1 -19 4615.24  544.48
   0  -1 -19 5392.25  618.49
   0   1  19 5180.85  693.57
   0  -1  19 5198.44  603.44
   0 -10   2 2204.48  379.56
   0 -10  -2 2055.18  388.78
   0  10   2 1679.93  326.56
  -1  -9  -8 2249.59  602.49
   1   9   8 2260.28  392.01
   1  10   1 5647.94  653.21
   1 -10   1 6055.54  702.79
  -1 -10  -1 6167.51  676.21
 -11   0  -6  760.36  376.66
  11   0   6  797.56  232.70
   2  -1  18 3605.97  739.12
   2   1  18 2849.19  412.42
  -2   1 -18 3809.76  512.78
  -2  -1 -18 3752.61  511.70
  13   1  -6   61.03   94.92
  -2   8  12 4707.58  920.77
   2  -8 -12 4088.46  262.74
 -12  -4   5 1511.00  300.52
  12  -4  -5 1108.49  450.54
  12   4  -5 2143.55  331.82
  13   0  -3  172.71  204.45
 -10   3  -7 4198.09  473.93
  10  -3   7 4209.77  781.95
  10   3   7 4207.14  553.87
 -10  -3  -7 3787.71  682.30
  -4   7  14  177.15  284.12
   4  -7 -14  290.92  110.93
  -7   4  17 3622.65  529.13
  -1  10   2  215.64  373.56
  -1 -10   2  609.10  414.48
   1 -10  -2  681.37  188.15
  13   1  -4  147.94  208.39
  13  -1  -4   73.12  135.51
 -12  -4   4  770.01  124.05
  12  -4  -4  746.88  582.77
  12   4  -4  841.16  219.01
  -5  -8  11 1612.66  609.32
  -5   8  11 1642.50  436.28
   5  -8 -11 1392.13  162.85
  -8   0 -12 1494.11  209.49
   8   0  12 1581.29  268.98
   5   4  14 3290.20  579.01
   5  -4  14 3313.48  437.14
  -5  -4 -14 2967.66  420.11
 -11   3  13  865.67  247.10
  11   3 -13  455.41  418.35
 -11  -3  13  507.76  185.79
  -6  -8  10 5068.79  675.38
  -6   8  10 5981.06  701.56
 -11  -2  14  176.87  314.35
 -11   2  14  390.88  204.37
   4  -4  15 5829.55  711.07
   4   4  15 5175.96  872.66
  -4  -4 -15 6332.33  706.57
  10  -5   4 1369.97  221.47
 -10  -5  -4 1517.35  503.73
  10   5   4 1845.76  665.39
 -10   5  -4 1821.87  176.64
  12   4  -6 1567.89  454.67
  12  -4  -6 2007.25  396.30
 -12  -4   6 2204.61  320.43
   4   5  14 5347.26  663.56
  -4  -5 -14 4814.76  567.02
   4  -5  14 5321.00  562.33
  12   0   3 8732.23  945.15
 -12   0  -3 9164.41 1000.48
  12  -2   2 1381.03  269.05
  12   2   2 1209.20  336.62
 -12  -2  -2 1094.09  278.98
  -6   7  13 3507.01  513.48
  -6  -7  13 3689.14  510.81
  -7   7  12 1596.50  307.17
  -7  -7  12 1341.19  452.92
   8  -4  10 1124.37  199.36
  -8  -4 -10 1057.23  384.38
   8   4  10 1446.41  271.63
  -8   4 -10 1467.87  203.10
  -7  -2 -13 1192.34  802.54
  -7   2 -13 1131.21  538.74
   7  -2  13 1036.58  454.01
   7   2  13 1069.62  424.39
  11  -5   0 1819.99  539.32
 -11  -5   0 1600.80  203.42
  11   5   0 1708.79  604.04
  -3  -8  12 1452.76  233.86
  -3   8  12 1284.57  257.09
   3  -8 -12 1419.57  272.99
  -8   5  15 6758.32  764.62
   5  -5  13 1580.95  206.92
  -5  -5 -13 1430.43  249.00
   5   5  13  903.52  410.67
   8   8  -3 1261.37  257.55
  -8   8   3 1207.89  209.96
  -8  -8   3 1060.90  344.11
  10  -6   1 3325.86  463.11
 -10  -6  -1 4240.65  549.77
  10   6   1 4388.20  673.37
  -4  -9   8 5542.31  712.37
  -4   9   8 6784.65  792.12
   4  -9  -8 6011.56  646.41
  -1   8  12 2820.78  447.86
   1  -8 -12 2712.98  380.94
  12   3 -10 6231.39  705.88
 -12  -3  10 7001.99  744.46
  12  -3 -10 6458.14  964.92
  13  -1  -7 2498.37  580.96
  13   1  -7 2532.04  649.35
  12   4  -3 2366.78  668.07
 -12  -4   3 1647.07  187.49
  12  -4  -3 2078.36  680.37
  -1   5  17  849.08  265.75
   1  -5 -17  599.69  169.13
  -2  -9   9 2187.41  631.15
   2  -9  -9 1999.09  338.16
  -2   9   9 1315.36  270.18
   8   8  -4 1492.70  225.16
  -8   8   4 1292.48  558.38
  -8  -8   4 1552.12  321.07
   5  -4 -18  432.83  179.27
  -5   4  18  393.17  410.18
  -6   2  19   86.24  133.60
   6  -2 -19   90.64   91.91
  -6  -2  19  102.86  106.81
 -11  -1  -6 4195.74  665.56
 -11   1  -6 4181.35  584.45
  11   1   6 4839.43  594.29
  11  -1   6 4241.32  732.53
   1  -9  -9 4732.80  565.25
  -1  -9   9 5100.30  686.58
  -1   9   9 4902.66  624.38
  -7   8  -3 6039.34  734.64
  -7  -8  -3 6522.33  721.74
   7   8   3 6323.31  721.37
 -10   3  15   95.00  138.83
 -10  -3  15  124.42  128.01
  -1 -10  -2   74.62  109.08
   1  10   2   -6.11  103.85
   1 -10   2   47.51   86.30
  -9  -2  17 3579.37  492.98
  -9   2  17 3700.47  490.65
  -7   0  1910836.81  520.62
  -8  -8   2  533.46  522.03
  -8   8   2  492.82  167.33
   8   8  -2  465.30  212.13
  -3   6  16 1040.80  311.40
   3  -6 -16  768.20  252.39
  13  -1  -3 4768.45  586.98
  13   1  -3 8294.76  958.70
 -10   5  12  535.24  662.86
 -10  -5  12  545.53  185.46
  -4  -7 -11 2311.79  468.78
   4   7  11 2445.13  433.69
   1   6  15 4850.63  603.01
  -1  -6 -15 3944.34  516.12
 -10  -6   9 6620.44  734.41
  10   6  -9 5487.81  658.84
 -10   6   9 5061.09  790.64
  -8  -3 -11 3620.77  640.34
   8   3  11 4040.04  369.55
  -8   3 -11 3767.33  489.12
   8  -3  11 3721.86  499.97
  13   0  -8   63.51  174.07
   6  -9  -2 4101.62  490.76
   6   9  -2 3424.14  429.32
  -6   9   2 3355.76  459.63
  -6  -9   2 3855.96  719.42
  -2  10   1   67.11  119.69
   2 -10  -1   81.58  162.79
  -2 -10   1  153.57  198.74
  -3   3  19  255.72  257.92
   3  -3 -19  101.55  107.13
   8   6   7  494.67  575.11
  -8  -6  -7  613.30  557.84
   8  -6   7  803.53  180.60
  -6  -9   3 3560.89  486.38
  -6   9   3 4028.29  346.23
   6  -9  -3 3901.20  490.38
  -4  -9  -5 7806.79  837.97
   4   9   5 7192.76  969.59
   8   1  12 3321.43  476.93
   8  -1  12 3032.34  440.96
  -8   1 -12 2915.79  612.42
  -8  -1 -12 2602.35  382.71
  11   4   3 1622.80  481.36
 -11  -4  -3 1821.40  263.66
  11  -4   3 1614.57  327.55
  -9  -7   8 1552.57  401.54
  -9   7   8 1841.54  358.18
   3   7  12 2538.71  444.92
  -3  -7 -12 2527.51  475.09
  -1 -10   3 3122.95  438.86
  -1  10   3 2929.51  427.66
   1 -10  -3 2852.06  505.41
  -5   5  17   -6.91  160.49
   5  -5 -17   81.96  143.57
   7  -3 -18 9320.33  969.99
  -7   3  1810433.81  590.47
   0 -10  -3  671.02  176.02
   0  10   3  188.86  201.28
   0 -10   3  660.53  241.39
  10  -4   6 1208.80  221.50
 -10  -4  -6 1250.39  281.47
  10   4   6 1688.36  787.05
 -10   4  -6 1452.26  160.18
  -2  10   0 2376.93  344.09
  -2 -10   0 2722.22  441.60
   2  10   0 3030.56  394.00
   2 -10   0 2737.13  536.70
   1  -4 -18  422.24  452.15
  -1   4  18  577.88  745.18
   2  -6 -16    2.53   66.81
  -2   6  16  115.27  176.10
  10   2   8 2145.02  699.16
  10  -2   8 2201.87  379.76
 -10   2  -8 2287.79  337.03
 -10  -2  -8 2196.31  335.69
  -5   9  -3  503.94  242.06
   5   9   3  531.11  180.62
  -5  -9  -3  489.00  548.72
  -9  -7  -1 3939.02  512.44
   9   7   1 3931.34  694.36
   9  -7   1 3137.56  452.36
  12   4  -7 3050.54  633.61
 -12  -4   7 3036.66  398.00
  12  -4  -7 2608.52  482.19
  11   5  -9 5074.48  555.54
 -11  -5   9 5233.82  626.39
 -11   5   9 3647.98  512.11
  -7   5  16 1811.85  293.43
  -6  -4 -13 6835.60  784.09
   6   4  13 6893.23  793.72
   6  -4  13 6850.89  758.17
  -6   4 -13 6472.79  710.70
  13   0  -2   49.78   83.26
   4  -3 -19    4.86   62.77
  -4   3  19  -39.51  151.73
  12  -1   3  132.27  240.84
 -12  -1  -3  117.42  117.83
 -12   1  -3  218.01  270.27
  12   1   3  243.77  280.60
  -9   2 -10 1161.70  234.84
   9  -2  10 1464.92  249.14
  -9  -2 -10 1323.26  464.36
   9   2  10 1055.60  309.80
  -2  10   2 3381.29  488.64
   2 -10  -2 3086.66  412.68
  -2 -10   2 3529.35  478.80
  -6  -9   1 3611.49  503.32
   6   9  -1 4074.38  347.15
  -6   9   1 3960.18  497.43
  -5   9   7  872.52  233.59
   5  -9  -7 1083.62  167.15
  -5  -9   7  891.83  245.36
  -8  -8   5 1744.89  376.94
  -8   8   5 2269.23  694.60
   3   5  15 1776.86  384.98
  -3  -5 -15 1506.61  304.11
   6  -9  -4 5065.67  526.61
  -6  -9   4 4130.30  500.02
  -6   9   4 4562.52  675.58
  -8   2  18 6599.10  734.43
   8  -2 -18 6135.58  700.00
  -8  -2  18 7532.10  782.72
  -3  -4 -16 1789.12  522.26
   3  -4  16 1978.58  273.93
   3   4  16 1789.85  352.73
  -8   8   1  987.98  283.76
   8   8  -1  994.25  325.49
  -8  -8   1 1081.56  226.43
   4  -6 -16  159.90  139.96
  -4   6  16  112.08  283.74
   7  -1 -19  264.24  277.12
  -7  -1  19  309.79  248.97
  -7   1  19  286.11  328.79
 -11   0  1514273.23  541.29
   2 -10   1  587.91  224.58
  -2 -10  -1  619.53  333.78
   2  10   1  494.37  175.55
  -2  10  -1  399.16  393.99
  12   4  -2  709.58  248.81
  12  -4  -2  574.81  180.47
 -12  -4   2  618.34  140.36
  12  -3   1 1302.66  255.53
  12   3   1 1151.70  291.27
 -12  -3  -1 1394.40  176.23
  -7  -6  -9  194.66  173.17
   7   6   9  202.27  197.53
   7  -6   9  181.35  130.04
   3  -9  -9 4172.16  531.59
  -3  -9   9 3848.11  670.90
  -3   9   9 4355.73  542.00
  -9   5  14 1747.66  254.18
  -9  -5  14 1686.78  393.47
 -10  -4  14 5676.81  718.29
 -10   4  14 4872.81  581.70
 -10  -4  14 4051.17  409.40
  13   1  -8  251.52  358.89
  13  -1  -8  440.27  494.18
   0   7  14 2717.02  456.81
   0  -7 -14 2834.59  550.55
   2  -3 -19   95.86  162.26
  -2   3  19  126.51  223.29
   1  -3  18 9502.78  953.61
   1   3  18 9673.25 1109.76
  -1  -3 -18 9509.25 1010.19
   6   5  12 6326.38  733.63
   6  -5  12 6603.31  826.96
  -6  -5 -12 6608.26  737.93
   0  -9   9 4007.58  518.32
   0   9   9 3474.61  498.97
   0  -9  -9 4123.19  507.00
   5   7  10 2898.74  431.76
  -5  -7 -10 3275.79  465.02
   3   0 -20  -18.30  123.40
  -3   0  20   -2.66  128.85
   5  -3  15 7054.44  741.27
  -5   3 -15 7045.00  767.26
   5   3  15 6437.19 1003.46
  -5  -3 -15 7449.36  805.30
 -10  -2  16 6002.25  766.82
 -10   2  16 7285.68  789.94
  -4   8  12 4537.22  567.93
   4  -8 -12 4977.65  617.65
  -4  -8  12 4922.57  604.96
  -4   0  20   13.89   85.72
   4   0 -20  -13.05  116.71
  13   1  -2  973.84  759.80
  13  -1  -2  867.41  256.68
 -13  -1   2  822.79  144.28
  -9   5  -7 1112.29  152.02
   9   5   7 1113.95  815.18
   9  -5   7  916.60  246.71
  -9  -5  -7 1021.00  252.56
   2 -10  -3  522.27  317.73
  -2  10   3  294.21  331.96
  -2 -10   3  420.68  504.89
   8  -5   9 1390.81  458.18
  -8  -5  -9 1449.66  345.91
  -8   5  -9 1382.71  269.94
   8   5   9 1570.40  414.17
  -1 -10  -3 5444.18  666.06
   1 -10   3 4840.43  781.72
   1  10   3 5980.21  654.59
  -9   6  12   32.73  180.42
  -9  -6  12   51.32   89.10
  -7  -8   9 1822.35  264.50
  -7   8   9 1935.39  328.03
   6   9   0 2554.26  427.87
  -6  -9   0 2364.45  362.92
  -6   9   0 1841.73  630.41
   0  -8 -12 4815.86  565.89
   0   8  12 5421.68  664.31
  12   2 -12 4581.52  523.88
 -12   2  12 4855.07  588.18
 -11   4  12 1506.21  318.79
 -11  -4  12 1452.36  213.08
  11   4 -12 1256.56  442.35
   5  -7 -14 2308.30  361.80
  -5   7  14 2877.97  445.66
   3   8  10  509.39  530.10
  -3  -8 -10  548.93  628.63
  -8  -7  11 5189.10  894.87
  -8   7  11 5777.87  817.48
  13   2  -5 1131.36  295.40
 -13  -2   5 1405.22  205.01
  13  -2  -5  974.21  248.72
   2   7  13 2219.17  424.54
  -2  -7 -13 2117.41  342.38
  -4  -3 -16   17.20  149.44
   4  -3  16   18.88   73.07
  -4   3 -16   67.30  183.23
   4   3  16   26.42  162.19
   0  -2  19 1057.40  191.60
   0  -2 -19 1136.74  214.52
   0   2  19  942.93  229.12
  -9  -6  -5  636.36  417.44
   9  -6   5  659.68  331.70
  -9   6  -5  806.51  151.80
   9   6   5  808.55  197.50
  -1   6  16 2586.73  439.80
   1  -6 -16 2041.89  374.58
  -8  -8   6 1335.89  271.46
  -8   8   6 1199.95  406.79
  -1 -10   4  512.40  396.88
  -1  10   4  250.79  320.02
   1 -10  -4  249.42  274.14
   2  -2  18 4261.47  516.19
  -2   2 -18 4403.90  765.54
  -2  -2 -18 4131.26  585.54
   2   2  18 4576.73  653.85
 -12  -4   8 3534.90  438.60
  12  -4  -8 3406.14  523.39
  12   4  -8 4167.60  487.76
  13   0  -9 3579.82  489.56
 -11   1  15 1209.58  397.58
 -11  -1  15 1260.67  381.95
  13   2  -6 6944.07 1071.45
  13  -2  -6 7368.57 1052.13
 -13  -2   6 8191.40  846.12
  -6   9   5 2910.79  628.40
  -6  -9   5 3551.94  483.93
  -5   0 -16 8923.13  948.44
   5   0  16 8040.05  867.56
  12   0 -13 1575.03  475.72
  -5   3  19   23.28  108.68
   5  -3 -19   59.15  118.53
  -4  -6 -13   87.81  157.54
   4   6  13  -27.27  171.50
   7   7   7 1871.30  357.57
  -7  -7  -7 1504.97  256.93
   7  -7   7 1600.06  225.42
  13   2  -4 7649.71 1138.95
  13  -2  -4 6509.33  742.76
 -13  -2   4 9986.35  359.69
   0 -10  -4 3375.53  449.48
   0  10   4 2550.84  359.79
   0 -10   4 3077.86  420.84
   4   8   9 3373.14  466.06
  -4  -8  -9 3829.95  714.48
 -11  -5  -1 5952.88  973.62
  11   5   1 6587.48  742.12
  11  -5   1 6372.21  717.60
   6   3  14  160.33  170.36
   6  -3  14  121.67  223.94
  -6  -3 -14   68.57   97.78
  -6   3 -14  107.10  232.01
  -2 -10  -2 3478.59  483.71
   2  10   2 3310.74  497.51
   2 -10   2 3314.27  440.42
  -3   1  20 2726.51  428.50
   3  -1 -20 3193.80  450.68
  -3  -1  20 2655.51  382.93
  -8   8   0  227.46  137.08
  -8  -8   0  301.65  377.81
   8   8   0  205.72  129.03
  -4  -1  20  225.38  137.55
  -4   1  20  127.11  140.11
   4  -1 -20  140.93  169.82
  -6   8  -6 1083.16  181.77
  -6  -8  -6 1231.63  391.86
   6   8   6 1110.84  338.50
  13   0  -1  104.47  204.10
  11  -3   5 1107.13  351.28
  11   3   5  496.63  603.83
 -11  -3  -5 1145.16  186.03
 -11   3  -5  772.40  397.25
  -2   0  20  661.86  409.34
   2   0 -20  859.37  206.36
  -2  -9  -8  163.77  157.14
   2   9   8  274.99  409.78
   6   0  15   58.66  161.14
  -6   0 -15   80.27  125.08
  -5  -6 -12 8896.42  953.25
   5   6  12 7853.19 1041.65
   1   0  19 7163.28  828.52
  -1   0 -19 7606.26  817.88
   3   9   7 3070.60  516.45
  -3  -9  -7 3145.15  433.48
  -2  -8 -11 6370.27  705.51
   2   8  11 5766.33  990.76
  10  -6   2 2788.74  734.83
  10   6   2 2512.38  381.50
 -10  -6  -2 2907.41  585.35
   5   0 -20  135.10  102.72
  -5   0  20   96.33  180.50
  13  -2  -7 1808.10  363.70
  13   2  -7 1676.50  410.16
 -12  -4   1 1696.15  190.56
  12   4  -1 1328.79  580.00
  12  -4  -1 1627.84  276.23
  -4   0 -17  486.31  205.41
   4   0  17  685.85  458.70
   0  -5 -17 5780.21  635.92
   0   5  17 6305.85  754.46
 -11   2  -6 3759.03  491.21
  11   2   6 3303.41  496.15
 -11  -2  -6 3762.64  695.54
  11  -2   6 4261.26  540.53
   6  -4 -18 5209.53  568.88
  -6   4  18 5096.31  621.87
 -12  -3  11  495.26  443.51
  12   3 -11  426.40  135.12
 -12   3  11  750.78  234.21
   3   6  14 6642.27  900.52
  -3  -6 -14 7524.56  816.81
  -9  -7   9 3806.49  501.73
  -9   7   9 3360.68  478.07
  13  -1  -9 1577.02  514.13
  13   1  -9 1937.02  515.22
  -2  10   4 1798.89  266.09
   2 -10  -4 1662.76  364.02
  -2 -10   4 2052.27  340.91
  13   2  -3  566.33  199.38
 -13  -2   3  283.05  145.12
  13  -2  -3  222.12  339.80
  -8  -7  -5 2090.19  345.80
   8  -7   5 1855.82  519.50
   8   7   5 1444.32  526.88
  -5   1 -16  298.73  250.07
  -5  -1 -16  249.80  318.57
   5   1  16  412.93  486.44
   5  -1  16  316.75  395.44
  12   1 -13 4143.29  499.30
 -12   1  13 3825.83  560.11
  -7  -4 -12 3454.86  554.24
  -7   4 -12 3860.37  528.17
   7   4  12 3531.87  513.44
   7  -4  12 3554.30  467.44
  -3  10   1 6744.24  742.01
   3 -10  -1 7555.46  788.45
  -3 -10   1 7219.71 1116.18
 -10  -6  10   30.82   74.40
 -10   6  10   17.09   88.11
   5  -6 -16  770.35  233.24
  -5   6  16  675.49  309.88
   9   7   2 3344.79  472.82
  -9  -7  -2 3905.82  728.01
   9  -7   2 3496.69  482.11
  -6   9  -1 4873.12  534.68
  -6  -9  -1 5249.68  600.96
   6   9   1 4857.86  565.05
  -8   2 -12  928.30  440.46
   8   2  12  912.71  259.03
   8  -2  12  965.18  279.71
  -8  -2 -12  966.65  349.45
   2   5  16 3406.74  774.74
  -2  -5 -16 2477.55  367.92
 -10   0  -9 2213.69  358.77
  10   0   9 2233.01  373.96
  -3 -10   2  882.52  212.26
   3 -10  -2 1164.96  189.12
  -3  10   2  867.38  165.47
 -11   5  10 3138.98  689.16
 -11  -5  10 2925.96  437.90
  11   5 -10 3281.09  425.93
   1  -3 -19  841.21  222.41
  -1   3  19  813.09  241.84
   7   8   4  655.79  280.50
  -7   8  -4  883.55  403.60
  -7  -8  -4  651.64  625.06
  -5  -9  -4  510.30  214.08
   5   9   4  395.48  424.40
  13  -1  -1 6211.17  815.32
 -13  -1   1 6409.40  707.06
  13   1  -1 6845.91  769.31
 -12  -2  -3 1674.52  180.55
  12   2   3 1928.35  355.84
  12  -2   3 1955.81  472.64
 -12   2  -3 1772.08  172.73
  -3 -10   0  744.05  633.24
   3 -10   0  984.91  259.01
  -3  10   0  461.13  149.90
   3  10   0  558.42  326.28
   2  -1 -20  540.04  226.94
  -2   1  20  722.10  344.32
   2   1 -20  719.17  219.10
  -2  -1  20  631.65  317.71
   6  -5 -17 7905.09  806.97
  -6   5  17 8734.39  883.81
  -4  -9   9 2207.14  393.74
  -4   9   9 2447.52  414.95
   4  -9  -9 2610.11  390.31
   6   1  15  690.31  705.96
  -6   1 -15  935.61  497.22
   6  -1  15  844.56  180.37
  -6  -1 -15  971.73  220.24
   0   4  18 7584.31  778.86
   0  -4 -18 6559.26  661.03
   1  -1  19  703.81  307.07
   1   1  19  411.51  394.96
  -1  -1 -19  647.42  280.14
  -1   1 -19  535.49  189.44
  -5   9   8 3891.14  631.13
  -5  -9   8 4328.38  486.04
   5  -9  -8 4343.77  511.11
   1 -10   4  264.75  275.27
   1  10   4  138.62  228.87
   3  -3  17 6803.17  695.85
   3   3  17 7025.39  852.94
  -3  -3 -17 7629.11  751.78
  -9   0  18 2052.18  242.44
  -6   9   6 4963.34  538.87
  -6  -9   6 4856.41  524.08
  -5   1  20 3800.57  565.46
   5  -1 -20 3915.20  656.92
  -5  -1  20 4240.69  468.79
  -8  -8   7 1514.89  596.88
  -8   8   7 1613.86  516.47
  -6  -8  11  677.04  359.14
  -6   8  11  263.89  308.93
  -1  -9  -9 4536.66  478.89
   1   9   9 4582.15  515.79
   6  -7   9 1434.82  231.54
  -6  -7  -9 1466.99  377.07
   6   7   9 1818.50  371.05
  -2  -4 -17 4002.82  307.03
   2   4  17 5349.23  595.42
   4   1  17 2655.80  431.29
  -4  -1 -17 2646.15  415.83
  -4   1 -17 2391.35  391.09
   4  -1  17 2882.19  424.27
  -7  -2  19 2664.65  383.37
   7  -2 -19 2519.59  353.75
  -7   2  19 2287.75  400.23
  -3  10   3 5609.72  571.41
  -3 -10   3 4831.64  518.79
   3 -10  -3 5767.97  573.44
 -12   0  -4 4042.47  281.40
  12   0   4 4011.48  389.43
  10   5   5  404.50  228.86
  10  -5   5  246.74  440.01
 -10  -5  -5  342.30  179.99
 -10   5  -5  403.85  320.33
  12  -4  -9 2380.12  488.12
 -12  -4   9 2064.60  374.70
  12   4  -9 2056.98  215.15
  -5  -8  -8  727.17  513.10
   5   8   8  546.71  424.38
  13  -2  -8 6355.67  672.53
  13   2  -8 4281.86  792.11
   2  10   3  539.24  175.98
  -2 -10  -3  817.89  514.68
   2 -10   3  833.80  475.92
   4   9   6  191.10  175.24
   7   5  11 1734.33  586.21
  -7  -5 -11 1700.40  346.20
   7  -5  11 1534.09  413.57
  -1  10   5 2919.64  635.52
   1 -10  -5 3483.83  490.94
  -1 -10   5 3240.25  493.76
   9   0  11  150.32  256.97
  -9   0 -11  241.46  238.05
  10   1   9  467.78  466.72
 -10  -1  -9  418.77  392.19
  10  -1   9  427.06  223.86
 -10   1  -9  568.60  261.52
 -10   0  17    3.01   82.76
  -8   6  14   30.77  132.72
  -8  -6  14   -8.22  121.46
 -11  -3  14 5791.15  628.08
 -11   3  14 6641.21  679.21
  -7   6  15 8268.17  860.79
  -8  -8  -1 1335.46  381.46
  -8   8  -1 1578.61  353.82
   8   8   1 1718.86  456.39
   3 -10   1 7356.80  946.16
  -3 -10  -1 7875.75 1025.99
   3  10   1 7003.87  742.22
  -3  10  -1 6370.81  662.78
  13   0 -10  190.11  192.97
 -13  -2   2 5986.01  568.56
  13  -2  -2 7453.45  774.12
  13   2  -2 5837.49  619.99
  12   3   2 6540.97  770.47
  12  -3   2 7091.33  738.45
 -12  -3  -2 7184.32  680.00
   5  -8 -12  925.80  127.06
  -5  -8  12  852.51  737.99
  -5   8  12  813.97  291.69
   6  -6  11   61.38   79.40
  -6  -6 -11   79.40  165.40
   6   6  11   -6.08  140.82
   7   3  13 9507.94 1340.53
  -7   3 -13 9516.81  898.72
   7  -3  1310039.84  954.68
  -7  -3 -13 8977.77  948.14
   7   0  14 6078.15  693.74
  -7   0 -14 6331.37  646.18
  11   4   4 3367.33  519.97
  11  -4   4 3387.17  661.24
 -11  -4  -4 3399.44  478.93
   2  -9 -10 1779.84  313.89
  -2   9  10 1232.14  621.69
  -2  -9  10 1776.89  629.67
   0  10   5 1300.01  207.22
   0 -10   5 1527.37  542.40
   0 -10  -5 1608.11  309.26
  -9   1  18 1950.14  303.03
  -9  -1  18 1710.29  395.51
   0   6  16  110.67  185.28
   0  -6 -16   94.23  148.28
 -10   5  13 4746.18  547.17
 -10  -5  13 5413.95  547.40
  -9   4  16   32.72  126.27
  -1  -7 -14 2437.74  385.52
   1   7  14 1963.57  700.38
   6  -3 -19   65.61  122.32
  -6   3  19   90.68  245.31
  -8   4  17  193.94  174.69
  11   0   7  543.41  677.09
 -11   0  -7  563.69  225.90
  -7   7  13  587.42  282.28
  -1  -8 -12 2213.02  356.16
   1   8  12 2096.71  436.41
   1   0 -20 1402.78  270.99
  -1   0  20 1242.65  563.72
   1  -9 -10 1540.41  286.08
  -1  -9  10 1273.47  226.11
  -1   9  10 1166.27  276.63
  -9  -3  17  969.44  283.91
  -9   3  17  974.77  320.51
 -11   2  15 1643.88  360.70
 -11  -2  15 1568.52  266.14
  13   0   0  277.16  455.26
 -12  -1  -4 1552.00  556.68
 -12   1  -4 1497.29  262.28
  12   1   4 1390.74  518.85
  12  -1   4 1499.82  361.71
  -2  10   5 1017.60  262.10
  -2 -10   5 1501.04  293.35
   2 -10  -5 1157.07  287.93
   3  -7 -15  497.95  168.62
  -3   7  15  223.75  357.84
   3   0  18 5069.69  545.97
  -3   0 -18 5502.28  592.01
  12   4   0  709.65  346.64
 -12  -4   0  707.46  240.67
  12  -4   0  651.13  195.53
  -2   7  15 5165.40  640.01
   2  -7 -15 5193.77  678.98
   2   6  15  157.36  193.85
   9   4   9 3326.92  817.67
  -9  -4  -9 4086.88  319.64
  -9   4  -9 3803.65  527.43
   9  -4   9 4468.32  612.81
  -9  -1 -11 2278.37  358.87
   9  -1  11 1869.15  322.50
  -9   1 -11 2233.14  379.58
   9   1  11 1987.07  589.82
  -3  10   4  922.81  246.74
  -3 -10   4 1098.47  387.77
   3 -10  -4 1190.50  169.07
  -3   2  20  703.28  316.05
  -3  -2  20  383.46  324.30
   3  -2 -20  399.77  312.22
 -10  -1  17 8067.01  827.26
 -10   1  17 8907.47  843.27
  -6   9  -2 1362.24  231.92
  -6  -9  -2 1411.81  582.50
   6   9   2 1265.47  193.36
  -7  -8  10 3719.10  545.15
  -7   8  10 4000.94  328.46
  -8   0  19  339.32  225.09
  -6   0  20   31.26  111.93
   6   0 -20   89.69  107.57
  10  -3   8 1919.82  320.68
 -10   3  -8 2343.93  355.10
 -10  -3  -8 2229.42  437.41
  10   3   8 2096.43  407.99
  11   6  -4   54.36  132.93
  11  -6  -4  180.81  241.78
 -11  -6   4  178.74  223.18
  -4  -2  20 7141.33  686.30
  -4   2  20 5410.83  611.68
   4  -2 -20 6347.59  615.68
  13   1 -10  593.32  266.97
  13  -1 -10  565.22  397.16
  11  -5   2 3092.75  484.81
 -11  -5  -2 2824.86  425.70
  11   5   2 2224.36  380.43
   9  -3  10  452.43  503.35
  -9   3 -10  313.66  524.99
   9   3  10  426.04  497.63
  -9  -3 -10  471.65  485.27
  -2   8  13 1335.67  351.73
   2  -8 -13 1007.74  269.33
  11   6  -5 1202.47  276.16
  11  -6  -5 1151.99  213.23
 -11  -6   5 1076.03  263.90
  -7  -1 -14  560.47  604.36
  -7   1 -14  482.44  521.91
   7   1  14  567.17  181.89
   7  -1  14  610.49  215.44
  -6  -7  14  329.90  323.29
  -6   7  14  266.55  212.52
  -3   9  10 2341.05  392.06
  -3  -9  10 2491.67  563.72
   3  -9 -10 2555.57  372.84
   3  -8 -13 1810.83  293.67
  -3   8  13 1381.61  458.73
  11  -6  -3  438.81  408.46
 -11  -6   3  586.46  193.42
  11   6  -3  278.98  345.08
   3  10   2  576.71  223.26
   3 -10   2  782.78  165.12
  -3 -10  -2  711.75  638.07
 -11   1  -7 3441.14  465.75
 -11  -1  -7 3459.22  521.25
  11  -1   7 3325.60  517.72
  11   1   7 3617.27  546.44
  10   7  -4 1616.63  314.43
 -10  -7   4 1681.17  527.08
 -10   7   4 1583.33  304.02
  -1  -1  20 2436.71  549.77
   1  -1 -20 2652.94  443.29
   1   1 -20 2259.08  426.55
  -1   1  20 1860.18  473.93
  13   2  -9 1878.17  550.90
  13  -2  -9 2263.29  389.24
 -13  -1   0  340.45  183.87
  13   1   0  488.43  647.30
  13  -1   0  362.02  208.60
   5  -2  16 3086.55  460.47
  -5   2 -16 4317.15  485.11
   5   2  16 3949.03  587.10
  -5  -2 -16 3411.99  535.09
 -12   2  13 2026.91  489.58
  12   2 -13 1711.93  518.89
  10   4   7 2755.27  874.77
  10  -4   7 2944.99  463.32
 -10  -4  -7 2977.33  478.33
 -10   4  -7 2941.72  426.76
  -6   9   7 2039.37  530.84
  -6  -9   7 1892.66  675.51
   8  -6   8 3487.39  491.22
   8   6   8 2872.52  470.45
  -8  -6  -8 3798.16  562.39
  -3   1 -18 2298.77  427.88
  -3  -1 -18 2370.99  485.33
   3  -1  18 2150.90  345.21
   3   1  18 2392.82  402.06
 -11  -6   6  166.51  200.54
  11   6  -6   39.97  126.08
 -11   6   6   88.40  201.19
 -10  -7   3 1686.57  334.20
  10   7  -3 1141.11  272.25
 -10   7   3 1231.16  211.52
  -8   8   8 2995.64  506.76
  -8  -8   8 3354.16  499.95
  -4   7  15 5876.40  647.61
   4  -7 -15 6686.32  675.64
 -10  -6  -3 3730.72  630.18
  10   6   3 3887.19  939.91
  10  -6   3 3786.69  575.72
  10   7  -5 1305.28  474.99
 -10   7   5 1228.58  357.52
 -10  -7   5 1779.71  555.75
  11   4 -13 1857.36  266.12
 -11   4  13 1789.69  404.33
 -11  -4  13 2203.00  381.49
  -9   7  10 1606.39  327.13
  -9  -7  10 1416.96  473.69
 -10   3  16  -33.90  150.24
 -10  -3  16   36.97   49.45
  -8   1  19 5520.76  595.19
  -8  -1  19 5881.31  622.22
   8  -1 -19 5738.01  545.39
   6  -1 -20  688.95  369.69
  -6   1  20  512.19  480.88
  -6  -1  20  831.46  369.44
  -8  -7  12 1476.20  352.36
  -8   7  12 2076.51  720.50
   1  10   5 5745.85  580.56
  -1 -10  -5 5345.52  550.82
   1 -10   5 5775.20  589.35
  -1   8  13 1634.65  437.20
   1  -8 -13 2093.11  340.17
 -13  -2   1  109.77  152.99
  13   2  -1   80.38  167.74
  13  -2  -1  155.28  286.05
  -2 -10  -4 3192.00  467.60
   2 -10   4 3044.57  467.71
   2  10   4 2888.39  556.90
  -8   5  16  350.37  475.01
   0  -9 -10 1755.64  415.13
   0   9  10 1705.43  320.08
  -2  -2  20 8298.35  834.76
  -2   2  20 8681.71  915.08
   2  -2 -20 8496.01  830.83
   1  -7 -15  115.55  155.31
   9   7   3 1616.76  439.23
  -9  -7  -3 1932.32  626.11
   9  -7   3 1667.77  386.16
  -9   6  13 7554.30  998.62
  -9  -6  13 8489.70  805.72
   3  -5 -18 1672.15  260.12
  -3   5  18 1259.32  430.54
  -6   2 -15 6245.24  635.10
   6  -2  15 4714.68  519.13
   6   2  15 6657.58  702.74
  -6  -2 -15 5508.61  625.24
   1  -2  19 1131.66  169.17
   1   2  19 1725.84  309.03
  -1  -2 -19 1195.16  223.62
  -1   2 -19 1630.07  321.24
  -6   6  16  250.37  259.60
 -12  -3  12 2154.90  434.49
 -12   3  12 1850.39  327.70
  12   3 -12 1547.20  537.91
 -12  -4  10 7329.75  802.08
 -12   4  10 7771.87  890.59
  12   4 -10 7248.84  757.61
 -11   5  11 3160.01  503.39
  11   5 -11 2905.32  500.18
 -11  -5  11 2839.28  546.28
  -5   2  20  310.06  461.55
   5  -2 -20  411.22  288.09
  -5  -2  20  354.69  257.95
  13  -3  -5   79.68  155.18
 -13  -3   5   76.68  118.45
  13   3  -5   77.68  219.85
 -10   6  11 4012.90  360.34
 -10  -6  11 4607.75  533.68
  -4   2 -17 4931.44  532.69
   4  -2  17 3761.65  529.30
   4   2  17 5039.05  574.18
  -4  -2 -17 3552.37  566.55
   0   3  19  231.77  204.29
   0  -3 -19  136.07  178.58
  11  -6  -2   72.91   80.01
  11   6  -2   74.42  117.55
 -11  -6   2   37.74  126.34
 -12   0  14 1457.68  265.66
  -9   6  -6 1589.27  244.75
   9   6   6 1573.69  354.49
   9  -6   6  892.49  271.98
  -9  -6  -6 1047.76  477.87
 -10   4  15  467.13  566.84
   8   8   2  580.50  570.13
  -8  -8  -2  583.14  654.13
  -8   8  -2  703.22  157.38
   2   3  18   72.75  119.53
  -2  -3 -18   65.81   65.49
   2  -3  18   48.20   73.75
  10  -7  -2 1280.07  668.46
  10   7  -2 1413.21  327.08
 -10  -7   2 1129.34  325.71
  13  -3  -6 1376.50  295.54
 -13  -3   6 1550.45  321.72
  13   3  -6 1291.99  389.74
  -5  -9  -5 1647.74  422.73
   5   9   5 1696.70  302.80
   4  -5 -18   91.81  126.77
  -4   5  18   95.77  177.72
   1 -10  -6 1912.37  311.75
  -1  10   6 1937.91  388.69
  -1 -10   6 2090.63  355.44
   8  -4  11 5988.96  688.51
   8   4  11 5614.67  632.83
  -8   4 -11 6308.75  633.20
  -8  -4 -11 5591.35  580.86
  13  -3  -4 1279.69  559.43
 -13  -3   4 1035.95  161.17
  13   3  -4 1114.97  242.34
 -10  -7   6 1974.29  338.11
  10   7  -6 1498.54  499.45
 -10   7   6 1366.03  314.84
  -3 -10   5 3675.38  529.37
   3 -10  -5 3988.96  283.27
  -3  10   5 4132.46  465.40
  -9   5  15  841.07  366.21
  -3   4  19 3051.30  510.60
   3  -4 -19 1777.39  269.27
 -11   0  16 2968.45  452.61
   1   5  17 2523.67  485.01
  -1  -5 -17 2517.35  392.72
  -7   4  18  985.92  306.67
  10  -2   9 3714.39  561.12
 -10   2  -9 3364.75  470.49
  10   2   9 3927.50  729.83
 -10  -2  -9 3819.92  588.97
  -4 -10   2 2468.19  480.68
   4 -10  -2 2759.57  402.58
  -4  10   2 3130.64  482.96
  -5   9   9 1656.79  359.61
   5  -9  -9 1368.49  205.32
  -5  -9   9 1257.66  420.35
  -4  -7 -12 5667.81  591.55
   4   7  12 5502.52  760.64
   2  -5 -18  880.76  168.42
  -2   5  18  892.70  266.08
  -4  10   1  273.94  360.05
   4 -10  -1  342.40  322.70
  -4 -10   1  395.24  445.77
   6   8   7 2438.37  506.20
  -6  -8  -7 2295.02  521.64
 -11   6   7 3024.56  511.03
 -11  -6   7 2463.71  378.20
  11   6  -7 3149.93  467.15
   7   8   5 6309.97  655.23
  -7  -8  -5 6282.45  691.44
  13   0 -11 5270.33  749.42
   3   9   8  295.15  159.72
  -3  -9  -8  353.22  364.54
  -4   8  13  767.45  670.60
  -4  -8  13  885.94  313.12
   4  -8 -13  653.87  131.53
  -4   4  19  142.04  166.01
   4  -4 -19  235.10  189.65
   9  -5   8 2660.91  487.11
  -9  -5  -8 3075.50  466.86
  -9   5  -8 2892.46  427.04
   9   5   8 3043.76  491.37
  -2 -10   6 1141.33  591.20
   2 -10  -6 1424.95  419.37
  -2  10   6 1256.86  583.07
  -2  -9  -9 4398.77  479.67
   2   9   9 4214.96  498.41
  -9  -2  18  595.08  285.30
  -9   2  18  371.14  618.18
   0  10   6 1567.53  272.11
   0 -10   6 1708.15  319.30
   0 -10  -6 1826.64  306.92
  13   3  -7  285.46  239.08
  13  -3  -7  303.17  300.95
 -13  -3   7  251.40  264.35
  -7  -9   3  295.80  272.27
  -7   9   3  279.47  367.73
   7  -7   8 2531.92  401.00
   7   7   8 2139.76  389.03
  -7  -7  -8 2761.75  435.14
   4 -10  -3  807.31  297.12
  -4 -10   3 1014.64  296.12
  -4  10   3  794.45  493.71
  -8  -7  -6 1046.30  595.24
   8   7   6 1370.26  531.96
   8  -7   6  984.92  297.68
  -3  -7 -13 2645.29  422.68
   3   7  13 2010.60  852.67
   7  -6  10 4949.17  555.17
   7   6  10 4135.84  513.19
  -7  -6 -10 4833.59  532.29
   8   0  13  -60.16  136.63
  -8   0 -13   28.25  139.11
  11   3   6  517.09  679.18
  11  -3   6  486.60  414.52
 -11   3  -6  583.59  171.84
 -11  -3  -6  727.37  200.18
 -12  -1  14  963.66  289.69
 -12   1  14  840.52  374.44
  -4 -10   0 2962.30  457.56
  -4  10   0 3049.38  422.82
   4  10   0 3265.52  515.23
   4 -10   0 2808.14  443.67
  -7  -9   2  181.13  172.56
  -7   9   2  242.25  229.00
   7   9  -2  204.09  273.83
   3 -10   3 8556.26  831.31
   3  10   3 8114.50  899.69
  -3 -10  -3 8405.46  816.61
   4  -9 -10 3233.53  443.93
  -4  -9  10 2785.35  536.31
  -4   9  10 4149.13  497.97
  12  -5  -5 1131.41  327.22
  12   5  -5 1345.53  301.17
 -12  -5   5 1535.61  243.57
  13  -3  -3  155.34  310.50
 -13  -3   3  184.83  176.60
  13   3  -3  148.68  228.42
   6   9   3 7001.96  780.63
  -6  -9  -3 7486.28  736.93
  -6   9  -3 7250.26  682.66
  12   2   4 1738.71  427.33
 -12  -2  -4 1304.64  177.56
  12  -2   4 1366.61  292.07
 -12   2  -4 1774.83  279.00
  12   4   1 1554.87  311.52
  12  -4   1 1966.14  342.67
 -12  -4  -1 2035.29  350.08
  -7   5  17   38.53  218.36
  13   0   1   -1.05  169.76
 -13   0  -1    5.81   84.81
   2  -4 -19  351.07  394.77
  -2   4  19  233.19  215.94
  12   5  -4 1724.91  367.49
 -12  -5   4 1713.85  284.19
  12  -5  -4 1496.82  363.75
  -1  -4 -18   33.34  134.61
   1   4  18   83.01  204.31
  -5  -7 -11  881.57  328.78
   5   7  11  988.26  509.92
  -7  -9   4  692.17  515.65
  -7   9   4  786.62  353.90
 -11   1  16 3312.50  537.65
 -11  -1  16 3487.30  649.00
   8  -3  12  343.03  432.38
  -8  -3 -12  450.59  193.56
   8   3  12  264.16  256.67
  -8   3 -12  285.89  350.70
   3   8  11 1607.90  333.59
  -3  -8 -11 1591.50  344.63
   5  -5  14  583.13  132.26
  -5  -5 -14  571.58  591.75
   5   5  14  549.05  779.56
   9   2  11 1043.49  540.52
   9  -2  11 1103.70  367.12
  -9  -2 -11  853.60  224.75
  -9   2 -11 1047.09  296.47
  10   7  -1  295.21  350.47
  10  -7  -1  637.55  542.31
 -10  -7   1  490.15  456.29
 -10   2  17 1323.90  238.34
 -10  -2  17 1397.20  333.74
   5   4  15  749.16  235.89
   5  -4  15  682.38  143.86
  -5  -4 -15  651.11  650.36
   4   8  10 1364.94  316.09
  -4  -8 -10 1425.49  281.57
   4   5  15 2176.91  680.16
  -4  -5 -15 1860.72  423.98
  13  -1 -11 2362.94  762.75
  13   1 -11 1583.29  647.07
  13   2 -10 2443.18  653.03
  13  -2 -10 2505.88  720.01
  11   6  -1  160.60  199.93
 -11  -6   1  394.76  222.58
  11  -6  -1  446.07  449.35
  12   5  -6 1145.71  174.97
 -12  -5   6 1045.91  325.77
  12  -5  -6  730.21  723.08
  12  -3   3 1001.56  290.79
  12   3   3  839.54  529.83
 -12  -3  -3  886.16  288.43
  -3   6  1710821.58  632.79
   3  -6 -17 9839.53 1029.00
   8  -5  10 4114.21  480.31
  -8  -5 -10 4064.53  329.15
   8   5  10 3799.09  573.25
  -8   5 -10 3471.08  484.77
  -7  -2 -14 2587.86  409.71
   7   2  14 2946.19  488.81
   7  -2  14 2613.01  436.74
  -7   2 -14 2613.88  498.96
 -10  -7   7 1799.53  578.64
 -10   7   7 1650.50  557.29
   4   9   7 4685.90  509.12
  -4  -9  -7 4411.90  479.03
   7   9  -1   44.11   58.03
  -7   9   1   34.91  101.61
  -7  -9   1   41.69   63.66
   0  -8 -13 2559.73  404.33
   0   8  13 1529.64  352.83
   2   0  19  625.36  202.08
  -2   0 -19  448.96  622.36
   0   0  20   99.62  107.42
   0   0 -20   94.45  117.11
  -5   7  15  352.09  534.08
  12  -5  -3  564.75  421.97
  12   5  -3  369.72  357.85
 -12  -5   3  520.71  333.10
  -4  -4 -16 1500.53  275.48
   4  -4  16 1657.35  256.62
   4   4  16 1796.43  329.51
  -6  -8  12 5818.84  630.33
  -6   8  12 5263.50  587.84
   1   6  16 3899.25  690.30
  -1  -6 -16 3418.56  634.90
   5  -5 -18 2456.77  385.31
  -5   5  18 2389.19  445.31
   4 -10  -4 1547.82  254.74
  -4 -10   4 1444.37  308.96
  -4  10   4 2077.77  367.88
  -8  -1 -13  506.86  502.87
   8   1  13  154.06  323.20
  -8   1 -13  203.60  328.01
   8  -1  13  439.47  399.21
 -11  -2  -7 1443.24  737.54
  11   2   7 1654.84  352.42
 -11   2  -7 1510.54  375.87
  11  -2   7 1880.67  357.13
  -6   9   8 5675.05  671.75
  -6  -9   8 6742.06  728.37
  -1   2  20 1197.41  282.57
   1  -2 -20 1016.10  274.31
  -1  -2  20 1042.04  159.18
  -7   3  19  951.43  456.72
   7  -3 -19  543.37  124.52
  13   2   0 5797.43  627.44
  13  -2   0 5859.02  799.92
 -13  -2   0 5831.53  559.89
   2  -6 -17   92.08  206.36
  -2   6  17  148.22  274.96
  -5   4  19 2029.35  452.22
   5  -4 -19 1583.91  243.70
   3  -2  18 1758.12  272.85
  -3  -2 -18 1811.22  669.78
   3   2  18 2214.59  379.65
  -3   2 -18 1992.50  346.04
   4  10   1  244.77  125.71
   4 -10   1  179.53  219.54
  -4 -10  -1  153.85  174.02
 -13  -3   8 3897.09  512.71
  13  -3  -8 3278.01  587.52
  13   3  -8 3533.19  542.11
  13  -1   1 7753.16  793.09
  13   1   1 7864.77  789.46
 -13  -1  -1 8210.21  747.97
 -11  -6   8  127.38  115.15
  11   6  -8   43.61   89.80
 -11   6   8   43.15  164.01
 -12   0  -5 5901.03  599.05
  12   0   5 5927.41  654.26
   0   7  15 2149.80  461.03
   0  -7 -15 1929.38  301.69
  -8  -8   9  698.91  634.48
  -8   8   9  651.44  688.33
  -7  -9   5  347.87  465.13
  -7   9   5  364.61  311.82
  11  -5   3 3726.64  548.16
 -11  -5  -3 4164.65  465.43
  11   5   3 4762.87  561.04
  -4   6  17  417.10  403.31
   4  -6 -17  221.88  234.63
   6  -4  14  892.01  413.54
   6   4  14 1180.02  424.10
  -6   4 -14 1055.44  183.81
  -6  -4 -14  810.09  258.69
  10   5   6 1942.12  401.87
  10  -5   6 2315.69  430.62
 -10  -5  -6 2229.77  370.15
 -10   5  -6 2157.85  340.11
  -7   0  20  936.20  397.31
  -1  -9 -10 1694.53  291.48
   1   9  10 2066.78  325.14
  -1   5  18 1741.79  633.83
   1  -5 -18 2073.82  332.40
  -8  -2  19 1483.75  274.09
  -8   2  19 1163.92  243.18
  -6   2  20 5834.10  621.16
   6  -2 -20 6510.87  753.99
  -2 -10  -5 1294.70  421.08
   2 -10   5 1451.59  316.62
   2  10   5 1307.35  378.92
 -12  -5   7 2069.16  221.86
  12  -5  -7 2192.90  413.96
  12   5  -7 2562.58  411.97
   6   5  13  436.70  527.71
  -6  -5 -13  288.41  303.71
   6  -5  13  427.16  370.56
  13  -3  -2  307.69  262.66
 -13  -3   2  305.48  376.81
  13   3  -2  372.83  416.02
  11  -4   5  898.31  286.47
  11   4   5  940.18  309.77
 -11  -4  -5 1103.54  321.85
 -11   4  -5  938.81  226.04
   2   8  12 2178.06  817.69
  -2  -8 -12 1869.69  384.35
  -3 -10   6 1730.26  385.78
   3 -10  -6 1763.39  288.89
  -3  10   6 1739.95  736.99
  -7  -8  11 1888.69  551.11
  -7   8  11 2775.24  463.57
   2  -1  19 4670.90  511.97
  -2   1 -19 4719.17  728.37
   2   1  19 3577.71  546.34
  -2  -1 -19 4805.08  538.21
   0   1  20 1791.00  566.80
   0   1 -20 2037.48  329.03
   0  -1  20 2391.69  518.42
   0  -1 -20 2727.97  427.87
   1  10   6  932.04  187.08
   1 -10   6 1258.23  219.58
  -1 -10  -6 1176.89  206.21
   2   7  14 3819.42  590.84
  -2  -7 -14 3915.40  568.57
  -9   8   4 4250.51  489.26
   9   8  -4 3977.01  598.31
  -9  -8   4 4079.06  307.41
   9   8  -3 1576.02  352.40
  -9   8   3 1558.55  276.40
  -9  -8   3 2202.35  360.03
  -7   9   0   72.97  121.85
   7   9   0   -9.62   99.43
  -7  -9   0   75.56   80.78
   5   8   9 2890.06  925.10
  -5  -8  -9 2484.42  616.61
  -3  -5 -16  397.83  362.84
   3   5  16  490.00  295.90
  12   4 -11 1807.24  527.79
 -12  -4  11 2010.35  289.78
 -12   4  11 1263.51  457.78
 -11  -3  15  903.63  181.32
 -11   3  15  840.47  447.29
  12  -5  -2 2238.30  367.89
 -12  -5   2 2256.49  333.29
  12   5  -2 2451.65  350.41
  -2   9  11  512.24  609.20
   2  -9 -11  491.17  158.54
  -2  -9  11  350.10  404.38
 -10  -5  14  678.71  610.86
 -10   5  14  792.99  314.37
  -8   8  -3 1756.47  286.15
   8   8   3 1535.13  630.47
  -8  -8  -3 1418.10  282.88
 -12  -1  -5  512.96  165.83
  12   1   5  428.92  491.02
 -12   1  -5  573.96  163.98
  12  -1   5  442.51  692.96
  -9   7  11 1528.15  611.91
  -9  -7  11 2035.35  313.17
 -10  -7   0 1058.74  256.98
  10   7   0 1132.73  334.26
  10  -7   0 1165.43  320.01
  -7  -1  20 2234.02  361.81
   7  -1 -20 2105.18  365.15
  -7   1  20 1779.77  296.02
  -9  -8   5  942.24  401.61
  -9   8   5  529.82  236.59
   3  -3 -20 5830.95  846.27
  -3   3  20 5370.30  906.16
  -5  -8  13 1015.21  242.66
  -5   8  13  561.57  709.36
   1  -4 -19 1993.86  299.67
  -1   4  19 2627.02  408.68
  -9  -8   2 2720.40  704.21
  -9   8   2 3307.16  613.91
   9   8  -2 3287.91  430.76
  10  -6   4 2012.96  423.63
 -10  -6  -4 2381.94  357.64
  10   6   4 2077.41  737.78
  -6  -7 -10 3928.93  751.09
   6   7  10 3433.35  763.90
   4  -3 -20  437.62  454.92
  -4   3  20  332.23  327.91
   9   7   4 2329.68  815.97
  -9  -7  -4 2496.25  405.13
   9  -7   4 2257.60  354.83
   4   6  14 1476.09  574.86
  -4  -6 -14  957.50  200.24
  -1 -10   7 2943.42  420.40
   1 -10  -7 3196.03  412.99
  -1  10   7 2314.67  354.47
  -4  10   5 2329.21  429.65
   4 -10  -5 1734.57  249.28
  -4 -10   5 1532.50  546.96
   3  10   4  121.68  107.68
  -3 -10  -4   70.05  137.21
   3 -10   4   90.28  118.32
 -10  -7   8 1004.84  359.91
 -10   7   8 1146.79  570.56
 -11  -6   0  103.85  140.35
  11  -6   0   63.50  114.89
  11   6   0   18.67   76.64
  -1   9  11 4762.87  713.44
   1  -9 -11 4029.49  581.20
  -8   6  15  544.14  643.31
   5   6  13  621.02  436.22
  -5  -6 -13  549.33  613.19
  -7   9   6 1757.50  510.46
  -7  -9   6  946.18  298.44
   3   4  17  464.52  400.64
  -3  -4 -17  957.68  218.05
  10   0  10 1684.88  665.20
 -10   0 -10 1596.59  260.78
 -11   5  12 3702.50  626.37
 -11  -5  12 3549.85  502.27
   4 -10   2 2472.95  345.41
   4  10   2 1503.83  243.97
  -4 -10  -2 2235.50  594.35
  -1   6  17 5647.97  817.92
   1  -6 -17 6031.02  804.82
  -3  -9  11 2991.01  492.77
  -3   9  11 2900.56  746.60
   3  -9 -11 2970.19  622.65
  -2 -10   7 2437.99  640.81
   2 -10  -7 2804.80  375.08
  -2  10   7 1680.21  316.50
  -7  -7  14 1271.67  427.16
  -7   7  14 1309.64  251.54
 -12   2  14 5951.19  853.42
  13   0 -12  382.38  327.42
 -12   5   8  707.33  693.69
 -12  -5   8  963.79  287.56
  12   5  -8 1039.81  171.98
  13  -3  -9  236.70  411.77
 -13  -3   9  402.15  240.91
  13   3  -9  424.34  521.98
 -10   6  12   86.49  206.38
 -10  -6  12  125.23  125.84
  -5  -3 -16 2143.93  346.35
  -5   3 -16 1751.67  479.59
   5   3  16 1515.90  351.34
   5  -3  16 1911.75  298.56
 -12   3  13  298.12  260.88
 -12  -3  13  356.53  173.32
  12   3 -13  283.84  321.46
   5   9   6   90.62  107.38
  -5  -9  -6   86.49  146.18
 -11  -2  16  130.28  181.99
 -11   2  16  280.34  208.93
   5  -6 -17 9187.48 1193.42
  -5   6  1710115.57 1469.33
   6   9   4  813.06  443.42
  -6  -9  -4 1095.91  263.30
   0 -10  -7 1717.07  269.66
   0 -10   7 1485.96  306.85
   0  10   7 1800.93  297.95
 -11  -4  14  510.94  126.80
 -11   4  14  344.93  401.12
 -11  -4  14  438.15  193.09
  -9  -8   6 4454.69  630.80
  -9   8   6 4194.36  852.88
  13  -2 -11 2019.95  807.42
  13   2 -11 2376.34  384.74
 -11  -6   9 3696.50  535.50
 -11   6   9 3725.09  585.34
  -7   6  16  203.90  354.67
  13  -3  -1   25.83  107.05
  13   3  -1   89.97   91.04
 -13  -3   1   81.36  201.62
 -11   0  -8 4477.74  815.56
  11   0   8 5684.29  805.66
  -5   9  10 5190.87  771.69
  -5  -9  10 5196.33  727.34
  12  -4   2 1525.11  363.29
  12   4   2 1142.10  346.67
 -12  -4  -2 1479.96  244.43
  -9  -8   1 2559.07  390.02
   9   8  -1 2266.95  615.75
  -9   8   1 2933.83  419.02
  -2   3  20  278.45  364.58
   2  -3 -20  310.55  448.73
   7  -4  13 1309.79  279.65
   7   4  13 1258.49  500.03
  -7   4 -13 1412.99  350.08
  -7  -4 -13 1284.52  567.93
  -8  -7  13 6244.74  907.28
  -8   7  13 5850.04  811.24
  -6  -3 -15 1038.16  578.67
   6   3  15  968.20  217.53
   6  -3  15  922.46  183.86
  -6   3 -15 1136.69  248.36
  -1  -3 -19 3536.36  464.55
   1   3  19 2484.64  390.13
  -3  -6 -15 3525.35  558.81
   3   6  15 4911.61  722.58
  -7  -9  -1   42.67   91.58
   7   9   1   84.41  137.32
  -7   9  -1  106.48  133.51
  10   1  10 3846.88  417.89
 -10  -1 -10 4277.53  613.93
 -10   1 -10 3939.17  558.11
  10  -1  10 4820.15  710.50
   5  -3 -20 5211.14  710.17
  -5   3  20 5803.09  805.87
  13   0   2 1784.99  390.56
 -13   0  -2 1713.70  235.58
  12  -5  -1  191.69  216.02
  12   5  -1   83.71  141.95
 -12  -5   1  132.49  203.35
   4   3  17   48.81  152.35
   4  -3  17   45.55  103.68
  -4   3 -17   78.86  195.37
  -4  -3 -17  266.13  371.10
 -10   0  18   13.32   69.61
  -6   4  19  315.63  262.61
   6  -4 -19  164.48   86.35
   8   2  13 7384.91 1010.27
   8  -2  13 6991.51 1025.52
  -8  -2 -13 6947.95  949.25
  -8   2 -13 8404.96 1098.61
  -4   0  21 1004.61  303.60
   4   0 -21 1011.95  213.45
  -6   5  18  754.77  189.36
  13  -1 -12 1119.70  275.93
  13   1 -12  923.84  272.84
  -9   4  17 1990.57  319.46
   7  -8   6  825.59  167.55
   7   8   6 1197.61  245.47
  -7  -8  -6  932.58  234.21
  -9   0  19 7328.89  971.72
  -3   0  2110393.58 1344.73
   3   0 -21 9240.33 1200.06
  -9   6  14  547.36  627.41
  -9  -6  14  839.20  583.34
   7  -5  12  900.91  235.95
  -7  -5 -12 1038.85  249.56
  -7   5 -12 1252.42  234.86
   7   5  12 1244.28  495.32
  -1  -8 -13  713.89  498.44
   1   8  13  890.39  342.97
 -13  -2  -1   66.78  207.19
  13   2   1  210.77  166.03
  13  -2   1   32.85  115.01
   6   6  12 1559.57  553.70
  -6  -6 -12 1283.83  296.14
  -5   0 -17 1637.19  302.18
  10   3   9 2979.08  463.83
 -10  -3  -9 2283.00  332.57
  10  -3   9 2471.04  360.71
 -10   3  -9 2478.85  329.63
  -6  -9   9 1646.43  326.60
  -6   9   9  699.07  680.85
   0   9  11 3149.25  465.92
   0  -9 -11 2339.62  385.42
 -12   0  15   38.32  103.48
  10   4   8 1483.81  459.55
 -10  -4  -8 1533.44  314.15
 -10   4  -8 1643.16  283.76
  10  -4   8 1640.93  286.52
  -6   7  15 3462.15  660.96
  11   1   8 2318.10  403.73
 -11  -1  -8 1901.07  374.72
 -11   1  -8 2159.93  425.04
  11  -1   8 1812.22  643.54
   9  -6   7  358.84  535.72
  -9  -6  -7  425.19  528.59
  -9   6  -7  434.93  316.30
   9   6   7  378.04  560.64
   9   4  10 1765.00  723.05
  -9   4 -10 2013.81  280.95
   9  -4  10 1730.96  603.56
  -9  -4 -10 2004.89  376.71
  -3  10   7 2754.88  400.85
  -3 -10   7 3303.12  531.22
   3 -10  -7 3565.99  482.50
   6   0  16   32.43   94.93
  -6   0 -16   50.61   73.09
  -8  -6  -9  446.24  310.67
   8   6   9  439.56  671.44
   8  -6   9  345.46  285.65
  -2   8  14 5237.00  787.69
   2  -8 -14 4761.68  642.28
  -5  10   2 2068.98  500.78
  -5 -10   2 1946.07  601.42
   5 -10  -2 2011.44  296.25
   0  -5 -18 1464.36  489.04
   0   5  18 1944.90  344.19
  -9   0 -12 5748.38  825.85
   9   0  12 5679.44  801.22
   2   2  19 1824.80  310.06
  -2  -2 -19 2072.93  336.47
  -2   2 -19 2005.96  372.58
   2  -2  19 2201.52  318.01
   0   2  20 6871.29 1041.30
   0  -2 -20 6240.68  950.78
   0  -2  20 6726.84  920.99
   3  -8 -14  372.10  422.55
  -3   8  14  383.85  308.38
  -4  10   6 2308.45  358.91
   4 -10  -6 1904.46  462.62
  -4 -10   6 1943.08  323.54
 -10  -7  -1  308.09  312.52
  10  -7   1  252.25  287.43
  10   7   1  245.15  222.17
  -8  -8  10 3054.51  919.44
  -8   8  10 3879.44  621.08
  -9   3  18 6920.21  933.60
  13   1   2  568.37  265.09
 -13  -1  -2  668.06  344.03
  13  -1   2  747.33  337.49
  -7   9   7 1173.81  373.95
  -7  -9   7  901.03  289.27
   6   8   8  209.18  357.51
  -6  -8  -8  431.10  451.46
   3   9   9 3363.12  484.88
  -3  -9  -9 3748.19  485.40
  -5  10   1 4764.30  755.11
  -5 -10   1 4981.58  722.22
   5 -10  -1 4413.56  643.16
  -2  -5 -17 4102.86  596.37
   2   5  17 4608.74  698.51
  -8   4  18 4414.90  782.91
 -10   1  18 2186.98  322.37
 -10  -1  18 2272.81  339.32
  -5 -10   3 3840.47  328.28
  -5  10   3 2650.17  377.73
   5 -10  -3 3632.21  502.88
  -4   9  11  393.80  375.33
  -4  -9  11  502.76  413.08
   4  -9 -11  458.96  200.53
  -4   1  21 8251.72 1089.54
  -4  -1  21 8268.72 1155.29
   4  -1 -21 7629.99  997.43
   2 -10   6 2303.25  334.61
   2  10   6 2744.35  624.78
  -2 -10  -6 2577.73  370.76
  -3   7  16 2899.95  446.51
   3  -7 -16 2448.72  345.86
  -9   1  19  720.10  246.96
  -9  -1  19  757.27  354.36
  -4 -10  -3  692.31  347.49
   4  10   3  795.84  198.05
  12  -3   4 3931.76  781.11
 -12  -3  -4 3978.96  557.33
  12   3   4 3339.87  537.06
  -3  -1  21 1018.16  244.98
   3   1 -21  842.63  524.49
  -3   1  21  913.39  578.67
   3  -1 -21  869.98  765.89
  -9   8   7  932.41  264.72
  -9  -8   7  874.79  430.98
   5   0 -21 9573.76 1273.57
  -5   0  2111755.69  562.53
  -1  -7 -15 1089.95  587.05
   1   7  15 1003.44  430.40
 -10  -7   9 4216.10  721.50
 -10   7   9 3732.29  552.84
 -12   5   9 2562.18  424.37
  12   5  -9 2577.50  394.37
 -12  -5   9 2466.58  396.89
 -12   2  -5 1656.80  256.41
  12   2   5 1734.75  334.66
  12  -2   5 1843.91  355.55
 -12  -2  -5 1933.39  291.57
   8  -7   7 1926.22  281.32
   8   7   7 1660.40  459.66
  -8  -7  -7 1795.95  391.55
   9   8   0 2254.26  554.07
  -9   8   0 2294.69  565.59
  -9  -8   0 2215.48  346.40
 -11  -6  -1   84.23   65.72
  11   6   1  101.10  185.61
  11  -6   1  102.42  161.40
  -5   1 -17 1504.75  505.64
   5  -1  17 1022.52  203.49
  -5  -1 -17  879.48  410.04
   5   1  17 1668.82  305.09
   9   3  11 5757.92  982.46
  -9   3 -11 7074.28  931.30
  -9  -3 -11 5450.70  748.98
   9  -3  11 6488.96  878.92
  -7   2  20  925.38  383.38
   7  -2 -20 1504.28  218.99
   2  -7 -16  805.44  360.48
  -2   7  16 1160.35  889.12
 -12   1  15 5187.74  897.11
 -12  -1  15 5391.31  737.82
 -10  -3  17   69.56   86.00
 -10   3  17  -26.88  134.91
 -10   4  16 3038.35  435.65
   2   9  10  291.69  166.74
  -2  -9 -10  240.74  304.19
  13   3 -10 4943.56  682.33
  13  -3 -10 4301.56  632.67
  -4   0 -18   32.85  124.58
   4   0  18   22.05  107.77
  -2   0  21  478.68  494.38
   2   0 -21  459.67  187.24
   6  -1  16 5184.95  716.92
  -6   1 -16 5477.07  764.53
   6   1  16 5315.86  754.87
  -6  -1 -16 4863.41  685.98
   1  10   7 5195.24  760.28
  -1 -10  -7 4966.71  721.04
   1 -10   7 4995.92  707.97
  -7   3 -14 1081.69  214.43
   7   3  14  856.29  217.12
   7  -3  14 1119.14  199.07
  -7  -3 -14  954.67  397.52
 -11  -5  -4 3535.86  465.69
  11   5   4 2922.59  670.71
  11  -5   4 3195.56  460.79
  -9   1 -12 1135.94  238.06
   9  -1  12  900.42  198.68
  -9  -1 -12 1195.72  429.20
   9   1  12  701.75  819.01
   5  10   0 1392.30  215.21
   5 -10   0 1470.17  396.95
  -5 -10   0 1815.11  306.27
  -5  10   0 1701.95  267.01
  -4  -9  -8  319.14  405.79
   4   9   8  179.01  255.67
  -1   0 -20 2132.67  340.05
   1   0  20 1508.35  270.82
  -3 -10  -5 4521.91  922.83
   3  10   5 4590.41  696.14
   1  -8 -14 1071.70  191.38
  -1   8  14 1567.22  329.02
 -12   4  12 6008.81  835.84
 -12  -4  12 5251.81  853.54
  12   4 -12 4877.41  786.48
  -5 -10   4 1996.19  569.20
   5 -10  -4 2002.05  272.02
  -5  10   4 2005.19  301.15
   8  -8   4 1701.14  267.09
   8   8   4 1356.99  539.94
  -8  -8  -4 1485.13  507.81
 -13  -4   5  236.67  327.44
  13  -4  -5  375.76  290.01
  -9   5  16 1188.97  451.59
  14   0  -511093.77 1215.96
  14   0  -6  196.08  263.87
   0   4  19 1676.49  325.63
   0  -4 -19  903.47  688.84
  -8   5  17 5123.29  962.39
   0   6  17   64.67  130.97
   0  -6 -17  -47.68  135.31
  11   3   7 1952.25  391.03
 -11   3  -7 1591.12  328.42
 -11  -3  -7 2104.10  318.83
  11  -3   7 2120.59  502.57
  -1   3  20 7309.31 1091.02
   1  -3 -20 8376.20 1118.72
 -11   0  17 7389.84 1008.52
   4  -7 -16  312.87  250.48
  -4   7  16  517.18  755.57
   2   4  18 4636.34  681.51
  -2  -4 -18 4365.08  628.94
  13   4  -6 3760.56  508.53
  13  -4  -6 2951.07  727.93
 -13  -4   6 3640.23  469.04
  13   3   0   43.45  166.70
 -13  -3   0   37.64   97.05
  13  -3   0   -6.44  160.73
  -7  -9  -2  101.69  214.54
  -7   9  -2  123.01  226.56
   7   9   2  103.56  154.99
   7  -7   9  863.10  154.56
  -7  -7  -9  679.12  351.45
   7   7   9 1040.37  417.11
  -5   1  21  532.67  380.86
   5  -1 -21  788.76  344.17
  -5  -1  21  751.88  404.05
   3   3  18 2972.50  562.45
   3  -3  18 2667.73  434.79
  -3   3 -18 2804.31  409.28
  -3  -3 -18 3136.60  467.71
   4  -8 -14 3838.18  331.05
  -4   8  14 4417.90  816.27
  -7   0 -15  -40.96  140.49
   7   0  15  -15.12  130.34
  13  -4  -4 3126.58  451.23
  13   4  -4 3376.02  483.62
 -13  -4   4 3667.42  471.67
  12  -5   0 1913.46  474.48
 -12  -5   0 2140.14  419.96
  12   5   0 2194.00  347.70
  -2  -6 -16  226.66  366.76
   2   6  16  370.24  457.35
  -9  -5  -9  962.27  242.55
   9   5   9  817.32  921.08
   9  -5   9  739.57  439.36
  -9   5  -9 1189.10  194.01
 -11   6  10   41.66  126.86
 -11  -6  10  100.43  139.33
  -8   3  19   -3.39  232.14
  14   0  -4  114.55  141.75
   6  -3 -20  400.35  467.24
  -6   3  20  324.23  405.33
  14   0  -7 3955.58  697.72
  -1  10   8 1719.77  315.63
  -1 -10   8 1648.01  345.71
   1 -10  -8 1830.60  323.22
  -4   1 -18 3902.48  575.82
   4   1  18 3778.14  369.98
   4  -1  18 4033.61  577.12
  -4  -1 -18 4286.56  628.59
   2   1 -21 6764.08  905.08
   2  -1 -21 6986.61  946.79
  -2   1  21 8094.80 1098.59
  -2  -1  21 7148.18  934.71
  -8   0  20   53.75  209.77
  -6   8  13  121.28  236.75
  -6  -8  13   92.03  177.42
  -7   8  12 1185.55  691.62
  -7  -8  12 1104.22  344.79
  -6   6  17  -16.28  160.50
   2 -10  -8  278.64  405.22
  -2 -10   8  189.62  326.78
  -2  10   8  329.01  515.08
  -9  -7  12  810.02  570.16
  -9   7  12 1036.83  596.56
   1  -1  20 2960.60  469.86
  -1  -1 -20 2810.37  477.78
  -1   1 -20 3546.52  505.32
   1   1  20 3308.29  461.06
 -10  -2 -10 1348.57  316.13
  10   2  10 1391.87  682.74
  10  -2  10 1201.51  436.37
 -10   2 -10 1536.41  256.13
 -13  -4   7  665.53  412.40
  13  -4  -7  911.45  722.81
  13   4  -7  846.33  279.99
  12   0   6 2936.42  449.68
 -12   0  -6 2700.75  605.36
  14  -1  -5 1204.34  540.82
  14   1  -5 1338.65  474.69
  14   1  -6 2424.11  665.00
  14  -1  -6 2518.62  446.32
   9  -7   5 2064.78  353.21
   9   7   5 2156.98  408.91
  -9  -7  -5 2251.97  401.54
  -1   7  16 1450.17  291.66
   1  -7 -16 1276.24  335.68
  11  -4   6 2747.96  514.54
  11   4   6 3413.14  523.81
 -11   4  -6 3090.58  422.29
 -11  -4  -6 3137.18  423.90
 -11   1  17  467.96  439.47
 -11  -1  17  551.96  254.55
  13   2 -12  598.29  370.29
  -5 -10  -1 4921.60  698.75
   5  10   1 5436.61  804.72
  -5  10  -1 3985.48  626.69
 -13  -4   3  110.60  192.57
  13  -4  -3   90.11  146.90
  13   4  -3  176.92  177.94
 -10  -6  -5 1291.73  645.51
  10   6   5 1097.44  324.62
  10  -6   5 1031.17  309.04
  -4  -8 -11 5027.50  708.69
   4   8  11 4603.25  666.79
  10   5   7  768.16  318.02
  10  -5   7  547.16  294.89
 -10  -5  -7  575.94  485.99
 -10   5  -7  750.32  139.89
  13   0 -13 5258.86  925.08
  -6  -9  -5 4455.33  637.54
   6   9   5 4818.83  687.48
   4   7  13 1216.69  223.99
  -4  -7 -13 1233.41  251.40
   7   1  15 1759.38  419.01
   7  -1  15 1941.07  407.51
  -7   1 -15 2300.82  427.00
  -7  -1 -15 2362.24  356.20
   5 -10  -5 3068.33  395.36
  -5 -10   5 2954.67  547.56
  -5  10   5 2796.06  465.25
   7   6  11  138.84  177.51
  -7  -6 -11  150.08  206.93
   7  -6  11   76.47  133.35
   8   4  12  286.53  352.84
  -8   4 -12  348.03  367.72
   8  -4  12  238.71  301.31
  -8  -4 -12  234.20  214.11
  -9  -8   8 2956.58  410.82
  -9   8   8 3197.84  439.56
  -3  -8 -12 1589.55  527.10
   3   8  12 1251.38  270.76
 -11  -5  13 1332.45  585.91
 -11   5  13 1728.22  485.73
   1   9  11 5161.67  898.19
  -1  -9 -11 4744.99  690.44
  14  -1  -4 2594.82  453.65
  14   1  -4 2555.92  395.83
  14  -1  -7 1975.41  543.27
  14   1  -7 1988.84  823.24
  -9   8  -1 1663.86  258.62
   9   8   1 1555.67  507.03
  -9  -8  -1 1814.09  532.74
  -4 -10   7 1630.46  605.39
  -4  10   7 2026.47  333.92
   4 -10  -7 1947.71  280.66
  -7  -9   8 2917.09  411.00
  -7   9   8 2483.44  464.77
  -8  -1  20 1297.59  232.65
  -8   1  20  986.94  249.03
   8  -1 -20 1171.22  169.21
   6   0 -21  418.34  333.58
  -6   0  21  419.28  487.46
 -11   2  -8 2305.00  318.64
 -11  -2  -8 2270.68  391.44
  11   2   8 2427.73  830.79
  11  -2   8 2323.60  376.41
  12   4   3 1177.53  319.71
  12  -4   3 1232.86  248.88
 -12  -4  -3 1337.65  243.76
  14   0  -3 9816.77 1342.36
  14   0  -8  265.40  274.99
   0  10   8  940.84  539.39
   0 -10  -8  573.41  522.57
   0 -10   8  662.97  573.72
  -5  -7 -12 1813.42  329.54
   5   7  12 1804.73  702.42
 -10  -7  -2 1968.64  590.61
  10  -7   2 2059.79  579.98
  10   7   2 1869.30  558.88
  12   5 -10  844.51  327.02
 -12   5  10  937.01  241.35
 -12  -5  10  889.78  430.25
 -10   6  13 2483.58  404.82
 -10  -6  13 2229.11  382.92
  13  -2   2 4370.10  658.84
  13   2   2 4287.92  653.83
 -13  -2  -2 4256.98  612.53
  12  -1   6 2617.68  480.98
 -12  -1  -6 2464.41  330.76
 -12   1  -6 2336.67  339.48
  12   1   6 2405.27  400.85
   5   9   7 1289.56  255.15
  -5  -9  -7 1889.02  321.39
  -4 -10  -4 1888.66  315.15
   4  10   4 1907.06  397.45
 -10   2  18 4653.82  659.04
 -10  -2  18 3970.23  553.83
   4  -2 -21  784.70  335.35
  -4   2  21  558.40  739.10
 -12   3  14  395.28  482.39
  12   3 -14  463.38  435.88
 -10   5  15 4112.39  717.43
  -3  -7 -14 2803.25  423.36
   3   7  14 2733.00  553.92
   3   0  19 6281.76  875.74
  -3   0 -19 6227.70  863.69
  -7   4  19 2888.10  464.35
 -13   0  -3  140.55  199.51
  13   0   3  114.72  183.86
   3 -10  -8 1641.87  260.95
  -3  10   8 1033.31  859.17
  -3 -10   8 1432.42  486.95
  -2   9  12 1651.28  326.56
   2  -9 -12 1447.20  253.15
  -9  -2  19 2631.27  372.52
  -9   2  19 2838.61  410.58
   3  -2 -21 1893.95  281.45
  -3   2  21 2182.84  351.86
  13   1 -13 1007.31  257.69
   8  -5  11  473.58  170.59
  -8  -5 -11  464.91  597.16
  -8   5 -11  580.03  325.58
   8   5  11  579.15  593.11
  -1   0  21 7061.36  952.80
   1   0 -21 6293.19  858.10
 -13  -4   8 4271.13  580.40
  13   4  -8 4190.80  601.33
  13  -4  -8 3792.35  360.96
   0   8  14 3284.43  488.96
   0  -8 -14 3807.84  310.79
  -3   5  19  254.73  175.57
   3  -5 -19  344.51  346.86
 -10   7  10  858.50  249.60
 -10  -7  10  688.11  546.80
  -5   7  16 1856.15  369.63
 -11  -3  16 4935.90  676.74
 -11   3  16 5537.25  780.54
  -5  -9  11  539.00  622.66
  -5   9  11  661.12  635.03
  -5  -8 -10 1052.36  451.53
   5   8  10  850.03  584.26
  -7   5  18 1264.55  767.76
  -5   2 -17  232.20  220.50
   5  -2  17  300.80  439.18
  -5  -2 -17  451.94  397.35
  -6  -9  10 2911.13  600.95
  -6   9  10 3606.71  505.42
 -12   2  15 1555.06  315.55
 -12  -2  15 1728.80  270.22
  13   3 -11 1740.51  462.62
  -6   1  21 5001.22  753.58
   6  -1 -21 4663.48  694.97
  -6  -1  21 4826.33  693.66
  11   6   2   22.65  110.65
 -11  -6  -2   67.94  168.43
  11  -6   2  148.64  176.33
  13   4  -2 3562.16  637.45
 -13  -4   2 3683.83  470.99
  13  -4  -2 4182.92  635.03
  -4   5  19 4336.13  640.36
   4  -5 -19 5018.22  707.37
  14   1  -3  483.76  433.20
  14  -1  -3  693.25  750.67
   6   2  16  463.96  429.87
   6  -2  16  514.02  609.40
  -6   2 -16  388.57  523.29
  -6  -2 -16  839.12  408.29
  14  -1  -8 1682.48  397.93
  14   1  -8 2011.54  372.37
  -3   9  12 2711.91  486.62
  -3  -9  12 3236.41  550.21
   3  -9 -12 2915.34  423.39
  -9   2 -12 1455.54  255.03
   9   2  12 1186.35  532.44
   9  -2  12 1642.03  295.40
  -9  -2 -12 1587.46  299.71
  -8   9   3 1564.56  492.77
  -8  -9   3 2229.31  340.59
   1  -9 -12 3740.91  482.55
  -1   9  12 4029.62  636.68
  -5   8  14  201.88  161.29
  -8   8  11   85.80  182.73
  -8  -8  11  378.60  586.26
  -2  -8 -13 4196.73  605.59
   2   8  13 4180.35  800.49
  -8  -9   4 3839.08  755.48
  -8   9   4 3682.35  640.08
   8   3  13 1458.76  594.11
  -8   3 -13 1746.61  301.53
  -8  -3 -13 2176.32  342.22
   8  -3  13 2273.38  490.92
   5  10   2  695.12  295.23
  -5 -10  -2  666.29  218.01
  -7   9  -3  177.93  239.50
   7   9   3  187.89  297.18
  -7  -9  -3  170.59  240.68
  -2 -10  -7 1635.88  261.37
   2  10   7 1666.52  297.13
  -3   1 -19  971.34  339.83
  -3  -1 -19  847.80  439.99
   3   1  19 1004.46  516.29
   3  -1  19  877.40  167.07
  13   1   3 5050.42  740.80
  13  -1   3 5550.91  788.55
 -13  -1  -3 5811.75  805.76
 -11   4  15 1152.91  312.47
  -8  -9   2 2556.62  342.44
  -8   9   2 2577.94  309.42
  12  -5   1   86.04  171.21
 -12  -5  -1   64.92  122.55
  12   5   1  117.87  260.77
   5  -2 -21 1298.15  184.25
  -5   2  21 1536.27  468.14
  -5 -10   6 2068.24  301.44
  -5  10   6 2042.47  288.68
   1   1 -21  533.57  188.62
  -1  -1  21  509.20  360.95
  -1   1  21  308.15  426.39
   1  -1 -21  457.12  236.72
  -8   0 -14  619.68  718.56
   8   0  14  812.15  324.90
  13  -3   1   72.71  137.02
 -13  -3  -1   42.25   98.35
  13   3   1   97.41  172.84
   7   8   7 3028.78  368.61
[truncated: 99,505 more chars]
